# Supplementary material for: Extreme drought–accelerated dissolved carbon metabolism triggers pulsed CO 2 outgassing in karst lakes
Source: Copernicus journal article supplement (doi:10.5194/egusphere-2025-4284), 2025-11-24
Supplement: Supplementary file 1 [file Supplement table S1.xlsx]

## Sheet: PCC-6307
MolForm	r	p	O.C	H.C
C10H10O1	-0.822277	0.385407	0.1	1
C10H10O1N2	-0.226236	0.854716	0.1	1
C10H10O2	0.898696	0.289031	0.2	1
C10H10O2N2	0.853304	0.34919	0.2	1
C10H10O2S1	0.997653	0.0436272	0.2	1
C10H10O3	0.954163	0.193497	0.3	1
C10H10O3N2	-0.585758	0.601594	0.3	1
C10H10O3S1	-0.304601	0.802954	0.3	1
C10H10O4	0.939823	0.22198	0.4	1
C10H10O4N2	0.319636	0.792879	0.4	1
C10H10O4N2S1	0.647064	0.551993	0.4	1
C10H10O4S1	-0.67756	0.526075	0.4	1
C10H10O5N2	0.99973	0.0148032	0.5	1
C10H10O5S1	-0.994133	0.0689954	0.5	1
C10H10O6	0.935479	0.229936	0.6	1
C10H10O6N2	-0.215415	0.861779	0.6	1
C10H10O6S1	0.912225	0.268727	0.6	1
C10H10O7	0.730944	0.47816	0.7	1
C10H10O7S1	-0.999255	0.0245749	0.7	1
C10H11O2N1	0.997446	0.0455075	0.2	1.1
C10H11O3N1	-0.345174	0.77564	0.3	1.1
C10H11O3N1S1	-0.294906	0.809423	0.3	1.1
C10H11O4N1	0.457116	0.697765	0.4	1.1
C10H11O4N1S1	0.155921	0.900331	0.4	1.1
C10H11O5N1	0.208674	0.86617	0.5	1.1
C10H11O5N1S1	0.119115	0.923988	0.5	1.1
C10H11O6N1	-0.680639	0.523404	0.6	1.1
C10H11O7N1	-0.165657	0.894051	0.7	1.1
C10H12O1	-0.615585	0.57784	0.1	1.2
C10H12O2	0.634187	0.56267	0.2	1.2
C10H12O2N2	0.977455	0.135437	0.2	1.2
C10H12O2S1	0.674865	0.528404	0.2	1.2
C10H12O3N2	0.724757	0.483904	0.3	1.2
C10H12O3S1	-0.736561	0.472897	0.3	1.2
C10H12O4	0.398625	0.738975	0.4	1.2
C10H12O4N2	0.790944	0.41918	0.4	1.2
C10H12O4S1	-0.970929	0.153879	0.4	1.2
C10H12O5	0.716962	0.491064	0.5	1.2
C10H12O5N2	0.515484	0.655224	0.5	1.2
C10H12O5N2S1	-0.189003	0.878949	0.5	1.2
C10H12O5S1	-0.921921	0.253239	0.5	1.2
C10H12O6	-0.433242	0.714739	0.6	1.2
C10H12O6N2	-0.161525	0.896718	0.6	1.2
C10H12O6S1	-0.981849	0.121479	0.6	1.2
C10H12O7	0.598507	0.591522	0.7	1.2
C10H12O7S1	0.566787	0.616372	0.7	1.2
C10H13O1N1	0.941446	0.218936	0.1	1.3
C10H13O2N1	-0.41095	0.730394	0.2	1.3
C10H13O3N1	-0.989486	0.092399	0.3	1.3
C10H13O4N1	0.655857	0.544615	0.4	1.3
C10H13O4N1S1	0.81043	0.398467	0.4	1.3
C10H13O5N1	0.947191	0.207817	0.5	1.3
C10H13O5N1S1	-0.375387	0.75502	0.5	1.3
C10H13O6N1	0.999707	0.0154126	0.6	1.3
C10H13O6N1S1	-0.802052	0.407483	0.6	1.3
C10H13O7N1	0.584998	0.602191	0.7	1.3
C10H14O1	0.976238	0.139059	0.1	1.4
C10H14O2	0.989151	0.0938616	0.2	1.4
C10H14O2N2	0.840576	0.364433	0.2	1.4
C10H14O3	-0.314326	0.796443	0.3	1.4
C10H14O3N2	0.654113	0.546084	0.3	1.4
C10H14O3S1	-0.983285	0.116561	0.3	1.4
C10H14O4	0.638939	0.558747	0.4	1.4
C10H14O4N2	0.964477	0.170194	0.4	1.4
C10H14O4S1	-0.946804	0.208583	0.4	1.4
C10H14O5	0.0128749	0.991803	0.5	1.4
C10H14O5N2	0.549459	0.629668	0.5	1.4
C10H14O5S1	-0.99958	0.0184579	0.5	1.4
C10H14O6	0.949181	0.203829	0.6	1.4
C10H14O6S1	-0.972054	0.150859	0.6	1.4
C10H14O7	-0.205407	0.868296	0.7	1.4
C10H14O7S1	0.15065	0.903727	0.7	1.4
C10H15O1N1	0.982688	0.118631	0.1	1.5
C10H15O2N1	0.383588	0.749377	0.2	1.5
C10H15O3N1	0.986138	0.106124	0.3	1.5
C10H15O4N1	0.976741	0.137573	0.4	1.5
C10H15O4N1S1	-0.682323	0.52194	0.4	1.5
C10H15O5N1	0.975032	0.142559	0.5	1.5
C10H15O5N1S1	0.66951	0.533008	0.5	1.5
C10H15O6N1	0.535375	0.64034	0.6	1.5
C10H15O7N1	0.346976	0.774417	0.7	1.5
C10H15O8N1	-0.589248	0.598848	0.8	1.5
C10H16O1	0.465931	0.691439	0.1	1.6
C10H16O2	-0.995514	0.0603264	0.2	1.6
C10H16O3	0.939654	0.222294	0.3	1.6
C10H16O3S1	-0.973128	0.147918	0.3	1.6
C10H16O4N2	-0.158271	0.898816	0.4	1.6
C10H16O4S1	-0.581867	0.604645	0.4	1.6
C10H16O5	0.995861	0.0579428	0.5	1.6
C10H16O5N2	0.964884	0.169211	0.5	1.6
C10H16O5S1	-0.760139	0.450262	0.5	1.6
C10H16O6	0.970182	0.155854	0.6	1.6
C10H16O6S1	-0.354842	0.769069	0.6	1.6
C10H16O7	0.45756	0.697447	0.7	1.6
C10H16O7S1	0.203168	0.869752	0.7	1.6
C10H17O10N1S1	0.5557	0.624901	1	1.7
C10H17O3N1	-0.0640633	0.959188	0.3	1.7
C10H17O4N1	0.686568	0.518233	0.4	1.7
C10H17O5N1	0.860499	0.340303	0.5	1.7
C10H17O7N1	0.988961	0.0946826	0.7	1.7
C10H17O7N1S1	0.464122	0.69274	0.7	1.7
C10H17O8N1S1	0.675444	0.527904	0.8	1.7
C10H18O2	0.641675	0.55648	0.2	1.8
C10H18O3	-0.439794	0.710103	0.3	1.8
C10H18O3S1	-0.873431	0.323779	0.3	1.8
C10H18O4	-0.188517	0.879264	0.4	1.8
C10H18O4S1	-0.983025	0.117468	0.4	1.8
C10H18O5S1	-0.603956	0.58718	0.5	1.8
C10H18O6	0.81133	0.397488	0.6	1.8
C10H18O6S1	-0.166143	0.893737	0.6	1.8
C10H18O7	-0.94164	0.218569	0.7	1.8
C10H18O7S1	0.388285	0.746136	0.7	1.8
C10H20O4	-0.830033	0.376643	0.4	2
C10H20O4S1	-0.948713	0.204772	0.4	2
C10H20O6S1	-0.0990292	0.936853	0.6	2
C10H20O9S1	-0.0533756	0.966004	0.9	2
C10H6O3	0.840329	0.364724	0.3	0.6
C10H6O4	0.917085	0.261072	0.4	0.6
C10H6O4S1	-0.0676321	0.956911	0.4	0.6
C10H6O5	-0.146049	0.906689	0.5	0.6
C10H6O5N2	0.704688	0.502174	0.5	0.6
C10H6O6	-0.430505	0.716671	0.6	0.6
C10H6O6N2	0.0996783	0.936437	0.6	0.6
C10H6O7	0.667127	0.535048	0.7	0.6
C10H7O2N1	-0.959395	0.18204	0.2	0.7
C10H7O3N1	0.0715501	0.954411	0.3	0.7
C10H7O3N1S1	0.694801	0.510985	0.3	0.7
C10H7O4N1	-0.108736	0.930639	0.4	0.7
C10H7O4N1S1	-0.257236	0.834377	0.4	0.7
C10H7O5N1	0.988879	0.0950301	0.5	0.7
C10H7O5N1S1	0.910411	0.271531	0.5	0.7
C10H7O6N1	0.968643	0.159846	0.6	0.7
C10H8O1	0.99975	0.0142255	0.1	0.8
C10H8O2	0.994511	0.0667302	0.2	0.8
C10H8O2N2	0.789732	0.420439	0.2	0.8
C10H8O2S1	-0.999994	0.002292	0.2	0.8
C10H8O3	0.939579	0.222434	0.3	0.8
C10H8O3N2	-0.677938	0.525748	0.3	0.8
C10H8O3S1	-0.824802	0.382573	0.3	0.8
C10H8O4	0.371676	0.757567	0.4	0.8
C10H8O4N2	0.691821	0.513617	0.4	0.8
C10H8O4N2S1	-0.512689	0.657299	0.4	0.8
C10H8O4S1	-0.517787	0.653512	0.4	0.8
C10H8O5	-0.184677	0.881752	0.5	0.8
C10H8O5N2	0.689176	0.515945	0.5	0.8
C10H8O5S1	-0.982105	0.120617	0.5	0.8
C10H8O6	0.625216	0.570021	0.6	0.8
C10H8O6S1	-0.703479	0.503258	0.6	0.8
C10H8O7	0.827703	0.379294	0.7	0.8
C10H9O1N1	0.582647	0.604034	0.1	0.9
C10H9O2N1	-0.874735	0.322071	0.2	0.9
C10H9O2N1S1	0.892439	0.297985	0.2	0.9
C10H9O3N1	-0.681529	0.522631	0.3	0.9
C10H9O3N1S1	-0.125727	0.919747	0.3	0.9
C10H9O4N1	0.238757	0.84652	0.4	0.9
C10H9O4N1S1	-0.222185	0.857362	0.4	0.9
C10H9O5N1	0.383926	0.749144	0.5	0.9
C10H9O5N1S1	-0.853796	0.348589	0.5	0.9
C10H9O6N1	0.456951	0.697883	0.6	0.9
C10H9O7N1	0.255622	0.83544	0.7	0.9
C11H10O1	0.00338323	0.997846	0.0909	0.9091
C11H10O2	-0.191183	0.877535	0.1818	0.9091
C11H10O2N2	0.695086	0.510733	0.1818	0.9091
C11H10O2S1	-0.852724	0.349898	0.1818	0.9091
C11H10O3	0.385748	0.747887	0.2727	0.9091
C11H10O3N2	0.793933	0.416061	0.2727	0.9091
C11H10O3S1	-0.70127	0.505233	0.2727	0.9091
C11H10O4	-0.41097	0.73038	0.3636	0.9091
C11H10O4N2	0.919624	0.256986	0.3636	0.9091
C11H10O4N2S1	-0.892052	0.298531	0.3636	0.9091
C11H10O4S1	-0.901579	0.284818	0.3636	0.9091
C11H10O5	0.997695	0.0432328	0.4545	0.9091
C11H10O5N2	0.639829	0.55801	0.4545	0.9091
C11H10O5N2S1	-0.731428	0.477709	0.4545	0.9091
C11H10O5S1	-0.850366	0.352761	0.4545	0.9091
C11H10O6	-0.435263	0.713311	0.5455	0.9091
C11H10O6N2	0.91885	0.258239	0.5455	0.9091
C11H10O6S1	-0.997341	0.0464354	0.5455	0.9091
C11H10O7	-0.0527905	0.966377	0.6364	0.9091
C11H10O7S1	-0.830132	0.376531	0.6364	0.9091
C11H10O8	0.776861	0.433621	0.7273	0.9091
C11H11O2N1	0.988455	0.0968286	0.1818	1
C11H11O3N1	0.997233	0.0473699	0.2727	1
C11H11O3N1S1	-0.527871	0.645981	0.2727	1
C11H11O4N1	0.611518	0.581118	0.3636	1
C11H11O4N1S1	-0.944914	0.212289	0.3636	1
C11H11O5N1	0.963415	0.172735	0.4545	1
C11H11O5N1S1	-0.453706	0.700204	0.4545	1
C11H11O6N1	-0.0482009	0.969302	0.5455	1
C11H11O6N1S1	-0.838998	0.366284	0.5455	1
C11H11O7N1	0.658964	0.54199	0.6364	1
C11H11O8N1	0.868834	0.32974	0.7273	1
C11H12O1	0.958893	0.183168	0.0909	1.0909
C11H12O2	0.830505	0.376104	0.1818	1.0909
C11H12O2N2	-0.165652	0.894054	0.1818	1.0909
C11H12O2S1	0.865502	0.333999	0.1818	1.0909
C11H12O3	-0.234612	0.849236	0.2727	1.0909
C11H12O3N2	0.958861	0.18324	0.2727	1.0909
C11H12O3S1	-0.991402	0.0835429	0.2727	1.0909
C11H12O4	-0.536412	0.639558	0.3636	1.0909
C11H12O4N2	-0.453796	0.700139	0.3636	1.0909
C11H12O4N2S1	-0.997307	0.0467321	0.3636	1.0909
C11H12O4S1	-0.904553	0.28041	0.3636	1.0909
C11H12O5	0.768256	0.442249	0.4545	1.0909
C11H12O5N2	0.264429	0.829633	0.4545	1.0909
C11H12O5S1	-0.920591	0.255415	0.4545	1.0909
C11H12O6	0.90441	0.280623	0.5455	1.0909
C11H12O6N2	0.756099	0.454205	0.5455	1.0909
C11H12O6S1	-0.990688	0.0869469	0.5455	1.0909
C11H12O7	0.962319	0.175318	0.6364	1.0909
C11H12O7S1	-0.902858	0.28293	0.6364	1.0909
C11H12O8	0.351416	0.7714	0.7273	1.0909
C11H13O1N1	-0.979287	0.129799	0.0909	1.1818
C11H13O2N1	0.999957	0.00592476	0.1818	1.1818
C11H13O3N1	0.932775	0.234759	0.2727	1.1818
C11H13O4N1	-0.549344	0.629756	0.3636	1.1818
C11H13O4N1S1	-0.518645	0.652873	0.3636	1.1818
C11H13O5N1	0.863998	0.335906	0.4545	1.1818
C11H13O5N1S1	-0.906332	0.277741	0.4545	1.1818
C11H13O6N1	0.615578	0.577845	0.5455	1.1818
C11H13O6N1S1	-0.923314	0.250938	0.5455	1.1818
C11H13O7N1	0.79771	0.412089	0.6364	1.1818
C11H13O7N1S1	0.71663	0.491368	0.6364	1.1818
C11H13O8N1	0.481912	0.679885	0.7273	1.1818
C11H14O1	-0.400794	0.737469	0.0909	1.2727
C11H14O2	0.961805	0.176519	0.1818	1.2727
C11H14O2N2	0.802947	0.406528	0.1818	1.2727
C11H14O2S1	-0.0811974	0.948251	0.1818	1.2727
C11H14O3N2	0.99849	0.0349871	0.2727	1.2727
C11H14O3S1	-0.902902	0.282865	0.2727	1.2727
C11H14O4	-0.384456	0.748778	0.3636	1.2727
C11H14O4N2	0.988425	0.096957	0.3636	1.2727
C11H14O4N2S1	0.11629	0.925799	0.3636	1.2727
C11H14O4S1	-0.946156	0.20986	0.3636	1.2727
C11H14O5	0.997285	0.0469236	0.4545	1.2727
C11H14O5N2	0.948748	0.204701	0.4545	1.2727
C11H14O5N2S1	-0.890417	0.300826	0.4545	1.2727
C11H14O5S1	-0.959056	0.182802	0.4545	1.2727
C11H14O6	0.994703	0.065556	0.5455	1.2727
C11H14O6N2	0.601669	0.589005	0.5455	1.2727
C11H14O6S1	0.246307	0.841566	0.5455	1.2727
C11H14O7	0.862798	0.33742	0.6364	1.2727
C11H14O7S1	0.597613	0.592232	0.6364	1.2727
C11H14O8	0.630769	0.565479	0.7273	1.2727
C11H15O1N1	0.394845	0.741596	0.0909	1.3636
C11H15O2N1	0.958867	0.183228	0.1818	1.3636
C11H15O3N1	0.976319	0.138821	0.2727	1.3636
C11H15O4N1	0.985049	0.110224	0.3636	1.3636
C11H15O4N1S1	-0.336412	0.781573	0.3636	1.3636
C11H15O5N1	0.999566	0.0187569	0.4545	1.3636
C11H15O5N1S1	-0.994799	0.0649601	0.4545	1.3636
C11H15O6N1	0.991695	0.0821019	0.5455	1.3636
C11H15O6N1S1	-0.836964	0.368656	0.5455	1.3636
C11H15O7N1	0.898301	0.289605	0.6364	1.3636
C11H15O7P1	-0.989893	0.0905893	0.6364	1.3636
C11H16O1	0.617074	0.576636	0.0909	1.4545
C11H16O2	0.967957	0.161595	0.1818	1.4545
C11H16O2N2	0.940797	0.220158	0.1818	1.4545
C11H16O3	-0.989127	0.0939635	0.2727	1.4545
C11H16O3N2	0.901773	0.284531	0.2727	1.4545
C11H16O3S1	-0.980392	0.126278	0.2727	1.4545
C11H16O4	-0.415593	0.727148	0.3636	1.4545
C11H16O4N2	0.871991	0.325657	0.3636	1.4545
C11H16O4S1	0.672119	0.530769	0.3636	1.4545
C11H16O5	0.961293	0.177705	0.4545	1.4545
C11H16O5N2	0.774648	0.435854	0.4545	1.4545
C11H16O5S1	-0.851872	0.350934	0.4545	1.4545
C11H16O5S2	-0.603532	0.587519	0.4545	1.4545
C11H16O6	0.637012	0.56034	0.5455	1.4545
C11H16O6N2	0.750667	0.459464	0.5455	1.4545
C11H16O6S1	0.375676	0.754821	0.5455	1.4545
C11H16O7	0.974049	0.145351	0.6364	1.4545
C11H16O7S1	0.595721	0.593733	0.6364	1.4545
C11H16O8	0.632984	0.56366	0.7273	1.4545
C11H16O8S1	-0.0211897	0.986509	0.7273	1.4545
C11H17O2N1	0.873839	0.323246	0.1818	1.5455
C11H17O3N1	0.959378	0.182077	0.2727	1.5455
C11H17O4N1	-0.0745484	0.952497	0.3636	1.5455
C11H17O5N1	0.984333	0.11284	0.4545	1.5455
C11H17O5N1S1	-0.325781	0.788745	0.4545	1.5455
C11H17O6N1	0.647958	0.551247	0.5455	1.5455
C11H17O7N1	0.646733	0.552269	0.6364	1.5455
C11H18O1	0.966327	0.165677	0.0909	1.6364
C11H18O2	-0.994092	0.0692378	0.1818	1.6364
C11H18O3	-0.991788	0.0816418	0.2727	1.6364
C11H18O3N2	-0.748642	0.461412	0.2727	1.6364
C11H18O4	-0.147535	0.905732	0.3636	1.6364
C11H18O4N2	-0.407621	0.732717	0.3636	1.6364
C11H18O4S1	-0.96784	0.161891	0.3636	1.6364
C11H18O5	-0.368245	0.759917	0.4545	1.6364
C11H18O5S1	-0.955766	0.190058	0.4545	1.6364
C11H18O6	0.988548	0.096439	0.5455	1.6364
C11H18O6S1	-0.47588	0.68426	0.5455	1.6364
C11H18O7	0.982755	0.1184	0.6364	1.6364
C11H18O7S1	0.6375	0.559938	0.6364	1.6364
C11H18O8	0.838361	0.367028	0.7273	1.6364
C11H19O3N1	-0.198394	0.872855	0.2727	1.7273
C11H19O4N1	-0.57637	0.608937	0.3636	1.7273
C11H19O5N1	0.988734	0.0956496	0.4545	1.7273
C11H19O6N1	0.912035	0.269021	0.5455	1.7273
C11H20O2	-0.145027	0.907346	0.1818	1.8182
C11H20O4	-0.411111	0.730282	0.3636	1.8182
C11H20O4S1	-0.83141	0.375069	0.3636	1.8182
C11H20O5S1	-0.725712	0.483021	0.4545	1.8182
C11H20O6	0.972488	0.149679	0.5455	1.8182
C11H20O6S1	-0.594056	0.595052	0.5455	1.8182
C11H20O7	-0.606375	0.585246	0.6364	1.8182
C11H20O7S1	0.350774	0.771837	0.6364	1.8182
C11H22O4	0.228031	0.853542	0.3636	2
C11H6O4	0.804541	0.404823	0.3636	0.5455
C11H6O5	0.974561	0.143904	0.4545	0.5455
C11H6O6	0.997666	0.0435024	0.5455	0.5455
C11H6O6S1	0.997741	0.0428006	0.5455	0.5455
C11H6O7	0.940315	0.22106	0.6364	0.5455
C11H7O4N1	0.751289	0.458865	0.3636	0.6364
C11H7O5N1	0.983055	0.117361	0.4545	0.6364
C11H7O6N1	0.859449	0.341614	0.5455	0.6364
C11H7O7N1	0.822098	0.385607	0.6364	0.6364
C11H8O2	0.824275	0.383166	0.1818	0.7273
C11H8O2N2	-0.997508	0.0449533	0.1818	0.7273
C11H8O3	0.984039	0.113896	0.2727	0.7273
C11H8O3N2	0.769193	0.441317	0.2727	0.7273
C11H8O3S1	0.235151	0.848883	0.2727	0.7273
C11H8O4	0.999639	0.0171119	0.3636	0.7273
C11H8O4N2	0.645634	0.553187	0.3636	0.7273
C11H8O4S1	0.126662	0.919147	0.3636	0.7273
C11H8O5	-0.0600437	0.961752	0.4545	0.7273
C11H8O5N2	0.963994	0.171353	0.4545	0.7273
C11H8O5S1	-0.0511696	0.96741	0.4545	0.7273
C11H8O6	0.886202	0.306669	0.5455	0.7273
C11H8O6N2	0.844522	0.359769	0.5455	0.7273
C11H8O6S1	-0.497422	0.66856	0.5455	0.7273
C11H8O7	0.989221	0.0935567	0.6364	0.7273
C11H9O2N1	0.764029	0.446437	0.1818	0.8182
C11H9O3N1	0.995682	0.0591807	0.2727	0.8182
C11H9O3N1S1	0.944631	0.212839	0.2727	0.8182
C11H9O4N1	0.9991	0.0270072	0.3636	0.8182
C11H9O4N1S1	0.736915	0.472563	0.3636	0.8182
C11H9O5N1	0.980047	0.127386	0.4545	0.8182
C11H9O5N1S1	0.203685	0.869416	0.4545	0.8182
C11H9O6N1	0.992881	0.0760061	0.5455	0.8182
C11H9O7N1	0.848811	0.354638	0.6364	0.8182
C12H10O2	-0.374588	0.755568	0.1667	0.8333
C12H10O2N2	-0.497471	0.668524	0.1667	0.8333
C12H10O3	0.956857	0.187682	0.25	0.8333
C12H10O3N2	0.342235	0.777632	0.25	0.8333
C12H10O3S1	-0.875693	0.32081	0.25	0.8333
C12H10O4	0.635876	0.561278	0.3333	0.8333
C12H10O4N2	0.95319	0.195557	0.3333	0.8333
C12H10O4N2S1	-0.953749	0.194376	0.3333	0.8333
C12H10O4S1	-0.994373	0.0675704	0.3333	0.8333
C12H10O5	0.979829	0.128084	0.4167	0.8333
C12H10O5N2	0.999557	0.0189512	0.4167	0.8333
C12H10O5N2S1	0.96397	0.171412	0.4167	0.8333
C12H10O5S1	-0.89321	0.296895	0.4167	0.8333
C12H10O6	0.416797	0.726306	0.5	0.8333
C12H10O6N2	0.960556	0.1794	0.5	0.8333
C12H10O6S1	0.033099	0.978925	0.5	0.8333
C12H10O7	0.982789	0.118283	0.5833	0.8333
C12H10O7N2	-0.784072	0.426278	0.5833	0.8333
C12H10O7S1	-0.999553	0.0190273	0.5833	0.8333
C12H10O8	0.250286	0.838951	0.6667	0.8333
C12H11O2N1	0.0248982	0.984148	0.1667	0.9167
C12H11O3N1	-0.369625	0.758972	0.25	0.9167
C12H11O3N1S1	-0.853036	0.349518	0.25	0.9167
C12H11O4N1	0.999113	0.0268211	0.3333	0.9167
C12H11O4N1S1	0.777115	0.433365	0.3333	0.9167
C12H11O5N1	0.978849	0.131169	0.4167	0.9167
C12H11O5N1S1	0.868784	0.329804	0.4167	0.9167
C12H11O6N1	0.895986	0.292941	0.5	0.9167
C12H11O6N1S1	-0.20893	0.866004	0.5	0.9167
C12H11O7N1	0.262187	0.831113	0.5833	0.9167
C12H11O8N1	0.0468799	0.970144	0.6667	0.9167
C12H12O1	-0.0565606	0.963973	0.0833	1
C12H12O2	0.983528	0.115708	0.1667	1
C12H12O2N2	-0.877164	0.318865	0.1667	1
C12H12O3	0.997465	0.0453358	0.25	1
C12H12O3N2	0.999666	0.0164535	0.25	1
C12H12O3S1	0.455889	0.698643	0.25	1
C12H12O3S2	0.383442	0.749478	0.25	1
C12H12O4	0.878351	0.317288	0.3333	1
C12H12O4N2	-0.636323	0.560909	0.3333	1
C12H12O4N2S1	-0.924806	0.248455	0.3333	1
C12H12O4S1	-0.675165	0.528145	0.3333	1
C12H12O5	0.963321	0.172958	0.4167	1
C12H12O5N2	0.971043	0.153576	0.4167	1
C12H12O5N2S1	-0.454547	0.699603	0.4167	1
C12H12O5S1	0.748933	0.461133	0.4167	1
C12H12O6	0.999912	0.00844261	0.5	1
C12H12O6N2	0.868216	0.330534	0.5	1
C12H12O6S1	-0.882993	0.311049	0.5	1
C12H12O7	0.934485	0.231722	0.5833	1
C12H12O7S1	-0.813377	0.395253	0.5833	1
C12H12O8	0.63867	0.55897	0.6667	1
C12H12O8S1	-0.498653	0.667657	0.6667	1
C12H13O2N1	0.0152576	0.990286	0.1667	1.0833
C12H13O3N1	-0.303	0.804024	0.25	1.0833
C12H13O4N1	0.996476	0.0534617	0.3333	1.0833
C12H13O4N1S1	-0.222769	0.856981	0.3333	1.0833
C12H13O5N1	0.996091	0.0563102	0.4167	1.0833
C12H13O5N1S1	-0.480307	0.681051	0.4167	1.0833
C12H13O6N1	0.99989	0.00944464	0.5	1.0833
C12H13O6N1S1	0.526483	0.647021	0.5	1.0833
C12H13O7N1	0.952695	0.196597	0.5833	1.0833
C12H13O7N1S1	-0.467787	0.690103	0.5833	1.0833
C12H13O8N1	0.0747773	0.952351	0.6667	1.0833
C12H14O1	-0.0240223	0.984705	0.0833	1.1667
C12H14O2	-0.982878	0.117976	0.1667	1.1667
C12H14O2N2	0.972839	0.148716	0.1667	1.1667
C12H14O3	0.866272	0.333019	0.25	1.1667
C12H14O3N2	0.512714	0.65728	0.25	1.1667
C12H14O3S1	-0.957131	0.187082	0.25	1.1667
C12H14O4N2	0.985781	0.107486	0.3333	1.1667
C12H14O4N2S1	-0.45098	0.702149	0.3333	1.1667
C12H14O4S1	-0.937666	0.225964	0.3333	1.1667
C12H14O5	-0.424119	0.721168	0.4167	1.1667
C12H14O5N2	0.970665	0.15458	0.4167	1.1667
C12H14O5S1	0.473623	0.685892	0.4167	1.1667
C12H14O6N2	0.724537	0.484107	0.5	1.1667
C12H14O6N2S1	-0.922883	0.251653	0.5	1.1667
C12H14O6S1	-0.875078	0.321619	0.5	1.1667
C12H14O7	-0.303083	0.803968	0.5833	1.1667
C12H14O7S1	-0.730115	0.478933	0.5833	1.1667
C12H14O8	0.736256	0.473184	0.6667	1.1667
C12H14O8S1	-0.667824	0.534452	0.6667	1.1667
C12H14O9	0.389322	0.745419	0.75	1.1667
C12H15O1N1	0.98199	0.121006	0.0833	1.25
C12H15O2N1	0.879609	0.315609	0.1667	1.25
C12H15O3N1	0.67997	0.523986	0.25	1.25
C12H15O4N1	0.998514	0.0347078	0.3333	1.25
C12H15O4N1S1	-0.000284	0.999819	0.3333	1.25
C12H15O5N1	0.998033	0.039936	0.4167	1.25
C12H15O5N1S1	-0.610336	0.582069	0.4167	1.25
C12H15O6N1	0.962147	0.175721	0.5	1.25
C12H15O6N1S1	0.181999	0.883486	0.5	1.25
C12H15O7N1	0.890915	0.300128	0.5833	1.25
C12H15O7N1S1	-0.349577	0.772651	0.5833	1.25
C12H15O8N1	0.588147	0.599715	0.6667	1.25
C12H16O1	-0.461348	0.694732	0.0833	1.3333
C12H16O2	-0.533633	0.641652	0.1667	1.3333
C12H16O2N2	0.824956	0.382399	0.1667	1.3333
C12H16O2S1	-0.199291	0.872272	0.1667	1.3333
C12H16O3	-0.911293	0.270171	0.25	1.3333
C12H16O3S1	-0.924567	0.248853	0.25	1.3333
C12H16O4	-0.987977	0.0988181	0.3333	1.3333
C12H16O4N2	0.993084	0.074914	0.3333	1.3333
C12H16O4S1	-0.984449	0.112417	0.3333	1.3333
C12H16O5	0.977785	0.13444	0.4167	1.3333
C12H16O5N2	1	0.000174	0.4167	1.3333
C12H16O5S1	-0.951619	0.198839	0.4167	1.3333
C12H16O6	0.985176	0.109753	0.5	1.3333
C12H16O6N2	0.989144	0.0938928	0.5	1.3333
C12H16O6N2S1	0.0833041	0.946905	0.5	1.3333
C12H16O6S1	-0.92725	0.244332	0.5	1.3333
C12H16O7	0.99554	0.0601459	0.5833	1.3333
C12H16O7S1	-0.838	0.36745	0.5833	1.3333
C12H16O8	0.872311	0.325241	0.6667	1.3333
C12H16O8S1	-0.161118	0.89698	0.6667	1.3333
C12H16O9	0.28234	0.817779	0.75	1.3333
C12H16O9S1	-0.0208596	0.986719	0.75	1.3333
C12H17O2N1	0.493263	0.671608	0.1667	1.4167
C12H17O3N1	0.321925	0.79134	0.25	1.4167
C12H17O4N1	0.400906	0.737391	0.3333	1.4167
C12H17O4N1S1	-0.794244	0.415735	0.3333	1.4167
C12H17O5N1	0.997601	0.0441077	0.4167	1.4167
C12H17O5N1S1	-0.822642	0.384998	0.4167	1.4167
C12H17O5N3	0.0246158	0.984327	0.4167	1.4167
C12H17O6N1	0.997753	0.0426888	0.5	1.4167
C12H17O6N1S1	0.233218	0.850149	0.5	1.4167
C12H17O7N1	0.877456	0.318478	0.5833	1.4167
C12H17O8N1	0.1798	0.88491	0.6667	1.4167
C12H18O1	0.866323	0.332955	0.0833	1.5
C12H18O2	0.39559	0.74108	0.1667	1.5
C12H18O2N2	0.925969	0.2465	0.1667	1.5
C12H18O3	0.997749	0.0427273	0.25	1.5
C12H18O3N2	0.997232	0.0473797	0.25	1.5
C12H18O3S1	-0.981482	0.122706	0.25	1.5
C12H18O4	0.403788	0.735387	0.3333	1.5
C12H18O4N2	0.965145	0.168577	0.3333	1.5
C12H18O4S1	0.557672	0.623389	0.3333	1.5
C12H18O5	-0.422414	0.722366	0.4167	1.5
C12H18O5N2	0.984804	0.111124	0.4167	1.5
C12H18O5S1	-0.947093	0.208011	0.4167	1.5
C12H18O6	-0.984061	0.113816	0.5	1.5
C12H18O6N2	0.928479	0.242234	0.5	1.5
C12H18O6S1	-0.926772	0.245144	0.5	1.5
C12H18O7	0.996127	0.0560485	0.5833	1.5
C12H18O7S1	-0.115553	0.926272	0.5833	1.5
C12H18O8	0.964754	0.169524	0.6667	1.5
C12H18O8S1	-0.503197	0.664314	0.6667	1.5
C12H18O9	0.426877	0.719227	0.75	1.5
C12H18O9S1	0.0917518	0.941507	0.75	1.5
C12H19O3N1	0.924614	0.248775	0.25	1.5833
C12H19O4N1	0.903763	0.281586	0.3333	1.5833
C12H19O5N1	-0.109209	0.930337	0.4167	1.5833
C12H19O5N1S1	0.249454	0.839498	0.4167	1.5833
C12H19O5N3	0.448874	0.703651	0.4167	1.5833
C12H19O6N1	0.989092	0.0941152	0.5	1.5833
C12H19O6N1S1	0.363709	0.76302	0.5	1.5833
C12H19O7N1	0.991269	0.0841857	0.5833	1.5833
C12H19O8N1	0.345242	0.775594	0.6667	1.5833
C12H20O1	0.787722	0.42252	0.0833	1.6667
C12H20O4N2	0.916238	0.262421	0.3333	1.6667
C12H20O4S1	-0.984659	0.111657	0.3333	1.6667
C12H20O5N2	0.394768	0.74165	0.4167	1.6667
C12H20O5S1	-0.97993	0.127762	0.4167	1.6667
C12H20O6	0.969795	0.156867	0.5	1.6667
C12H20O6N2	0.968048	0.161364	0.5	1.6667
C12H20O6S1	-0.879615	0.3156	0.5	1.6667
C12H20O7	0.0910426	0.94196	0.5833	1.6667
C12H20O7S1	0.0874815	0.944236	0.5833	1.6667
C12H20O8	0.989366	0.0929254	0.6667	1.6667
C12H20O8S1	-0.805013	0.404317	0.6667	1.6667
C12H20O9S1	0.392175	0.743445	0.75	1.6667
C12H21O4N1	0.820623	0.387254	0.3333	1.75
C12H21O5N1	0.699113	0.507157	0.4167	1.75
C12H21O6N1	0.97513	0.142277	0.5	1.75
C12H22O2	-0.999263	0.0244382	0.1667	1.8333
C12H22O4	0.366227	0.761299	0.3333	1.8333
C12H22O4S1	-0.996182	0.0556487	0.3333	1.8333
C12H22O5	0.727724	0.481157	0.4167	1.8333
C12H22O5S1	-0.970994	0.153709	0.4167	1.8333
C12H22O6	-0.957933	0.185311	0.5	1.8333
C12H22O6S1	-0.908107	0.275055	0.5	1.8333
C12H22O7	-0.502273	0.664994	0.5833	1.8333
C12H22O7S1	0.996168	0.0557479	0.5833	1.8333
C12H22O8	-0.830482	0.37613	0.6667	1.8333
C12H22O9	-0.966951	0.164127	0.75	1.8333
C12H23O6N1S1	-0.417893	0.725538	0.5	1.9167
C12H24O10S1	-0.0153439	0.990231	0.8333	2
C12H24O6	-0.818321	0.38981	0.5	2
C12H26O4S1	-0.990525	0.0877069	0.3333	2.1667
C12H27O2N2S2P1	0.779873	0.430567	0.1667	2.25
C12H6O5	0.109044	0.930442	0.4167	0.5
C12H6O5N2	0.560379	0.621311	0.4167	0.5
C12H6O6	0.999822	0.0120133	0.5	0.5
C12H7O3N1	-0.746291	0.463665	0.25	0.5833
C12H7O4N1	0.620614	0.573767	0.3333	0.5833
C12H7O5N1	0.404919	0.734599	0.4167	0.5833
C12H7O6N1	0.838453	0.366921	0.5	0.5833
C12H7O7N1	0.367767	0.760244	0.5833	0.5833
C12H8O2N2	0.599126	0.59103	0.1667	0.6667
C12H8O3	0.75076	0.459375	0.25	0.6667
C12H8O3N2	0.547627	0.631063	0.25	0.6667
C12H8O4	-0.323957	0.789974	0.3333	0.6667
C12H8O4N2	-0.585475	0.601816	0.3333	0.6667
C12H8O4S1	-0.886612	0.306105	0.3333	0.6667
C12H8O5	-0.0468731	0.970149	0.4167	0.6667
C12H8O5N2	0.98556	0.10832	0.4167	0.6667
C12H8O5S1	-0.0462024	0.970576	0.4167	0.6667
C12H8O6	0.953612	0.194667	0.5	0.6667
C12H8O6N2	0.967753	0.16211	0.5	0.6667
C12H8O6S1	0.968563	0.160052	0.5	0.6667
C12H8O7	0.999983	0.00376436	0.5833	0.6667
C12H8O8	0.99615	0.0558825	0.6667	0.6667
C12H9O2N1	0.868638	0.329991	0.1667	0.75
C12H9O3N1	0.549185	0.629876	0.25	0.75
C12H9O3N1S1	0.934352	0.231959	0.25	0.75
C12H9O4N1	0.956445	0.188584	0.3333	0.75
C12H9O4N1S1	0.50098	0.665946	0.3333	0.75
C12H9O5N1	0.920892	0.254925	0.4167	0.75
C12H9O5N1S1	0.481552	0.680146	0.4167	0.75
C12H9O6N1	0.989862	0.0907293	0.5	0.75
C12H9O6N1S1	0.690622	0.514674	0.5	0.75
C12H9O7N1	0.835087	0.370834	0.5833	0.75
C12H9O8N1	0.99366	0.0717227	0.6667	0.75
C13H10O1	-0.142245	0.909136	0.0769	0.7692
C13H10O2N2	0.841787	0.363007	0.1538	0.7692
C13H10O3	-0.0920958	0.941287	0.2308	0.7692
C13H10O3N2	-0.267343	0.827709	0.2308	0.7692
C13H10O3N2S1	-0.495303	0.670114	0.2308	0.7692
C13H10O4	0.348836	0.773154	0.3077	0.7692
C13H10O4N2	0.0528089	0.966365	0.3077	0.7692
C13H10O4S1	-0.559782	0.621769	0.3077	0.7692
C13H10O5	0.973226	0.147646	0.3846	0.7692
C13H10O5N2	0.962662	0.174514	0.3846	0.7692
C13H10O5N2S1	0.999686	0.015944	0.3846	0.7692
C13H10O5S1	-0.954852	0.192026	0.3846	0.7692
C13H10O6	-0.334784	0.782673	0.4615	0.7692
C13H10O6N2	0.99932	0.0234737	0.4615	0.7692
C13H10O6S1	-0.368289	0.759887	0.4615	0.7692
C13H10O7	0.991488	0.0831234	0.5385	0.7692
C13H10O7N2	0.934111	0.232389	0.5385	0.7692
C13H10O7S1	0.889225	0.302489	0.5385	0.7692
C13H10O8	0.99298	0.0754756	0.6154	0.7692
C13H10O8N2	0.826979	0.380115	0.6154	0.7692
C13H10O9	0.883403	0.310493	0.6923	0.7692
C13H11O2N1	0.862831	0.337378	0.1538	0.8462
C13H11O3N1	0.769159	0.441351	0.2308	0.8462
C13H11O4N1	0.782641	0.427744	0.3077	0.8462
C13H11O4N1S1	-0.997495	0.0450689	0.3077	0.8462
C13H11O5N1	0.993626	0.0719154	0.3846	0.8462
C13H11O5N1S1	0.408087	0.732392	0.3846	0.8462
C13H11O6N1	0.990257	0.0889413	0.4615	0.8462
C13H11O6N1S1	0.55644	0.624334	0.4615	0.8462
C13H11O7N1	0.999874	0.0100961	0.5385	0.8462
C13H11O7N1S1	0.361653	0.764425	0.5385	0.8462
C13H11O8N1	0.879537	0.315705	0.6154	0.8462
C13H12O2N2	0.799061	0.410661	0.1538	0.9231
C13H12O3	-0.983408	0.11613	0.2308	0.9231
C13H12O3N2	-0.634613	0.562319	0.2308	0.9231
C13H12O3S1	-0.941954	0.217973	0.2308	0.9231
C13H12O4	-0.458467	0.696797	0.3077	0.9231
C13H12O4N2	0.999591	0.0182144	0.3077	0.9231
C13H12O4S1	-0.929913	0.239764	0.3077	0.9231
C13H12O5	0.423037	0.721928	0.3846	0.9231
C13H12O5N2	0.999722	0.0150135	0.3846	0.9231
C13H12O5S1	-0.965089	0.168713	0.3846	0.9231
C13H12O6	-0.45475	0.699457	0.4615	0.9231
C13H12O6N2	0.986314	0.105447	0.4615	0.9231
C13H12O6N2S1	0.702902	0.503774	0.4615	0.9231
C13H12O6S1	-0.987253	0.101756	0.4615	0.9231
C13H12O7	0.947057	0.208083	0.5385	0.9231
C13H12O7N2	0.990358	0.088475	0.5385	0.9231
C13H12O7S1	-0.489745	0.67418	0.5385	0.9231
C13H12O8	-0.310604	0.798937	0.6154	0.9231
C13H12O8S1	0.545546	0.632645	0.6154	0.9231
C13H12O9	0.463572	0.693135	0.6923	0.9231
C13H12O9S1	-0.949503	0.203177	0.6923	0.9231
C13H13O2N1	-0.385184	0.748276	0.1538	1
C13H13O3N1	0.954293	0.193221	0.2308	1
C13H13O4N1	0.996832	0.0506869	0.3077	1
C13H13O4N1S1	0.937193	0.226829	0.3077	1
C13H13O5N1	0.920836	0.255015	0.3846	1
C13H13O5N1S1	0.4594	0.696129	0.3846	1
C13H13O6N1	0.994894	0.0643629	0.4615	1
C13H13O6N1S1	-0.798294	0.411472	0.4615	1
C13H13O7N1	0.859633	0.341385	0.5385	1
C13H13O7N1S1	0.675621	0.527751	0.5385	1
C13H13O8N1	0.408386	0.732184	0.6154	1
C13H13O9N1	-0.906706	0.277177	0.6923	1
C13H14O1	-0.946358	0.209463	0.0769	1.0769
C13H14O10	0.502217	0.665036	0.7692	1.0769
C13H14O2	-0.550858	0.628601	0.1538	1.0769
C13H14O2N2	0.289326	0.813138	0.1538	1.0769
C13H14O3	0.603073	0.587886	0.2308	1.0769
C13H14O3N2	0.907529	0.275932	0.2308	1.0769
C13H14O3S1	-0.949407	0.203371	0.2308	1.0769
C13H14O4	0.98983	0.0908721	0.3077	1.0769
C13H14O4N2	0.999998	0.00124015	0.3077	1.0769
C13H14O4N2S1	0.967152	0.163622	0.3077	1.0769
C13H14O4S1	-0.939065	0.223388	0.3077	1.0769
C13H14O5	-0.537427	0.638792	0.3846	1.0769
C13H14O5N2	0.998728	0.0321117	0.3846	1.0769
C13H14O5N2S1	-0.668743	0.533665	0.3846	1.0769
C13H14O5S1	-0.952101	0.197837	0.3846	1.0769
C13H14O6	0.991627	0.0824411	0.4615	1.0769
C13H14O6N2	-0.0302072	0.980767	0.4615	1.0769
C13H14O6N2S1	0.938405	0.224607	0.4615	1.0769
C13H14O6S1	0.331332	0.785004	0.4615	1.0769
C13H14O7	-0.163983	0.895132	0.5385	1.0769
C13H14O7N2	0.84103	0.3639	0.5385	1.0769
C13H14O7S1	-0.761548	0.448879	0.5385	1.0769
C13H14O8	-0.210135	0.86522	0.6154	1.0769
C13H14O8N2	0.999365	0.0226873	0.6154	1.0769
C13H14O8S1	-0.148953	0.904819	0.6154	1.0769
C13H14O9	0.513336	0.656819	0.6923	1.0769
C13H14O9S1	0.453144	0.700605	0.6923	1.0769
C13H15O2N1	0.518338	0.653102	0.1538	1.1538
C13H15O3N1	-0.330891	0.785301	0.2308	1.1538
C13H15O4N1	0.41359	0.72855	0.3077	1.1538
C13H15O4N1S1	-0.973497	0.146894	0.3077	1.1538
C13H15O5N1	-0.375839	0.754709	0.3846	1.1538
C13H15O5N1S1	-0.781207	0.429208	0.3846	1.1538
C13H15O6N1	0.992618	0.0774039	0.4615	1.1538
C13H15O6N1S1	0.377223	0.753758	0.4615	1.1538
C13H15O7N1	0.997961	0.0406634	0.5385	1.1538
C13H15O7N1S1	-0.866413	0.332839	0.5385	1.1538
C13H15O8N1	0.650285	0.549299	0.6154	1.1538
C13H15O8N1S1	0.567275	0.615995	0.6154	1.1538
C13H15O9N1	0.85368	0.348731	0.6923	1.1538
C13H16O1	-0.10486	0.933121	0.0769	1.2308
C13H16O1N2	0.856243	0.345585	0.0769	1.2308
C13H16O2	-0.565955	0.617015	0.1538	1.2308
C13H16O2N2	0.999295	0.0239113	0.1538	1.2308
C13H16O3	-0.98024	0.126766	0.2308	1.2308
C13H16O3N2	0.912927	0.267632	0.2308	1.2308
C13H16O3S1	0.503009	0.664453	0.2308	1.2308
C13H16O4	0.995657	0.0593535	0.3077	1.2308
C13H16O4N2	0.99927	0.0243284	0.3077	1.2308
C13H16O4S1	-0.941862	0.218149	0.3077	1.2308
C13H16O5	0.263662	0.830139	0.3846	1.2308
C13H16O5N2	0.991135	0.0848312	0.3846	1.2308
C13H16O5S1	-0.957012	0.187343	0.3846	1.2308
C13H16O6	0.420972	0.723378	0.4615	1.2308
C13H16O6N2	0.993166	0.0744721	0.4615	1.2308
C13H16O6S1	-0.884874	0.308488	0.4615	1.2308
C13H16O7	0.99926	0.0244969	0.5385	1.2308
C13H16O7N2S1	0.231088	0.851543	0.5385	1.2308
C13H16O7S1	-0.843057	0.361508	0.5385	1.2308
C13H16O8	-0.0452889	0.971158	0.6154	1.2308
C13H16O8S1	-0.6616	0.539756	0.6154	1.2308
C13H16O9	0.663772	0.537909	0.6923	1.2308
C13H16O9S1	-0.723883	0.484711	0.6923	1.2308
C13H17O2N1	0.904144	0.281019	0.1538	1.3077
C13H17O3N1	-0.102263	0.934783	0.2308	1.3077
C13H17O4N1	0.854242	0.348044	0.3077	1.3077
C13H17O4N1S1	0.692163	0.513316	0.3077	1.3077
C13H17O5N1	0.930049	0.239528	0.3846	1.3077
C13H17O5N1S1	0.344081	0.776381	0.3846	1.3077
C13H17O6N1	0.994978	0.0638288	0.4615	1.3077
C13H17O6N1S1	-0.839168	0.366084	0.4615	1.3077
C13H17O7N1	0.993278	0.0738562	0.5385	1.3077
C13H17O7N1S1	-0.306877	0.801432	0.5385	1.3077
C13H17O8N1	0.876532	0.319702	0.6154	1.3077
C13H17O8N1S1	-0.715627	0.492282	0.6154	1.3077
C13H17O9N1	0.10991	0.929887	0.6923	1.3077
C13H18O1	-0.835099	0.37082	0.0769	1.3846
C13H18O10	0.587135	0.600512	0.7692	1.3846
C13H18O2	-0.54833	0.630528	0.1538	1.3846
C13H18O2N2	-0.87078	0.327229	0.1538	1.3846
C13H18O3	-0.748192	0.461844	0.2308	1.3846
C13H18O3N2	0.989674	0.0915657	0.2308	1.3846
C13H18O3S1	-0.967365	0.163089	0.2308	1.3846
C13H18O4	0.549978	0.629272	0.3077	1.3846
C13H18O4N2	0.995614	0.0596492	0.3077	1.3846
C13H18O4S1	-0.966802	0.164498	0.3077	1.3846
C13H18O5	0.985783	0.107476	0.3846	1.3846
C13H18O5N2	0.995109	0.0629868	0.3846	1.3846
C13H18O5S1	0.39184	0.743678	0.3846	1.3846
C13H18O6	0.964269	0.170695	0.4615	1.3846
C13H18O6N2	0.996859	0.050473	0.4615	1.3846
C13H18O6S1	0.572265	0.61213	0.4615	1.3846
C13H18O7	0.999103	0.02697	0.5385	1.3846
C13H18O7S1	-0.977123	0.136435	0.5385	1.3846
C13H18O7S2	-0.995836	0.0581183	0.5385	1.3846
C13H18O8	0.981923	0.121232	0.6154	1.3846
C13H18O8S1	-0.239337	0.84614	0.6154	1.3846
C13H18O9	0.709862	0.497514	0.6923	1.3846
C13H18O9S1	-0.103359	0.934082	0.6923	1.3846
C13H19O2N1	0.999537	0.0193688	0.1538	1.4615
C13H19O3N1	-0.297682	0.807573	0.2308	1.4615
C13H19O4N1	0.866751	0.332409	0.3077	1.4615
C13H19O5N1	0.933841	0.232871	0.3846	1.4615
C13H19O5N1S1	0.53616	0.639749	0.3846	1.4615
C13H19O5N3	0.624529	0.570582	0.3846	1.4615
C13H19O6N1	0.973386	0.147202	0.4615	1.4615
C13H19O6N1S1	-0.22995	0.852287	0.4615	1.4615
C13H19O7N1	0.991977	0.0806968	0.5385	1.4615
C13H19O7N1S1	-0.598368	0.591632	0.5385	1.4615
C13H19O8N1	0.623351	0.571542	0.6154	1.4615
C13H19O9N1	0.0311954	0.980137	0.6923	1.4615
C13H20O1	0.363557	0.763124	0.0769	1.5385
C13H20O3N2	-0.999992	0.00259086	0.2308	1.5385
C13H20O4N2	-0.695385	0.510468	0.3077	1.5385
C13H20O4S1	-0.969621	0.15732	0.3077	1.5385
C13H20O5	0.980888	0.124664	0.3846	1.5385
C13H20O5N2	0.998756	0.0317562	0.3846	1.5385
C13H20O5S1	-0.989172	0.0937691	0.3846	1.5385
C13H20O6	0.983702	0.115095	0.4615	1.5385
C13H20O6N2	0.892278	0.298212	0.4615	1.5385
C13H20O6S1	-0.988928	0.0948204	0.4615	1.5385
C13H20O7	0.970994	0.153706	0.5385	1.5385
C13H20O7S1	-0.0211345	0.986544	0.5385	1.5385
C13H20O8	0.0968201	0.938266	0.6154	1.5385
C13H20O8S1	0.107807	0.931235	0.6154	1.5385
C13H20O9	0.822352	0.385323	0.6923	1.5385
C13H20O9S1	0.757197	0.453136	0.6923	1.5385
C13H21O4N1	0.954243	0.193329	0.3077	1.6154
C13H21O5N1	0.999568	0.0187102	0.3846	1.6154
C13H21O5N3	0.925217	0.247766	0.3846	1.6154
C13H21O6N1	0.989661	0.091624	0.4615	1.6154
C13H21O6N1S1	0.696066	0.509864	0.4615	1.6154
C13H21O7N1	0.968749	0.159574	0.5385	1.6154
C13H21O8N1	0.995416	0.0609801	0.6154	1.6154
C13H22O4	-0.98015	0.127055	0.3077	1.6923
C13H22O4N2	-0.667777	0.534492	0.3077	1.6923
C13H22O4S1	-0.998912	0.0296967	0.3077	1.6923
C13H22O5N2	0.847027	0.356781	0.3846	1.6923
C13H22O5S1	-0.917602	0.260245	0.3846	1.6923
C13H22O6	0.999635	0.0172086	0.4615	1.6923
C13H22O6N2	0.296939	0.808069	0.4615	1.6923
C13H22O6S1	-0.862878	0.337319	0.4615	1.6923
C13H22O7	-0.980509	0.125898	0.5385	1.6923
C13H22O7S1	-0.152227	0.902711	0.5385	1.6923
C13H22O8	0.980335	0.126459	0.6154	1.6923
C13H22O8S1	0.592801	0.596044	0.6154	1.6923
C13H22O9S1	-0.222605	0.857088	0.6923	1.6923
C13H23O6N1	0.995223	0.0622494	0.4615	1.7692
C13H24O4	-0.996707	0.0516746	0.3077	1.8462
C13H24O5	-0.611336	0.581264	0.3846	1.8462
C13H24O5S1	-0.962712	0.174396	0.3846	1.8462
C13H24O6	0.927378	0.244114	0.4615	1.8462
C13H24O6S1	-0.695741	0.510152	0.4615	1.8462
C13H24O7	-0.199834	0.871919	0.5385	1.8462
C13H6O5	0.254681	0.836059	0.3846	0.4615
C13H6O7	-0.991161	0.0847067	0.5385	0.4615
C13H7O4N1	0.800602	0.409027	0.3077	0.5385
C13H7O5N1	0.996311	0.054698	0.3846	0.5385
C13H7O6N1	0.700445	0.505969	0.4615	0.5385
C13H8O2	-0.997129	0.0482554	0.1538	0.6154
C13H8O3	0.755333	0.454951	0.2308	0.6154
C13H8O4	0.883725	0.310055	0.3077	0.6154
C13H8O4N2	0.678234	0.525491	0.3077	0.6154
C13H8O4S1	0.762644	0.447802	0.3077	0.6154
C13H8O5	1	0.000425	0.3846	0.6154
C13H8O5N2	0.999999	0.000908	0.3846	0.6154
C13H8O5S1	0.994114	0.0691044	0.3846	0.6154
C13H8O6	0.893061	0.297106	0.4615	0.6154
C13H8O6N2	0.997565	0.0444383	0.4615	0.6154
C13H8O6S1	0.636154	0.561049	0.4615	0.6154
C13H8O7	0.995634	0.0595127	0.5385	0.6154
C13H8O8	0.9992	0.0254598	0.6154	0.6154
C13H9O2N1	-0.566522	0.616577	0.1538	0.6923
C13H9O3N1	0.968552	0.16008	0.2308	0.6923
C13H9O4N1	0.970096	0.156079	0.3077	0.6923
C13H9O4N1S1	-0.565088	0.617684	0.3077	0.6923
C13H9O5N1	0.981717	0.121921	0.3846	0.6923
C13H9O5N1S1	0.95907	0.182771	0.3846	0.6923
C13H9O6N1	0.997356	0.0463075	0.4615	0.6923
C13H9O6N1S1	0.996589	0.0525982	0.4615	0.6923
C13H9O7N1	0.659975	0.541134	0.5385	0.6923
C13H9O8N1	0.981738	0.121851	0.6154	0.6923
C14H10O10	0.950632	0.200873	0.7143	0.7143
C14H10O2	0.855119	0.346968	0.1429	0.7143
C14H10O3	0.219991	0.858795	0.2143	0.7143
C14H10O3N2	-0.97842	0.132495	0.2143	0.7143
C14H10O4	0.621459	0.573081	0.2857	0.7143
C14H10O4N2	0.999989	0.00295548	0.2857	0.7143
C14H10O4S1	-0.858706	0.342538	0.2857	0.7143
C14H10O5	0.996551	0.0528854	0.3571	0.7143
C14H10O5N2	0.987978	0.0988131	0.3571	0.7143
C14H10O5S1	-0.772102	0.438411	0.3571	0.7143
C14H10O6	-0.992501	0.078014	0.4286	0.7143
C14H10O6N2	0.634659	0.562281	0.4286	0.7143
C14H10O6S1	-0.605363	0.586056	0.4286	0.7143
C14H10O7	-0.0385259	0.975468	0.5	0.7143
C14H10O7N2	0.974797	0.143231	0.5	0.7143
C14H10O7S1	0.986058	0.106429	0.5	0.7143
C14H10O8	0.918967	0.258049	0.5714	0.7143
C14H10O8N2	0.999697	0.0156776	0.5714	0.7143
C14H10O9	0.970134	0.155982	0.6429	0.7143
C14H11O14P1	-0.369255	0.759226	1	0.7857
C14H11O2N1	0.869166	0.329312	0.1429	0.7857
C14H11O3N1	0.746331	0.463627	0.2143	0.7857
C14H11O4N1	0.103084	0.934258	0.2857	0.7857
C14H11O4N1S1	-0.154949	0.900957	0.2857	0.7857
C14H11O5N1	0.9898	0.0910057	0.3571	0.7857
C14H11O5N1S1	0.998975	0.0288207	0.3571	0.7857
C14H11O6N1	0.985223	0.109579	0.4286	0.7857
C14H11O6N1S1	0.506552	0.66184	0.4286	0.7857
C14H11O7N1	0.94147	0.218889	0.5	0.7857
C14H11O7N1S1	-0.945034	0.212057	0.5	0.7857
C14H11O8N1	0.828801	0.378047	0.5714	0.7857
C14H11O9N1	0.977846	0.134254	0.6429	0.7857
C14H12O1	0.792729	0.417319	0.0714	0.8571
C14H12O10	0.928388	0.242389	0.7143	0.8571
C14H12O2	0.952843	0.196285	0.1429	0.8571
C14H12O2N2	0.875011	0.321708	0.1429	0.8571
C14H12O3	-0.572902	0.611635	0.2143	0.8571
C14H12O3N2	0.93385	0.232854	0.2143	0.8571
C14H12O4	0.994418	0.0672992	0.2857	0.8571
C14H12O4N2	0.863273	0.336821	0.2857	0.8571
C14H12O4S1	-0.998996	0.0285287	0.2857	0.8571
C14H12O5	0.939497	0.222586	0.3571	0.8571
C14H12O5N2	0.993691	0.0715497	0.3571	0.8571
C14H12O5S1	-0.780767	0.429657	0.3571	0.8571
C14H12O6	0.905281	0.27932	0.4286	0.8571
C14H12O6N2	0.993523	0.0724941	0.4286	0.8571
C14H12O6N2S1	0.694256	0.511467	0.4286	0.8571
C14H12O6S1	-0.958558	0.18392	0.4286	0.8571
C14H12O7	0.0906415	0.942217	0.5	0.8571
C14H12O7N2	0.979681	0.128554	0.5	0.8571
C14H12O7S1	-0.929514	0.240453	0.5	0.8571
C14H12O8	0.999947	0.00654105	0.5714	0.8571
C14H12O8N2	0.835672	0.370156	0.5714	0.8571
C14H12O8S1	0.0654609	0.958296	0.5714	0.8571
C14H12O9	0.989599	0.091899	0.6429	0.8571
C14H13O2N1	0.933281	0.233865	0.1429	0.9286
C14H13O3N1	0.847928	0.3557	0.2143	0.9286
C14H13O4N1	-0.97332	0.147385	0.2857	0.9286
C14H13O4N1S1	0.230597	0.851864	0.2857	0.9286
C14H13O5N1	0.901648	0.284716	0.3571	0.9286
C14H13O5N1S1	-0.923824	0.250092	0.3571	0.9286
C14H13O6N1	0.990507	0.0877913	0.4286	0.9286
C14H13O6N1S1	0.187135	0.88016	0.4286	0.9286
C14H13O7N1	0.967398	0.163006	0.5	0.9286
C14H13O7N1S1	0.946782	0.208626	0.5	0.9286
C14H13O8N1	0.982213	0.120251	0.5714	0.9286
C14H13O8N1S1	-0.991716	0.0819984	0.5714	0.9286
C14H13O9N1	0.01785	0.988636	0.6429	0.9286
C14H14O10	0.779091	0.431362	0.7143	1
C14H14O2	0.0153719	0.990214	0.1429	1
C14H14O2N2	0.233927	0.849684	0.1429	1
C14H14O3	0.253363	0.836926	0.2143	1
C14H14O3N2	0.0286052	0.981787	0.2143	1
C14H14O3S1	0.388436	0.746031	0.2143	1
C14H14O4	-0.250454	0.83884	0.2857	1
C14H14O4N2	0.992381	0.0786381	0.2857	1
C14H14O4S1	-0.92828	0.242575	0.2857	1
C14H14O5	-0.494576	0.670647	0.3571	1
C14H14O5N2	0.995747	0.058734	0.3571	1
C14H14O5S1	-0.997064	0.0487987	0.3571	1
C14H14O6	0.967867	0.161823	0.4286	1
C14H14O6N2	0.956522	0.188416	0.4286	1
C14H14O6N2S1	-0.640592	0.557378	0.4286	1
C14H14O6S1	-0.884568	0.308907	0.4286	1
C14H14O7	0.901639	0.28473	0.5	1
C14H14O7N2	0.980695	0.125294	0.5	1
C14H14O7N2S1	0.835307	0.37058	0.5	1
C14H14O7S1	-0.84779	0.355866	0.5	1
C14H14O8	0.99331	0.0736823	0.5714	1
C14H14O8N2	0.997195	0.0476968	0.5714	1
C14H14O8S1	-0.287882	0.814098	0.5714	1
C14H14O9	0.764062	0.446404	0.6429	1
C14H14O9N2	0.847157	0.356625	0.6429	1
C14H14O9S1	0.999649	0.0168791	0.6429	1
C14H15O2N1	0.207595	0.866872	0.1429	1.0714
C14H15O3N1	0.714559	0.493255	0.2143	1.0714
C14H15O3N3S1	-0.987311	0.101522	0.2143	1.0714
C14H15O4N1	0.957669	0.185896	0.2857	1.0714
C14H15O4N1S1	-0.86463	0.335106	0.2857	1.0714
C14H15O5N1	0.998793	0.0312784	0.3571	1.0714
C14H15O5N1S1	-0.693566	0.512077	0.3571	1.0714
C14H15O6N1	0.991757	0.081795	0.4286	1.0714
C14H15O6N1S1	0.619313	0.574822	0.4286	1.0714
C14H15O7N1	0.988681	0.0958751	0.5	1.0714
C14H15O7N1S1	-0.128562	0.917928	0.5	1.0714
C14H15O8N1	0.90642	0.277609	0.5714	1.0714
C14H15O8N1S1	0.718887	0.489304	0.5714	1.0714
C14H15O9N1	0.839052	0.36622	0.6429	1.0714
C14H16O1	0.618714	0.575308	0.0714	1.1429
C14H16O10	-0.311023	0.798657	0.7143	1.1429
C14H16O11	-0.146561	0.906359	0.7857	1.1429
C14H16O2	-0.647277	0.551815	0.1429	1.1429
C14H16O2N2	0.627246	0.568364	0.1429	1.1429
C14H16O3	0.979785	0.128224	0.2143	1.1429
C14H16O3N2	-0.216082	0.861344	0.2143	1.1429
C14H16O3S1	-0.980007	0.127516	0.2143	1.1429
C14H16O4	0.955284	0.191098	0.2857	1.1429
C14H16O4N2	0.997558	0.0445033	0.2857	1.1429
C14H16O4N2S1	-0.170202	0.891116	0.2857	1.1429
C14H16O4S1	-0.940156	0.221358	0.2857	1.1429
C14H16O5	0.918495	0.25881	0.3571	1.1429
C14H16O5N2	-0.321757	0.791453	0.3571	1.1429
C14H16O5N2S1	-0.867872	0.330975	0.3571	1.1429
C14H16O5S1	-0.973985	0.145532	0.3571	1.1429
C14H16O6	-0.46012	0.695612	0.4286	1.1429
C14H16O6N2	0.989918	0.0904742	0.4286	1.1429
C14H16O6N2S1	-0.349046	0.773011	0.4286	1.1429
C14H16O6S1	-0.888498	0.303498	0.4286	1.1429
C14H16O7	-0.476072	0.68412	0.5	1.1429
C14H16O7N2	0.993559	0.0722917	0.5	1.1429
C14H16O7N2S1	-0.995378	0.0612337	0.5	1.1429
C14H16O7S1	-0.855278	0.346772	0.5	1.1429
C14H16O8	-0.167499	0.892862	0.5714	1.1429
C14H16O8N2	0.99445	0.0671002	0.5714	1.1429
C14H16O8S1	-0.668978	0.533464	0.5714	1.1429
C14H16O9	0.797623	0.412181	0.6429	1.1429
C14H16O9N2	0.67793	0.525755	0.6429	1.1429
C14H16O9S1	-0.608535	0.583515	0.6429	1.1429
C14H17O10N1	0.350179	0.772242	0.7143	1.2143
C14H17O2N1	0.944326	0.213432	0.1429	1.2143
C14H17O3N1	0.917778	0.259963	0.2143	1.2143
C14H17O4N1	0.998025	0.0400199	0.2857	1.2143
C14H17O5N1	0.98317	0.116962	0.3571	1.2143
C14H17O5N1S1	0.109748	0.929991	0.3571	1.2143
C14H17O6N1	0.958706	0.183588	0.4286	1.2143
C14H17O6N1S1	0.544054	0.633777	0.4286	1.2143
C14H17O7N1	0.985901	0.107028	0.5	1.2143
C14H17O7N1S1	0.951237	0.199627	0.5	1.2143
C14H17O8N1	0.969964	0.156426	0.5714	1.2143
C14H17O8N1S1	-0.364246	0.762654	0.5714	1.2143
C14H17O9N1	0.607078	0.584683	0.6429	1.2143
C14H18O1	-0.0515765	0.967151	0.0714	1.2857
C14H18O10	0.576362	0.608944	0.7143	1.2857
C14H18O2	0.567217	0.61604	0.1429	1.2857
C14H18O2N2	0.997595	0.0441617	0.1429	1.2857
C14H18O3	0.991275	0.0841601	0.2143	1.2857
C14H18O3N2	0.0187976	0.988032	0.2143	1.2857
C14H18O3S1	-0.978894	0.131029	0.2143	1.2857
C14H18O4	-0.985652	0.107973	0.2857	1.2857
C14H18O4N2	0.985333	0.10917	0.2857	1.2857
C14H18O4S1	0.501732	0.665393	0.2857	1.2857
C14H18O5	-0.936475	0.228135	0.3571	1.2857
C14H18O5N2	0.9938	0.0709282	0.3571	1.2857
C14H18O5N2S1	-0.959454	0.181906	0.3571	1.2857
C14H18O5S1	-0.669918	0.532659	0.3571	1.2857
C14H18O6	0.889347	0.302319	0.4286	1.2857
C14H18O6N2	0.974563	0.143898	0.4286	1.2857
C14H18O6N2S1	-0.294434	0.809738	0.4286	1.2857
C14H18O6S1	-0.845058	0.359131	0.4286	1.2857
C14H18O7	-0.986282	0.105569	0.5	1.2857
C14H18O7N2	0.996995	0.0493653	0.5	1.2857
C14H18O7N2S1	0.384614	0.748669	0.5	1.2857
C14H18O7S1	-0.879198	0.316158	0.5	1.2857
C14H18O8	0.992809	0.0763934	0.5714	1.2857
C14H18O8N2	0.900634	0.286206	0.5714	1.2857
C14H18O8S1	-0.646346	0.552592	0.5714	1.2857
C14H18O9	0.662784	0.53875	0.6429	1.2857
C14H18O9S1	-0.513841	0.656444	0.6429	1.2857
C14H19O2N1	-0.688674	0.516386	0.1429	1.3571
C14H19O3N1	0.546363	0.632023	0.2143	1.3571
C14H19O4N1	-0.0461358	0.970619	0.2857	1.3571
C14H19O5N1	0.995309	0.0616892	0.3571	1.3571
C14H19O6N1	0.942588	0.21677	0.4286	1.3571
C14H19O6N1S1	0.615629	0.577804	0.4286	1.3571
C14H19O7N1	0.996178	0.0556755	0.5	1.3571
C14H19O7N1S1	0.124084	0.920801	0.5	1.3571
C14H19O7N3	0.136134	0.913064	0.5	1.3571
C14H19O8N1	0.989057	0.0942688	0.5714	1.3571
C14H19O8N1S1	-0.824994	0.382357	0.5714	1.3571
C14H19O9N1	0.562797	0.619451	0.6429	1.3571
C14H20O1	0.425467	0.72022	0.0714	1.4286
C14H20O10	0.63817	0.559384	0.7143	1.4286
C14H20O10S1	0.810357	0.398547	0.7143	1.4286
C14H20O2	-0.61373	0.579336	0.1429	1.4286
C14H20O2N2	0.955119	0.191455	0.1429	1.4286
C14H20O3	-0.564492	0.618144	0.2143	1.4286
C14H20O3N2	0.893788	0.296075	0.2143	1.4286
C14H20O3S1	-0.957871	0.185447	0.2143	1.4286
C14H20O4	0.999837	0.0114897	0.2857	1.4286
C14H20O4N2	0.994797	0.0649684	0.2857	1.4286
C14H20O4S1	0.398674	0.738941	0.2857	1.4286
C14H20O5	0.5036	0.664017	0.3571	1.4286
C14H20O5N2	-0.472334	0.686823	0.3571	1.4286
C14H20O5S1	-0.941272	0.219263	0.3571	1.4286
C14H20O6	0.96408	0.171149	0.4286	1.4286
C14H20O6N2	0.999816	0.012216	0.4286	1.4286
C14H20O6S1	-0.813334	0.3953	0.4286	1.4286
C14H20O7	0.963946	0.17147	0.5	1.4286
C14H20O7S1	-0.908177	0.274949	0.5	1.4286
C14H20O7S2	-0.371959	0.757372	0.5	1.4286
C14H20O8	0.999004	0.0284208	0.5714	1.4286
C14H20O8N2	0.94732	0.20756	0.5714	1.4286
C14H20O8S1	-0.73318	0.476071	0.5714	1.4286
C14H20O9	0.983733	0.114986	0.6429	1.4286
C14H20O9S1	-0.90845	0.274533	0.6429	1.4286
C14H21O2N1	-0.960354	0.179862	0.1429	1.5
C14H21O4N1	0.979474	0.129208	0.2857	1.5
C14H21O5N1	0.902909	0.282855	0.3571	1.5
C14H21O5N1S1	0.645485	0.553311	0.3571	1.5
C14H21O5N3	0.630114	0.566016	0.3571	1.5
C14H21O6N1	0.966395	0.165509	0.4286	1.5
C14H21O6N1S1	0.166314	0.893627	0.4286	1.5
C14H21O6N3	-0.817729	0.390466	0.4286	1.5
C14H21O6N5S2	0.812909	0.395765	0.4286	1.5
C14H21O7N1	0.98657	0.104452	0.5	1.5
C14H21O7N1S1	-0.352595	0.770599	0.5	1.5
C14H21O7N3	0.659087	0.541886	0.5	1.5
C14H21O8N1	0.9963	0.0547805	0.5714	1.5
C14H21O8N1S1	0.0471244	0.969989	0.5714	1.5
C14H21O9N1	0.455971	0.698584	0.6429	1.5
C14H22O10	0.807751	0.401369	0.7143	1.5714
C14H22O10S1	0.311695	0.798207	0.7143	1.5714
C14H22O3S1	-0.9506	0.200939	0.2143	1.5714
C14H22O4S1	-0.984006	0.114014	0.2857	1.5714
C14H22O5	-0.477941	0.682767	0.3571	1.5714
C14H22O5S1	-0.999973	0.00471605	0.3571	1.5714
C14H22O6	0.991232	0.0843655	0.4286	1.5714
C14H22O6N2	0.992381	0.078635	0.4286	1.5714
C14H22O6S1	-0.974334	0.144546	0.4286	1.5714
C14H22O7	-0.252361	0.837586	0.5	1.5714
C14H22O7N2	0.999647	0.0169226	0.5	1.5714
C14H22O7S1	-0.318234	0.79382	0.5	1.5714
C14H22O8	0.999152	0.0262192	0.5714	1.5714
C14H22O8S1	0.790742	0.41939	0.5714	1.5714
C14H22O9	0.999979	0.00412485	0.6429	1.5714
C14H22O9S1	0.175165	0.887908	0.6429	1.5714
C14H23O4N1	0.267433	0.827649	0.2857	1.6429
C14H23O5N1	0.965302	0.168195	0.3571	1.6429
C14H23O6N1	0.937708	0.225887	0.4286	1.6429
C14H23O6N1S1	0.0833709	0.946863	0.4286	1.6429
C14H23O6N3	-0.954795	0.192149	0.4286	1.6429
C14H23O7N1	0.90387	0.281428	0.5	1.6429
C14H23O7N1S1	-0.270977	0.825306	0.5	1.6429
C14H23O8N1	0.974312	0.144609	0.5714	1.6429
C14H24O2	-0.892857	0.297395	0.1429	1.7143
C14H24O3	-0.968529	0.160139	0.2143	1.7143
C14H24O4	-0.997471	0.0452871	0.2857	1.7143
C14H24O4S1	-0.947268	0.207663	0.2857	1.7143
C14H24O5S1	-0.999888	0.00951804	0.3571	1.7143
C14H24O6	0.998101	0.0392369	0.4286	1.7143
C14H24O6S1	-0.863856	0.336085	0.4286	1.7143
C14H24O7	0.99746	0.0453839	0.5	1.7143
C14H24O7S1	0.199701	0.872006	0.5	1.7143
C14H24O8	0.999024	0.0281284	0.5714	1.7143
C14H24O8S1	0.429873	0.717117	0.5714	1.7143
C14H24O9	0.998911	0.0297149	0.6429	1.7143
C14H24O9S1	0.45117	0.702014	0.6429	1.7143
C14H26O10	-0.899229	0.288257	0.7143	1.8571
C14H26O4	-0.994838	0.0647136	0.2857	1.8571
C14H26O4S1	-0.776757	0.433727	0.2857	1.8571
C14H26O5	0.966342	0.16564	0.3571	1.8571
C14H26O5S1	-0.748845	0.461218	0.3571	1.8571
C14H26O6	0.999815	0.0122361	0.4286	1.8571
C14H26O6S1	-0.391717	0.743762	0.4286	1.8571
C14H26O7	-0.029823	0.981011	0.5	1.8571
C14H28O11S1	0.00352149	0.997758	0.7857	2
C14H28O3S1	0.22663	0.854458	0.2143	2
C14H28O4S1	0.279106	0.819924	0.2857	2
C14H30O4S1	-0.0334109	0.978726	0.2857	2.1429
C14H30O5S1	-0.801226	0.408363	0.3571	2.1429
C14H7O6N1	0.752293	0.457896	0.4286	0.5
C14H7O7N1	0.649313	0.550113	0.5	0.5
C14H8O3	-0.498139	0.668034	0.2143	0.5714
C14H8O4	0.406777	0.733305	0.2857	0.5714
C14H8O4N2	0.746823	0.463156	0.2857	0.5714
C14H8O4S1	-0.650225	0.54935	0.2857	0.5714
C14H8O5	-0.220928	0.858183	0.3571	0.5714
C14H8O5N2	0.725907	0.482841	0.3571	0.5714
C14H8O6	0.999957	0.00588206	0.4286	0.5714
C14H8O6N2	0.797204	0.412623	0.4286	0.5714
C14H8O6S1	0.365753	0.761623	0.4286	0.5714
C14H8O7	0.976099	0.139466	0.5	0.5714
C14H8O8	0.978425	0.132482	0.5714	0.5714
C14H8O9	0.981004	0.124285	0.6429	0.5714
C14H9O2N1	0.515902	0.654913	0.1429	0.6429
C14H9O3N1	0.609386	0.582832	0.2143	0.6429
C14H9O4N1	0.969205	0.158399	0.2857	0.6429
C14H9O5N1	0.971818	0.151497	0.3571	0.6429
C14H9O6N1	0.833897	0.372209	0.4286	0.6429
C14H9O7N1	0.965601	0.167464	0.5	0.6429
C14H9O7N1S1	0.833756	0.372372	0.5	0.6429
C14H9O8N1	0.970525	0.15495	0.5714	0.6429
C15H10O10	0.975713	0.140592	0.6667	0.6667
C15H10O2	0.702531	0.504106	0.1333	0.6667
C15H10O3	0.00492793	0.996863	0.2	0.6667
C15H10O4	0.209013	0.86595	0.2667	0.6667
C15H10O4N2	0.361722	0.764378	0.2667	0.6667
C15H10O5	0.882779	0.31134	0.3333	0.6667
C15H10O5N2	0.4565	0.698206	0.3333	0.6667
C15H10O5S1	-0.713566	0.494158	0.3333	0.6667
C15H10O6	0.976465	0.13839	0.4	0.6667
C15H10O6N2	0.927014	0.244732	0.4	0.6667
C15H10O6S1	0.154698	0.901119	0.4	0.6667
C15H10O7	0.915824	0.263078	0.4667	0.6667
C15H10O7N2	0.992919	0.075804	0.4667	0.6667
C15H10O7S1	-0.21973	0.858965	0.4667	0.6667
C15H10O8	0.999978	0.00419724	0.5333	0.6667
C15H10O8N2	0.67806	0.525642	0.5333	0.6667
C15H10O8S1	0.465851	0.691496	0.5333	0.6667
C15H10O9	0.993828	0.0707674	0.6	0.6667
C15H11O3N1	-0.459419	0.696115	0.2	0.7333
C15H11O4N1	-0.778995	0.431459	0.2667	0.7333
C15H11O5N1	0.303199	0.803891	0.3333	0.7333
C15H11O5N1S1	-0.697451	0.508635	0.3333	0.7333
C15H11O6N1	0.981687	0.122022	0.4	0.7333
C15H11O6N1S1	0.633986	0.562835	0.4	0.7333
C15H11O7N1	0.943701	0.214637	0.4667	0.7333
C15H11O7N1S1	0.959262	0.182339	0.4667	0.7333
C15H11O8N1	0.96588	0.16678	0.5333	0.7333
C15H11O9N1	0.683538	0.520881	0.6	0.7333
C15H12O10	0.998098	0.0392732	0.6667	0.8
C15H12O11	0.996886	0.050257	0.7333	0.8
C15H12O2	-0.518391	0.653063	0.1333	0.8
C15H12O3	-0.651855	0.547982	0.2	0.8
C15H12O3N2	0.395323	0.741266	0.2	0.8
C15H12O4	0.884088	0.309562	0.2667	0.8
C15H12O4N2	0.2309	0.851666	0.2667	0.8
C15H12O4S1	-0.997973	0.0405415	0.2667	0.8
C15H12O5	0.715926	0.49201	0.3333	0.8
C15H12O5N2	0.991226	0.0843959	0.3333	0.8
C15H12O5S1	-0.997489	0.0451239	0.3333	0.8
C15H12O6	0.965289	0.168226	0.4	0.8
C15H12O6N2	0.965837	0.166886	0.4	0.8
C15H12O6S1	0.381177	0.751038	0.4	0.8
C15H12O7	0.998877	0.0301802	0.4667	0.8
C15H12O7N2	0.950502	0.201139	0.4667	0.8
C15H12O7S1	-0.607052	0.584704	0.4667	0.8
C15H12O8	0.946607	0.208972	0.5333	0.8
C15H12O8N2	0.97856	0.132065	0.5333	0.8
C15H12O8S1	0.320699	0.792165	0.5333	0.8
C15H12O9	0.997128	0.0482569	0.6	0.8
C15H12O9N2	0.977915	0.134043	0.6	0.8
C15H12O9S1	0.984447	0.112425	0.6	0.8
C15H13O3N1	0.998012	0.040152	0.2	0.8667
C15H13O4N1	-0.37747	0.753588	0.2667	0.8667
C15H13O5N1	0.940175	0.221323	0.3333	0.8667
C15H13O5N1S1	-0.580812	0.605471	0.3333	0.8667
C15H13O6N1	0.805435	0.403863	0.4	0.8667
C15H13O6N1S1	-0.955376	0.190901	0.4	0.8667
C15H13O7N1	0.963078	0.173534	0.4667	0.8667
C15H13O7N1S1	0.3184	0.793709	0.4667	0.8667
C15H13O8N1	0.887761	0.30452	0.5333	0.8667
C15H13O8N1S1	0.27258	0.824246	0.5333	0.8667
C15H13O9N1	0.9899	0.0905569	0.6	0.8667
C15H14O10	0.945697	0.210762	0.6667	0.9333
C15H14O11	0.541723	0.635545	0.7333	0.9333
C15H14O2	-0.843316	0.3612	0.1333	0.9333
C15H14O3	0.573013	0.611549	0.2	0.9333
C15H14O3N2	0.950827	0.200471	0.2	0.9333
C15H14O4	0.102094	0.934891	0.2667	0.9333
C15H14O4N2	0.718031	0.490088	0.2667	0.9333
C15H14O4S1	-0.999729	0.0148305	0.2667	0.9333
C15H14O5	0.612605	0.580243	0.3333	0.9333
C15H14O5N2	0.991167	0.0846758	0.3333	0.9333
C15H14O5S1	-0.953403	0.195108	0.3333	0.9333
C15H14O6	0.961134	0.178073	0.4	0.9333
C15H14O6N2	0.649901	0.54962	0.4	0.9333
C15H14O6N2S1	-0.294078	0.809975	0.4	0.9333
C15H14O6S1	-0.958361	0.18436	0.4	0.9333
C15H14O7	0.896808	0.29176	0.4667	0.9333
C15H14O7N2	0.973266	0.147535	0.4667	0.9333
C15H14O7N2S1	-0.32628	0.78841	0.4667	0.9333
C15H14O7S1	-0.941824	0.218221	0.4667	0.9333
C15H14O8	-0.411201	0.730219	0.5333	0.9333
C15H14O8N2	0.977667	0.134797	0.5333	0.9333
C15H14O8S1	0.66389	0.537808	0.5333	0.9333
C15H14O9	0.999974	0.00457112	0.6	0.9333
C15H14O9N2	0.715607	0.4923	0.6	0.9333
C15H14O9S1	0.922964	0.251519	0.6	0.9333
C15H15O10N1	0.815816	0.392576	0.6667	1
C15H15O2N1	0.102157	0.934851	0.1333	1
C15H15O3N1	0.302647	0.804259	0.2	1
C15H15O3P1	-0.980354	0.126399	0.2	1
C15H15O4N1	0.931895	0.23631	0.2667	1
C15H15O5N1	-0.844457	0.359847	0.3333	1
C15H15O5N1S1	0.599403	0.59081	0.3333	1
C15H15O6N1	0.900796	0.285967	0.4	1
C15H15O6N1S1	-0.250701	0.838678	0.4	1
C15H15O7N1	0.99121	0.0844722	0.4667	1
C15H15O7N1S1	-0.962025	0.176007	0.4667	1
C15H15O8N1	0.997197	0.0476805	0.5333	1
C15H15O8N1S1	0.561273	0.620624	0.5333	1
C15H15O9N1	0.821715	0.386035	0.6	1
C15H16O10	0.92943	0.240599	0.6667	1.0667
C15H16O10N2	0.985996	0.106666	0.6667	1.0667
C15H16O10S1	0.50911	0.659949	0.6667	1.0667
C15H16O11	0.231619	0.851195	0.7333	1.0667
C15H16O2	-0.658443	0.54243	0.1333	1.0667
C15H16O2N2	0.520331	0.651617	0.1333	1.0667
C15H16O3	-0.512786	0.657227	0.2	1.0667
C15H16O3N2	0.997395	0.0459654	0.2	1.0667
C15H16O3S1	-0.932548	0.23516	0.2	1.0667
C15H16O4	0.415327	0.727334	0.2667	1.0667
C15H16O4N2	0.916409	0.262149	0.2667	1.0667
C15H16O4S1	-0.843546	0.360928	0.2667	1.0667
C15H16O5	0.825635	0.381634	0.3333	1.0667
C15H16O5N2	0.990778	0.0865252	0.3333	1.0667
C15H16O5S1	-0.997442	0.0455419	0.3333	1.0667
C15H16O6	-0.534774	0.640794	0.4	1.0667
C15H16O6N2	0.989233	0.0935037	0.4	1.0667
C15H16O6N2S1	0.34324	0.776951	0.4	1.0667
C15H16O6S1	-0.75597	0.454331	0.4	1.0667
C15H16O7	0.634395	0.562499	0.4667	1.0667
C15H16O7N2	0.997535	0.044709	0.4667	1.0667
C15H16O7N2S1	0.9439	0.214254	0.4667	1.0667
C15H16O7S1	-0.864752	0.334951	0.4667	1.0667
C15H16O8	0.997128	0.0482614	0.5333	1.0667
C15H16O8N2	0.997144	0.0481296	0.5333	1.0667
C15H16O8N2S1	0.928397	0.242375	0.5333	1.0667
C15H16O8S1	-0.798419	0.41134	0.5333	1.0667
C15H16O9	0.976837	0.137289	0.6	1.0667
C15H16O9N2	0.559704	0.62183	0.6	1.0667
C15H16O9S1	0.331595	0.784827	0.6	1.0667
C15H17O10N1	0.563763	0.618707	0.6667	1.1333
C15H17O3N1	0.316807	0.794778	0.2	1.1333
C15H17O4N1	0.974655	0.143636	0.2667	1.1333
C15H17O5N1	0.995463	0.0606634	0.3333	1.1333
C15H17O5N1S1	-0.774132	0.436373	0.3333	1.1333
C15H17O6N1	0.999676	0.0162143	0.4	1.1333
C15H17O6N1S1	-0.991327	0.0839049	0.4	1.1333
C15H17O7N1	0.979751	0.12833	0.4667	1.1333
C15H17O7N1S1	0.901819	0.284465	0.4667	1.1333
C15H17O8N1	0.974216	0.144881	0.5333	1.1333
C15H17O8N1S1	0.972798	0.148828	0.5333	1.1333
C15H17O9N1	0.961076	0.178207	0.6	1.1333
C15H17O9N1S1	-0.215702	0.861592	0.6	1.1333
C15H18O10	0.763262	0.447193	0.6667	1.2
C15H18O10S1	0.842364	0.362326	0.6667	1.2
C15H18O11	0.419977	0.724076	0.7333	1.2
C15H18O2	-0.417157	0.726053	0.1333	1.2
C15H18O2N2	0.267454	0.827635	0.1333	1.2
C15H18O3	0.397278	0.73991	0.2	1.2
C15H18O3N2	0.994088	0.0692598	0.2	1.2
C15H18O3S1	-0.991806	0.0815547	0.2	1.2
C15H18O4	-0.428999	0.717733	0.2667	1.2
C15H18O4N2	0.411382	0.730092	0.2667	1.2
C15H18O4S1	-0.988347	0.0972847	0.2667	1.2
C15H18O5	0.982814	0.118196	0.3333	1.2
C15H18O5N2	0.969926	0.156527	0.3333	1.2
C15H18O5S1	0.542551	0.634917	0.3333	1.2
C15H18O6	0.412011	0.729653	0.4	1.2
C15H18O6N2	-0.0368533	0.976533	0.4	1.2
C15H18O6N2S1	0.40634	0.73361	0.4	1.2
C15H18O6S1	0.725156	0.483535	0.4	1.2
C15H18O7	0.99415	0.0688931	0.4667	1.2
C15H18O7N2	0.99954	0.0193063	0.4667	1.2
C15H18O7N2S1	0.998327	0.0368353	0.4667	1.2
C15H18O7S1	-0.898527	0.289277	0.4667	1.2
C15H18O8	0.403878	0.735324	0.5333	1.2
C15H18O8N2	0.983343	0.116359	0.5333	1.2
C15H18O8S1	-0.645146	0.553593	0.5333	1.2
C15H18O9	-0.342707	0.777312	0.6	1.2
C15H18O9N2	0.906057	0.278155	0.6	1.2
C15H18O9S1	-0.450084	0.702788	0.6	1.2
C15H19O10N1	0.443959	0.707147	0.6667	1.2667
C15H19O2N1	-0.810814	0.398049	0.1333	1.2667
C15H19O3N1	-0.927521	0.243871	0.2	1.2667
C15H19O4N1	0.535145	0.640514	0.2667	1.2667
C15H19O5N1	0.99415	0.068897	0.3333	1.2667
C15H19O5N1S1	-0.194872	0.875142	0.3333	1.2667
C15H19O6N1	0.965842	0.166873	0.4	1.2667
C15H19O6N1S1	-0.793664	0.416342	0.4	1.2667
C15H19O7N1	0.981543	0.122502	0.4667	1.2667
C15H19O7N1S1	-0.84731	0.356441	0.4667	1.2667
C15H19O8N1	0.99831	0.0370182	0.5333	1.2667
C15H19O8N1S1	-0.331805	0.784685	0.5333	1.2667
C15H19O9N1	0.884576	0.308895	0.6	1.2667
C15H19O9N1S1	0.998522	0.034621	0.6	1.2667
C15H20O1	0.698092	0.508066	0.0667	1.3333
C15H20O10	-0.992302	0.0790439	0.6667	1.3333
C15H20O10S1	0.523478	0.649269	0.6667	1.3333
C15H20O11	0.824298	0.38314	0.7333	1.3333
C15H20O2	0.695282	0.510559	0.1333	1.3333
C15H20O3	0.978622	0.131874	0.2	1.3333
C15H20O3N2	0.696742	0.509264	0.2	1.3333
C15H20O3S1	-0.989127	0.0939653	0.2	1.3333
C15H20O4	0.639163	0.558562	0.2667	1.3333
C15H20O4N2	0.939922	0.221796	0.2667	1.3333
C15H20O4S1	0.424736	0.720734	0.2667	1.3333
C15H20O5	-0.996952	0.0497214	0.3333	1.3333
C15H20O5N2	0.989826	0.090888	0.3333	1.3333
C15H20O5S1	-0.956072	0.189395	0.3333	1.3333
C15H20O6	0.640913	0.557112	0.4	1.3333
C15H20O6N2	0.961196	0.177929	0.4	1.3333
C15H20O6S1	-0.798566	0.411185	0.4	1.3333
C15H20O7	0.990995	0.0855013	0.4667	1.3333
C15H20O7N2	0.994899	0.0643289	0.4667	1.3333
C15H20O7N2S1	0.851934	0.35086	0.4667	1.3333
C15H20O7S1	0.590731	0.597679	0.4667	1.3333
C15H20O8	0.996185	0.0556296	0.5333	1.3333
C15H20O8N2	0.996247	0.0551712	0.5333	1.3333
C15H20O8S1	-0.833981	0.372112	0.5333	1.3333
C15H20O9	0.988105	0.0982907	0.6	1.3333
C15H20O9N2	0.986875	0.103257	0.6	1.3333
C15H20O9S1	0.297285	0.807837	0.6	1.3333
C15H21O10N1	0.833608	0.372542	0.6667	1.4
C15H21O3N1	0.880866	0.313923	0.2	1.4
C15H21O4N1	0.9992	0.0254641	0.2667	1.4
C15H21O5N1	0.96228	0.175411	0.3333	1.4
C15H21O5N1S1	0.13495	0.913825	0.3333	1.4
C15H21O6N1	0.962193	0.175615	0.4	1.4
C15H21O6N1S1	-0.929676	0.240175	0.4	1.4
C15H21O7N1	0.972744	0.148975	0.4667	1.4
C15H21O7N1S1	0.895323	0.293889	0.4667	1.4
C15H21O7N3	0.883258	0.310689	0.4667	1.4
C15H21O8N1	0.996955	0.0496941	0.5333	1.4
C15H21O8N1S1	-0.610804	0.581692	0.5333	1.4
C15H21O9N1	0.979332	0.129658	0.6	1.4
C15H22O1	-0.728662	0.480285	0.0667	1.4667
C15H22O10	0.972809	0.148799	0.6667	1.4667
C15H22O10S1	0.68666	0.518152	0.6667	1.4667
C15H22O11	0.990283	0.0888212	0.7333	1.4667
C15H22O3S1	-0.931188	0.237547	0.2	1.4667
C15H22O4	-0.462043	0.694233	0.2667	1.4667
C15H22O4S1	-0.879892	0.315229	0.2667	1.4667
C15H22O5	-0.989227	0.0935311	0.3333	1.4667
C15H22O5N2	0.598682	0.591382	0.3333	1.4667
C15H22O5S1	-0.996813	0.0508395	0.3333	1.4667
C15H22O6	-0.0931876	0.940589	0.4	1.4667
C15H22O6S1	-0.945795	0.210571	0.4	1.4667
C15H22O7	0.998941	0.0293026	0.4667	1.4667
C15H22O7N2	0.962651	0.174541	0.4667	1.4667
C15H22O7S1	-0.991695	0.082106	0.4667	1.4667
C15H22O7S2	-0.433884	0.714286	0.4667	1.4667
C15H22O8	0.99863	0.0333317	0.5333	1.4667
C15H22O8N2	0.980656	0.125423	0.5333	1.4667
C15H22O8S1	0.96675	0.164626	0.5333	1.4667
C15H22O9	0.999048	0.0277845	0.6	1.4667
C15H22O9S1	0.828934	0.377896	0.6	1.4667
C15H23O3N1	0.722841	0.485672	0.2	1.5333
C15H23O4N1	-0.00861134	0.994518	0.2667	1.5333
C15H23O5N1	0.721791	0.486638	0.3333	1.5333
C15H23O5N1S1	0.0743656	0.952614	0.3333	1.5333
C15H23O6N1	0.983131	0.117099	0.4	1.5333
C15H23O6N1S1	-0.139305	0.911026	0.4	1.5333
C15H23O6N3	0.7515	0.458661	0.4	1.5333
C15H23O7N1	0.998964	0.0289799	0.4667	1.5333
C15H23O7N1S1	-0.990092	0.0896913	0.4667	1.5333
C15H23O8N1	0.999872	0.0101849	0.5333	1.5333
C15H23O8N1S1	-0.0960019	0.938789	0.5333	1.5333
C15H23O9N1	0.918235	0.259229	0.6	1.5333
C15H24O1	-0.981415	0.122929	0.0667	1.6
C15H24O10	0.967714	0.162209	0.6667	1.6
C15H24O10S1	0.0567651	0.963843	0.6667	1.6
C15H24O3S1	-0.5674	0.615899	0.2	1.6
C15H24O4	-0.671568	0.531242	0.2667	1.6
C15H24O4S1	0.0814901	0.948064	0.2667	1.6
C15H24O5	-0.987885	0.0991977	0.3333	1.6
C15H24O5S1	-0.997481	0.0451982	0.3333	1.6
C15H24O6	0.991228	0.0843822	0.4	1.6
C15H24O6N2	-0.45062	0.702406	0.4	1.6
C15H24O6S1	-0.999299	0.0238358	0.4	1.6
C15H24O7	0.0568197	0.963808	0.4667	1.6
C15H24O7N2	-0.144339	0.907789	0.4667	1.6
C15H24O7S1	-0.9971	0.048493	0.4667	1.6
C15H24O8	0.989211	0.0936019	0.5333	1.6
C15H24O8S1	0.61532	0.578054	0.5333	1.6
C15H24O9	0.991539	0.0828727	0.6	1.6
C15H24O9S1	0.901218	0.285349	0.6	1.6
C15H25O6N1	0.991123	0.0848888	0.4	1.6667
C15H25O6N1S1	0.124696	0.920409	0.4	1.6667
C15H25O7N1	-0.0656928	0.958149	0.4667	1.6667
C15H25O7N1S1	0.751842	0.458332	0.4667	1.6667
C15H25O8N1	0.870226	0.327945	0.5333	1.6667
C15H26O3	-0.885975	0.306981	0.2	1.7333
C15H26O4	-0.920632	0.255349	0.2667	1.7333
C15H26O4S1	-0.853801	0.348583	0.2667	1.7333
C15H26O5	-0.609336	0.582872	0.3333	1.7333
C15H26O5S1	-0.977417	0.135553	0.3333	1.7333
C15H26O6	0.651021	0.548682	0.4	1.7333
C15H26O6S1	-0.998501	0.0348599	0.4	1.7333
C15H26O7	0.999011	0.0283183	0.4667	1.7333
C15H26O7S1	-0.405148	0.73444	0.4667	1.7333
C15H26O8	0.998321	0.0368933	0.5333	1.7333
C15H26O8S1	0.852145	0.350602	0.5333	1.7333
C15H26O9	0.999973	0.0047101	0.6	1.7333
C15H28O4	-0.752258	0.45793	0.2667	1.8667
C15H28O5	-0.694407	0.511333	0.3333	1.8667
C15H28O5S1	-0.961034	0.178303	0.3333	1.8667
C15H28O6	-0.923081	0.251324	0.4	1.8667
C15H28O7	-0.619213	0.574904	0.4667	1.8667
C15H28O8	-0.670215	0.532404	0.5333	1.8667
C15H8O5	0.989758	0.091193	0.3333	0.5333
C15H8O6	-0.438354	0.711123	0.4	0.5333
C15H8O6S1	-0.0983077	0.937314	0.4	0.5333
C15H8O7	0.996149	0.0558865	0.4667	0.5333
C15H8O8	0.997877	0.0414912	0.5333	0.5333
C15H9O4N1	0.246564	0.841397	0.2667	0.6
C15H9O5N1	0.956401	0.18868	0.3333	0.6
C15H9O6N1	0.994208	0.0685536	0.4	0.6
C15H9O7N1	0.77873	0.431729	0.4667	0.6
C15H9O8N1	0.903331	0.282228	0.5333	0.6
C16H10O10	0.345056	0.77572	0.625	0.625
C16H10O3	0.670811	0.531893	0.1875	0.625
C16H10O4	-0.396713	0.740302	0.25	0.625
C16H10O5	0.959053	0.182809	0.3125	0.625
C16H10O6	0.981478	0.122718	0.375	0.625
C16H10O6N2	0.962908	0.173934	0.375	0.625
C16H10O7	0.910928	0.270735	0.4375	0.625
C16H10O7S1	0.583811	0.603122	0.4375	0.625
C16H10O8	0.994448	0.0671154	0.5	0.625
C16H10O9	0.999843	0.0112737	0.5625	0.625
C16H11O4N1	0.953693	0.194496	0.25	0.6875
C16H11O5N1	0.954184	0.193454	0.3125	0.6875
C16H11O6N1	0.870059	0.328161	0.375	0.6875
C16H11O7N1	0.96374	0.17196	0.4375	0.6875
C16H11O8N1	0.945845	0.210472	0.5	0.6875
C16H11O9N1	0.999616	0.0176541	0.5625	0.6875
C16H12O10	0.983101	0.117202	0.625	0.75
C16H12O11	0.994233	0.068401	0.6875	0.75
C16H12O2	-0.0033001	0.997899	0.125	0.75
C16H12O3	0.611467	0.58116	0.1875	0.75
C16H12O4	0.9898	0.0910035	0.25	0.75
C16H12O4N2	0.864614	0.335126	0.25	0.75
C16H12O5N2	-0.888277	0.303805	0.3125	0.75
C16H12O6	0.837205	0.368376	0.375	0.75
C16H12O6N2	0.998284	0.0373059	0.375	0.75
C16H12O6S1	-0.987892	0.0991657	0.375	0.75
C16H12O7	0.826145	0.381058	0.4375	0.75
C16H12O7N2	0.902946	0.2828	0.4375	0.75
C16H12O7S1	0.871405	0.326419	0.4375	0.75
C16H12O8	0.0356961	0.97727	0.5	0.75
C16H12O8N2	0.983771	0.114849	0.5	0.75
C16H12O8S1	0.938278	0.22484	0.5	0.75
C16H12O9	0.938603	0.224242	0.5625	0.75
C16H12O9N2	0.995922	0.0575106	0.5625	0.75
C16H12O9S1	0.571104	0.613031	0.5625	0.75
C16H13O10N1	0.918757	0.258389	0.625	0.8125
C16H13O3N1	-0.99905	0.0277559	0.1875	0.8125
C16H13O4N1	0.64638	0.552564	0.25	0.8125
C16H13O5N1	0.670778	0.531921	0.3125	0.8125
C16H13O6N1	0.667389	0.534824	0.375	0.8125
C16H13O7N1	0.966578	0.165055	0.4375	0.8125
C16H13O8N1	0.882129	0.31222	0.5	0.8125
C16H13O8N1S1	0.984807	0.111115	0.5	0.8125
C16H13O9N1	0.933028	0.234312	0.5625	0.8125
C16H14O10	0.974961	0.142762	0.625	0.875
C16H14O11	0.979834	0.128067	0.6875	0.875
C16H14O2	-0.98728	0.10165	0.125	0.875
C16H14O3	-0.977018	0.136749	0.1875	0.875
C16H14O4	-0.918254	0.259198	0.25	0.875
C16H14O4N2	-0.953651	0.194583	0.25	0.875
C16H14O5N2	0.834049	0.372033	0.3125	0.875
C16H14O5S1	-0.954762	0.192219	0.3125	0.875
C16H14O6	0.79781	0.411983	0.375	0.875
C16H14O6N2	0.769383	0.441127	0.375	0.875
C16H14O6S1	-0.621106	0.573367	0.375	0.875
C16H14O7	0.941293	0.219224	0.4375	0.875
C16H14O7N2	0.997601	0.0441059	0.4375	0.875
C16H14O7S1	-0.344021	0.776422	0.4375	0.875
C16H14O8	0.861782	0.338697	0.5	0.875
C16H14O8N2	0.994521	0.0666706	0.5	0.875
C16H14O8S1	-0.18008	0.884729	0.5	0.875
C16H14O9	-0.382468	0.750149	0.5625	0.875
C16H14O9N2	0.95046	0.201225	0.5625	0.875
C16H14O9S1	0.984738	0.111365	0.5625	0.875
C16H15O10N1	0.9713	0.15289	0.625	0.9375
C16H15O3N1	-0.89835	0.289534	0.1875	0.9375
C16H15O4N1	-0.616266	0.577289	0.25	0.9375
C16H15O5N1	0.0413458	0.973671	0.3125	0.9375
C16H15O6N1	0.993412	0.0731179	0.375	0.9375
C16H15O6N1S1	0.987131	0.102243	0.375	0.9375
C16H15O7N1	0.903067	0.28262	0.4375	0.9375
C16H15O7N1S1	0.734121	0.475189	0.4375	0.9375
C16H15O8N1	0.965655	0.16733	0.5	0.9375
C16H15O8N1S1	0.639991	0.557876	0.5	0.9375
C16H15O9N1	0.999103	0.026959	0.5625	0.9375
C16H16O10	0.871028	0.326907	0.625	1
C16H16O10N2	0.996257	0.0550971	0.625	1
C16H16O10S1	0.457888	0.697212	0.625	1
C16H16O11	0.629974	0.566131	0.6875	1
C16H16O12	0.134565	0.914073	0.75	1
C16H16O2	-0.900843	0.285899	0.125	1
C16H16O3	-0.995694	0.0590971	0.1875	1
C16H16O3N2	0.574203	0.610624	0.1875	1
C16H16O3S1	-0.999854	0.0108926	0.1875	1
C16H16O4	0.980435	0.126138	0.25	1
C16H16O4N2	0.989104	0.0940635	0.25	1
C16H16O4S1	-0.973591	0.146633	0.25	1
C16H16O5	-0.351765	0.771163	0.3125	1
C16H16O5N2	0.867446	0.33152	0.3125	1
C16H16O5S1	-0.961106	0.178137	0.3125	1
C16H16O6	0.868253	0.330486	0.375	1
C16H16O6N2	-0.0207436	0.986793	0.375	1
C16H16O6N2S1	0.971068	0.15351	0.375	1
C16H16O6S1	-0.977751	0.134543	0.375	1
C16H16O7	0.412291	0.729457	0.4375	1
C16H16O7N2	-0.293648	0.810261	0.4375	1
C16H16O7S1	-0.996849	0.0505511	0.4375	1
C16H16O8	0.999078	0.0273448	0.5	1
C16H16O8N2	0.987902	0.0991252	0.5	1
C16H16O8S1	0.290497	0.812358	0.5	1
C16H16O9	-0.986007	0.106626	0.5625	1
C16H16O9N2	0.973949	0.14563	0.5625	1
C16H16O9S1	0.114465	0.926969	0.5625	1
C16H17O10N1	0.996712	0.0516428	0.625	1.0625
C16H17O3N1	-0.886021	0.306918	0.1875	1.0625
C16H17O3P1	-0.932858	0.234614	0.1875	1.0625
C16H17O4N1	0.296066	0.80865	0.25	1.0625
C16H17O5N1	-0.0332686	0.978817	0.3125	1.0625
C16H17O5N1S1	0.974011	0.145458	0.3125	1.0625
C16H17O6N1	-0.45186	0.701521	0.375	1.0625
C16H17O6N1S1	0.891987	0.298622	0.375	1.0625
C16H17O7N1	0.969084	0.158713	0.4375	1.0625
C16H17O7N1S1	0.645092	0.553638	0.4375	1.0625
C16H17O8N1	0.982573	0.119025	0.5	1.0625
C16H17O8N1S1	-0.994936	0.064093	0.5	1.0625
C16H17O9N1	0.98577	0.107526	0.5625	1.0625
C16H17O9N1S1	0.949413	0.203358	0.5625	1.0625
C16H18O10	0.899357	0.28807	0.625	1.125
C16H18O10N2	0.955525	0.19058	0.625	1.125
C16H18O10S1	0.827059	0.380024	0.625	1.125
C16H18O11	0.709181	0.49813	0.6875	1.125
C16H18O11S1	-0.996907	0.0500836	0.6875	1.125
C16H18O12	0.281565	0.818293	0.75	1.125
C16H18O2	-0.938072	0.225219	0.125	1.125
C16H18O3	-0.626822	0.56871	0.1875	1.125
C16H18O3S1	-0.940007	0.221637	0.1875	1.125
C16H18O4	0.343424	0.776827	0.25	1.125
C16H18O4N2	0.984775	0.111233	0.25	1.125
C16H18O4S1	-0.904213	0.280917	0.25	1.125
C16H18O5	-0.298187	0.807236	0.3125	1.125
C16H18O5N2	0.412143	0.729561	0.3125	1.125
C16H18O5S1	-0.980487	0.125969	0.3125	1.125
C16H18O6	-0.227983	0.853574	0.375	1.125
C16H18O6N2	0.999686	0.0159431	0.375	1.125
C16H18O6N2S1	0.162322	0.896203	0.375	1.125
C16H18O6S1	-0.897603	0.290614	0.375	1.125
C16H18O7	0.962435	0.175047	0.4375	1.125
C16H18O7N2	0.989042	0.094333	0.4375	1.125
C16H18O7N2S1	-0.0942658	0.939899	0.4375	1.125
C16H18O7S1	-0.976309	0.138852	0.4375	1.125
C16H18O8	0.977477	0.13537	0.5	1.125
C16H18O8N2	0.978131	0.133385	0.5	1.125
C16H18O8N2S1	0.621589	0.572975	0.5	1.125
C16H18O8S1	-0.991497	0.0830802	0.5	1.125
C16H18O9	0.991297	0.0840526	0.5625	1.125
C16H18O9N2	0.997918	0.041087	0.5625	1.125
C16H18O9S1	-0.796837	0.41301	0.5625	1.125
C16H19O10N1	0.705837	0.501142	0.625	1.1875
C16H19O11N1	0.571136	0.613006	0.6875	1.1875
C16H19O3N1	-0.661331	0.539984	0.1875	1.1875
C16H19O4N1	0.998924	0.0295419	0.25	1.1875
C16H19O5N1	0.971782	0.151595	0.3125	1.1875
C16H19O5N1S1	-0.991791	0.0816291	0.3125	1.1875
C16H19O6N1	0.977246	0.136065	0.375	1.1875
C16H19O6N1S1	-0.948675	0.204849	0.375	1.1875
C16H19O7N1	0.974282	0.144693	0.4375	1.1875
C16H19O7N1S1	0.51189	0.657891	0.4375	1.1875
C16H19O8N1	0.976095	0.13948	0.5	1.1875
C16H19O8N1S1	-0.0378519	0.975897	0.5	1.1875
C16H19O9N1	0.991458	0.0832706	0.5625	1.1875
C16H19O9N1S1	-0.938296	0.224807	0.5625	1.1875
C16H20O10	0.984502	0.112227	0.625	1.25
C16H20O10N2	1	0.00052	0.625	1.25
C16H20O10S1	0.582677	0.60401	0.625	1.25
C16H20O11	0.954367	0.193063	0.6875	1.25
C16H20O11S1	-0.0434117	0.972355	0.6875	1.25
C16H20O12	0.2718	0.824762	0.75	1.25
C16H20O2	0.949839	0.202493	0.125	1.25
C16H20O3	-0.566676	0.616458	0.1875	1.25
C16H20O3N2	-0.429677	0.717255	0.1875	1.25
C16H20O4	0.347484	0.774072	0.25	1.25
C16H20O4N2	0.758058	0.452297	0.25	1.25
C16H20O4S1	0.557151	0.623789	0.25	1.25
C16H20O5	0.389048	0.745608	0.3125	1.25
C16H20O5N2	0.958374	0.18433	0.3125	1.25
C16H20O5N2S1	-0.32533	0.789049	0.3125	1.25
C16H20O5S1	-0.954378	0.193041	0.3125	1.25
C16H20O6	0.400642	0.737574	0.375	1.25
C16H20O6N2	0.95199	0.198068	0.375	1.25
C16H20O6N2S1	0.811765	0.397014	0.375	1.25
C16H20O6S1	-0.909984	0.272188	0.375	1.25
C16H20O7	0.963258	0.173108	0.4375	1.25
C16H20O7N2	0.999871	0.0102449	0.4375	1.25
C16H20O7N2S1	-0.00856514	0.994547	0.4375	1.25
C16H20O7S1	-0.924826	0.248421	0.4375	1.25
C16H20O8	-0.986773	0.103657	0.5	1.25
C16H20O8N2	0.992948	0.0756491	0.5	1.25
C16H20O8N2S1	0.975643	0.140795	0.5	1.25
C16H20O8S1	-0.976352	0.138725	0.5	1.25
C16H20O9	0.999975	0.00451596	0.5625	1.25
C16H20O9N2	0.880837	0.313961	0.5625	1.25
C16H20O9N2S1	0.707237	0.499883	0.5625	1.25
C16H20O9S1	-0.898424	0.289426	0.5625	1.25
C16H21O10N1	0.820523	0.387364	0.625	1.3125
C16H21O11N1	0.590572	0.597805	0.6875	1.3125
C16H21O3N1	0.936439	0.228201	0.1875	1.3125
C16H21O4N1	0.75069	0.459442	0.25	1.3125
C16H21O5N1	0.998874	0.0302154	0.3125	1.3125
C16H21O5N1S1	-0.549146	0.629906	0.3125	1.3125
C16H21O6N1	0.921882	0.253303	0.375	1.3125
C16H21O6N1S1	-0.984141	0.11353	0.375	1.3125
C16H21O7N1	0.939299	0.222953	0.4375	1.3125
C16H21O7N1S1	-0.472007	0.687059	0.4375	1.3125
C16H21O8N1	0.978691	0.131659	0.5	1.3125
C16H21O8N1S1	-0.0685669	0.956315	0.5	1.3125
C16H21O9N1	0.970343	0.155432	0.5625	1.3125
C16H21O9N1S1	0.14171	0.90948	0.5625	1.3125
C16H22O1	-0.88337	0.310538	0.0625	1.375
C16H22O10	-0.988556	0.0964066	0.625	1.375
C16H22O10S1	0.891657	0.299086	0.625	1.375
C16H22O11	0.841534	0.363306	0.6875	1.375
C16H22O11S1	0.601487	0.58915	0.6875	1.375
C16H22O2	-0.421293	0.723152	0.125	1.375
C16H22O3	0.493229	0.671633	0.1875	1.375
C16H22O3S1	0.252327	0.837608	0.1875	1.375
C16H22O4	0.486276	0.67671	0.25	1.375
C16H22O4N2	-0.428206	0.718292	0.25	1.375
C16H22O4S1	-0.927969	0.243107	0.25	1.375
C16H22O5	-0.625028	0.570175	0.3125	1.375
C16H22O5N2	-0.0228103	0.985477	0.3125	1.375
C16H22O5S1	-0.996735	0.0514611	0.3125	1.375
C16H22O6	0.984604	0.111855	0.375	1.375
C16H22O6N2	-0.47179	0.687216	0.375	1.375
C16H22O6N2S1	0.905391	0.279156	0.375	1.375
C16H22O6S1	-0.842371	0.362319	0.375	1.375
C16H22O7	0.973517	0.14684	0.4375	1.375
C16H22O7N2	0.999429	0.0215186	0.4375	1.375
C16H22O7N2S1	-0.934193	0.232242	0.4375	1.375
C16H22O7S1	-0.933108	0.234171	0.4375	1.375
C16H22O8	0.999464	0.020854	0.5	1.375
C16H22O8N2	0.988297	0.0974901	0.5	1.375
C16H22O8S1	-0.560423	0.621277	0.5	1.375
C16H22O9	-0.323777	0.790095	0.5625	1.375
C16H22O9N2	0.991351	0.0837905	0.5625	1.375
C16H22O9N2S1	0.577778	0.60784	0.5625	1.375
C16H22O9S1	0.953824	0.194217	0.5625	1.375
C16H23O10N1	0.708591	0.498663	0.625	1.4375
C16H23O4N1	0.916651	0.261764	0.25	1.4375
C16H23O5N1	0.991812	0.0815253	0.3125	1.4375
C16H23O5N1S1	-0.889734	0.30178	0.3125	1.4375
C16H23O6N1	0.999884	0.0096777	0.375	1.4375
C16H23O6N1S1	-0.939899	0.221838	0.375	1.4375
C16H23O7N1	0.960438	0.17967	0.4375	1.4375
C16H23O7N1S1	0.742115	0.467646	0.4375	1.4375
C16H23O7N3	0.470169	0.688386	0.4375	1.4375
C16H23O8N1	0.978155	0.133311	0.5	1.4375
C16H23O8N1S1	0.0678111	0.956797	0.5	1.4375
C16H23O9N1	0.953797	0.194276	0.5625	1.4375
C16H24O10	0.995048	0.0633799	0.625	1.5
C16H24O10S1	0.897938	0.29013	0.625	1.5
C16H24O11	0.847143	0.356641	0.6875	1.5
C16H24O2	-0.974903	0.142928	0.125	1.5
C16H24O3S1	-0.954651	0.192457	0.1875	1.5
C16H24O4	-0.969287	0.158187	0.25	1.5
C16H24O4S1	-0.928874	0.241555	0.25	1.5
C16H24O5	0.994991	0.0637489	0.3125	1.5
C16H24O5S1	-0.935818	0.229326	0.3125	1.5
C16H24O6	0.989989	0.0901579	0.375	1.5
C16H24O6N2	-0.750189	0.459925	0.375	1.5
C16H24O6S1	-0.820976	0.38686	0.375	1.5
C16H24O7	0.943954	0.214149	0.4375	1.5
C16H24O7N2	0.793047	0.416987	0.4375	1.5
C16H24O7S1	-0.896099	0.292779	0.4375	1.5
C16H24O8	0.979151	0.130224	0.5	1.5
C16H24O8N2	0.999685	0.0159777	0.5	1.5
C16H24O8S1	0.815551	0.392868	0.5	1.5
C16H24O9	0.110397	0.929575	0.5625	1.5
C16H24O9N2	0.939245	0.223054	0.5625	1.5
C16H24O9S1	0.996153	0.0558617	0.5625	1.5
C16H25O10N1	0.74101	0.468694	0.625	1.5625
C16H25O4N1	-0.938452	0.22452	0.25	1.5625
C16H25O5N1	0.997547	0.0445998	0.3125	1.5625
C16H25O6N1	0.934997	0.230803	0.375	1.5625
C16H25O6N1S1	-0.991504	0.0830456	0.375	1.5625
C16H25O6N3	0.575472	0.609637	0.375	1.5625
C16H25O6N5S2	0.646765	0.552243	0.375	1.5625
C16H25O7N1	0.923422	0.25076	0.4375	1.5625
C16H25O7N1S1	-0.474395	0.685334	0.4375	1.5625
C16H25O8N1	0.968511	0.160184	0.5	1.5625
C16H25O9N1	0.821927	0.385798	0.5625	1.5625
C16H26O10	0.999736	0.0146383	0.625	1.625
C16H26O10S1	0.74443	0.465443	0.625	1.625
C16H26O2	-0.991521	0.0829611	0.125	1.625
C16H26O3	0.0268182	0.982925	0.1875	1.625
C16H26O4	-0.498685	0.667633	0.25	1.625
C16H26O4S1	-0.495728	0.669802	0.25	1.625
C16H26O5	0.621383	0.573143	0.3125	1.625
C16H26O5S1	-0.977835	0.134288	0.3125	1.625
C16H26O6	0.997945	0.0408155	0.375	1.625
C16H26O6S1	-0.859964	0.340972	0.375	1.625
C16H26O7	0.998535	0.0344607	0.4375	1.625
C16H26O7N2	-0.937026	0.227134	0.4375	1.625
C16H26O7S1	-0.999905	0.00878171	0.4375	1.625
C16H26O8	-0.251999	0.837824	0.5	1.625
C16H26O8S1	0.994246	0.0683242	0.5	1.625
C16H26O9	0.990145	0.0894504	0.5625	1.625
C16H26O9S1	0.300424	0.805744	0.5625	1.625
C16H27O6N1	-0.846182	0.357791	0.375	1.6875
C16H27O7N1	0.683112	0.521252	0.4375	1.6875
C16H27O7N1S1	0.418491	0.725118	0.4375	1.6875
C16H27O8N1	0.896741	0.291856	0.5	1.6875
C16H28O3	-0.803177	0.406282	0.1875	1.75
C16H28O5	0.84344	0.361054	0.3125	1.75
C16H28O5S1	-0.905902	0.278388	0.3125	1.75
C16H28O6	0.945418	0.211308	0.375	1.75
C16H28O6S1	-0.983453	0.115973	0.375	1.75
C16H28O7	0.998614	0.0335269	0.4375	1.75
C16H28O7S1	-0.69606	0.509869	0.4375	1.75
C16H28O8	0.188983	0.878962	0.5	1.75
C16H28O9	0.935622	0.229679	0.5625	1.75
C16H30O11	-0.807222	0.40194	0.6875	1.875
C16H30O5	-0.975873	0.140129	0.3125	1.875
C16H30O6	0.877594	0.318294	0.375	1.875
C16H32O3S1	0.810863	0.397997	0.1875	2
C16H34O4S1	0.459208	0.696266	0.25	2.125
C16H34O5S1	0.288222	0.813872	0.3125	2.125
C16H34O6S1	0.825112	0.382224	0.375	2.125
C16H8O6	0.941787	0.218291	0.375	0.5
C16H8O7	0.989537	0.0921721	0.4375	0.5
C16H8O8	0.990636	0.0871893	0.5	0.5
C16H9O6N1	0.892328	0.298141	0.375	0.5625
C16H9O7N1	0.837774	0.367713	0.4375	0.5625
C16H9O8N1	0.991404	0.0835345	0.5	0.5625
C17H10O10	0.996055	0.0565699	0.5882	0.5882
C17H10O5	-0.293805	0.810157	0.2941	0.5882
C17H10O6	0.917121	0.261013	0.3529	0.5882
C17H10O7	-0.415024	0.727546	0.4118	0.5882
C17H10O8	0.932629	0.235017	0.4706	0.5882
C17H10O9	0.953176	0.195587	0.5294	0.5882
C17H11O4N1	0.665974	0.536032	0.2353	0.6471
C17H11O5N1	0.904855	0.279959	0.2941	0.6471
C17H11O6N1	0.973859	0.145884	0.3529	0.6471
C17H11O7N1	0.852389	0.350306	0.4118	0.6471
C17H11O8N1	0.918126	0.259403	0.4706	0.6471
C17H11O9N1	0.976829	0.137311	0.5294	0.6471
C17H12O10	0.964155	0.170967	0.5882	0.7059
C17H12O11	0.664611	0.537194	0.6471	0.7059
C17H12O3	0.759748	0.450645	0.1765	0.7059
C17H12O4	-0.699454	0.506854	0.2353	0.7059
C17H12O5	0.612175	0.580589	0.2941	0.7059
C17H12O5N2	-0.767644	0.442858	0.2941	0.7059
C17H12O6	0.859267	0.34184	0.3529	0.7059
C17H12O6N2	0.950637	0.200863	0.3529	0.7059
C17H12O7	0.877713	0.318136	0.4118	0.7059
C17H12O7N2	0.999636	0.0171889	0.4118	0.7059
C17H12O8	0.938322	0.224759	0.4706	0.7059
C17H12O8N2	0.864799	0.334891	0.4706	0.7059
C17H12O9	0.849717	0.353546	0.5294	0.7059
C17H13O10N1	0.760893	0.449523	0.5882	0.7647
C17H13O4N1	0.996557	0.0528404	0.2353	0.7647
C17H13O5N1	0.486522	0.67653	0.2941	0.7647
C17H13O6N1	0.845882	0.35815	0.3529	0.7647
C17H13O7N1	0.887158	0.305353	0.4118	0.7647
C17H13O8N1	0.988848	0.0951666	0.4706	0.7647
C17H13O9N1	0.936862	0.227433	0.5294	0.7647
C17H14O10	0.0394236	0.974896	0.5882	0.8235
C17H14O11	0.972621	0.149313	0.6471	0.8235
C17H14O12	0.894369	0.295251	0.7059	0.8235
C17H14O3	-0.951865	0.198328	0.1765	0.8235
C17H14O4	-0.989073	0.0941993	0.2353	0.8235
C17H14O4N2	-0.995572	0.0599318	0.2353	0.8235
C17H14O5N2	0.395998	0.740797	0.2941	0.8235
C17H14O6	0.752393	0.457799	0.3529	0.8235
C17H14O6N2	0.494758	0.670514	0.3529	0.8235
C17H14O6S1	-0.930709	0.238382	0.3529	0.8235
C17H14O7	0.888729	0.303178	0.4118	0.8235
C17H14O7N2	0.95715	0.187039	0.4118	0.8235
C17H14O7S1	-0.994294	0.0680428	0.4118	0.8235
C17H14O8	0.810165	0.398755	0.4706	0.8235
C17H14O8N2	0.974917	0.142887	0.4706	0.8235
C17H14O8S1	0.990176	0.0893101	0.4706	0.8235
C17H14O9	-0.0294658	0.981239	0.5294	0.8235
C17H14O9N2	0.898729	0.288983	0.5294	0.8235
C17H14O9S1	0.103832	0.933779	0.5294	0.8235
C17H15O10N1	0.999302	0.0237817	0.5882	0.8824
C17H15O11N1	0.401696	0.736842	0.6471	0.8824
C17H15O4N1	0.948355	0.205493	0.2353	0.8824
C17H15O5N1	-0.591808	0.596829	0.2941	0.8824
C17H15O6N1	0.978479	0.132316	0.3529	0.8824
C17H15O7N1	0.935297	0.230265	0.4118	0.8824
C17H15O8N1	0.999279	0.0241789	0.4706	0.8824
C17H15O9N1	0.880558	0.314337	0.5294	0.8824
C17H16O10	0.999941	0.00689138	0.5882	0.9412
C17H16O10N2	0.897614	0.290598	0.5882	0.9412
C17H16O10S1	-0.855181	0.346891	0.5882	0.9412
C17H16O11	-0.335325	0.782308	0.6471	0.9412
C17H16O12	0.184691	0.881743	0.7059	0.9412
C17H16O13	0.378458	0.752909	0.7647	0.9412
C17H16O3	-0.425922	0.719899	0.1765	0.9412
C17H16O4	-0.509031	0.660008	0.2353	0.9412
C17H16O5N2	-0.196311	0.874208	0.2941	0.9412
C17H16O5S1	-0.955634	0.190344	0.2941	0.9412
C17H16O6	-0.662685	0.538834	0.3529	0.9412
C17H16O6N2	0.0281828	0.982056	0.3529	0.9412
C17H16O6S1	-0.991041	0.085281	0.3529	0.9412
C17H16O7	0.904778	0.280073	0.4118	0.9412
C17H16O7N2	0.924619	0.248767	0.4118	0.9412
C17H16O7S1	-0.949519	0.203144	0.4118	0.9412
C17H16O8	-0.132841	0.91518	0.4706	0.9412
C17H16O8N2	0.964437	0.170291	0.4706	0.9412
C17H16O8S1	-0.569927	0.613943	0.4706	0.9412
C17H16O9	0.919469	0.257238	0.5294	0.9412
C17H16O9N2	0.983268	0.116622	0.5294	0.9412
C17H16O9S1	0.98804	0.0985598	0.5294	0.9412
C17H17O10N1	0.482359	0.67956	0.5882	1
C17H17O11N1	-0.827406	0.379631	0.6471	1
C17H17O4N1	0.982006	0.120952	0.2353	1
C17H17O5N1	-0.853139	0.349392	0.2941	1
C17H17O6N1	0.753594	0.456637	0.3529	1
C17H17O7N1	0.971224	0.153094	0.4118	1
C17H17O7N1S1	-0.284309	0.816472	0.4118	1
C17H17O8N1	0.954268	0.193273	0.4706	1
C17H17O8N1S1	0.16482	0.894591	0.4706	1
C17H17O9N1	0.991186	0.0845847	0.5294	1
C17H17O9N1S1	0.917567	0.260301	0.5294	1
C17H18O10	0.387666	0.746563	0.5882	1.0588
C17H18O10N2	0.941167	0.219461	0.5882	1.0588
C17H18O10S1	0.989216	0.0935775	0.5882	1.0588
C17H18O11	0.767032	0.443466	0.6471	1.0588
C17H18O12	-0.48822	0.675292	0.7059	1.0588
C17H18O13	-0.453831	0.700114	0.7647	1.0588
C17H18O2	-0.91367	0.266471	0.1176	1.0588
C17H18O3	-0.471164	0.687668	0.1765	1.0588
C17H18O4	-0.632395	0.564144	0.2353	1.0588
C17H18O5	0.146132	0.906635	0.2941	1.0588
C17H18O5N2	-0.983482	0.115871	0.2941	1.0588
C17H18O5S1	0.505715	0.662458	0.2941	1.0588
C17H18O6	-0.605554	0.585903	0.3529	1.0588
C17H18O6N2	0.92252	0.252252	0.3529	1.0588
C17H18O6S1	0.758876	0.451498	0.3529	1.0588
C17H18O7	0.841476	0.363374	0.4118	1.0588
C17H18O7N2	0.971404	0.152611	0.4118	1.0588
C17H18O7N2S1	-0.968152	0.1611	0.4118	1.0588
C17H18O7S1	-0.99144	0.0833552	0.4118	1.0588
C17H18O8	0.952487	0.197031	0.4706	1.0588
C17H18O8N2	0.988687	0.0958492	0.4706	1.0588
C17H18O8N2S1	0.26301	0.83057	0.4706	1.0588
C17H18O8S1	-0.990772	0.0865524	0.4706	1.0588
C17H18O9	-0.189835	0.87841	0.5294	1.0588
C17H18O9N2	0.991645	0.0823516	0.5294	1.0588
C17H18O9N2S1	-0.171524	0.890262	0.5294	1.0588
C17H18O9S1	0.612742	0.580133	0.5294	1.0588
C17H19O10N1	0.691402	0.513987	0.5882	1.1176
C17H19O11N1	0.0969454	0.938186	0.6471	1.1176
C17H19O3P1	-0.92013	0.256166	0.1765	1.1176
C17H19O4N1	0.957925	0.185329	0.2353	1.1176
C17H19O5N1	0.999426	0.0215768	0.2941	1.1176
C17H19O6N1	0.969456	0.157749	0.3529	1.1176
C17H19O7N1	0.975	0.142649	0.4118	1.1176
C17H19O7N1S1	-0.996859	0.0504683	0.4118	1.1176
C17H19O8N1	0.980689	0.125314	0.4706	1.1176
C17H19O8N1S1	0.679812	0.524123	0.4706	1.1176
C17H19O9N1	0.999829	0.0117762	0.5294	1.1176
C17H19O9N1S1	0.85146	0.351436	0.5294	1.1176
C17H20O10	0.989936	0.0903969	0.5882	1.1765
C17H20O10N2	0.584657	0.602458	0.5882	1.1765
C17H20O10S1	0.981591	0.122341	0.5882	1.1765
C17H20O11	-0.247237	0.840955	0.6471	1.1765
C17H20O11S1	-0.473027	0.686322	0.6471	1.1765
C17H20O12	0.67218	0.530716	0.7059	1.1765
C17H20O13	0.341895	0.777863	0.7647	1.1765
C17H20O2	-0.718704	0.489471	0.1176	1.1765
C17H20O3	0.307004	0.801347	0.1765	1.1765
C17H20O4	-0.98259	0.118965	0.2353	1.1765
C17H20O4N2	0.437404	0.711796	0.2353	1.1765
C17H20O5	-0.991407	0.0835177	0.2941	1.1765
C17H20O5N2	0.89202	0.298576	0.2941	1.1765
C17H20O5S1	-0.80382	0.405595	0.2941	1.1765
C17H20O6	-0.351051	0.771649	0.3529	1.1765
C17H20O6N2	0.741237	0.468479	0.3529	1.1765
C17H20O6S1	-0.996751	0.0513318	0.3529	1.1765
C17H20O7	-0.534644	0.640892	0.4118	1.1765
C17H20O7N2	0.848604	0.354887	0.4118	1.1765
C17H20O7N2S1	0.54238	0.635046	0.4118	1.1765
C17H20O7S1	-0.948112	0.205979	0.4118	1.1765
C17H20O8	0.630853	0.56541	0.4706	1.1765
C17H20O8N2	0.906812	0.277017	0.4706	1.1765
C17H20O8N2S1	0.808471	0.400591	0.4706	1.1765
C17H20O8S1	-0.998695	0.0325272	0.4706	1.1765
C17H20O9	0.996963	0.04963	0.5294	1.1765
C17H20O9N2	0.994599	0.0661979	0.5294	1.1765
C17H20O9N2S1	-0.663815	0.537873	0.5294	1.1765
C17H20O9S1	0.857461	0.344081	0.5294	1.1765
C17H21O10N1	0.883127	0.310867	0.5882	1.2353
C17H21O11N1	0.319076	0.793255	0.6471	1.2353
C17H21O2N3	0.626429	0.569032	0.1176	1.2353
C17H21O3N1	-0.963027	0.173654	0.1765	1.2353
C17H21O4N1	-0.564481	0.618153	0.2353	1.2353
C17H21O5N1	0.999827	0.0118439	0.2941	1.2353
C17H21O6N1	0.954999	0.191712	0.3529	1.2353
C17H21O6N1S1	0.415513	0.727204	0.3529	1.2353
C17H21O7N1	0.941997	0.217892	0.4118	1.2353
C17H21O7N1S1	0.688924	0.516167	0.4118	1.2353
C17H21O8N1	0.938444	0.224536	0.4706	1.2353
C17H21O8N1S1	-0.801444	0.408131	0.4706	1.2353
C17H21O9N1	0.999883	0.00972448	0.5294	1.2353
C17H21O9N1S1	0.45493	0.699328	0.5294	1.2353
C17H22O10	0.989438	0.0926099	0.5882	1.2941
C17H22O10N2	0.933454	0.233557	0.5882	1.2941
C17H22O10S1	0.802235	0.407288	0.5882	1.2941
C17H22O11	0.927009	0.244741	0.6471	1.2941
C17H22O11S1	0.176298	0.887175	0.6471	1.2941
C17H22O12	0.92162	0.253733	0.7059	1.2941
C17H22O2	-0.925647	0.247044	0.1176	1.2941
C17H22O3	-0.27698	0.821333	0.1765	1.2941
C17H22O4	-0.991617	0.0824898	0.2353	1.2941
C17H22O4N2	-0.869271	0.329178	0.2353	1.2941
C17H22O4S1	-0.935597	0.229725	0.2353	1.2941
C17H22O5	-0.60158	0.589077	0.2941	1.2941
C17H22O5N2	0.223999	0.856177	0.2941	1.2941
C17H22O5S1	-0.923544	0.250558	0.2941	1.2941
C17H22O6	0.876134	0.320228	0.3529	1.2941
C17H22O6N2	-0.00918536	0.994152	0.3529	1.2941
C17H22O6S1	0.723327	0.485224	0.3529	1.2941
C17H22O7	0.848667	0.354812	0.4118	1.2941
C17H22O7N2	-0.479209	0.681847	0.4118	1.2941
C17H22O7S1	-0.934814	0.231132	0.4118	1.2941
C17H22O8	0.937342	0.226558	0.4706	1.2941
C17H22O8N2	0.984561	0.112011	0.4706	1.2941
C17H22O8N2S1	0.999935	0.00725003	0.4706	1.2941
C17H22O8S1	-0.809415	0.399568	0.4706	1.2941
C17H22O9	0.997303	0.0467703	0.5294	1.2941
C17H22O9N2	0.984727	0.111409	0.5294	1.2941
C17H22O9N2S1	0.999861	0.0106014	0.5294	1.2941
C17H22O9S1	0.0299948	0.980902	0.5294	1.2941
C17H23O10N1	0.985806	0.107391	0.5882	1.3529
C17H23O11N1	0.489812	0.674131	0.6471	1.3529
C17H23O4N1	0.998358	0.0364826	0.2353	1.3529
C17H23O5N1	0.780324	0.430108	0.2941	1.3529
C17H23O6N1	0.998971	0.0288777	0.3529	1.3529
C17H23O6N1S1	-0.612714	0.580156	0.3529	1.3529
C17H23O7N1	0.995329	0.0615577	0.4118	1.3529
C17H23O7N1S1	-0.960507	0.179512	0.4118	1.3529
C17H23O8N1	0.959959	0.180763	0.4706	1.3529
C17H23O8N1S1	-0.987991	0.0987617	0.4706	1.3529
C17H23O9N1	0.999794	0.0129334	0.5294	1.3529
C17H23O9N1S1	-0.931286	0.237376	0.5294	1.3529
C17H23O9N3	0.576154	0.609106	0.5294	1.3529
C17H24O10	0.658369	0.542494	0.5882	1.4118
C17H24O10S1	0.967627	0.162431	0.5882	1.4118
C17H24O11	0.943613	0.214807	0.6471	1.4118
C17H24O11S1	-0.253794	0.836643	0.6471	1.4118
C17H24O12	0.639512	0.558273	0.7059	1.4118
C17H24O2	0.999392	0.0222026	0.1176	1.4118
C17H24O3	-0.503096	0.664388	0.1765	1.4118
C17H24O3S1	-0.985897	0.107043	0.1765	1.4118
C17H24O4	-0.822634	0.385008	0.2353	1.4118
C17H24O4S1	-0.931168	0.237582	0.2353	1.4118
C17H24O5	-0.97875	0.131477	0.2941	1.4118
C17H24O5S1	-0.997227	0.0474247	0.2941	1.4118
C17H24O6	-0.950422	0.201302	0.3529	1.4118
C17H24O6N2	-0.388059	0.746291	0.3529	1.4118
C17H24O6S1	-0.823738	0.383769	0.3529	1.4118
C17H24O7	-0.0789325	0.949698	0.4118	1.4118
C17H24O7N2	0.316813	0.794774	0.4118	1.4118
C17H24O7S1	-0.934413	0.23185	0.4118	1.4118
C17H24O8	0.999181	0.0257649	0.4706	1.4118
C17H24O8N2	0.999836	0.011541	0.4706	1.4118
C17H24O8S1	-0.17283	0.889417	0.4706	1.4118
C17H24O9	0.990958	0.0856743	0.5294	1.4118
C17H24O9N2	0.967188	0.163533	0.5294	1.4118
C17H24O9S1	0.393049	0.742841	0.5294	1.4118
C17H25O10N1	0.278487	0.820334	0.5882	1.4706
C17H25O11N1	-0.0184965	0.988224	0.6471	1.4706
C17H25O4N1	-0.729444	0.479558	0.2353	1.4706
C17H25O5N1	0.558179	0.623001	0.2941	1.4706
C17H25O6N1	0.865461	0.334052	0.3529	1.4706
C17H25O6N1S1	-0.889147	0.302597	0.3529	1.4706
C17H25O7N1	0.976202	0.139164	0.4118	1.4706
C17H25O7N1S1	-0.966293	0.16576	0.4118	1.4706
C17H25O8N1	0.964373	0.170445	0.4706	1.4706
C17H25O8N1S1	-0.508086	0.660707	0.4706	1.4706
C17H25O9N1	0.98638	0.105192	0.5294	1.4706
C17H25O9N1S1	-0.532056	0.642839	0.5294	1.4706
[truncated: 2,833 more rows]

## Sheet: Caldilineaceae
MolForm	r	p	O.C	H.C
C10H10O1	-0.99995	0.00638263	0.1	1
C10H10O1N2	0.358965	0.76626	0.1	1
C10H10O2	0.498109	0.668056	0.2	1
C10H10O2N2	0.998902	0.0298341	0.2	1
C10H10O2S1	0.787595	0.422652	0.2	1
C10H10O3	0.622146	0.572522	0.3	1
C10H10O3N2	-0.0304395	0.980619	0.3	1
C10H10O3S1	-0.786357	0.423929	0.3	1
C10H10O4	0.969727	0.157044	0.4	1
C10H10O4N2	-0.266756	0.828096	0.4	1
C10H10O4N2S1	0.108146	0.931017	0.4	1
C10H10O4S1	-0.148518	0.905099	0.4	1
C10H10O5N2	0.840756	0.364221	0.5	1
C10H10O5S1	-0.762422	0.44802	0.5	1
C10H10O6	0.57634	0.608961	0.6	1
C10H10O6N2	-0.726	0.482755	0.6	1
C10H10O6S1	0.985029	0.110298	0.6	1
C10H10O7	0.222458	0.857184	0.7	1
C10H10O7S1	-0.848967	0.35445	0.7	1
C10H11O2N1	0.865881	0.333517	0.2	1.1
C10H11O3N1	0.240563	0.845336	0.3	1.1
C10H11O3N1S1	-0.780039	0.430399	0.3	1.1
C10H11O4N1	-0.120329	0.92321	0.4	1.1
C10H11O4N1S1	0.68305	0.521306	0.4	1.1
C10H11O5N1	-0.375699	0.754805	0.5	1.1
C10H11O5N1S1	-0.458202	0.696987	0.5	1.1
C10H11O6N1	-0.974393	0.14438	0.6	1.1
C10H11O7N1	-0.690221	0.515027	0.7	1.1
C10H12O1	-0.95163	0.198815	0.1	1.2
C10H12O2	0.95868	0.183646	0.2	1.2
C10H12O2N2	0.690863	0.514461	0.2	1.2
C10H12O2S1	0.972597	0.149379	0.2	1.2
C10H12O3N2	0.213652	0.862928	0.3	1.2
C10H12O3S1	-0.989148	0.0938727	0.3	1.2
C10H12O4	-0.184294	0.882	0.4	1.2
C10H12O4N2	0.311698	0.798205	0.4	1.2
C10H12O4S1	-0.938112	0.225145	0.4	1.2
C10H12O5	0.202651	0.870089	0.5	1.2
C10H12O5N2	-0.0537718	0.965751	0.5	1.2
C10H12O5N2S1	-0.707191	0.499924	0.5	1.2
C10H12O5S1	-0.980544	0.125785	0.5	1.2
C10H12O6	-0.864149	0.335715	0.6	1.2
C10H12O6N2	-0.687184	0.517693	0.6	1.2
C10H12O6S1	-0.919279	0.257545	0.6	1.2
C10H12O7	0.0462494	0.970546	0.7	1.2
C10H12O7S1	0.00723076	0.995397	0.7	1.2
C10H13O1N1	0.968549	0.160088	0.1	1.3
C10H13O2N1	-0.851514	0.351369	0.2	1.3
C10H13O3N1	-0.738124	0.471424	0.3	1.3
C10H13O4N1	0.966362	0.16559	0.4	1.3
C10H13O4N1S1	0.999534	0.019443	0.4	1.3
C10H13O5N1	0.60438	0.586841	0.5	1.3
C10H13O5N1S1	-0.8306	0.375995	0.5	1.3
C10H13O6N1	0.814122	0.394437	0.6	1.3
C10H13O6N1S1	-0.999001	0.0284588	0.6	1.3
C10H13O7N1	0.0295027	0.981215	0.7	1.3
C10H14O1	0.686739	0.518083	0.1	1.4
C10H14O2	0.736572	0.472886	0.2	1.4
C10H14O2N2	0.392158	0.743458	0.2	1.4
C10H14O3	-0.792634	0.417419	0.3	1.4
C10H14O3N2	0.117368	0.925108	0.3	1.4
C10H14O3S1	-0.916211	0.262464	0.3	1.4
C10H14O4	0.960415	0.179723	0.4	1.4
C10H14O4N2	0.650381	0.549218	0.4	1.4
C10H14O4S1	-0.964374	0.170441	0.4	1.4
C10H14O5	0.571429	0.612779	0.5	1.4
C10H14O5N2	-0.0136532	0.991308	0.5	1.4
C10H14O5S1	-0.811335	0.397482	0.5	1.4
C10H14O6	0.609359	0.582854	0.6	1.4
C10H14O6S1	-0.936459	0.228165	0.6	1.4
C10H14O7	0.378792	0.752679	0.7	1.4
C10H14O7S1	-0.429686	0.717248	0.7	1.4
C10H15O1N1	0.917509	0.260394	0.1	1.5
C10H15O2N1	-0.200327	0.871599	0.2	1.5
C10H15O3N1	0.723409	0.485148	0.3	1.5
C10H15O4N1	0.928935	0.241451	0.4	1.5
C10H15O4N1S1	-0.974908	0.142915	0.4	1.5
C10H15O5N1	0.682732	0.521583	0.5	1.5
C10H15O5N1S1	0.137739	0.912033	0.5	1.5
C10H15O6N1	-0.0304136	0.980635	0.6	1.5
C10H15O7N1	-0.238699	0.846558	0.7	1.5
C10H15O8N1	-0.940975	0.219824	0.8	1.5
C10H16O1	-0.110458	0.929537	0.1	1.6
C10H16O2	-0.771163	0.439351	0.2	1.6
C10H16O3	0.586109	0.601318	0.3	1.6
C10H16O3S1	-0.934828	0.231107	0.3	1.6
C10H16O4N2	0.422707	0.72216	0.4	1.6
C10H16O4S1	-0.937854	0.22562	0.4	1.6
C10H16O5	0.773541	0.436967	0.5	1.6
C10H16O5N2	0.651554	0.548235	0.5	1.6
C10H16O5S1	-0.993746	0.071237	0.5	1.6
C10H16O6	0.667325	0.534878	0.6	1.6
C10H16O6S1	-0.818109	0.390045	0.6	1.6
C10H16O7	-0.119833	0.923528	0.7	1.6
C10H16O7S1	-0.380907	0.751223	0.7	1.6
C10H17O10N1S1	-0.00616608	0.996075	1	1.7
C10H17O3N1	-0.612704	0.580164	0.3	1.7
C10H17O4N1	0.160689	0.897257	0.4	1.7
C10H17O5N1	0.426735	0.719328	0.5	1.7
C10H17O7N1	0.7357	0.473707	0.7	1.7
C10H17O7N1S1	-0.112489	0.928235	0.7	1.7
C10H17O8N1S1	0.145676	0.906929	0.8	1.7
C10H18O2	0.961401	0.177455	0.2	1.8
C10H18O3	-0.867791	0.331079	0.3	1.8
C10H18O3S1	-0.450062	0.702804	0.3	1.8
C10H18O4	0.394679	0.741712	0.4	1.8
C10H18O4S1	-0.916781	0.261557	0.4	1.8
C10H18O5S1	-0.94702	0.208156	0.5	1.8
C10H18O6	0.343887	0.776513	0.6	1.8
C10H18O6S1	-0.690578	0.514713	0.6	1.8
C10H18O7	-0.968405	0.160456	0.7	1.8
C10H18O7S1	-0.195337	0.87484	0.7	1.8
C10H20O4	-0.374444	0.755667	0.4	2
C10H20O4S1	-0.962773	0.174252	0.4	2
C10H20O6S1	-0.640049	0.557828	0.6	2
C10H20O9S1	-0.604208	0.586979	0.9	2
C10H6O3	0.391738	0.743748	0.3	0.6
C10H6O4	0.535699	0.640096	0.4	0.6
C10H6O4S1	-0.615527	0.577887	0.4	0.6
C10H6O5	0.433882	0.714287	0.5	0.6
C10H6O5N2	0.185532	0.881199	0.5	0.6
C10H6O6	-0.862618	0.337646	0.6	0.6
C10H6O6N2	0.64055	0.557413	0.6	0.6
C10H6O7	0.970118	0.156023	0.7	0.6
C10H7O2N1	-0.636135	0.561064	0.2	0.7
C10H7O3N1	-0.500139	0.666565	0.3	0.7
C10H7O3N1S1	0.171914	0.89001	0.3	0.7
C10H7O4N1	-0.647517	0.551615	0.4	0.7
C10H7O4N1S1	0.328967	0.786599	0.4	0.7
C10H7O5N1	0.902138	0.283994	0.5	0.7
C10H7O5N1S1	0.985779	0.107494	0.5	0.7
C10H7O6N1	0.941317	0.219178	0.6	0.7
C10H8O1	0.815204	0.39325	0.1	0.8
C10H8O2	0.882074	0.312294	0.2	0.8
C10H8O2N2	0.309819	0.799463	0.2	0.8
C10H8O2S1	-0.825916	0.381317	0.2	0.8
C10H8O3	0.585931	0.601458	0.3	0.8
C10H8O3N2	-0.973559	0.146723	0.3	0.8
C10H8O3S1	-0.999984	0.00354855	0.3	0.8
C10H8O4	-0.212915	0.863409	0.4	0.8
C10H8O4N2	0.977734	0.134593	0.4	0.8
C10H8O4N2S1	-0.905978	0.278274	0.4	0.8
C10H8O4S1	0.0510864	0.967463	0.4	0.8
C10H8O5	0.398267	0.739223	0.5	0.8
C10H8O5N2	0.164234	0.89497	0.5	0.8
C10H8O5S1	-0.918745	0.258407	0.5	0.8
C10H8O6	0.0799529	0.949046	0.6	0.8
C10H8O6S1	-0.98102	0.124233	0.6	0.8
C10H8O7	0.370579	0.758319	0.7	0.8
C10H9O1N1	0.0266078	0.983059	0.1	0.9
C10H9O2N1	-0.996001	0.056954	0.2	0.9
C10H9O2N1S1	0.991909	0.0810395	0.2	0.9
C10H9O3N1	-0.974665	0.143606	0.3	0.9
C10H9O3N1S1	0.452271	0.701228	0.3	0.9
C10H9O4N1	-0.34692	0.774455	0.4	0.9
C10H9O4N1S1	-0.730753	0.478338	0.4	0.9
C10H9O5N1	-0.199969	0.871832	0.5	0.9
C10H9O5N1S1	-0.998857	0.030435	0.5	0.9
C10H9O6N1	-0.120513	0.923092	0.6	0.9
C10H9O7N1	-0.330544	0.785536	0.7	0.9
C11H10O1	-0.558011	0.623129	0.0909	0.9091
C11H10O2	0.392183	0.74344	0.1818	0.9091
C11H10O2N2	0.172304	0.889757	0.1818	0.9091
C11H10O2S1	-0.998954	0.0291265	0.1818	0.9091
C11H10O3	-0.198034	0.873089	0.2727	0.9091
C11H10O3N2	0.31635	0.795085	0.2727	0.9091
C11H10O3S1	-0.980413	0.126209	0.2727	0.9091
C11H10O4	-0.851526	0.351355	0.3636	0.9091
C11H10O4N2	0.541107	0.636011	0.3636	0.9091
C11H10O4N2S1	-0.992017	0.0804935	0.3636	0.9091
C11H10O4S1	-0.989071	0.0942065	0.3636	0.9091
C11H10O5	0.787977	0.422257	0.4545	0.9091
C11H10O5N2	0.0987446	0.937035	0.4545	0.9091
C11H10O5N2S1	-0.98801	0.098684	0.4545	0.9091
C11H10O5S1	-0.999149	0.0262635	0.4545	0.9091
C11H10O6	-0.865276	0.334286	0.5455	0.9091
C11H10O6N2	0.539451	0.637263	0.5455	0.9091
C11H10O6S1	-0.784869	0.42546	0.5455	0.9091
C11H10O7	-0.603741	0.587352	0.6364	0.9091
C11H10O7S1	-0.999992	0.00249397	0.6364	0.9091
C11H10O8	0.290065	0.812646	0.7273	0.9091
C11H11O2N1	0.733412	0.475853	0.1818	1
C11H11O3N1	0.867341	0.331655	0.2727	1
C11H11O3N1S1	0.0392687	0.974994	0.2727	1
C11H11O4N1	0.0625671	0.960143	0.3636	1
C11H11O4N1S1	-0.598769	0.591314	0.3636	1
C11H11O5N1	0.947957	0.20629	0.4545	1
C11H11O5N1S1	0.12413	0.920772	0.4545	1
C11H11O6N1	0.520256	0.651673	0.5455	1
C11H11O6N1S1	-0.389481	0.745309	0.5455	1
C11H11O7N1	0.123753	0.921014	0.6364	1
C11H11O8N1	0.997005	0.0492844	0.7273	1
C11H12O1	0.634766	0.562193	0.0909	1.0909
C11H12O2	0.375228	0.755129	0.1818	1.0909
C11H12O2N2	0.415917	0.726921	0.1818	1.0909
C11H12O2S1	0.9975	0.0450251	0.1818	1.0909
C11H12O3	0.350917	0.77174	0.2727	1.0909
C11H12O3N2	0.634679	0.562265	0.2727	1.0909
C11H12O3S1	-0.894206	0.295482	0.2727	1.0909
C11H12O4	-0.917421	0.260534	0.3636	1.0909
C11H12O4N2	-0.875462	0.321115	0.3636	1.0909
C11H12O4N2S1	-0.784581	0.425757	0.3636	1.0909
C11H12O4S1	-0.988026	0.098615	0.3636	1.0909
C11H12O5	0.277069	0.821274	0.4545	1.0909
C11H12O5N2	-0.321922	0.791342	0.4545	1.0909
C11H12O5S1	-0.981209	0.12361	0.4545	1.0909
C11H12O6	0.509517	0.659648	0.5455	1.0909
C11H12O6N2	0.258976	0.83323	0.5455	1.0909
C11H12O6S1	-0.896587	0.292078	0.5455	1.0909
C11H12O7	0.644246	0.554343	0.6364	1.0909
C11H12O7S1	-0.98863	0.0960941	0.6364	1.0909
C11H12O8	-0.234094	0.849575	0.7273	1.0909
C11H13O1N1	-0.697239	0.508823	0.0909	1.1818
C11H13O2N1	0.822686	0.384949	0.1818	1.1818
C11H13O3N1	0.570132	0.613784	0.2727	1.1818
C11H13O4N1	-0.92344	0.250731	0.3636	1.1818
C11H13O4N1S1	0.0500841	0.968102	0.3636	1.1818
C11H13O5N1	0.432971	0.71493	0.4545	1.1818
C11H13O5N1S1	-0.987371	0.101283	0.4545	1.1818
C11H13O6N1	0.0676972	0.95687	0.5455	1.1818
C11H13O6N1S1	-0.549072	0.629963	0.5455	1.1818
C11H13O7N1	0.322262	0.791114	0.6364	1.1818
C11H13O7N1S1	0.202184	0.870392	0.6364	1.1818
C11H13O8N1	-0.0924026	0.941091	0.7273	1.1818
C11H14O1	-0.845635	0.358444	0.0909	1.2727
C11H14O2	0.642802	0.555544	0.1818	1.2727
C11H14O2N2	0.330519	0.785553	0.1818	1.2727
C11H14O2S1	-0.62619	0.569227	0.1818	1.2727
C11H14O3N2	0.795885	0.414012	0.2727	1.2727
C11H14O3S1	-0.988614	0.0961594	0.2727	1.2727
C11H14O4	-0.83602	0.369754	0.3636	1.2727
C11H14O4N2	0.733275	0.475982	0.3636	1.2727
C11H14O4N2S1	0.653292	0.546775	0.3636	1.2727
C11H14O4S1	-0.60182	0.588885	0.3636	1.2727
C11H14O5	0.866992	0.332101	0.4545	1.2727
C11H14O5N2	0.608272	0.583726	0.4545	1.2727
C11H14O5N2S1	-0.992465	0.078199	0.4545	1.2727
C11H14O5S1	-0.952874	0.196222	0.4545	1.2727
C11H14O6	0.765907	0.44458	0.5455	1.2727
C11H14O6N2	0.0501973	0.96803	0.5455	1.2727
C11H14O6S1	-0.33961	0.77941	0.5455	1.2727
C11H14O7	0.430826	0.716445	0.6364	1.2727
C11H14O7S1	0.0451347	0.971257	0.6364	1.2727
C11H14O8	0.0870627	0.944504	0.7273	1.2727
C11H15O1N1	-0.188339	0.879379	0.0909	1.3636
C11H15O2N1	0.634694	0.562252	0.1818	1.3636
C11H15O3N1	0.68701	0.517845	0.2727	1.3636
C11H15O4N1	0.718947	0.489249	0.3636	1.3636
C11H15O4N1S1	0.249599	0.839402	0.3636	1.3636
C11H15O5N1	0.844103	0.360268	0.4545	1.3636
C11H15O5N1S1	-0.766509	0.443985	0.4545	1.3636
C11H15O6N1	0.74894	0.461126	0.5455	1.3636
C11H15O6N1S1	-0.386046	0.747681	0.5455	1.3636
C11H15O7N1	0.497328	0.668629	0.6364	1.3636
C11H15O7P1	-0.740039	0.469614	0.6364	1.3636
C11H16O1	0.0695922	0.95566	0.0909	1.4545
C11H16O2	0.942241	0.217429	0.1818	1.4545
C11H16O2N2	0.588824	0.599182	0.1818	1.4545
C11H16O3	-0.736464	0.472988	0.2727	1.4545
C11H16O3N2	0.989005	0.0944931	0.2727	1.4545
C11H16O3S1	-0.92222	0.252747	0.2727	1.4545
C11H16O4	-0.854176	0.348124	0.3636	1.4545
C11H16O4N2	0.447426	0.704682	0.3636	1.4545
C11H16O4S1	0.141223	0.909793	0.3636	1.4545
C11H16O5	0.950414	0.20132	0.4545	1.4545
C11H16O5N2	0.996018	0.0568296	0.4545	1.4545
C11H16O5S1	-0.411573	0.729959	0.4545	1.4545
C11H16O5S2	-0.0525285	0.966544	0.4545	1.4545
C11H16O6	0.959715	0.181316	0.5455	1.4545
C11H16O6N2	0.250989	0.838489	0.5455	1.4545
C11H16O6S1	-0.208698	0.866155	0.5455	1.4545
C11H16O7	0.679521	0.524375	0.6364	1.4545
C11H16O7S1	0.04278	0.972757	0.6364	1.4545
C11H16O8	0.08991	0.942684	0.7273	1.4545
C11H16O8S1	-0.578233	0.607485	0.7273	1.4545
C11H17O2N1	0.45081	0.702271	0.1818	1.5455
C11H17O3N1	0.63609	0.561102	0.2727	1.5455
C11H17O4N1	0.497533	0.668479	0.3636	1.5455
C11H17O5N1	0.913853	0.266185	0.4545	1.5455
C11H17O5N1S1	-0.799948	0.409721	0.4545	1.5455
C11H17O6N1	0.109311	0.930271	0.5455	1.5455
C11H17O7N1	0.107714	0.931294	0.6364	1.5455
C11H18O1	0.944369	0.213348	0.0909	1.6364
C11H18O2	-0.762176	0.448262	0.1818	1.6364
C11H18O3	-0.749418	0.460666	0.2727	1.6364
C11H18O3N2	-0.991638	0.0823875	0.2727	1.6364
C11H18O4	0.432528	0.715243	0.3636	1.6364
C11H18O4N2	-0.849596	0.353692	0.3636	1.6364
C11H18O4S1	-0.660233	0.540915	0.3636	1.6364
C11H18O5	-0.826292	0.380893	0.4545	1.6364
C11H18O5S1	-0.626367	0.569082	0.4545	1.6364
C11H18O6	0.90309	0.282586	0.5455	1.6364
C11H18O6S1	-0.887243	0.305235	0.5455	1.6364
C11H18O7	0.709962	0.497424	0.6364	1.6364
C11H18O7S1	0.0957313	0.938962	0.6364	1.6364
C11H18O8	0.388405	0.746052	0.7273	1.6364
C11H19O3N1	-0.713926	0.49383	0.2727	1.7273
C11H19O4N1	-0.0189082	0.987962	0.3636	1.7273
C11H19O5N1	0.902557	0.283375	0.4545	1.7273
C11H19O6N1	0.525114	0.648045	0.5455	1.7273
C11H20O2	-0.67496	0.528321	0.1818	1.8182
C11H20O4	-0.851607	0.351257	0.3636	1.8182
C11H20O4S1	-0.999981	0.00395581	0.3636	1.8182
C11H20O5S1	-0.986687	0.103997	0.4545	1.8182
C11H20O6	0.935807	0.229346	0.5455	1.8182
C11H20O6S1	-0.942976	0.216027	0.5455	1.8182
C11H20O7	-0.947991	0.206222	0.6364	1.8182
C11H20O7S1	-0.234761	0.849138	0.6364	1.8182
C11H22O4	-0.357244	0.767433	0.3636	2
C11H6O4	0.333045	0.783848	0.3636	0.5455
C11H6O5	0.681187	0.522928	0.4545	0.5455
C11H6O6	0.864301	0.335522	0.5455	0.5455
C11H6O6S1	0.863746	0.336224	0.5455	0.5455
C11H6O7	0.969373	0.157965	0.6364	0.5455
C11H7O4N1	0.2519	0.837889	0.3636	0.6364
C11H7O5N1	0.916714	0.261663	0.4545	0.6364
C11H7O6N1	0.998274	0.0374106	0.5455	0.6364
C11H7O7N1	0.36135	0.764632	0.6364	0.6364
C11H8O2	0.364923	0.76219	0.1818	0.7273
C11H8O2N2	-0.865445	0.334071	0.1818	0.7273
C11H8O3	0.714926	0.492921	0.2727	0.7273
C11H8O3N2	0.995217	0.0622928	0.2727	0.7273
C11H8O3S1	-0.350399	0.772092	0.2727	0.7273
C11H8O4	0.812569	0.396136	0.3636	0.7273
C11H8O4N2	0.106281	0.932211	0.3636	0.7273
C11H8O4S1	-0.45143	0.701828	0.3636	0.7273
C11H8O5	0.510091	0.659223	0.4545	0.7273
C11H8O5N2	0.648997	0.550377	0.4545	0.7273
C11H8O5S1	-0.602446	0.588386	0.4545	0.7273
C11H8O6	0.473897	0.685694	0.5455	0.7273
C11H8O6N2	0.398886	0.738794	0.5455	0.7273
C11H8O6S1	-0.898348	0.289536	0.5455	0.7273
C11H8O7	0.736896	0.472581	0.6364	0.7273
C11H9O2N1	0.270742	0.825462	0.1818	0.8182
C11H9O3N1	0.772307	0.438205	0.2727	0.8182
C11H9O3N1S1	0.966121	0.166185	0.2727	0.8182
C11H9O4N1	0.85098	0.352017	0.3636	0.8182
C11H9O4N1S1	0.231019	0.851588	0.3636	0.8182
C11H9O5N1	0.922891	0.251639	0.4545	0.8182
C11H9O5N1S1	0.717698	0.490391	0.4545	0.8182
C11H9O6N1	0.888844	0.303018	0.5455	0.8182
C11H9O7N1	0.406265	0.733662	0.6364	0.8182
C12H10O2	0.209846	0.865407	0.1667	0.8333
C12H10O2N2	-0.898373	0.2895	0.1667	0.8333
C12H10O3	0.955171	0.191343	0.25	0.8333
C12H10O3N2	-0.243599	0.843344	0.25	0.8333
C12H10O3S1	-0.995822	0.0582143	0.25	0.8333
C12H10O4	0.9593	0.182254	0.3333	0.8333
C12H10O4N2	0.61961	0.574582	0.3333	0.8333
C12H10O4N2S1	-0.958231	0.184649	0.3333	0.8333
C12H10O4S1	-0.763869	0.446595	0.3333	0.8333
C12H10O5	0.923313	0.25094	0.4167	0.8333
C12H10O5N2	0.844266	0.360073	0.4167	0.8333
C12H10O5N2S1	0.648927	0.550436	0.4167	0.8333
C12H10O5S1	-0.99169	0.0821295	0.4167	0.8333
C12H10O6	-0.164698	0.89467	0.5	0.8333
C12H10O6N2	0.951239	0.199625	0.5	0.8333
C12H10O6S1	0.587912	0.5999	0.5	0.8333
C12H10O7	0.710091	0.497307	0.5833	0.8333
C12H10O7N2	-0.997247	0.0472535	0.5833	0.8333
C12H10O7S1	-0.84433	0.359997	0.5833	0.8333
C12H10O8	-0.335744	0.782025	0.6667	0.8333
C12H11O2N1	-0.540027	0.636828	0.1667	0.9167
C12H11O3N1	-0.827127	0.379948	0.25	0.9167
C12H11O3N1S1	-0.4136	0.728542	0.25	0.9167
C12H11O4N1	0.850827	0.352203	0.3333	0.9167
C12H11O4N1S1	0.996359	0.0543405	0.3333	0.9167
C12H11O5N1	0.925164	0.247855	0.4167	0.9167
C12H11O5N1S1	0.441591	0.708828	0.4167	0.9167
C12H11O6N1	0.492775	0.671965	0.5	0.9167
C12H11O6N1S1	0.375457	0.754972	0.5	0.9167
C12H11O7N1	-0.324121	0.789863	0.5833	0.9167
C12H11O8N1	-0.521385	0.650831	0.6667	0.9167
C12H12O1	-0.606746	0.584949	0.0833	1
C12H12O2	0.712934	0.494732	0.1667	1
C12H12O2N2	-0.456942	0.69789	0.1667	1
C12H12O3	0.785939	0.42436	0.25	1
C12H12O3N2	0.842157	0.362571	0.25	1
C12H12O3S1	-0.121697	0.922333	0.25	1
C12H12O3S2	0.835416	0.370453	0.25	1
C12H12O4	0.459144	0.696312	0.3333	1
C12H12O4N2	-0.959464	0.181884	0.3333	1
C12H12O4N2S1	-0.552328	0.627479	0.3333	1
C12H12O4S1	-0.972692	0.14912	0.3333	1
C12H12O5	0.948069	0.206066	0.4167	1
C12H12O5N2	0.669985	0.532601	0.4167	1
C12H12O5N2S1	-0.875869	0.320578	0.4167	1
C12H12O5S1	0.248451	0.840157	0.4167	1
C12H12O6	0.820431	0.387467	0.5	1
C12H12O6N2	0.440562	0.709558	0.5	1
C12H12O6S1	-0.994305	0.067975	0.5	1
C12H12O7	0.574046	0.610746	0.5833	1
C12H12O7S1	-0.999675	0.0162285	0.5833	1
C12H12O8	0.0972446	0.937994	0.6667	1
C12H12O8S1	-0.898971	0.288632	0.6667	1
C12H13O2N1	0.573383	0.611262	0.1667	1.0833
C12H13O3N1	0.283586	0.816952	0.25	1.0833
C12H13O4N1	0.777983	0.432486	0.3333	1.0833
C12H13O4N1S1	0.362283	0.763995	0.3333	1.0833
C12H13O5N1	0.874245	0.322714	0.4167	1.0833
C12H13O5N1S1	0.0942257	0.939925	0.4167	1.0833
C12H13O6N1	0.836169	0.36958	0.5	1.0833
C12H13O6N1S1	0.912694	0.267996	0.5	1.0833
C12H13O7N1	0.618327	0.575622	0.5833	1.0833
C12H13O7N1S1	0.108371	0.930873	0.5833	1.0833
C12H13O8N1	-0.497334	0.668625	0.6667	1.0833
C12H14O1	0.540765	0.63627	0.0833	1.1667
C12H14O2	-0.71043	0.497001	0.1667	1.1667
C12H14O2N2	0.675634	0.52774	0.1667	1.1667
C12H14O3	0.437054	0.712044	0.25	1.1667
C12H14O3N2	-0.0569964	0.963695	0.25	1.1667
C12H14O3S1	-0.954891	0.191943	0.25	1.1667
C12H14O4N2	0.72193	0.486511	0.3333	1.1667
C12H14O4N2S1	0.127162	0.918826	0.3333	1.1667
C12H14O4S1	-0.971236	0.15306	0.3333	1.1667
C12H14O5	-0.859023	0.342143	0.4167	1.1667
C12H14O5N2	0.668814	0.533605	0.4167	1.1667
C12H14O5S1	-0.101794	0.935084	0.4167	1.1667
C12H14O6N2	0.21334	0.863131	0.5	1.1667
C12H14O6N2S1	-0.548133	0.630678	0.5	1.1667
C12H14O6S1	-0.995937	0.0574052	0.5	1.1667
C12H14O7	-0.785372	0.424944	0.5833	1.1667
C12H14O7S1	-0.987711	0.0999083	0.5833	1.1667
C12H14O8	0.23007	0.852209	0.6667	1.1667
C12H14O8S1	-0.970344	0.155428	0.6667	1.1667
C12H14O9	-0.194233	0.875557	0.75	1.1667
C12H15O1N1	0.707073	0.50003	0.0833	1.25
C12H15O2N1	0.461485	0.694634	0.1667	1.25
C12H15O3N1	0.974187	0.144961	0.25	1.25
C12H15O4N1	0.857271	0.344317	0.3333	1.25
C12H15O4N1S1	0.560581	0.621156	0.3333	1.25
C12H15O5N1	0.791155	0.418961	0.4167	1.25
C12H15O5N1S1	-0.0610768	0.961093	0.4167	1.25
C12H15O6N1	0.94944	0.203304	0.5	1.25
C12H15O6N1S1	-0.400764	0.737489	0.5	1.25
C12H15O7N1	0.482919	0.679153	0.5833	1.25
C12H15O7N1S1	-0.814861	0.393626	0.5833	1.25
C12H15O8N1	0.0333897	0.97874	0.6667	1.25
C12H16O1	-0.879535	0.315708	0.0833	1.3333
C12H16O2	-0.916107	0.262628	0.1667	1.3333
C12H16O2N2	0.999986	0.00337459	0.1667	1.3333
C12H16O2S1	0.384564	0.748703	0.1667	1.3333
C12H16O3	-0.985417	0.108854	0.25	1.3333
C12H16O3S1	-0.979168	0.130171	0.25	1.3333
C12H16O4	-0.731284	0.477843	0.3333	1.3333
C12H16O4N2	0.756374	0.453939	0.3333	1.3333
C12H16O4S1	-0.913583	0.266607	0.3333	1.3333
C12H16O5	0.927101	0.244585	0.4167	1.3333
C12H16O5N2	0.828094	0.378851	0.4167	1.3333
C12H16O5S1	-0.960212	0.180186	0.4167	1.3333
C12H16O6	0.911873	0.269272	0.5	1.3333
C12H16O6N2	0.736539	0.472917	0.5	1.3333
C12H16O6N2S1	-0.489895	0.67407	0.5	1.3333
C12H16O6S1	-0.977702	0.134692	0.5	1.3333
C12H16O7	0.771343	0.43917	0.5833	1.3333
C12H16O7S1	-0.999835	0.0115746	0.5833	1.3333
C12H16O8	0.44801	0.704266	0.6667	1.3333
C12H16O8S1	-0.686885	0.517955	0.6667	1.3333
C12H16O9	-0.304237	0.803197	0.75	1.3333
C12H16O9S1	-0.577964	0.607695	0.75	1.3333
C12H17O2N1	0.896235	0.292583	0.1667	1.4167
C12H17O3N1	-0.264425	0.829635	0.25	1.4167
C12H17O4N1	-0.181847	0.883585	0.3333	1.4167
C12H17O4N1S1	-0.316836	0.794759	0.3333	1.4167
C12H17O5N1	0.78713	0.423132	0.4167	1.4167
C12H17O5N1S1	-0.362243	0.764022	0.4167	1.4167
C12H17O5N3	0.581026	0.605303	0.4167	1.4167
C12H17O6N1	0.863658	0.336336	0.5	1.4167
C12H17O6N1S1	-0.35226	0.770827	0.5	1.4167
C12H17O7N1	0.457483	0.697502	0.5833	1.4167
C12H17O8N1	-0.402812	0.736066	0.6667	1.4167
C12H18O1	0.997383	0.04607	0.0833	1.5
C12H18O2	-0.187543	0.879895	0.1667	1.5
C12H18O2N2	0.554885	0.625525	0.1667	1.5
C12H18O3	0.788465	0.421752	0.25	1.5
C12H18O3N2	0.867348	0.331645	0.25	1.5
C12H18O3S1	-0.920036	0.256319	0.25	1.5
C12H18O4	-0.178751	0.885589	0.3333	1.5
C12H18O4N2	0.652309	0.547601	0.3333	1.5
C12H18O4S1	-0.0037912	0.997586	0.3333	1.5
C12H18O5	-0.858058	0.343341	0.4167	1.5
C12H18O5N2	0.912756	0.2679	0.4167	1.5
C12H18O5S1	-0.964136	0.171013	0.4167	1.5
C12H18O6	-0.715014	0.49284	0.5	1.5
C12H18O6N2	0.560448	0.621258	0.5	1.5
C12H18O6S1	-0.977968	0.133881	0.5	1.5
C12H18O7	0.775423	0.435073	0.5833	1.5
C12H18O7S1	-0.65273	0.547248	0.5833	1.5
C12H18O8	0.65118	0.548549	0.6667	1.5
C12H18O8S1	-0.901258	0.28529	0.6667	1.5
C12H18O9	-0.153721	0.901748	0.75	1.5
C12H18O9S1	-0.482485	0.679469	0.75	1.5
C12H19O3N1	0.551909	0.627799	0.25	1.5833
C12H19O4N1	0.98831	0.0974381	0.3333	1.5833
C12H19O5N1	0.467043	0.690639	0.4167	1.5833
C12H19O5N1S1	-0.336553	0.781478	0.4167	1.5833
C12H19O5N3	-0.129501	0.917325	0.4167	1.5833
C12H19O6N1	0.901517	0.284909	0.5	1.5833
C12H19O6N1S1	-0.221277	0.857955	0.5	1.5833
C12H19O7N1	0.746767	0.46321	0.5833	1.5833
C12H19O8N1	-0.240493	0.845382	0.6667	1.5833
C12H20O1	0.306708	0.801545	0.0833	1.6667
C12H20O4N2	0.533909	0.641445	0.3333	1.6667
C12H20O4S1	-0.913097	0.267368	0.3333	1.6667
C12H20O5N2	0.842111	0.362625	0.4167	1.6667
C12H20O5S1	-0.923119	0.251262	0.4167	1.6667
C12H20O6	0.939727	0.222158	0.5	1.6667
C12H20O6N2	0.660854	0.540389	0.5	1.6667
C12H20O6S1	-0.995041	0.0634245	0.5	1.6667
C12H20O7	0.633864	0.562936	0.5833	1.6667
C12H20O7S1	-0.486236	0.676739	0.5833	1.6667
C12H20O8	0.737566	0.47195	0.6667	1.6667
C12H20O8S1	-0.999211	0.0252922	0.6667	1.6667
C12H20O9S1	-0.191191	0.87753	0.75	1.6667
C12H21O4N1	0.358937	0.766278	0.3333	1.75
C12H21O5N1	0.979814	0.128132	0.4167	1.75
C12H21O6N1	0.683055	0.521302	0.5	1.75
C12H22O2	-0.848854	0.354586	0.1667	1.8333
C12H22O4	-0.218639	0.859677	0.3333	1.8333
C12H22O4S1	-0.77582	0.434673	0.3333	1.8333
C12H22O5	0.217865	0.860181	0.4167	1.8333
C12H22O5S1	-0.938019	0.225316	0.4167	1.8333
C12H22O6	-0.632162	0.564335	0.5	1.8333
C12H22O6S1	-0.986694	0.10397	0.5	1.8333
C12H22O7	-0.900795	0.28597	0.5833	1.8333
C12H22O7S1	0.775721	0.434772	0.5833	1.8333
C12H22O8	-0.99999	0.00289455	0.6667	1.8333
C12H22O9	-0.657591	0.543151	0.75	1.8333
C12H23O6N1S1	-0.855489	0.346513	0.5	1.9167
C12H24O10S1	-0.573453	0.611207	0.8333	2
C12H24O6	-0.999856	0.010786	0.5	2
C12H26O4S1	-0.897115	0.291318	0.3333	2.1667
C12H27O2N2S2P1	0.294653	0.809592	0.1667	2.25
C12H6O5	-0.467189	0.690534	0.4167	0.5
C12H6O5N2	-0.000526	0.999665	0.4167	0.5
C12H6O6	0.838376	0.367011	0.5	0.5
C12H7O3N1	-0.244595	0.84269	0.25	0.5833
C12H7O4N1	0.074087	0.952791	0.3333	0.5833
C12H7O5N1	-0.177534	0.886376	0.4167	0.5833
C12H7O6N1	0.38856	0.745946	0.5	0.5833
C12H7O7N1	-0.217023	0.860731	0.5833	0.5833
C12H8O2N2	0.0470212	0.970054	0.1667	0.6667
C12H8O3	0.251124	0.8384	0.25	0.6667
C12H8O3N2	-0.0158447	0.989913	0.25	0.6667
C12H8O4	0.262355	0.831002	0.3333	0.6667
C12H8O4N2	-0.939386	0.222792	0.3333	0.6667
C12H8O4S1	-0.993447	0.0729198	0.3333	0.6667
C12H8O5	0.521391	0.650827	0.4167	0.6667
C12H8O5N2	0.721023	0.487344	0.4167	0.6667
C12H8O5S1	-0.598469	0.591552	0.4167	0.6667
C12H8O6	0.958362	0.184357	0.5	0.6667
C12H8O6N2	0.942512	0.216914	0.5	0.6667
C12H8O6S1	0.662399	0.539077	0.5	0.6667
C12H8O7	0.82461	0.382789	0.5833	0.6667
C12H8O8	0.775588	0.434907	0.6667	0.6667
C12H9O2N1	0.997035	0.0490334	0.1667	0.75
C12H9O3N1	-0.0139807	0.991099	0.25	0.75
C12H9O3N1S1	0.57374	0.610984	0.25	0.75
C12H9O4N1	0.62817	0.567609	0.3333	0.75
C12H9O4N1S1	-0.0705805	0.95503	0.3333	0.75
C12H9O5N1	0.543828	0.633949	0.4167	0.75
C12H9O5N1S1	0.890205	0.301122	0.4167	0.75
C12H9O6N1	0.739891	0.469754	0.5	0.75
C12H9O6N1S1	0.166204	0.893698	0.5	0.75
C12H9O7N1	0.382888	0.749859	0.5833	0.75
C12H9O8N1	0.759643	0.450747	0.6667	0.75
C13H10O1	-0.672883	0.530111	0.0769	0.7692
C13H10O2N2	0.999684	0.0160172	0.1538	0.7692
C13H10O3	-0.634682	0.562262	0.2308	0.7692
C13H10O3N2	-0.761747	0.448684	0.2308	0.7692
C13H10O3N2S1	-0.897274	0.291089	0.2308	0.7692
C13H10O4	-0.236772	0.847821	0.3077	0.7692
C13H10O4N2	-0.51631	0.65461	0.3077	0.7692
C13H10O4S1	-0.928181	0.242745	0.3077	0.7692
C13H10O5	0.934677	0.231378	0.3846	0.7692
C13H10O5N2	0.645212	0.553538	0.3846	0.7692
C13H10O5N2S1	0.813637	0.394969	0.3846	0.7692
C13H10O5S1	-0.957169	0.186998	0.3846	0.7692
C13H10O6	-0.805635	0.403649	0.4615	0.7692
C13H10O6N2	0.848052	0.355551	0.4615	0.7692
C13H10O6S1	-0.826318	0.380863	0.4615	0.7692
C13H10O7	0.747876	0.462148	0.5385	0.7692
C13H10O7N2	0.573187	0.611414	0.5385	0.7692
C13H10O7S1	0.479669	0.681513	0.5385	0.7692
C13H10O8	0.888462	0.303549	0.6154	0.7692
C13H10O8N2	0.999999	0.00109094	0.6154	0.7692
C13H10O9	0.4686	0.689517	0.6923	0.7692
C13H11O2N1	0.997861	0.0416461	0.1538	0.8462
C13H11O3N1	0.278425	0.820375	0.2308	0.8462
C13H11O4N1	0.997073	0.0487199	0.3077	0.8462
C13H11O4N1S1	-0.786198	0.424093	0.3077	0.8462
C13H11O5N1	0.885881	0.307109	0.3846	0.8462
C13H11O5N1S1	-0.174121	0.888583	0.3846	0.8462
C13H11O6N1	0.741778	0.467966	0.4615	0.8462
C13H11O6N1S1	-0.0052752	0.996642	0.4615	0.8462
C13H11O7N1	0.818943	0.389121	0.5385	0.8462
C13H11O7N1S1	-0.223428	0.856551	0.5385	0.8462
C13H11O8N1	0.461351	0.69473	0.6154	0.8462
C13H12O2N2	0.324385	0.789685	0.1538	0.9231
C13H12O3	-0.712468	0.495155	0.2308	0.9231
C13H12O3N2	-0.958837	0.183295	0.2308	0.9231
C13H12O3S1	-0.968171	0.161051	0.2308	0.9231
C13H12O4	-0.877987	0.317773	0.3077	0.9231
C13H12O4N2	0.843645	0.36081	0.3077	0.9231
C13H12O4S1	-0.976169	0.139261	0.3077	0.9231
C13H12O5	-0.157912	0.899047	0.3846	0.9231
C13H12O5N2	0.814486	0.394038	0.3846	0.9231
C13H12O5S1	-0.945927	0.210312	0.3846	0.9231
C13H12O6	-0.875979	0.320433	0.4615	0.9231
C13H12O6N2	0.724142	0.484472	0.4615	0.9231
C13H12O6N2S1	0.183061	0.882799	0.4615	0.9231
C13H12O6S1	-0.906646	0.277268	0.4615	0.9231
C13H12O7	0.964166	0.170942	0.5385	0.9231
C13H12O7N2	0.742269	0.467499	0.5385	0.9231
C13H12O7S1	-0.894436	0.295155	0.5385	0.9231
C13H12O8	-0.790239	0.419913	0.6154	0.9231
C13H12O8S1	-0.0183288	0.988331	0.6154	0.9231
C13H12O9	-0.113105	0.92784	0.6923	0.9231
C13H12O9S1	-0.962093	0.175848	0.6923	0.9231
C13H13O2N1	0.198634	0.872699	0.1538	1
C13H13O3N1	0.95771	0.185804	0.2308	1
C13H13O4N1	0.869922	0.328338	0.3077	1
C13H13O4N1S1	0.580322	0.605854	0.3077	1
C13H13O5N1	0.981088	0.124009	0.3846	1
C13H13O5N1S1	-0.117776	0.924847	0.3846	1
C13H13O6N1	0.880316	0.314662	0.4615	1
C13H13O6N1S1	-0.323179	0.790497	0.4615	1
C13H13O7N1	0.425198	0.720409	0.5385	1
C13H13O7N1S1	0.972835	0.148727	0.5385	1
C13H13O8N1	-0.173799	0.888792	0.6154	1
C13H13O9N1	-0.98723	0.101847	0.6923	1
C13H14O1	-0.964739	0.169562	0.0769	1.0769
C13H14O10	-0.0691547	0.95594	0.7692	1.0769
C13H14O2	-0.924134	0.249577	0.1538	1.0769
C13H14O2N2	-0.297285	0.807838	0.1538	1.0769
C13H14O3	0.946663	0.208861	0.2308	1.0769
C13H14O3N2	0.986917	0.103092	0.2308	1.0769
C13H14O3S1	-0.962176	0.175654	0.2308	1.0769
C13H14O4	0.73974	0.469897	0.3077	1.0769
C13H14O4N2	0.826847	0.380265	0.3077	1.0769
C13H14O4N2S1	0.943303	0.215402	0.3077	1.0769
C13H14O4S1	-0.584715	0.602413	0.3077	1.0769
C13H14O5	-0.917899	0.259768	0.3846	1.0769
C13H14O5N2	0.798612	0.411136	0.3846	1.0769
C13H14O5N2S1	-0.136717	0.91269	0.3846	1.0769
C13H14O5S1	-0.959771	0.181188	0.3846	1.0769
C13H14O6	0.89343	0.296583	0.4615	1.0769
C13H14O6N2	0.53555	0.640209	0.4615	1.0769
C13H14O6N2S1	0.583161	0.603631	0.4615	1.0769
C13H14O6S1	-0.254814	0.835971	0.4615	1.0769
C13H14O7	0.417456	0.725844	0.5385	1.0769
C13H14O7N2	0.392928	0.742924	0.5385	1.0769
C13H14O7S1	-0.993986	0.0698549	0.5385	1.0769
C13H14O8	0.374315	0.755756	0.6154	1.0769
C13H14O8N2	0.847397	0.356337	0.6154	1.0769
C13H14O8S1	-0.677884	0.525795	0.6154	1.0769
C13H14O9	-0.0562728	0.964157	0.6923	1.0769
C13H14O9S1	-0.124756	0.920371	0.6923	1.0769
C13H15O2N1	0.908749	0.274078	0.1538	1.1538
C13H15O3N1	0.255265	0.835674	0.2308	1.1538
C13H15O4N1	-0.168174	0.892426	0.3077	1.1538
C13H15O4N1S1	-0.934256	0.232131	0.3077	1.1538
C13H15O5N1	-0.830871	0.375685	0.3846	1.1538
C13H15O5N1S1	-0.296692	0.808233	0.3846	1.1538
C13H15O6N1	0.889848	0.301621	0.4615	1.1538
C13H15O6N1S1	0.831702	0.374734	0.4615	1.1538
C13H15O7N1	0.790455	0.419688	0.5385	1.1538
C13H15O7N1S1	-0.99737	0.0461856	0.5385	1.1538
C13H15O8N1	0.112351	0.928324	0.6154	1.1538
C13H15O8N1S1	0.00782294	0.99502	0.6154	1.1538
C13H15O9N1	0.414724	0.727756	0.6923	1.1538
C13H16O1	-0.644541	0.554097	0.0769	1.2308
C13H16O1N2	0.998621	0.0334395	0.0769	1.2308
C13H16O2	-0.930934	0.23799	0.1538	1.2308
C13H16O2N2	0.806298	0.402936	0.1538	1.2308
C13H16O3	-0.700646	0.505791	0.2308	1.2308
C13H16O3N2	0.526969	0.646657	0.2308	1.2308
C13H16O3S1	-0.0682405	0.956523	0.2308	1.2308
C13H16O4	0.772135	0.438378	0.3077	1.2308
C13H16O4N2	0.848763	0.354696	0.3077	1.2308
C13H16O4S1	-0.96824	0.160875	0.3077	1.2308
C13H16O5	-0.322675	0.790836	0.3846	1.2308
C13H16O5N2	0.746092	0.463856	0.3846	1.2308
C13H16O5S1	-0.955013	0.191682	0.3846	1.2308
C13H16O6	-0.160161	0.897598	0.4615	1.2308
C13H16O6N2	0.887737	0.304552	0.4615	1.2308
C13H16O6S1	-0.993868	0.0705362	0.4615	1.2308
C13H16O7	0.848903	0.354528	0.5385	1.2308
C13H16O7N2S1	-0.354309	0.769432	0.5385	1.2308
C13H16O7S1	-0.999621	0.0175168	0.5385	1.2308
C13H16O8	0.522743	0.649817	0.6154	1.2308
C13H16O8S1	-0.968297	0.160731	0.6154	1.2308
C13H16O9	0.130111	0.916934	0.6923	1.2308
C13H16O9S1	-0.986252	0.105686	0.6923	1.2308
C13H17O2N1	0.508982	0.660044	0.1538	1.3077
C13H17O3N1	0.473208	0.686192	0.2308	1.3077
C13H17O4N1	0.998816	0.0309809	0.3077	1.3077
C13H17O4N1S1	0.977834	0.134292	0.3077	1.3077
C13H17O5N1	0.976089	0.139496	0.3846	1.3077
C13H17O5N1S1	0.811451	0.397356	0.3846	1.3077
C13H17O6N1	0.879917	0.315196	0.4615	1.3077
C13H17O6N1S1	-0.999793	0.0129402	0.4615	1.3077
C13H17O7N1	0.757459	0.452881	0.5385	1.3077
C13H17O7N1S1	-0.787832	0.422407	0.5385	1.3077
C13H17O8N1	0.455772	0.698726	0.6154	1.3077
C13H17O8N1S1	-0.984217	0.113258	0.6154	1.3077
C13H17O9N1	-0.466419	0.691088	0.6923	1.3077
C13H18O1	-0.382909	0.749845	0.0769	1.3846
C13H18O10	0.0321389	0.979536	0.7692	1.3846
C13H18O2	-0.922973	0.251503	0.1538	1.3846
C13H18O2N2	-0.445216	0.706254	0.1538	1.3846
C13H18O3	-0.99155	0.0828199	0.2308	1.3846
C13H18O3N2	0.899777	0.287459	0.2308	1.3846
C13H18O3S1	-0.943024	0.215936	0.2308	1.3846
C13H18O4	0.923731	0.250248	0.3077	1.3846
C13H18O4N2	0.876779	0.319375	0.3077	1.3846
C13H18O4S1	-0.943758	0.214527	0.3077	1.3846
C13H18O5	0.9104	0.271549	0.3846	1.3846
C13H18O5N2	0.879288	0.316038	0.3846	1.3846
C13H18O5S1	-0.191549	0.877298	0.3846	1.3846
C13H18O6	0.946932	0.20833	0.4615	1.3846
C13H18O6N2	0.780924	0.429497	0.4615	1.3846
C13H18O6S1	0.0138947	0.991154	0.4615	1.3846
C13H18O7	0.803447	0.405995	0.5385	1.3846
C13H18O7S1	-0.928271	0.24259	0.5385	1.3846
C13H18O7S2	-0.773366	0.437143	0.5385	1.3846
C13H18O8	0.706822	0.500257	0.6154	1.3846
C13H18O8S1	-0.742673	0.467115	0.6154	1.3846
C13H18O9	0.192719	0.876539	0.6923	1.3846
C13H18O9S1	-0.643387	0.555057	0.6923	1.3846
C13H19O2N1	0.844618	0.359656	0.1538	1.4615
C13H19O3N1	-0.781854	0.428548	0.2308	1.4615
C13H19O4N1	0.99732	0.0466157	0.3077	1.4615
C13H19O5N1	0.973762	0.146154	0.3846	1.4615
C13H19O5N1S1	-0.0294852	0.981226	0.3846	1.4615
C13H19O5N3	0.0790749	0.949607	0.3846	1.4615
C13H19O6N1	0.934428	0.231822	0.4615	1.4615
C13H19O6N1S1	0.355402	0.768688	0.4615	1.4615
C13H19O7N1	0.7504	0.459721	0.5385	1.4615
C13H19O7N1S1	-0.0460764	0.970656	0.5385	1.4615
C13H19O8N1	0.0775725	0.950566	0.6154	1.4615
C13H19O9N1	-0.534714	0.640838	0.6923	1.4615
C13H20O1	-0.221436	0.857851	0.0769	1.5385
C13H20O3N2	-0.830216	0.376434	0.2308	1.5385
C13H20O4N2	-0.978761	0.131443	0.3077	1.5385
C13H20O4S1	-0.939971	0.221704	0.3077	1.5385
C13H20O5	0.921236	0.254361	0.3846	1.5385
C13H20O5N2	0.854874	0.347268	0.3846	1.5385
C13H20O5S1	-0.901281	0.285255	0.3846	1.5385
C13H20O6	0.915286	0.26393	0.4615	1.5385
C13H20O6N2	0.485554	0.677236	0.4615	1.5385
C13H20O6S1	-0.901996	0.284204	0.4615	1.5385
C13H20O7	0.938018	0.225318	0.5385	1.5385
C13H20O7S1	-0.578188	0.60752	0.5385	1.5385
C13H20O8	0.638342	0.559241	0.6154	1.5385
C13H20O8S1	-0.468289	0.689741	0.6154	1.5385
C13H20O9	0.361766	0.764348	0.6923	1.5385
C13H20O9S1	0.260597	0.832161	0.6923	1.5385
C13H21O4N1	0.622354	0.572353	0.3077	1.6154
C13H21O5N1	0.844063	0.360314	0.3846	1.6154
C13H21O5N3	0.97882	0.131259	0.3846	1.6154
C13H21O6N1	0.899816	0.287401	0.4615	1.6154
C13H21O6N1S1	0.978954	0.13084	0.4615	1.6154
C13H21O7N1	0.662961	0.538599	0.5385	1.6154
C13H21O8N1	0.770509	0.440005	0.6154	1.6154
C13H22O4	-0.922691	0.251969	0.3077	1.6923
C13H22O4N2	-0.970329	0.155468	0.3077	1.6923
C13H22O4S1	-0.853191	0.349328	0.3077	1.6923
C13H22O5N2	0.403187	0.735805	0.3846	1.6923
C13H22O5S1	-0.982645	0.118779	0.3846	1.6923
C13H22O6	0.842796	0.361816	0.4615	1.6923
C13H22O6N2	-0.289673	0.812907	0.4615	1.6923
C13H22O6S1	-0.997855	0.041706	0.4615	1.6923
C13H22O7	-0.701618	0.504923	0.5385	1.6923
C13H22O7S1	-0.680314	0.523686	0.5385	1.6923
C13H22O8	0.70099	0.505484	0.6154	1.6923
C13H22O8S1	0.0391521	0.975069	0.6154	1.6923
C13H22O9S1	-0.731048	0.478063	0.6923	1.6923
C13H23O6N1	0.878736	0.316775	0.4615	1.7692
C13H24O4	-0.870686	0.32735	0.3077	1.8462
C13H24O5	-0.0623375	0.960289	0.3846	1.8462
C13H24O5S1	-0.948785	0.204628	0.3846	1.8462
C13H24O6	0.557999	0.623138	0.4615	1.8462
C13H24O6S1	-0.978862	0.131128	0.4615	1.8462
C13H24O7	-0.714954	0.492895	0.5385	1.8462
C13H6O5	-0.331462	0.784916	0.3846	0.4615
C13H6O7	-0.746222	0.463731	0.5385	0.4615
C13H7O4N1	0.326812	0.788051	0.3077	0.5385
C13H7O5N1	0.873012	0.324327	0.3846	0.5385
C13H7O6N1	0.17967	0.884994	0.4615	0.5385
C13H8O2	-0.783095	0.42728	0.1538	0.6154
C13H8O3	0.257845	0.833975	0.2308	0.6154
C13H8O4	0.469207	0.68908	0.3077	0.6154
C13H8O4N2	0.973651	0.146467	0.3077	0.6154
C13H8O4S1	0.99417	0.0687773	0.3077	0.6154
C13H8O5	0.827566	0.37945	0.3846	0.6154
C13H8O5N2	0.82874	0.378116	0.3846	0.6154
C13H8O5S1	0.883824	0.30992	0.3846	0.6154
C13H8O6	0.487071	0.676131	0.4615	0.6154
C13H8O6N2	0.86504	0.334586	0.4615	0.6154
C13H8O6S1	0.959402	0.182024	0.4615	0.6154
C13H8O7	0.876676	0.319512	0.5385	0.6154
C13H8O8	0.804857	0.404484	0.6154	0.6154
C13H9O2N1	-0.00690845	0.995602	0.1538	0.6923
C13H9O3N1	0.662367	0.539104	0.2308	0.6923
C13H9O4N1	0.939304	0.222945	0.3077	0.6923
C13H9O4N1S1	-0.00516991	0.996709	0.3077	0.6923
C13H9O5N1	0.919552	0.257104	0.3846	0.6923
C13H9O5N1S1	0.635249	0.561795	0.3846	0.6923
C13H9O6N1	0.784994	0.425332	0.4615	0.6923
C13H9O6N1S1	0.778834	0.431623	0.4615	0.6923
C13H9O7N1	0.125087	0.920158	0.5385	0.6923
C13H9O8N1	0.706134	0.500875	0.6154	0.6923
C14H10O10	0.613034	0.579898	0.7143	0.7143
C14H10O2	0.998732	0.0320567	0.1429	0.7143
C14H10O3	-0.364937	0.762181	0.2143	0.7143
C14H10O3N2	-0.694196	0.51152	0.2143	0.7143
C14H10O4	0.0751623	0.952105	0.2857	0.7143
C14H10O4N2	0.830536	0.376069	0.2857	0.7143
C14H10O4S1	-0.423557	0.721563	0.2857	0.7143
C14H10O5	0.778551	0.43191	0.3571	0.7143
C14H10O5N2	0.73129	0.477838	0.3571	0.7143
C14H10O5S1	-0.995652	0.0593868	0.3571	0.7143
C14H10O6	-0.753179	0.457038	0.4286	0.7143
C14H10O6N2	0.958854	0.183256	0.4286	0.7143
C14H10O6S1	-0.947586	0.207031	0.4286	0.7143
C14H10O7	0.528502	0.645508	0.5	0.7143
C14H10O7N2	0.932189	0.235793	0.5	0.7143
C14H10O7S1	0.723078	0.485454	0.5	0.7143
C14H10O8	0.981999	0.120975	0.5714	0.7143
C14H10O8N2	0.81388	0.394702	0.5714	0.7143
C14H10O9	0.939251	0.223043	0.6429	0.7143
C14H11O14P1	-0.826903	0.380202	1	0.7857
C14H11O2N1	0.442284	0.708337	0.1429	0.7857
C14H11O3N1	0.244653	0.842652	0.2143	0.7857
C14H11O4N1	0.643175	0.555233	0.2857	0.7857
C14H11O4N1S1	0.425754	0.720018	0.2857	0.7857
C14H11O5N1	0.899392	0.288019	0.3571	0.7857
C14H11O5N1S1	0.852473	0.350204	0.3571	0.7857
C14H11O6N1	0.911761	0.269446	0.4286	0.7857
C14H11O6N1S1	-0.0641453	0.959136	0.4286	0.7857
C14H11O7N1	0.96853	0.160135	0.5	0.7857
C14H11O7N1S1	-0.599061	0.591081	0.5	0.7857
C14H11O8N1	0.999999	0.000978	0.5714	0.7857
C14H11O9N1	0.692205	0.513279	0.6429	0.7857
C14H12O1	0.998191	0.0382947	0.0714	0.8571
C14H12O10	0.560245	0.621414	0.7143	0.8571
C14H12O2	0.959084	0.182739	0.1429	0.8571
C14H12O2N2	0.452965	0.700732	0.1429	0.8571
C14H12O3	-0.933987	0.23261	0.2143	0.8571
C14H12O3N2	0.572589	0.611878	0.2143	0.8571
C14H12O4	0.764144	0.446324	0.2857	0.8571
C14H12O4N2	0.997803	0.0422035	0.2857	0.8571
C14H12O4S1	-0.852233	0.350496	0.2857	0.8571
C14H12O5	0.969959	0.156439	0.3571	0.8571
C14H12O5N2	0.885615	0.307475	0.3571	0.8571
C14H12O5S1	-0.996839	0.0506326	0.3571	0.8571
C14H12O6	0.987761	0.0997043	0.4286	0.8571
C14H12O6N2	0.886303	0.30653	0.4286	0.8571
C14H12O6N2S1	0.978438	0.132443	0.4286	0.8571
C14H12O6S1	-0.953405	0.195105	0.4286	0.8571
C14H12O7	0.633553	0.563192	0.5	0.8571
C14H12O7N2	0.923597	0.25047	0.5	0.8571
C14H12O7S1	-0.562762	0.619478	0.5	0.8571
C14H12O8	0.822135	0.385566	0.5714	0.8571
C14H12O8N2	0.383872	0.749181	0.5714	0.8571
C14H12O8S1	0.61381	0.579272	0.5714	0.8571
C14H12O9	0.900005	0.287126	0.6429	0.8571
C14H13O2N1	0.571286	0.612889	0.1429	0.9286
C14H13O3N1	0.999329	0.0233245	0.2143	0.9286
C14H13O4N1	-0.677173	0.52641	0.2857	0.9286
C14H13O4N1S1	0.736622	0.47284	0.2857	0.9286
C14H13O5N1	0.989047	0.0943085	0.3571	0.9286
C14H13O5N1S1	-0.979562	0.128932	0.3571	0.9286
C14H13O6N1	0.897174	0.291233	0.4286	0.9286
C14H13O6N1S1	0.705845	0.501135	0.4286	0.9286
C14H13O7N1	0.942981	0.216019	0.5	0.9286
C14H13O7N1S1	0.964392	0.170398	0.5	0.9286
C14H13O8N1	0.707911	0.499276	0.5714	0.9286
C14H13O8N1S1	-0.749048	0.461023	0.5714	0.9286
C14H13O9N1	-0.545947	0.63234	0.6429	0.9286
C14H14O10	0.293459	0.810387	0.7143	1
C14H14O2	0.573476	0.611189	0.1429	1
C14H14O2N2	-0.351577	0.771291	0.1429	1
C14H14O3	0.752287	0.457902	0.2143	1
C14H14O3N2	-0.536903	0.639189	0.2143	1
C14H14O3S1	-0.195176	0.874944	0.2143	1
C14H14O4	0.335581	0.782135	0.2857	1
C14H14O4N2	0.752534	0.457663	0.2857	1
C14H14O4S1	-0.977118	0.13645	0.2857	1
C14H14O5	-0.896904	0.291622	0.3571	1
C14H14O5N2	0.876087	0.320291	0.3571	1
C14H14O5S1	-0.868456	0.330226	0.3571	1
C14H14O6	0.942361	0.217202	0.4286	1
C14H14O6N2	0.955511	0.190609	0.4286	1
C14H14O6N2S1	-0.0997322	0.936403	0.4286	1
C14H14O6S1	-0.470799	0.687932	0.4286	1
C14H14O7	0.989051	0.0942949	0.5	1
C14H14O7N2	0.702294	0.504318	0.5	1
C14H14O7N2S1	0.999912	0.00844461	0.5	1
C14H14O7S1	-0.999338	0.0231585	0.5	1
C14H14O8	0.757638	0.452707	0.5714	1
C14H14O8N2	0.78364	0.426721	0.5714	1
C14H14O8S1	0.298725	0.806878	0.5714	1
C14H14O9	0.270792	0.825429	0.6429	1
C14H14O9N2	0.40341	0.73565	0.6429	1
C14H14O9S1	0.812782	0.395904	0.6429	1
C14H15O2N1	-0.376721	0.754103	0.1429	1.0714
C14H15O3N1	0.983945	0.114231	0.2143	1.0714
C14H15O3N3S1	-0.72838	0.480547	0.2143	1.0714
C14H15O4N1	0.631449	0.564921	0.2857	1.0714
C14H15O4N1S1	-0.434104	0.71413	0.2857	1.0714
C14H15O5N1	0.799399	0.410303	0.3571	1.0714
C14H15O5N1S1	-0.170224	0.891102	0.3571	1.0714
C14H15O6N1	0.892974	0.297229	0.4286	1.0714
C14H15O6N1S1	0.953076	0.195798	0.4286	1.0714
C14H15O7N1	0.73443	0.4749	0.5	1.0714
C14H15O7N1S1	0.44972	0.703048	0.5	1.0714
C14H15O8N1	0.513585	0.656634	0.5714	1.0714
C14H15O8N1S1	0.985034	0.110279	0.5714	1.0714
C14H15O9N1	0.389573	0.745245	0.6429	1.0714
C14H16O1	0.0716731	0.954332	0.0714	1.1429
C14H16O10	-0.790509	0.419632	0.7143	1.1429
C14H16O11	-0.676103	0.527335	0.7857	1.1429
C14H16O2	-0.963391	0.172791	0.1429	1.1429
C14H16O2N2	0.0825482	0.947388	0.1429	1.1429
C14H16O3	0.699011	0.507248	0.2143	1.1429
C14H16O3N2	0.368663	0.759631	0.2143	1.1429
C14H16O3S1	-0.699805	0.50654	0.2143	1.1429
C14H16O4	0.956746	0.187926	0.2857	1.1429
C14H16O4N2	0.865091	0.334521	0.2857	1.1429
C14H16O4N2S1	0.411716	0.729859	0.2857	1.1429
C14H16O4S1	-0.969488	0.157666	0.2857	1.1429
C14H16O5	0.982224	0.120214	0.3571	1.1429
C14H16O5N2	-0.797388	0.412429	0.3571	1.1429
C14H16O5N2S1	-0.43994	0.709999	0.3571	1.1429
C14H16O5S1	-0.933491	0.233493	0.3571	1.1429
C14H16O6	-0.878876	0.316588	0.4286	1.1429
C14H16O6N2	0.899027	0.28855	0.4286	1.1429
C14H16O6N2S1	-0.814533	0.393987	0.4286	1.1429
C14H16O6S1	-0.992971	0.0755263	0.4286	1.1429
C14H16O7	-0.887344	0.305096	0.5	1.1429
C14H16O7N2	0.886155	0.306733	0.5	1.1429
C14H16O7N2S1	-0.877973	0.317791	0.5	1.1429
C14H16O7S1	-0.998717	0.0322523	0.5	1.1429
C14H16O8	0.414213	0.728113	0.5714	1.1429
C14H16O8N2	0.764345	0.446125	0.5714	1.1429
C14H16O8S1	-0.970718	0.154439	0.5714	1.1429
C14H16O9	0.322125	0.791206	0.6429	1.1429
C14H16O9N2	0.149015	0.904779	0.6429	1.1429
C14H16O9S1	-0.948853	0.20449	0.6429	1.1429
C14H17O10N1	-0.235379	0.848734	0.7143	1.2143
C14H17O2N1	0.597331	0.592456	0.1429	1.2143
C14H17O3N1	0.537169	0.638987	0.2143	1.2143
C14H17O4N1	0.791074	0.419044	0.2857	1.2143
C14H17O5N1	0.916463	0.262063	0.3571	1.2143
C14H17O5N1S1	0.648293	0.550967	0.3571	1.2143
C14H17O6N1	0.953247	0.195437	0.4286	1.2143
C14H17O6N1S1	0.920997	0.254752	0.4286	1.2143
C14H17O7N1	0.910108	0.271997	0.5	1.2143
C14H17O7N1S1	0.614579	0.578651	0.5	1.2143
C14H17O8N1	0.666656	0.53545	0.5714	1.2143
C14H17O8N1S1	-0.823863	0.383629	0.5714	1.2143
C14H17O9N1	0.0569772	0.963708	0.6429	1.2143
C14H18O1	0.517367	0.653825	0.0714	1.2857
C14H18O10	0.0188984	0.987968	0.7143	1.2857
C14H18O2	0.931492	0.237015	0.1429	1.2857
C14H18O2N2	0.864822	0.334863	0.1429	1.2857
C14H18O3	0.746794	0.463185	0.2143	1.2857
C14H18O3N2	0.57628	0.609008	0.2143	1.2857
C14H18O3S1	-0.92508	0.247995	0.2143	1.2857
C14H18O4	-0.7214	0.486998	0.2857	1.2857
C14H18O4N2	0.911498	0.269854	0.2857	1.2857
C14H18O4S1	-0.0697135	0.955583	0.2857	1.2857
C14H18O5	-0.578649	0.60716	0.3571	1.2857
C14H18O5N2	0.885161	0.308096	0.3571	1.2857
C14H18O5N2S1	-0.952445	0.197119	0.3571	1.2857
C14H18O5S1	-0.138283	0.911683	0.3571	1.2857
C14H18O6	0.99275	0.0767051	0.4286	1.2857
C14H18O6N2	0.681193	0.522923	0.4286	1.2857
C14H18O6N2S1	0.292182	0.811237	0.4286	1.2857
C14H18O6S1	-0.999512	0.0198935	0.4286	1.2857
C14H18O7	-0.72401	0.484594	0.5	1.2857
C14H18O7N2	0.782009	0.42839	0.5	1.2857
C14H18O7N2S1	0.836113	0.369645	0.5	1.2857
C14H18O7S1	-0.995128	0.0628663	0.5	1.2857
C14H18O8	0.754851	0.455418	0.5714	1.2857
C14H18O8N2	0.501952	0.66523	0.5714	1.2857
C14H18O8S1	-0.963063	0.173568	0.5714	1.2857
C14H18O9	0.96869	0.159725	0.6429	1.2857
C14H18O9S1	-0.906545	0.27742	0.6429	1.2857
C14H19O2N1	-0.976813	0.137361	0.1429	1.3571
C14H19O3N1	-0.0173533	0.988952	0.2143	1.3571
C14H19O4N1	0.522021	0.650357	0.2857	1.3571
C14H19O5N1	0.769798	0.440714	0.3571	1.3571
C14H19O6N1	0.967696	0.162255	0.4286	1.3571
C14H19O6N1S1	0.951647	0.19878	0.4286	1.3571
C14H19O7N1	0.87376	0.323349	0.5	1.3571
C14H19O7N1S1	0.659216	0.541777	0.5	1.3571
C14H19O7N3	-0.442884	0.707911	0.5	1.3571
C14H19O8N1	0.73614	0.473293	0.5714	1.3571
C14H19O8N1S1	-0.999986	0.00333201	0.5714	1.3571
C14H19O9N1	0.00239521	0.998475	0.6429	1.3571
C14H20O1	-0.155262	0.900756	0.0714	1.4286
C14H20O10	0.0965974	0.938408	0.7143	1.4286
C14H20O10S1	0.342325	0.777571	0.7143	1.4286
C14H20O2	-0.950905	0.200312	0.1429	1.4286
C14H20O2N2	0.956908	0.18757	0.1429	1.4286
C14H20O3	-0.930285	0.23912	0.2143	1.4286
C14H20O3N2	0.488485	0.6751	0.2143	1.4286
C14H20O3S1	-0.954126	0.193577	0.2143	1.4286
C14H20O4	0.817685	0.390514	0.2857	1.4286
C14H20O4N2	0.7665	0.443993	0.2857	1.4286
C14H20O4S1	-0.184241	0.882034	0.2857	1.4286
C14H20O5	-0.0675576	0.956959	0.3571	1.4286
C14H20O5N2	-0.885379	0.307798	0.3571	1.4286
C14H20O5S1	-0.968676	0.159762	0.3571	1.4286
C14H20O6	0.947161	0.207876	0.4286	1.4286
C14H20O6N2	0.838549	0.366809	0.4286	1.4286
C14H20O6S1	-0.999673	0.0162754	0.4286	1.4286
C14H20O7	0.947323	0.207555	0.5	1.4286
C14H20O7S1	-0.986667	0.104076	0.5	1.4286
C14H20O7S2	0.212616	0.863603	0.5	1.4286
C14H20O8	0.802088	0.407445	0.5714	1.4286
C14H20O8N2	0.604702	0.586584	0.5714	1.4286
C14H20O8S1	-0.988404	0.0970462	0.5714	1.4286
C14H20O9	0.713728	0.49401	0.6429	1.4286
C14H20O9S1	-0.98656	0.104492	0.6429	1.4286
C14H21O2N1	-0.951462	0.199163	0.1429	1.5
C14H21O4N1	0.92399	0.249816	0.2857	1.5
C14H21O5N1	0.988612	0.0961696	0.3571	1.5
C14H21O5N1S1	0.962759	0.174286	0.3571	1.5
C14H21O5N3	0.957172	0.186992	0.3571	1.5
C14H21O6N1	0.944282	0.213515	0.4286	1.5
C14H21O6N1S1	-0.415307	0.727349	0.4286	1.5
C14H21O6N3	-0.999839	0.0114413	0.4286	1.5
C14H21O6N5S2	0.999654	0.0167406	0.4286	1.5
C14H21O7N1	0.908424	0.274573	0.5	1.5
C14H21O7N1S1	-0.816725	0.391574	0.5	1.5
C14H21O7N3	0.123914	0.920911	0.5	1.5
C14H21O8N1	0.873076	0.324244	0.5714	1.5
C14H21O8N1S1	-0.521176	0.650987	0.5714	1.5
C14H21O9N1	-0.121606	0.922391	0.6429	1.5
C14H22O10	0.338157	0.780393	0.7143	1.5714
C14H22O10S1	-0.274812	0.822769	0.7143	1.5714
C14H22O3S1	-0.961128	0.178086	0.2143	1.5714
C14H22O4S1	-0.9146	0.265011	0.2857	1.5714
C14H22O5	-0.888322	0.303742	0.3571	1.5714
C14H22O5S1	-0.832073	0.374308	0.3571	1.5714
C14H22O6	0.894784	0.294659	0.4286	1.5714
C14H22O6N2	0.752537	0.45766	0.4286	1.5714
C14H22O6S1	-0.680447	0.523571	0.4286	1.5714
C14H22O7	-0.751604	0.458561	0.5	1.5714
C14H22O7N2	0.812743	0.395947	0.5	1.5714
C14H22O7S1	-0.795139	0.414796	0.5	1.5714
C14H22O8	0.804148	0.405244	0.5714	1.5714
C14H22O8S1	0.311384	0.798415	0.5714	1.5714
C14H22O9	0.831557	0.3749	0.6429	1.5714
C14H22O9S1	-0.407119	0.733067	0.6429	1.5714
C14H23O4N1	0.761807	0.448625	0.2857	1.6429
C14H23O5N1	0.652763	0.54722	0.3571	1.6429
C14H23O6N1	0.971208	0.153138	0.4286	1.6429
C14H23O6N1S1	0.627889	0.567838	0.4286	1.6429
C14H23O6N3	-0.957225	0.186876	0.4286	1.6429
C14H23O7N1	0.988272	0.0975968	0.5	1.6429
C14H23O7N1S1	-0.764186	0.446282	0.5	1.6429
C14H23O8N1	0.680376	0.523633	0.5714	1.6429
C14H24O2	-0.991791	0.08163	0.1429	1.7143
C14H24O3	-0.941472	0.218886	0.2143	1.7143
C14H24O4	-0.785986	0.424312	0.2857	1.7143
C14H24O4S1	-0.963991	0.171362	0.2857	1.7143
C14H24O5S1	-0.819464	0.388543	0.3571	1.7143
C14H24O6	0.791826	0.418261	0.4286	1.7143
C14H24O6S1	-0.997726	0.0429398	0.4286	1.7143
C14H24O7	0.785892	0.424408	0.5	1.7143
C14H24O7S1	-0.384178	0.74897	0.5	1.7143
C14H24O8	0.802362	0.407153	0.5714	1.7143
C14H24O8S1	-0.150445	0.903859	0.5714	1.7143
C14H24O9	0.853206	0.34931	0.6429	1.7143
C14H24O9S1	-0.126951	0.918962	0.6429	1.7143
C14H26O10	-0.499164	0.667281	0.7143	1.8571
C14H26O4	-0.766757	0.443738	0.2857	1.8571
C14H26O4S1	-0.996311	0.0547026	0.2857	1.8571
C14H26O5	0.94435	0.213385	0.3571	1.8571
C14H26O5S1	-0.248321	0.840242	0.3571	1.8571
C14H26O6	0.838566	0.366788	0.4286	1.8571
C14H26O6S1	0.19168	0.877213	0.4286	1.8571
C14H26O7	-0.585258	0.601987	0.5	1.8571
C14H28O11S1	-0.557896	0.623217	0.7857	2
C14H28O3S1	0.73386	0.475434	0.2143	2
C14H28O4S1	-0.307446	0.801052	0.2857	2
C14H30O4S1	-0.588165	0.599701	0.2857	2.1429
C14H30O5S1	-0.327797	0.787388	0.3571	2.1429
C14H7O6N1	0.992335	0.0788711	0.4286	0.5
C14H7O7N1	0.111081	0.929137	0.5	0.5
C14H8O3	-0.898711	0.289009	0.2143	0.5714
C14H8O4	-0.175533	0.88767	0.2857	0.5714
C14H8O4N2	0.99128	0.0841315	0.2857	0.5714
C14H8O4S1	-0.964423	0.170325	0.2857	0.5714
C14H8O5	-0.729873	0.479158	0.3571	0.5714
C14H8O5N2	0.215283	0.861865	0.3571	0.5714
C14H8O6	0.822724	0.384907	0.4286	0.5714
C14H8O6N2	0.321468	0.791648	0.4286	0.5714
C14H8O6S1	-0.219136	0.859352	0.4286	0.5714
C14H8O7	0.686274	0.518491	0.5	0.5714
C14H8O8	0.694212	0.511506	0.5714	0.5714
C14H8O9	0.921005	0.254739	0.6429	0.5714
C14H9O2N1	-0.0532843	0.966062	0.1429	0.6429
C14H9O3N1	0.0598793	0.961857	0.2143	0.6429
C14H9O4N1	0.940548	0.220625	0.2857	0.6429
C14H9O5N1	0.93681	0.227528	0.3571	0.6429
C14H9O6N1	0.999943	0.00681518	0.4286	0.6429
C14H9O7N1	0.945289	0.21156	0.5	0.6429
C14H9O7N1S1	0.999945	0.00665287	0.5	0.6429
C14H9O8N1	0.668382	0.533975	0.5714	0.6429
C15H10O10	0.93068	0.238432	0.6667	0.6667
C15H10O2	0.182548	0.883131	0.1333	0.6667
C15H10O3	-0.556729	0.624113	0.2	0.6667
C15H10O4	-0.375378	0.755026	0.2667	0.6667
C15H10O4N2	-0.223356	0.856598	0.2667	0.6667
C15H10O5	0.994353	0.0676849	0.3333	0.6667
C15H10O5N2	-0.121016	0.92277	0.3333	0.6667
C15H10O5S1	-0.983691	0.115133	0.3333	0.6667
C15H10O6	0.929409	0.240634	0.4	0.6667
C15H10O6N2	0.557193	0.623757	0.4	0.6667
C15H10O6S1	-0.425984	0.719856	0.4	0.6667
C15H10O7	0.98346	0.115947	0.4667	0.6667
C15H10O7N2	0.755458	0.454829	0.4667	0.6667
C15H10O7S1	0.365186	0.762011	0.4667	0.6667
C15H10O8	0.824225	0.383222	0.5333	0.6667
C15H10O8N2	0.149191	0.904666	0.5333	0.6667
C15H10O8S1	0.881942	0.312472	0.5333	0.6667
C15H10O9	0.885043	0.308257	0.6	0.6667
C15H11O3N1	0.117756	0.92486	0.2	0.7333
C15H11O4N1	-0.293314	0.810484	0.2667	0.7333
C15H11O5N1	0.785447	0.424866	0.3333	0.7333
C15H11O5N1S1	-0.17555	0.887659	0.3333	0.7333
C15H11O6N1	0.919614	0.257003	0.4	0.7333
C15H11O6N1S1	0.958607	0.183811	0.4	0.7333
C15H11O7N1	0.966846	0.164387	0.4667	0.7333
C15H11O7N1S1	0.952653	0.196685	0.4667	0.7333
C15H11O8N1	0.944937	0.212245	0.5333	0.7333
C15H11O9N1	0.156581	0.899905	0.6	0.7333
C15H12O10	0.860941	0.339751	0.6667	0.8
C15H12O11	0.781136	0.429281	0.7333	0.8
C15H12O2	0.0503811	0.967913	0.1333	0.8
C15H12O3	-0.964988	0.168958	0.2	0.8
C15H12O3N2	-0.187829	0.87971	0.2	0.8
C15H12O4	0.469891	0.688586	0.2667	0.8
C15H12O4N2	0.736832	0.472641	0.2667	0.8
C15H12O4S1	-0.790573	0.419566	0.2667	0.8
C15H12O5	0.984292	0.112985	0.3333	0.8
C15H12O5N2	0.894805	0.294629	0.3333	0.8
C15H12O5S1	-0.865579	0.333901	0.3333	0.8
C15H12O6	0.945678	0.210799	0.4	0.8
C15H12O6N2	0.654319	0.545911	0.4	0.8
C15H12O6S1	-0.202883	0.869938	0.4	0.8
C15H12O7	0.853587	0.348844	0.4667	0.8
C15H12O7N2	0.961215	0.177885	0.4667	0.8
C15H12O7S1	-0.0569445	0.963728	0.4667	0.8
C15H12O8	0.964536	0.170053	0.5333	0.8
C15H12O8N2	0.925697	0.246959	0.5333	0.8
C15H12O8S1	0.796713	0.41314	0.5333	0.8
C15H12O9	0.868033	0.330768	0.6	0.8
C15H12O9N2	0.692444	0.513068	0.6	0.8
C15H12O9S1	0.71654	0.491449	0.6	0.8
C15H13O3N1	0.861642	0.338872	0.2	0.8667
C15H13O4N1	0.206804	0.867387	0.2667	0.8667
C15H13O5N1	0.587343	0.600348	0.3333	0.8667
C15H13O5N1S1	-0.0243526	0.984495	0.3333	0.8667
C15H13O6N1	0.999239	0.0248388	0.4	0.8667
C15H13O6N1S1	-0.956656	0.188123	0.4	0.8667
C15H13O7N1	0.948356	0.20549	0.4667	0.8667
C15H13O7N1S1	0.795245	0.414685	0.4667	0.8667
C15H13O8N1	0.99316	0.0745043	0.5333	0.8667
C15H13O8N1S1	0.765259	0.445222	0.5333	0.8667
C15H13O9N1	0.740073	0.469581	0.6	0.8667
C15H14O10	0.600688	0.589787	0.6667	0.9333
C15H14O11	-0.0228831	0.985431	0.7333	0.9333
C15H14O2	-0.999608	0.0178243	0.1333	0.9333
C15H14O3	0.934035	0.232524	0.2	0.9333
C15H14O3N2	0.960925	0.178553	0.2	0.9333
C15H14O4	0.642413	0.555867	0.2667	0.9333
C15H14O4N2	0.984821	0.111063	0.2667	0.9333
C15H14O4S1	-0.814653	0.393855	0.2667	0.9333
C15H14O5	0.950463	0.201218	0.3333	0.9333
C15H14O5N2	0.895001	0.294349	0.3333	0.9333
C15H14O5S1	-0.958559	0.183916	0.3333	0.9333
C15H14O6	0.950594	0.200952	0.4	0.9333
C15H14O6N2	0.96431	0.170596	0.4	0.9333
C15H14O6N2S1	0.292538	0.811	0.4	0.9333
C15H14O6S1	-0.953613	0.194665	0.4	0.9333
C15H14O7	0.99062	0.0872642	0.4667	0.9333
C15H14O7N2	0.934615	0.231489	0.4667	0.9333
C15H14O7N2S1	-0.800264	0.409385	0.4667	0.9333
C15H14O7S1	-0.59128	0.597245	0.4667	0.9333
C15H14O8	-0.851658	0.351195	0.5333	0.9333
C15H14O8N2	0.69159	0.513821	0.5333	0.9333
C15H14O8S1	0.969056	0.158784	0.5333	0.9333
C15H14O9	0.831946	0.374453	0.6	0.9333
C15H14O9N2	0.20075	0.871324	0.6	0.9333
C15H14O9S1	0.98001	0.127505	0.6	0.9333
C15H15O10N1	0.351121	0.771601	0.6667	1
C15H15O2N1	-0.473302	0.686124	0.1333	1
C15H15O3N1	0.785089	0.425235	0.2	1
C15H15O3P1	-0.922294	0.252625	0.2	1
C15H15O4N1	0.56813	0.615334	0.2667	1
C15H15O5N1	-0.398775	0.738871	0.3333	1
C15H15O5N1S1	0.945173	0.211785	0.3333	1
C15H15O6N1	0.989336	0.0930573	0.4	1
C15H15O6N1S1	0.33534	0.782298	0.4	1
C15H15O7N1	0.894859	0.294552	0.4667	1
C15H15O7N1S1	-0.643418	0.555031	0.4667	1
C15H15O8N1	0.867584	0.331344	0.5333	1
C15H15O8N1S1	0.000553	0.999648	0.5333	1
C15H15O9N1	0.360724	0.765059	0.6	1
C15H16O10	0.562572	0.619624	0.6667	1.0667
C15H16O10N2	0.909872	0.272359	0.6667	1.0667
C15H16O10S1	-0.0611812	0.961027	0.6667	1.0667
C15H16O11	-0.353798	0.76978	0.7333	1.0667
C15H16O2	-0.123065	0.921455	0.1333	1.0667
C15H16O2N2	-0.0481129	0.969359	0.1333	1.0667
C15H16O3	0.056913	0.963749	0.2	1.0667
C15H16O3N2	0.866241	0.333059	0.2	1.0667
C15H16O3S1	-0.974575	0.143865	0.2	1.0667
C15H16O4	-0.166292	0.893641	0.2667	1.0667
C15H16O4N2	0.983195	0.116875	0.2667	1.0667
C15H16O4S1	-0.999596	0.018097	0.2667	1.0667
C15H16O5	0.367163	0.760658	0.3333	1.0667
C15H16O5N2	0.744318	0.46555	0.3333	1.0667
C15H16O5S1	-0.865908	0.333483	0.3333	1.0667
C15H16O6	-0.916647	0.261769	0.4	1.0667
C15H16O6N2	0.736953	0.472528	0.4	1.0667
C15H16O6N2S1	0.810927	0.397926	0.4	1.0667
C15H16O6S1	-0.258785	0.833356	0.4	1.0667
C15H16O7	0.958757	0.183474	0.4667	1.0667
C15H16O7N2	0.786547	0.423734	0.4667	1.0667
C15H16O7N2S1	0.596294	0.593279	0.4667	1.0667
C15H16O7S1	-0.997604	0.044074	0.4667	1.0667
C15H16O8	0.868037	0.330763	0.5333	1.0667
C15H16O8N2	0.783218	0.427154	0.5333	1.0667
C15H16O8N2S1	0.560264	0.6214	0.5333	1.0667
C15H16O8S1	-0.323376	0.790365	0.5333	1.0667
C15H16O9	0.688757	0.516313	0.6	1.0667
C15H16O9N2	-0.00134215	0.999146	0.6	1.0667
C15H16O9S1	-0.254544	0.836149	0.6	1.0667
C15H17O10N1	0.00356406	0.997731	0.6667	1.1333
C15H17O3N1	-0.26963	0.826197	0.2	1.1333
C15H17O4N1	0.932418	0.235389	0.2667	1.1333
C15H17O5N1	0.770826	0.439688	0.3333	1.1333
C15H17O5N1S1	-0.995945	0.0573487	0.3333	1.1333
C15H17O6N1	0.841954	0.36281	0.4	1.1333
C15H17O6N1S1	-0.74706	0.462929	0.4	1.1333
C15H17O7N1	0.923461	0.250695	0.4667	1.1333
C15H17O7N1S1	0.988989	0.0945595	0.4667	1.1333
C15H17O8N1	0.680062	0.523905	0.5333	1.1333
C15H17O8N1S1	0.675504	0.527853	0.5333	1.1333
C15H17O9N1	0.640769	0.557231	0.6	1.1333
C15H17O9N1S1	-0.726202	0.482568	0.6	1.1333
C15H18O10	0.269599	0.826218	0.6667	1.2
C15H18O10S1	0.3952	0.741351	0.6667	1.2
C15H18O11	-0.161243	0.896899	0.7333	1.2
C15H18O2	-0.855069	0.347029	0.1333	1.2
C15H18O2N2	-0.318949	0.79334	0.1333	1.2
C15H18O3	-0.185736	0.881066	0.2	1.2
C15H18O3N2	0.883938	0.309765	0.2	1.2
C15H18O3S1	-0.892804	0.29747	0.2	1.2
C15H18O4	0.151401	0.903243	0.2667	1.2
C15H18O4N2	-0.170562	0.890883	0.2667	1.2
C15H18O4S1	-0.732925	0.476309	0.2667	1.2
C15H18O5	0.917237	0.260829	0.3333	1.2
C15H18O5N2	0.939544	0.222498	0.3333	1.2
C15H18O5S1	-0.0218981	0.986058	0.3333	1.2
C15H18O6	-0.169882	0.891323	0.4	1.2
C15H18O6N2	0.529922	0.644442	0.4	1.2
C15H18O6N2S1	0.848855	0.354585	0.4	1.2
C15H18O6S1	0.214217	0.86256	0.4	1.2
C15H18O7	0.883669	0.310131	0.4667	1.2
C15H18O7N2	0.844565	0.359718	0.4667	1.2
C15H18O7N2S1	0.858986	0.342189	0.4667	1.2
C15H18O7S1	-0.990079	0.0897474	0.4667	1.2
C15H18O8	-0.178654	0.885651	0.5333	1.2
C15H18O8N2	0.712216	0.495383	0.5333	1.2
C15H18O8S1	-0.962639	0.174569	0.5333	1.2
C15H18O9	-0.810595	0.398288	0.6	1.2
C15H18O9N2	0.51285	0.65718	0.6	1.2
C15H18O9S1	-0.873443	0.323764	0.6	1.2
C15H19O10N1	-0.134945	0.913828	0.6667	1.2667
C15H19O2N1	-0.999553	0.019025	0.1333	1.2667
C15H19O3N1	-0.977549	0.135154	0.2	1.2667
C15H19O4N1	0.916823	0.26149	0.2667	1.2667
C15H19O5N1	0.883672	0.310127	0.3333	1.2667
C15H19O5N1S1	0.388722	0.745834	0.3333	1.2667
C15H19O6N1	0.944985	0.212151	0.4	1.2667
C15H19O6N1S1	-0.998282	0.0373174	0.4	1.2667
C15H19O7N1	0.91991	0.256522	0.4667	1.2667
C15H19O7N1S1	-0.403674	0.735466	0.4667	1.2667
C15H19O8N1	0.79395	0.416043	0.5333	1.2667
C15H19O8N1S1	-0.803759	0.40566	0.5333	1.2667
C15H19O9N1	0.470815	0.68792	0.6	1.2667
C15H19O9N1S1	0.796233	0.413646	0.6	1.2667
C15H20O1	0.17643	0.88709	0.0667	1.3333
C15H20O10	-0.752114	0.458068	0.6667	1.3333
C15H20O10S1	-0.0444281	0.971707	0.6667	1.3333
C15H20O11	0.364962	0.762164	0.7333	1.3333
C15H20O2	0.172574	0.889583	0.1333	1.3333
C15H20O3	0.694899	0.510898	0.2	1.3333
C15H20O3N2	0.979146	0.13024	0.2	1.3333
C15H20O3S1	-0.901415	0.285059	0.2	1.3333
C15H20O4	0.0978817	0.937587	0.2667	1.3333
C15H20O4N2	0.586742	0.60082	0.2667	1.3333
C15H20O4S1	-0.156059	0.900242	0.2667	1.3333
C15H20O5	-0.869173	0.329303	0.3333	1.3333
C15H20O5N2	0.899312	0.288136	0.3333	1.3333
C15H20O5S1	-0.955964	0.189629	0.3333	1.3333
C15H20O6	0.961128	0.178087	0.4	1.3333
C15H20O6N2	0.950523	0.201095	0.4	1.3333
C15H20O6S1	-0.998724	0.0321601	0.4	1.3333
C15H20O7	0.895579	0.293523	0.4667	1.3333
C15H20O7N2	0.88029	0.314696	0.4667	1.3333
C15H20O7N2S1	0.999022	0.0281647	0.4667	1.3333
C15H20O7S1	0.0365864	0.976703	0.4667	1.3333
C15H20O8	0.873725	0.323395	0.5333	1.3333
C15H20O8N2	0.776293	0.434196	0.5333	1.3333
C15H20O8S1	-0.999941	0.00691225	0.5333	1.3333
C15H20O9	0.731849	0.477315	0.6	1.3333
C15H20O9N2	0.726511	0.482281	0.6	1.3333
C15H20O9S1	-0.289326	0.813138	0.6	1.3333
C15H21O10N1	0.380409	0.751567	0.6667	1.4
C15H21O3N1	0.463834	0.692947	0.2	1.4
C15H21O4N1	0.804853	0.404489	0.2667	1.4
C15H21O5N1	0.949287	0.203614	0.3333	1.4
C15H21O5N1S1	0.667416	0.5348	0.3333	1.4
C15H21O6N1	0.949388	0.20341	0.4	1.4
C15H21O6N1S1	-0.563123	0.619199	0.4	1.4
C15H21O7N1	0.935417	0.230049	0.4667	1.4
C15H21O7N1S1	0.991071	0.0851353	0.4667	1.4
C15H21O7N3	0.994245	0.068335	0.4667	1.4
C15H21O8N1	0.869152	0.32933	0.5333	1.4
C15H21O8N1S1	-0.949753	0.202668	0.5333	1.4
C15H21O9N1	0.697398	0.508682	0.6	1.4
C15H22O1	-0.219201	0.85931	0.0667	1.4667
C15H22O10	0.675537	0.527824	0.6667	1.4667
C15H22O10S1	0.160813	0.897177	0.6667	1.4667
C15H22O11	0.741904	0.467846	0.7333	1.4667
C15H22O3S1	-0.975408	0.141478	0.2	1.4667
C15H22O4	0.114819	0.926742	0.2667	1.4667
C15H22O4S1	-0.994983	0.0637952	0.2667	1.4667
C15H22O5	-0.736923	0.472556	0.3333	1.4667
C15H22O5N2	0.944879	0.212358	0.3333	1.4667
C15H22O5S1	-0.780564	0.429864	0.3333	1.4667
C15H22O6	0.481221	0.680387	0.4	1.4667
C15H22O6S1	-0.965195	0.168454	0.4	1.4667
C15H22O7	0.80126	0.408327	0.4667	1.4667
C15H22O7N2	0.948856	0.204484	0.4667	1.4667
C15H22O7S1	-0.893194	0.296918	0.4667	1.4667
C15H22O7S2	0.146047	0.90669	0.4667	1.4667
C15H22O8	0.797457	0.412356	0.5333	1.4667
C15H22O8N2	0.70215	0.504447	0.5333	1.4667
C15H22O8S1	0.943825	0.214398	0.5333	1.4667
C15H22O9	0.802684	0.406809	0.6	1.4667
C15H22O9S1	0.372618	0.75692	0.6	1.4667
C15H23O3N1	0.986001	0.106647	0.2	1.5333
C15H23O4N1	-0.567924	0.615493	0.2667	1.5333
C15H23O5N1	0.985747	0.107613	0.3333	1.5333
C15H23O5N1S1	0.620833	0.573589	0.3333	1.5333
C15H23O6N1	0.916549	0.261925	0.4	1.5333
C15H23O6N1S1	0.440011	0.709949	0.4	1.5333
C15H23O6N3	0.992186	0.0796369	0.4	1.5333
C15H23O7N1	0.801563	0.408004	0.4667	1.5333
C15H23O7N1S1	-0.740987	0.468716	0.4667	1.5333
C15H23O8N1	0.836807	0.36884	0.5333	1.5333
C15H23O8N1S1	-0.637709	0.559764	0.5333	1.5333
C15H23O9N1	0.538142	0.638253	0.6	1.5333
C15H24O1	-0.704933	0.501954	0.0667	1.6
C15H24O10	0.659857	0.541234	0.6667	1.6
C15H24O10S1	-0.512913	0.657133	0.6667	1.6
C15H24O3S1	-0.931573	0.236874	0.2	1.6
C15H24O4	-0.971551	0.152218	0.2667	1.6
C15H24O4S1	-0.491481	0.672911	0.2667	1.6
C15H24O5	-0.730877	0.478222	0.3333	1.6
C15H24O5S1	-0.786072	0.424223	0.3333	1.6
C15H24O6	0.746561	0.463407	0.4	1.6
C15H24O6N2	-0.873735	0.323381	0.4	1.6
C15H24O6S1	-0.806368	0.40286	0.4	1.6
C15H24O7	0.606953	0.584783	0.4667	1.6
C15H24O7N2	-0.674447	0.528764	0.4667	1.6
C15H24O7S1	-0.868218	0.330531	0.4667	1.6
C15H24O8	0.901168	0.285423	0.5333	1.6
C15H24O8S1	0.0673703	0.957078	0.5333	1.6
C15H24O9	0.893734	0.296152	0.6	1.6
C15H24O9S1	0.503117	0.664373	0.6	1.6
C15H25O6N1	0.895151	0.294136	0.4	1.6667
C15H25O6N1S1	0.659679	0.541384	0.4	1.6667
C15H25O7N1	-0.613994	0.579124	0.4667	1.6667
C15H25O7N1S1	0.992251	0.0793071	0.4667	1.6667
C15H25O8N1	0.996783	0.0510794	0.5333	1.6667
C15H26O3	-0.993604	0.0720439	0.2	1.7333
C15H26O4	-0.981189	0.123676	0.2667	1.7333
C15H26O4S1	-0.998857	0.0304417	0.2667	1.7333
C15H26O5	-0.949172	0.203847	0.3333	1.7333
C15H26O5S1	-0.690731	0.514578	0.3333	1.7333
C15H26O6	0.964699	0.169657	0.4	1.7333
C15H26O6S1	-0.857394	0.344165	0.4	1.7333
C15H26O7	0.85206	0.350706	0.4667	1.7333
C15H26O7S1	-0.848164	0.355416	0.4667	1.7333
C15H26O8	0.794069	0.415918	0.5333	1.7333
C15H26O8S1	0.412049	0.729627	0.5333	1.7333
C15H26O9	0.832067	0.374314	0.6	1.7333
C15H28O4	-0.992329	0.0789053	0.2667	1.8667
C15H28O5	-0.171375	0.890358	0.3333	1.8667
C15H28O5S1	-0.950706	0.200721	0.3333	1.8667
C15H28O6	-0.979949	0.1277	0.4	1.8667
C15H28O7	-0.953037	0.195879	0.4667	1.8667
C15H28O8	-0.971117	0.153379	0.5333	1.8667
C15H8O5	0.739401	0.470218	0.3333	0.5333
C15H8O6	-0.866994	0.332099	0.4	0.5333
C15H8O6S1	-0.639492	0.55829	0.4	0.5333
C15H8O7	0.775584	0.434911	0.4667	0.5333
C15H8O8	0.789658	0.420516	0.5333	0.5333
C15H9O4N1	-0.339361	0.779578	0.2667	0.6
C15H9O5N1	0.955634	0.190345	0.3333	0.6
C15H9O6N1	0.883419	0.310471	0.4	0.6
C15H9O7N1	0.292909	0.810753	0.4667	0.6
C15H9O8N1	0.507347	0.661253	0.5333	0.6
C16H10O10	0.812057	0.396695	0.625	0.625
C16H10O3	0.139475	0.910917	0.1875	0.625
C16H10O4	-0.843251	0.361277	0.25	0.625
C16H10O5	0.952877	0.196215	0.3125	0.625
C16H10O6	0.920043	0.256307	0.375	0.625
C16H10O6N2	0.948555	0.20509	0.375	0.625
C16H10O7	0.985568	0.108289	0.4375	0.625
C16H10O7S1	0.0280412	0.982146	0.4375	0.625
C16H10O8	0.882358	0.311909	0.5	0.625
C16H10O9	0.81788	0.390298	0.5625	0.625
C16H11O4N1	0.620917	0.573521	0.25	0.6875
C16H11O5N1	0.957816	0.18557	0.3125	0.6875
C16H11O6N1	0.99681	0.0508636	0.375	0.6875
C16H11O7N1	0.648271	0.550984	0.4375	0.6875
C16H11O8N1	0.601053	0.589496	0.5	0.6875
C16H11O9N1	0.843173	0.36137	0.5625	0.6875
C16H12O10	0.916614	0.261823	0.625	0.75
C16H12O11	0.763026	0.447426	0.6875	0.75
C16H12O2	-0.563545	0.618875	0.125	0.75
C16H12O3	0.0625019	0.960184	0.1875	0.75
C16H12O4	0.899391	0.288021	0.25	0.75
C16H12O4N2	0.997624	0.0438982	0.25	0.75
C16H12O5N2	-0.477854	0.68283	0.3125	0.75
C16H12O6	0.99986	0.0106486	0.375	0.75
C16H12O6N2	0.793675	0.41633	0.375	0.75
C16H12O6S1	-0.730912	0.47819	0.375	0.75
C16H12O7	0.999995	0.00203328	0.4375	0.75
C16H12O7N2	0.988599	0.0962246	0.4375	0.75
C16H12O7S1	0.996588	0.0526055	0.4375	0.75
C16H12O8	0.590012	0.598246	0.5	0.75
C16H12O8N2	0.91513	0.264175	0.5	0.75
C16H12O8S1	0.970815	0.154184	0.5	0.75
C16H12O9	0.970589	0.154782	0.5625	0.75
C16H12O9N2	0.773971	0.436535	0.5625	0.75
C16H12O9S1	0.933201	0.234006	0.5625	0.75
C16H13O10N1	0.539253	0.637413	0.625	0.8125
C16H13O3N1	-0.802711	0.40678	0.1875	0.8125
C16H13O4N1	0.963075	0.173539	0.25	0.8125
C16H13O5N1	0.971298	0.152897	0.3125	0.8125
C16H13O6N1	0.970203	0.155799	0.375	0.8125
C16H13O7N1	0.944047	0.21397	0.4375	0.8125
C16H13O8N1	0.994499	0.0668049	0.5	0.8125
C16H13O8N1S1	0.91275	0.267909	0.5	0.8125
C16H13O9N1	0.974275	0.144712	0.5625	0.8125
C16H14O10	0.931922	0.236262	0.625	0.875
C16H14O11	0.699186	0.507091	0.6875	0.875
C16H14O2	-0.728243	0.480674	0.125	0.875
C16H14O3	-0.928455	0.242275	0.1875	0.875
C16H14O4	-0.982338	0.119826	0.25	0.875
C16H14O4N2	-0.958324	0.184441	0.25	0.875
C16H14O5N2	0.99994	0.00699112	0.3125	0.875
C16H14O5S1	-0.957256	0.186806	0.3125	0.875
C16H14O6	0.99866	0.0329586	0.375	0.875
C16H14O6N2	0.995246	0.062103	0.375	0.875
C16H14O6S1	-0.074713	0.952392	0.375	0.875
C16H14O7	0.968661	0.159801	0.4375	0.875
C16H14O7N2	0.864778	0.334919	0.4375	0.875
C16H14O7S1	0.241756	0.844554	0.4375	0.875
C16H14O8	0.997994	0.040328	0.5	0.875
C16H14O8N2	0.76478	0.445695	0.5	0.875
C16H14O8S1	0.402552	0.736247	0.5	0.875
C16H14O9	-0.834837	0.371124	0.5625	0.875
C16H14O9N2	0.612598	0.580249	0.5625	0.875
C16H14O9S1	0.7177	0.49039	0.5625	0.875
C16H15O10N1	0.670785	0.531914	0.625	0.9375
C16H15O3N1	-0.990136	0.0894908	0.1875	0.9375
C16H15O4N1	-0.951895	0.198265	0.25	0.9375
C16H15O5N1	0.594568	0.594646	0.3125	0.9375
C16H15O6N1	0.886756	0.305907	0.375	0.9375
C16H15O6N1S1	0.906968	0.276782	0.375	0.9375
C16H15O7N1	0.988556	0.0964043	0.4375	0.9375
C16H15O7N1S1	0.988613	0.0961642	0.4375	0.9375
C16H15O8N1	0.94522	0.211694	0.5	0.9375
C16H15O8N1S1	0.960796	0.178851	0.5	0.9375
C16H15O9N1	0.85094	0.352066	0.5625	0.9375
C16H16O10	0.445669	0.705932	0.625	1
C16H16O10N2	0.873318	0.323927	0.625	1
C16H16O10S1	-0.119467	0.923763	0.625	1
C16H16O11	0.0860428	0.945156	0.6875	1
C16H16O12	-0.444303	0.706903	0.75	1
C16H16O2	-0.98932	0.0931254	0.125	1
C16H16O3	-0.876362	0.319927	0.1875	1
C16H16O3N2	0.934553	0.2316	0.1875	1
C16H16O3S1	-0.818225	0.389917	0.1875	1
C16H16O4	0.70135	0.505162	0.25	1
C16H16O4N2	0.736358	0.473088	0.25	1
C16H16O4S1	-0.934109	0.232392	0.25	1
C16H16O5	0.233732	0.849812	0.3125	1
C16H16O5N2	0.997217	0.0475045	0.3125	1
C16H16O5S1	-0.950625	0.200887	0.3125	1
C16H16O6	0.997095	0.0485383	0.375	1
C16H16O6N2	0.54352	0.634182	0.375	1
C16H16O6N2S1	0.937911	0.225515	0.375	1
C16H16O6S1	-0.691877	0.513568	0.375	1
C16H16O7	-0.169579	0.891518	0.4375	1
C16H16O7N2	-0.779214	0.431237	0.4375	1
C16H16O7S1	-0.780847	0.429576	0.4375	1
C16H16O8	0.851259	0.35168	0.5	1
C16H16O8N2	0.904894	0.279899	0.5	1
C16H16O8S1	0.777145	0.433334	0.5	1
C16H16O9	-0.722864	0.48565	0.5625	1
C16H16O9N2	0.679199	0.524655	0.5625	1
C16H16O9S1	-0.462359	0.694006	0.5625	1
C16H17O10N1	0.779775	0.430667	0.625	1.0625
C16H17O3N1	-0.473553	0.685942	0.1875	1.0625
C16H17O3P1	-0.974382	0.144411	0.1875	1.0625
C16H17O4N1	0.780798	0.429626	0.25	1.0625
C16H17O5N1	0.532961	0.642159	0.3125	1.0625
C16H17O5N1S1	0.933449	0.233566	0.3125	1.0625
C16H17O6N1	-0.874411	0.322497	0.375	1.0625
C16H17O6N1S1	0.48499	0.677646	0.375	1.0625
C16H17O7N1	0.940715	0.220311	0.4375	1.0625
C16H17O7N1S1	0.96262	0.174614	0.4375	1.0625
C16H17O8N1	0.70927	0.49805	0.5	1.0625
C16H17O8N1S1	-0.767383	0.443117	0.5	1.0625
C16H17O9N1	0.721887	0.48655	0.5625	1.0625
C16H17O9N1S1	0.962171	0.175666	0.5625	1.0625
C16H18O10	0.499418	0.667095	0.625	1.125
C16H18O10N2	0.625728	0.569604	0.625	1.125
C16H18O10S1	0.999999	0.001	0.625	1.125
C16H18O11	0.19177	0.877154	0.6875	1.125
C16H18O11S1	-0.781306	0.429108	0.6875	1.125
C16H18O12	-0.305006	0.802683	0.75	1.125
C16H18O2	-0.970957	0.153805	0.125	1.125
C16H18O3	-0.955938	0.189686	0.1875	1.125
C16H18O3S1	-0.969595	0.157388	0.1875	1.125
C16H18O4	-0.242372	0.844149	0.25	1.125
C16H18O4N2	0.912825	0.267792	0.25	1.125
C16H18O4S1	-0.988149	0.0981079	0.25	1.125
C16H18O5	-0.782183	0.428212	0.3125	1.125
C16H18O5N2	-0.169739	0.891415	0.3125	1.125
C16H18O5S1	-0.922032	0.253055	0.3125	1.125
C16H18O6	0.35729	0.767402	0.375	1.125
C16H18O6N2	0.813638	0.394968	0.375	1.125
C16H18O6N2S1	0.687771	0.517179	0.375	1.125
C16H18O6S1	-0.990372	0.0884103	0.375	1.125
C16H18O7	0.949107	0.203977	0.4375	1.125
C16H18O7N2	0.901665	0.284691	0.4375	1.125
C16H18O7N2S1	0.480272	0.681076	0.4375	1.125
C16H18O7S1	-0.929676	0.240173	0.4375	1.125
C16H18O8	0.927648	0.243654	0.5	1.125
C16H18O8N2	0.926479	0.24564	0.5	1.125
C16H18O8N2S1	0.95395	0.193951	0.5	1.125
C16H18O8S1	-0.893881	0.295944	0.5	1.125
C16H18O9	0.746906	0.463077	0.5625	1.125
C16H18O9N2	0.790048	0.420112	0.5625	1.125
C16H18O9S1	-0.320892	0.792035	0.5625	1.125
C16H19O10N1	0.187124	0.880167	0.625	1.1875
C16H19O11N1	0.0125183	0.99203	0.6875	1.1875
C16H19O3N1	-0.126878	0.919008	0.1875	1.1875
C16H19O4N1	0.801035	0.408566	0.25	1.1875
C16H19O5N1	0.936863	0.22743	0.3125	1.1875
C16H19O5N1S1	-0.749432	0.460654	0.3125	1.1875
C16H19O6N1	0.928055	0.242959	0.375	1.1875
C16H19O6N1S1	-0.962806	0.174175	0.375	1.1875
C16H19O7N1	0.933017	0.234331	0.4375	1.1875
C16H19O7N1S1	0.905584	0.278866	0.4375	1.1875
C16H19O8N1	0.93004	0.239544	0.5	1.1875
C16H19O8N1S1	-0.591753	0.596872	0.5	1.1875
C16H19O9N1	0.747722	0.462295	0.5625	1.1875
C16H19O9N1S1	-0.970802	0.154218	0.5625	1.1875
C16H20O10	0.716756	0.491252	0.625	1.25
C16H20O10N2	0.827482	0.379545	0.625	1.25
C16H20O10S1	0.0266454	0.983035	0.625	1.25
C16H20O11	0.62268	0.572088	0.6875	1.25
C16H20O11S1	-0.596229	0.59333	0.6875	1.25
C16H20O12	-0.314669	0.796213	0.75	1.25
C16H20O2	0.611022	0.581517	0.125	1.25
C16H20O3	-0.931253	0.237434	0.1875	1.25
C16H20O3N2	0.150659	0.903721	0.1875	1.25
C16H20O4	-0.238173	0.846903	0.25	1.25
C16H20O4N2	0.993384	0.0732727	0.25	1.25
C16H20O4S1	-0.00441975	0.997186	0.25	1.25
C16H20O5	-0.194524	0.875368	0.3125	1.25
C16H20O5N2	0.953599	0.194694	0.3125	1.25
C16H20O5N2S1	0.260954	0.831926	0.3125	1.25
C16H20O5S1	-0.957629	0.185984	0.3125	1.25
C16H20O6	-0.18213	0.883402	0.375	1.25
C16H20O6N2	0.959874	0.180956	0.375	1.25
C16H20O6N2S1	0.999601	0.017989	0.375	1.25
C16H20O6S1	-0.985951	0.106837	0.375	1.25
C16H20O7	0.948143	0.205917	0.4375	1.25
C16H20O7N2	0.836858	0.36878	0.4375	1.25
C16H20O7N2S1	0.553703	0.626428	0.4375	1.25
C16H20O7S1	-0.97903	0.130604	0.4375	1.25
C16H20O8	-0.726078	0.482682	0.5	1.25
C16H20O8N2	0.888587	0.303375	0.5	1.25
C16H20O8N2S1	0.684753	0.51982	0.5	1.25
C16H20O8S1	-0.929603	0.240299	0.5	1.25
C16H20O9	0.823942	0.38354	0.5625	1.25
C16H20O9N2	0.46378	0.692986	0.5625	1.25
C16H20O9N2S1	0.189067	0.878907	0.5625	1.25
C16H20O9S1	-0.990112	0.0895988	0.5625	1.25
C16H21O10N1	0.358775	0.766389	0.625	1.3125
C16H21O11N1	0.0363887	0.976829	0.6875	1.3125
C16H21O3N1	0.972067	0.150824	0.1875	1.3125
C16H21O4N1	0.992032	0.0804179	0.25	1.3125
C16H21O5N1	0.853616	0.348809	0.3125	1.3125
C16H21O5N1S1	0.0140283	0.991069	0.3125	1.3125
C16H21O6N1	0.980564	0.125722	0.375	1.3125
C16H21O6N1S1	-0.715328	0.492555	0.375	1.3125
C16H21O7N1	0.970099	0.156071	0.4375	1.3125
C16H21O7N1S1	0.103618	0.933916	0.4375	1.3125
C16H21O8N1	0.925455	0.247366	0.5	1.3125
C16H21O8N1S1	-0.616265	0.57729	0.5	1.3125
C16H21O9N1	0.667818	0.534457	0.5625	1.3125
C16H21O9N1S1	-0.437829	0.711495	0.5625	1.3125
C16H22O1	-0.468537	0.689562	0.0625	1.375
C16H22O10	-0.733863	0.475431	0.625	1.375
C16H22O10S1	0.484353	0.67811	0.625	1.375
C16H22O11	0.393785	0.742331	0.6875	1.375
C16H22O11S1	0.0499701	0.968175	0.6875	1.375
C16H22O2	0.159811	0.897823	0.125	1.375
C16H22O3	0.896217	0.292608	0.1875	1.375
C16H22O3S1	-0.333757	0.783367	0.1875	1.375
C16H22O4	0.892651	0.297685	0.25	1.375
C16H22O4N2	-0.861327	0.339267	0.25	1.375
C16H22O4S1	-0.977296	0.135918	0.25	1.375
C16H22O5	-0.95526	0.191151	0.3125	1.375
C16H22O5N2	-0.579555	0.606453	0.3125	1.375
C16H22O5S1	-0.779953	0.430486	0.3125	1.375
C16H22O6	0.913224	0.26717	0.375	1.375
C16H22O6N2	-0.885091	0.308192	0.375	1.375
C16H22O6N2S1	0.987721	0.0998683	0.375	1.375
C16H22O6S1	-0.999656	0.0167057	0.375	1.375
C16H22O7	0.934226	0.232184	0.4375	1.375
C16H22O7N2	0.846421	0.357506	0.4375	1.375
C16H22O7N2S1	-0.973537	0.146782	0.4375	1.375
C16H22O7S1	-0.974225	0.144854	0.4375	1.375
C16H22O8	0.809129	0.399879	0.5	1.375
C16H22O8N2	0.903798	0.281534	0.5	1.375
C16H22O8S1	-0.928468	0.242252	0.5	1.375
C16H22O9	-0.798674	0.41107	0.5625	1.375
C16H22O9N2	0.74718	0.462815	0.5625	1.375
C16H22O9N2S1	0.0206319	0.986864	0.5625	1.375
C16H22O9S1	0.958159	0.184808	0.5625	1.375
C16H23O10N1	0.190949	0.877687	0.625	1.4375
C16H23O4N1	0.53478	0.640789	0.25	1.4375
C16H23O5N1	0.892783	0.297499	0.3125	1.4375
C16H23O5N1S1	-0.480646	0.680804	0.3125	1.4375
C16H23O6N1	0.83637	0.369347	0.375	1.4375
C16H23O6N1S1	-0.969673	0.157187	0.375	1.4375
C16H23O7N1	0.95137	0.199354	0.4375	1.4375
C16H23O7N1S1	0.990326	0.0886214	0.4375	1.4375
C16H23O7N3	0.884235	0.309361	0.4375	1.4375
C16H23O8N1	0.926435	0.245713	0.5	1.4375
C16H23O8N1S1	-0.503381	0.664179	0.5	1.4375
C16H23O9N1	0.621188	0.5733	0.5625	1.4375
C16H24O10	0.7681	0.442404	0.625	1.5
C16H24O10S1	0.496612	0.669154	0.625	1.5
C16H24O11	0.403387	0.735666	0.6875	1.5
C16H24O2	-0.932016	0.236097	0.125	1.5
C16H24O3S1	-0.957364	0.186568	0.1875	1.5
C16H24O4	-0.940434	0.220837	0.25	1.5
C16H24O4S1	-0.976776	0.137469	0.25	1.5
C16H24O5	0.767729	0.442773	0.3125	1.5
C16H24O5S1	-0.97248	0.149699	0.3125	1.5
C16H24O6	0.898809	0.288867	0.375	1.5
C16H24O6N2	-0.991936	0.0809008	0.375	1.5
C16H24O6S1	-0.999924	0.00783573	0.375	1.5
C16H24O7	0.96665	0.164875	0.4375	1.5
C16H24O7N2	0.998223	0.0379621	0.4375	1.5
C16H24O7S1	-0.990837	0.0862457	0.4375	1.5
C16H24O8	0.924599	0.2488	0.5	1.5
C16H24O8N2	0.813606	0.395002	0.5	1.5
C16H24O8S1	0.999764	0.0138431	0.5	1.5
C16H24O9	0.64879	0.550551	0.5625	1.5
C16H24O9N2	0.58514	0.602079	0.5625	1.5
C16H24O9S1	0.873902	0.323163	0.5625	1.5
C16H25O10N1	0.236928	0.847719	0.625	1.5625
C16H25O4N1	-0.583272	0.603544	0.25	1.5625
C16H25O5N1	0.865167	0.334425	0.3125	1.5625
C16H25O6N1	0.973018	0.148221	0.375	1.5625
C16H25O6N1S1	-0.893856	0.295979	0.375	1.5625
C16H25O6N3	0.01781	0.988661	0.375	1.5625
C16H25O6N5S2	0.963211	0.173219	0.375	1.5625
C16H25O7N1	0.549306	0.629785	0.4375	1.5625
C16H25O7N1S1	0.100922	0.935642	0.4375	1.5625
C16H25O8N1	0.941496	0.21884	0.5	1.5625
C16H25O9N1	0.361071	0.764822	0.5625	1.5625
C16H26O10	0.840616	0.364386	0.625	1.625
C16H26O10S1	0.241887	0.844467	0.625	1.625
C16H26O2	-0.748045	0.461986	0.125	1.625
C16H26O3	-0.53841	0.63805	0.1875	1.625
C16H26O4	-0.898987	0.288609	0.25	1.625
C16H26O4S1	0.076622	0.951173	0.25	1.625
C16H26O5	0.953871	0.194118	0.3125	1.625
C16H26O5S1	-0.927012	0.244736	0.3125	1.625
C16H26O6	0.862171	0.338209	0.375	1.625
C16H26O6S1	-0.998214	0.0380522	0.375	1.625
C16H26O7	0.857071	0.344564	0.4375	1.625
C16H26O7N2	-0.579932	0.606158	0.4375	1.625
C16H26O7S1	-0.820126	0.387806	0.4375	1.625
C16H26O8	-0.751357	0.458799	0.5	1.625
C16H26O8S1	0.763104	0.447349	0.5	1.625
C16H26O9	0.898322	0.289574	0.5625	1.625
C16H26O9S1	-0.286176	0.815232	0.5625	1.625
C16H27O6N1	-0.401734	0.736816	0.375	1.6875
C16H27O7N1	0.156006	0.900276	0.4375	1.6875
C16H27O7N1S1	0.85583	0.346094	0.4375	1.6875
C16H27O8N1	0.494257	0.670881	0.5	1.6875
C16H28O3	-0.999084	0.0272578	0.1875	1.75
C16H28O5	0.397035	0.740078	0.3125	1.75
C16H28O5S1	-0.987531	0.100637	0.3125	1.75
C16H28O6	0.600003	0.590332	0.375	1.75
C16H28O6S1	-0.91584	0.263052	0.375	1.75
C16H28O7	0.856314	0.345498	0.4375	1.75
C16H28O7S1	-0.978953	0.130845	0.4375	1.75
C16H28O8	0.707176	0.499938	0.5	1.75
C16H28O9	0.972609	0.149346	0.5625	1.75
C16H30O11	-0.337312	0.780965	0.6875	1.875
C16H30O5	-0.930414	0.238895	0.3125	1.875
C16H30O6	0.457739	0.697319	0.375	1.875
C16H32O3S1	0.999556	0.0189722	0.1875	2
C16H34O4S1	0.878386	0.317242	0.25	2.125
C16H34O5S1	0.775647	0.434847	0.3125	2.125
C16H34O6S1	0.999987	0.00319959	0.375	2.125
C16H8O6	0.968296	0.160734	0.375	0.5
C16H8O7	0.900192	0.286852	0.4375	0.5
C16H8O8	0.896756	0.291835	0.5	0.5
C16H9O6N1	0.99194	0.0808832	0.375	0.5625
C16H9O7N1	0.999842	0.0113117	0.4375	0.5625
C16H9O8N1	0.747447	0.462559	0.5	0.5625
C17H10O10	0.774906	0.435594	0.5882	0.5882
C17H10O5	-0.779317	0.431132	0.2941	0.5882
C17H10O6	0.982868	0.118011	0.3529	0.5882
C17H10O7	-0.853851	0.348522	0.4118	0.5882
C17H10O8	0.974524	0.144007	0.4706	0.5882
C17H10O9	0.958773	0.183438	0.5294	0.5882
C17H11O4N1	0.969741	0.157008	0.2353	0.6471
C17H11O5N1	0.987917	0.0990658	0.2941	0.6471
C17H11O6N1	0.933689	0.233141	0.3529	0.6471
C17H11O7N1	0.998983	0.0287187	0.4118	0.6471
C17H11O8N1	0.982399	0.119621	0.4706	0.6471
C17H11O9N1	0.688731	0.516336	0.5294	0.6471
C17H12O10	0.947069	0.208057	0.5882	0.7059
C17H12O11	0.131224	0.916219	0.6471	0.7059
C17H12O3	0.264374	0.829669	0.1765	0.7059
C17H12O4	-0.178304	0.885878	0.2353	0.7059
C17H12O5	0.0633956	0.959614	0.2941	0.7059
C17H12O5N2	-0.276151	0.821882	0.2941	0.7059
C17H12O6	0.998295	0.0371844	0.3529	0.7059
C17H12O6N2	0.961095	0.178162	0.3529	0.7059
C17H12O7	0.99543	0.0608884	0.4118	0.7059
C17H12O7N2	0.842779	0.361836	0.4118	0.7059
C17H12O8	0.970784	0.154265	0.4706	0.7059
C17H12O8N2	0.997598	0.0441335	0.4706	0.7059
C17H12O9	0.999199	0.025479	0.5294	0.7059
C17H13O10N1	0.266073	0.828547	0.5882	0.7647
C17H13O4N1	0.871586	0.326184	0.2353	0.7647
C17H13O5N1	-0.0871548	0.944445	0.2941	0.7647
C17H13O6N1	0.999462	0.0208749	0.3529	0.7647
C17H13O7N1	0.993311	0.0736719	0.4118	0.7647
C17H13O8N1	0.90223	0.283858	0.4706	0.7647
C17H13O9N1	0.971783	0.151591	0.5294	0.7647
C17H14O10	0.59302	0.595871	0.5882	0.8235
C17H14O11	0.674941	0.528338	0.6471	0.8235
C17H14O12	0.489614	0.674275	0.7059	0.8235
C17H14O3	-0.959988	0.180696	0.1765	0.8235
C17H14O4	-0.901574	0.284825	0.2353	0.8235
C17H14O4N2	-0.771557	0.438956	0.2353	0.8235
C17H14O5N2	-0.187106	0.880178	0.2941	0.8235
C17H14O6	0.253519	0.836824	0.3529	0.8235
C17H14O6N2	0.896996	0.291489	0.3529	0.8235
C17H14O6S1	-0.565449	0.617406	0.3529	0.8235
C17H14O7	0.992911	0.0758468	0.4118	0.8235
C17H14O7N2	0.954871	0.191986	0.4118	0.8235
C17H14O7S1	-0.883043	0.310982	0.4118	0.8235
C17H14O8	0.99952	0.0197306	0.4706	0.8235
C17H14O8N2	0.931993	0.236137	0.4706	0.8235
C17H14O8S1	0.741389	0.468335	0.4706	0.8235
C17H14O9	0.536176	0.639737	0.5294	0.8235
C17H14O9N2	0.498175	0.668007	0.5294	0.8235
C17H14O9S1	-0.471817	0.687197	0.5294	0.8235
C17H15O10N1	0.806418	0.402806	0.5882	0.8824
C17H15O11N1	-0.181	0.884133	0.6471	0.8824
C17H15O4N1	0.607285	0.584517	0.2353	0.8824
C17H15O5N1	-0.942044	0.217804	0.2941	0.8824
C17H15O6N1	0.925846	0.246709	0.3529	0.8824
C17H15O7N1	0.972823	0.148759	0.4118	0.8824
C17H15O8N1	0.848639	0.354846	0.4706	0.8824
C17H15O9N1	0.994842	0.0646878	0.5294	0.8824
C17H16O10	0.821822	0.385916	0.5882	0.9412
C17H16O10N2	0.495974	0.669623	0.5882	0.9412
C17H16O10S1	-0.998726	0.0321331	0.5882	0.9412
C17H16O11	-0.805975	0.403283	0.6471	0.9412
C17H16O12	-0.398254	0.739232	0.7059	0.9412
C17H16O13	-0.20576	0.868067	0.7647	0.9412
C17H16O3	-0.860042	0.340875	0.1765	0.9412
C17H16O4	0.0612735	0.960968	0.2353	0.9412
C17H16O5N2	0.387369	0.746768	0.2941	0.9412
C17H16O5S1	-0.626016	0.569369	0.2941	0.9412
C17H16O6	-0.968658	0.159809	0.3529	0.9412
C17H16O6N2	0.583926	0.603031	0.3529	0.9412
C17H16O6S1	-0.895425	0.293744	0.3529	0.9412
C17H16O7	0.987945	0.0989518	0.4118	0.9412
C17H16O7N2	0.979141	0.130258	0.4118	0.9412
C17H16O7S1	-0.962079	0.175881	0.4118	0.9412
C17H16O8	0.44586	0.705796	0.4706	0.9412
C17H16O8N2	0.650266	0.549315	0.4706	0.9412
C17H16O8S1	-0.0110462	0.992968	0.4706	0.9412
C17H16O9	0.981758	0.121786	0.5294	0.9412
C17H16O9N2	0.711926	0.495647	0.5294	0.9412
C17H16O9S1	0.904516	0.280465	0.5294	0.9412
C17H17O10N1	-0.0918949	0.941415	0.5882	1
C17H17O11N1	-0.370088	0.758655	0.6471	1
C17H17O4N1	0.918953	0.258072	0.2353	1
C17H17O5N1	-0.998917	0.0296325	0.2941	1
C17H17O6N1	0.992578	0.0776123	0.3529	1
C17H17O7N1	0.937684	0.225931	0.4118	1
C17H17O7N1S1	0.302281	0.804504	0.4118	1
C17H17O8N1	0.957734	0.185751	0.4706	1
C17H17O8N1S1	-0.416684	0.726384	0.4706	1
C17H17O9N1	0.74635	0.463609	0.5294	1
C17H17O9N1S1	0.536721	0.639325	0.5294	1
C17H18O10	-0.195995	0.874413	0.5882	1.0588
C17H18O10N2	0.589708	0.598485	0.5882	1.0588
C17H18O10S1	0.901151	0.285447	0.5882	1.0588
C17H18O11	0.275232	0.82249	0.6471	1.0588
C17H18O12	-0.893653	0.296268	0.7059	1.0588
C17H18O13	-0.875481	0.321089	0.7647	1.0588
C17H18O2	-0.984412	0.112553	0.1176	1.0588
C17H18O3	-0.884761	0.308643	0.1765	1.0588
C17H18O4	-0.958019	0.185119	0.2353	1.0588
C17H18O5	0.675784	0.52761	0.2941	1.0588
C17H18O5N2	-0.712754	0.494895	0.2941	1.0588
C17H18O5S1	-0.065114	0.958518	0.2941	1.0588
C17H18O6	-0.947662	0.206879	0.3529	1.0588
C17H18O6N2	0.980238	0.126772	0.3529	1.0588
C17H18O6S1	0.993527	0.0724735	0.3529	1.0588
C17H18O7	0.999698	0.0156504	0.4118	1.0588
C17H18O7N2	0.937421	0.226414	0.4118	1.0588
C17H18O7N2S1	-0.661165	0.540125	0.4118	1.0588
C17H18O7S1	-0.747634	0.46238	0.4118	1.0588
C17H18O8	0.959416	0.181993	0.4706	1.0588
C17H18O8N2	0.902692	0.283175	0.4706	1.0588
C17H18O8N2S1	0.758827	0.451545	0.4706	1.0588
C17H18O8S1	-0.896312	0.292472	0.4706	1.0588
C17H18O9	0.393446	0.742566	0.5294	1.0588
C17H18O9N2	0.893367	0.296673	0.5294	1.0588
C17H18O9N2S1	-0.694516	0.511238	0.5294	1.0588
C17H18O9S1	0.950517	0.201108	0.5294	1.0588
C17H19O10N1	0.167268	0.893011	0.5882	1.1176
C17H19O11N1	-0.477909	0.68279	0.6471	1.1176
C17H19O3P1	-0.981436	0.122858	0.1765	1.1176
C17H19O4N1	0.63214	0.564354	0.2353	1.1176
C17H19O5N1	0.808461	0.400601	0.2941	1.1176
C17H19O6N1	0.9402	0.221275	0.3529	1.1176
C17H19O7N1	0.931857	0.236375	0.4118	1.1176
C17H19O7N1S1	-0.780928	0.429493	0.4118	1.1176
C17H19O8N1	0.921633	0.25371	0.4706	1.1176
C17H19O8N1S1	0.974138	0.145098	0.4706	1.1176
C17H19O9N1	0.838173	0.367248	0.5294	1.1176
C17H19O9N1S1	0.999061	0.0275889	0.5294	1.1176
C17H20O10	0.740242	0.469421	0.5882	1.1765
C17H20O10N2	0.0290832	0.981482	0.5882	1.1765
C17H20O10S1	0.919811	0.256683	0.5882	1.1765
C17H20O11	0.338707	0.780021	0.6471	1.1765
C17H20O11S1	0.102467	0.934653	0.6471	1.1765
C17H20O12	0.141305	0.909741	0.7059	1.1765
C17H20O13	-0.243951	0.843113	0.7647	1.1765
C17H20O2	-0.984988	0.110447	0.1176	1.1765
C17H20O3	-0.279552	0.819628	0.1765	1.1765
C17H20O4	-0.917718	0.260059	0.2353	1.1765
C17H20O4N2	0.866466	0.332772	0.2353	1.1765
C17H20O5	-0.747464	0.462542	0.2941	1.1765
C17H20O5N2	0.485053	0.677601	0.2941	1.1765
C17H20O5S1	-0.999129	0.0265708	0.2941	1.1765
C17H20O6	0.234473	0.849327	0.3529	1.1765
C17H20O6N2	0.990144	0.0894542	0.3529	1.1765
C17H20O6S1	-0.870421	0.327693	0.3529	1.1765
C17H20O7	-0.916586	0.261867	0.4118	1.1765
C17H20O7N2	0.999281	0.0241378	0.4118	1.1765
C17H20O7N2S1	0.920218	0.256022	0.4118	1.1765
C17H20O7S1	-0.963284	0.173046	0.4118	1.1765
C17H20O8	0.957447	0.186386	0.4706	1.1765
C17H20O8N2	0.98719	0.102008	0.4706	1.1765
C17H20O8N2S1	0.339307	0.779615	0.4706	1.1765
C17H20O8S1	-0.855502	0.346497	0.4706	1.1765
C17H20O9	0.78175	0.428654	0.5294	1.1765
C17H20O9N2	0.765258	0.445222	0.5294	1.1765
C17H20O9N2S1	-0.130167	0.916897	0.5294	1.1765
C17H20O9S1	0.42136	0.723105	0.5294	1.1765
C17H21O10N1	0.46808	0.689892	0.5882	1.2353
C17H21O11N1	-0.267325	0.82772	0.6471	1.2353
C17H21O2N3	0.95579	0.190007	0.1176	1.2353
C17H21O3N1	-0.646243	0.552678	0.1765	1.2353
C17H21O4N1	-0.93028	0.239129	0.2353	1.2353
C17H21O5N1	0.817365	0.390868	0.2941	1.2353
C17H21O6N1	0.957026	0.187312	0.3529	1.2353
C17H21O6N1S1	-0.16609	0.893771	0.3529	1.2353
C17H21O7N1	0.968139	0.161132	0.4118	1.2353
C17H21O7N1S1	0.16389	0.895191	0.4118	1.2353
C17H21O8N1	0.9707	0.154489	0.4706	1.2353
C17H21O8N1S1	-0.998955	0.0291066	0.4706	1.2353
C17H21O9N1	0.819278	0.388749	0.5294	1.2353
C17H21O9N1S1	-0.122766	0.921647	0.5294	1.2353
C17H22O10	0.737901	0.471634	0.5882	1.2941
C17H22O10N2	0.571683	0.612582	0.5882	1.2941
C17H22O10S1	0.999015	0.0282635	0.5882	1.2941
C17H22O11	0.557181	0.623766	0.6471	1.2941
C17H22O11S1	-0.406067	0.7338	0.6471	1.2941
C17H22O12	0.545398	0.632757	0.7059	1.2941
C17H22O2	-0.978587	0.131981	0.1176	1.2941
C17H22O3	-0.768197	0.442308	0.1765	1.2941
C17H22O4	-0.748536	0.461514	0.2353	1.2941
C17H22O4N2	-0.996936	0.0498468	0.2353	1.2941
C17H22O4S1	-0.972626	0.1493	0.2353	1.2941
C17H22O5	-0.946059	0.210052	0.2941	1.2941
C17H22O5N2	0.732023	0.477153	0.2941	1.2941
C17H22O5S1	-0.979709	0.128466	0.2941	1.2941
C17H22O6	0.995738	0.0587969	0.3529	1.2941
C17H22O6N2	0.553187	0.626823	0.3529	1.2941
C17H22O6S1	0.211626	0.864248	0.3529	1.2941
C17H22O7	0.999277	0.0242129	0.4118	1.2941
C17H22O7N2	-0.888985	0.302822	0.4118	1.2941
C17H22O7S1	-0.973138	0.147892	0.4118	1.2941
C17H22O8	0.971458	0.152467	0.4706	1.2941
C17H22O8N2	0.913324	0.267014	0.4706	1.2941
C17H22O8N2S1	0.821501	0.386275	0.4706	1.2941
C17H22O8S1	-0.999479	0.0205439	0.4706	1.2941
C17H22O9	0.866872	0.332254	0.5294	1.2941
C17H22O9N2	0.717653	0.490433	0.5294	1.2941
C17H22O9N2S1	0.837165	0.368423	0.5294	1.2941
C17H22O9S1	-0.535729	0.640074	0.5294	1.2941
C17H23O10N1	0.722033	0.486416	0.5882	1.3529
C17H23O11N1	-0.0833989	0.946845	0.6471	1.3529
C17H23O4N1	0.858703	0.342542	0.2353	1.3529
C17H23O5N1	0.295342	0.809133	0.2941	1.3529
C17H23O6N1	0.801659	0.407902	0.3529	1.3529
C17H23O6N1S1	-0.0640753	0.95918	0.3529	1.3529
C17H23O7N1	0.878217	0.317467	0.4118	1.3529
C17H23O7N1S1	-0.639193	0.558537	0.4118	1.3529
C17H23O8N1	0.951897	0.198262	0.4706	1.3529
C17H23O8N1S1	-0.904651	0.280263	0.4706	1.3529
C17H23O9N1	0.839163	0.366091	0.5294	1.3529
C17H23O9N1S1	-0.975349	0.141648	0.5294	1.3529
C17H23O9N3	0.0186439	0.98813	0.5294	1.3529
C17H24O10	0.967214	0.163469	0.5882	1.4118
C17H24O10S1	0.659596	0.541455	0.5882	1.4118
C17H24O11	0.595596	0.593831	0.6471	1.4118
C17H24O11S1	-0.75258	0.457619	0.6471	1.4118
C17H24O12	0.0983337	0.937298	0.7059	1.4118
C17H24O2	0.807883	0.401227	0.1176	1.4118
C17H24O3	0.0681402	0.956587	0.1765	1.4118
C17H24O3S1	-0.910118	0.271982	0.1765	1.4118
C17H24O4	-0.999956	0.00598313	0.2353	1.4118
C17H24O4S1	-0.97542	0.141443	0.2353	1.4118
C17H24O5	-0.925347	0.247548	0.2941	1.4118
C17H24O5S1	-0.783906	0.426449	0.2941	1.4118
C17H24O6	-0.612501	0.580327	0.3529	1.4118
C17H24O6N2	0.195577	0.874684	0.3529	1.4118
C17H24O6S1	-0.999972	0.00474462	0.3529	1.4118
C17H24O7	0.493714	0.671278	0.4118	1.4118
C17H24O7N2	0.794229	0.41575	0.4118	1.4118
C17H24O7S1	-0.973396	0.147175	0.4118	1.4118
C17H24O8	0.804572	0.404789	0.4706	1.4118
C17H24O8N2	0.817639	0.390566	0.4706	1.4118
C17H24O8S1	-0.695469	0.510393	0.4706	1.4118
C17H24O9	0.8957	0.29335	0.5294	1.4118
C17H24O9N2	0.943256	0.215491	0.5294	1.4118
C17H24O9S1	0.841101	0.363816	0.5294	1.4118
C17H25O10N1	-0.308059	0.800641	0.5882	1.4706
C17H25O11N1	-0.576033	0.6092	0.6471	1.4706
C17H25O4N1	-0.987557	0.100533	0.2353	1.4706
C17H25O5N1	0.927459	0.243976	0.2941	1.4706
C17H25O6N1	0.997506	0.0449727	0.3529	1.4706
C17H25O6N1S1	-0.992802	0.0764274	0.3529	1.4706
C17H25O7N1	0.929857	0.23986	0.4118	1.4706
C17H25O7N1S1	-0.655656	0.544784	0.4118	1.4706
C17H25O8N1	0.946806	0.20858	0.4706	1.4706
C17H25O8N1S1	-0.903699	0.281682	0.4706	1.4706
C17H25O9N1	0.724418	0.484217	0.5294	1.4706
C17H25O9N1S1	-0.915358	0.263815	0.5294	1.4706
[truncated: 2,833 more rows]

## Sheet: Chloroplast
MolForm	r	p	O.C	H.C
C10H10O1	0.210498	0.864983	0.1	1
C10H10O1N2	-0.986402	0.105106	0.1	1
C10H10O2	0.74951	0.460579	0.2	1
C10H10O2N2	-0.154573	0.9012	0.2	1
C10H10O2S1	0.445597	0.705983	0.2	1
C10H10O3	0.642117	0.556113	0.3	1
C10H10O3N2	-0.973093	0.148016	0.3	1
C10H10O3S1	0.763015	0.447436	0.3	1
C10H10O4	0.0446111	0.97159	0.4	1
C10H10O4N2	0.997691	0.043269	0.4	1
C10H10O4N2S1	0.952207	0.197617	0.4	1
C10H10O4S1	-0.938985	0.223535	0.4	1
C10H10O5N2	0.36167	0.764413	0.5	1
C10H10O5S1	-0.480907	0.680615	0.5	1
C10H10O6	0.684921	0.519674	0.6	1
C10H10O6N2	0.819403	0.388611	0.6	1
C10H10O6S1	-0.0287993	0.981663	0.6	1
C10H10O7	0.910463	0.27145	0.7	1
C10H10O7S1	-0.347318	0.774185	0.7	1
C10H11O2N1	0.316302	0.795118	0.2	1.1
C10H11O3N1	-0.999164	0.0260296	0.3	1.1
C10H11O3N1S1	0.769544	0.440967	0.3	1.1
C10H11O4N1	0.996686	0.0518449	0.4	1.1
C10H11O4N1S1	-0.852592	0.350059	0.4	1.1
C10H11O5N1	0.983285	0.11656	0.5	1.1
C10H11O5N1S1	0.96272	0.174378	0.5	1.1
C10H11O6N1	0.415825	0.726986	0.6	1.1
C10H11O7N1	0.847395	0.356339	0.7	1.1
C10H12O1	0.491975	0.67255	0.1	1.2
C10H12O2	-0.471092	0.68772	0.2	1.2
C10H12O2N2	0.56963	0.614173	0.2	1.2
C10H12O2S1	-0.422955	0.721986	0.2	1.2
C10H12O3N2	0.914158	0.265706	0.3	1.2
C10H12O3S1	0.342441	0.777493	0.3	1.2
C10H12O4	0.99986	0.0106348	0.4	1.2
C10H12O4N2	0.868297	0.33043	0.4	1.2
C10H12O4S1	-0.151018	0.903489	0.4	1.2
C10H12O5	0.918659	0.258546	0.5	1.2
C10H12O5N2	0.989029	0.0943858	0.5	1.2
C10H12O5N2S1	0.834562	0.371441	0.5	1.2
C10H12O5S1	0.00447539	0.997151	0.5	1.2
C10H12O6	0.666421	0.535651	0.6	1.2
C10H12O6N2	0.849612	0.353672	0.6	1.2
C10H12O6S1	-0.201111	0.87109	0.6	1.2
C10H12O7	0.969326	0.158088	0.7	1.2
C10H12O7S1	0.978179	0.133238	0.7	1.2
C10H13O1N1	0.0493874	0.968546	0.1	1.3
C10H13O2N1	0.684552	0.519996	0.2	1.3
C10H13O3N1	-0.512807	0.657211	0.3	1.3
C10H13O4N1	-0.445889	0.705775	0.4	1.3
C10H13O4N1S1	-0.230508	0.851922	0.4	1.3
C10H13O5N1	0.659196	0.541793	0.5	1.3
C10H13O5N1S1	0.712231	0.49537	0.5	1.3
C10H13O6N1	0.405496	0.734197	0.6	1.3
C10H13O6N1S1	0.244265	0.842907	0.6	1.3
C10H13O7N1	0.973308	0.147419	0.7	1.3
C10H14O1	0.574296	0.610551	0.1	1.4
C10H14O2	0.514778	0.655748	0.2	1.4
C10H14O2N2	0.822482	0.385177	0.2	1.4
C10H14O3	0.756365	0.453947	0.3	1.4
C10H14O3N2	0.94933	0.203526	0.3	1.4
C10H14O3S1	-0.208674	0.866171	0.3	1.4
C10H14O4	-0.465648	0.691643	0.4	1.4
C10H14O4N2	0.613631	0.579416	0.4	1.4
C10H14O4S1	-0.0656225	0.958193	0.4	1.4
C10H14O5	-0.918634	0.258587	0.5	1.4
C10H14O5N2	0.982304	0.119942	0.5	1.4
C10H14O5S1	-0.409864	0.731152	0.5	1.4
C10H14O6	0.654473	0.545781	0.6	1.4
C10H14O6S1	-0.155706	0.90047	0.6	1.4
C10H14O7	-0.982672	0.118686	0.7	1.4
C10H14O7S1	0.97084	0.154117	0.7	1.4
C10H15O1N1	0.205492	0.868241	0.1	1.5
C10H15O2N1	1	0.000233	0.2	1.5
C10H15O3N1	0.531195	0.643486	0.3	1.5
C10H15O4N1	0.176286	0.887183	0.4	1.5
C10H15O4N1S1	0.413732	0.72845	0.4	1.5
C10H15O5N1	0.578789	0.607051	0.5	1.5
C10H15O5N1S1	0.942675	0.216602	0.5	1.5
C10H15O6N1	0.985306	0.10927	0.6	1.5
C10H15O7N1	0.999241	0.0248072	0.7	1.5
C10H15O8N1	0.520432	0.651542	0.8	1.5
C10H16O1	0.995828	0.0581712	0.1	1.6
C10H16O2	-0.468924	0.689284	0.2	1.6
C10H16O3	0.676125	0.527316	0.3	1.6
C10H16O3S1	-0.160269	0.897528	0.3	1.6
C10H16O4N2	-0.97266	0.149206	0.4	1.6
C10H16O4S1	0.528186	0.645745	0.4	1.6
C10H16O5	0.465614	0.691667	0.5	1.6
C10H16O5N2	0.612411	0.580399	0.5	1.6
C10H16O5S1	0.308825	0.800128	0.5	1.6
C10H16O6	0.595691	0.593756	0.6	1.6
C10H16O6S1	0.727547	0.481321	0.6	1.6
C10H16O7	0.996645	0.052163	0.7	1.6
C10H16O7S1	0.982245	0.120142	0.7	1.6
C10H17O10N1S1	0.980874	0.124709	1	1.7
C10H17O3N1	0.897195	0.291202	0.3	1.7
C10H17O4N1	0.934677	0.231378	0.4	1.7
C10H17O5N1	0.800338	0.409307	0.5	1.7
C10H17O7N1	0.515883	0.654927	0.7	1.7
C10H17O7N1S1	0.996013	0.05687	0.7	1.7
C10H17O8N1S1	0.93997	0.221706	0.8	1.7
C10H18O2	-0.462493	0.69391	0.2	1.8
C10H18O3	0.660974	0.540287	0.3	1.8
C10H18O3S1	-0.784508	0.425831	0.3	1.8
C10H18O4	-0.979333	0.129654	0.4	1.8
C10H18O4S1	-0.20728	0.867078	0.4	1.8
C10H18O5S1	0.504696	0.66321	0.5	1.8
C10H18O6	0.850894	0.352122	0.6	1.8
C10H18O6S1	0.847133	0.356653	0.6	1.8
C10H18O7	-0.0499636	0.968179	0.7	1.8
C10H18O7S1	0.999985	0.00347452	0.7	1.8
C10H20O4	-0.833239	0.372967	0.4	2
C10H20O4S1	-0.0715947	0.954382	0.4	2
C10H20O6S1	0.881152	0.313537	0.6	2
C10H20O9S1	0.901872	0.284386	0.9	2
C10H6O3	0.822742	0.384886	0.3	0.6
C10H6O4	0.719722	0.488538	0.4	0.6
C10H6O4S1	0.89561	0.293479	0.4	0.6
C10H6O5	-0.969714	0.157078	0.5	0.6
C10H6O5N2	0.925413	0.247436	0.5	0.6
C10H6O6	0.66868	0.533719	0.6	0.6
C10H6O6N2	-0.880843	0.313953	0.6	0.6
C10H6O7	-0.432388	0.715342	0.7	0.6
C10H7O2N1	-0.628217	0.56757	0.2	0.7
C10H7O3N1	0.948699	0.204801	0.3	0.7
C10H7O3N1S1	0.930569	0.238625	0.3	0.7
C10H7O4N1	0.876495	0.319751	0.4	0.7
C10H7O4N1S1	-0.991148	0.0847667	0.4	0.7
C10H7O5N1	0.241624	0.84464	0.5	0.7
C10H7O5N1S1	-0.0332018	0.978859	0.5	0.7
C10H7O6N1	0.141747	0.909456	0.6	0.7
C10H8O1	0.403791	0.735385	0.1	0.8
C10H8O2	0.284507	0.81634	0.2	0.8
C10H8O2N2	0.869276	0.329171	0.2	0.8
C10H8O2S1	-0.386572	0.747318	0.2	0.8
C10H8O3	0.676286	0.527176	0.3	0.8
C10H8O3N2	0.41917	0.724642	0.3	0.8
C10H8O3S1	0.206144	0.867817	0.3	0.8
C10H8O4	0.999922	0.00795661	0.4	0.8
C10H8O4N2	-0.401795	0.736773	0.4	0.8
C10H8O4N2S1	0.59653	0.593091	0.4	0.8
C10H8O4S1	-0.988629	0.0960978	0.4	0.8
C10H8O5	-0.978535	0.132142	0.5	0.8
C10H8O5N2	0.933394	0.233665	0.5	0.8
C10H8O5S1	-0.202438	0.870227	0.5	0.8
C10H8O6	0.960474	0.179589	0.6	0.8
C10H8O6S1	0.386842	0.747132	0.6	0.8
C10H8O7	0.835535	0.370316	0.7	0.8
C10H9O1N1	0.973969	0.145576	0.1	0.9
C10H9O2N1	0.112358	0.928319	0.2	0.9
C10H9O2N1S1	-0.0746925	0.952405	0.2	0.9
C10H9O3N1	0.41472	0.727759	0.3	0.9
C10H9O3N1S1	-0.964501	0.170137	0.3	0.9
C10H9O4N1	0.988436	0.0969104	0.4	0.9
C10H9O4N1S1	0.815406	0.393027	0.4	0.9
C10H9O5N1	1	0.000466	0.5	0.9
C10H9O5N1S1	0.153641	0.9018	0.5	0.9
C10H9O6N1	0.996701	0.0517268	0.6	0.9
C10H9O7N1	0.990925	0.0858298	0.7	0.9
C11H10O1	0.924936	0.248236	0.0909	0.9091
C11H10O2	-0.979879	0.127925	0.1818	0.9091
C11H10O2N2	0.930424	0.238877	0.1818	0.9091
C11H10O2S1	0.155671	0.900492	0.1818	0.9091
C11H10O3	0.999996	0.00172352	0.2727	0.9091
C11H10O3N2	0.865856	0.333549	0.2727	0.9091
C11H10O3S1	0.389701	0.745157	0.2727	0.9091
C11H10O4	0.684536	0.52001	0.3636	0.9091
C11H10O4N2	0.715252	0.492624	0.3636	0.9091
C11H10O4N2S1	0.0755477	0.951859	0.3636	0.9091
C11H10O4S1	0.0540531	0.965572	0.3636	0.9091
C11H10O5	0.445042	0.706377	0.4545	0.9091
C11H10O5N2	0.955051	0.1916	0.4545	0.9091
C11H10O5N2S1	0.349532	0.772681	0.4545	0.9091
C11H10O5S1	0.160112	0.897629	0.4545	0.9091
C11H10O6	0.664746	0.537079	0.5455	0.9091
C11H10O6N2	0.716626	0.491371	0.5455	0.9091
C11H10O6S1	-0.449542	0.703175	0.5455	0.9091
C11H10O7	0.902125	0.284013	0.6364	0.9091
C11H10O7S1	0.196847	0.873859	0.6364	0.9091
C11H10O8	0.879325	0.315989	0.7273	0.9091
C11H11O2N1	0.518768	0.652781	0.1818	1
C11H11O3N1	0.313525	0.79698	0.2727	1
C11H11O3N1S1	-0.986781	0.103629	0.2727	1
C11H11O4N1	0.96518	0.168492	0.3636	1
C11H11O4N1S1	-0.664463	0.537321	0.3636	1
C11H11O5N1	0.121678	0.922345	0.4545	1
C11H11O5N1S1	-0.99699	0.0494065	0.4545	1
C11H11O6N1	-0.941044	0.219692	0.5455	1
C11H11O6N1S1	-0.824133	0.383326	0.5455	1
C11H11O7N1	0.94729	0.20762	0.6364	1
C11H11O8N1	-0.12432	0.92065	0.7273	1
C11H12O1	0.629595	0.566442	0.0909	1.0909
C11H12O2	0.832771	0.373506	0.1818	1.0909
C11H12O2N2	-0.97437	0.144444	0.1818	1.0909
C11H12O2S1	-0.130956	0.916391	0.1818	1.0909
C11H12O3	-0.98778	0.0996259	0.2727	1.0909
C11H12O3N2	0.629683	0.56637	0.2727	1.0909
C11H12O3S1	-0.259093	0.833153	0.2727	1.0909
C11H12O4	0.573936	0.610831	0.3636	1.0909
C11H12O4N2	0.649148	0.550251	0.3636	1.0909
C11H12O4N2S1	-0.449958	0.702878	0.3636	1.0909
C11H12O4S1	0.0471372	0.96998	0.3636	1.0909
C11H12O5	0.885698	0.307361	0.4545	1.0909
C11H12O5N2	0.99211	0.080023	0.4545	1.0909
C11H12O5S1	0.00789256	0.994975	0.4545	1.0909
C11H12O6	0.740701	0.468987	0.5455	1.0909
C11H12O6N2	0.89426	0.295405	0.5455	1.0909
C11H12O6S1	-0.253925	0.836557	0.5455	1.0909
C11H12O7	0.619967	0.574292	0.6364	1.0909
C11H12O7S1	0.0510923	0.967459	0.6364	1.0909
C11H12O8	0.999414	0.0217903	0.7273	1.0909
C11H13O1N1	-0.562328	0.619811	0.0909	1.1818
C11H13O2N1	0.391829	0.743685	0.1818	1.1818
C11H13O3N1	0.690421	0.514851	0.2727	1.1818
C11H13O4N1	0.561259	0.620634	0.3636	1.1818
C11H13O4N1S1	-0.988477	0.0967367	0.3636	1.1818
C11H13O5N1	0.796178	0.413704	0.4545	1.1818
C11H13O5N1S1	0.04295	0.972649	0.4545	1.1818
C11H13O6N1	0.963822	0.171765	0.5455	1.1818
C11H13O6N1S1	-0.708581	0.498672	0.5455	1.1818
C11H13O7N1	0.862718	0.337521	0.6364	1.1818
C11H13O7N1S1	0.918848	0.258242	0.6364	1.1818
C11H13O8N1	0.994008	0.0697252	0.7273	1.1818
C11H14O1	0.69261	0.512921	0.0909	1.2727
C11H14O2	0.621446	0.573091	0.1818	1.2727
C11H14O2N2	0.858268	0.343082	0.1818	1.2727
C11H14O2S1	0.889476	0.302139	0.1818	1.2727
C11H14O3N2	0.433406	0.714623	0.2727	1.2727
C11H14O3S1	0.0509897	0.967525	0.2727	1.2727
C11H14O4	0.705314	0.501612	0.3636	1.2727
C11H14O4N2	0.518941	0.652653	0.3636	1.2727
C11H14O4N2S1	-0.87281	0.324591	0.3636	1.2727
C11H14O4S1	-0.661607	0.53975	0.3636	1.2727
C11H14O5	0.314191	0.796534	0.4545	1.2727
C11H14O5N2	0.655509	0.544909	0.4545	1.2727
C11H14O5N2S1	0.0791412	0.949564	0.4545	1.2727
C11H14O5S1	-0.105967	0.932412	0.4545	1.2727
C11H14O6	0.476163	0.684054	0.5455	1.2727
C11H14O6N2	0.968347	0.160605	0.5455	1.2727
C11H14O6S1	0.989586	0.0919559	0.5455	1.2727
C11H14O7	0.797614	0.41219	0.6364	1.2727
C11H14O7S1	0.969599	0.157378	0.6364	1.2727
C11H14O8	0.958463	0.184131	0.7273	1.2727
C11H15O1N1	0.999921	0.00801372	0.0909	1.3636
C11H15O2N1	0.629668	0.566382	0.1818	1.3636
C11H15O3N1	0.573991	0.610789	0.2727	1.3636
C11H15O4N1	0.536641	0.639386	0.3636	1.3636
C11H15O4N1S1	-0.99874	0.031963	0.3636	1.3636
C11H15O5N1	0.355873	0.768367	0.4545	1.3636
C11H15O5N1S1	-0.47534	0.68465	0.4545	1.3636
C11H15O6N1	0.498855	0.667508	0.5455	1.3636
C11H15O6N1S1	-0.826238	0.380954	0.5455	1.3636
C11H15O7N1	0.750105	0.460005	0.6364	1.3636
C11H15O7P1	-0.510365	0.659021	0.6364	1.3636
C11H16O1	0.963314	0.172974	0.0909	1.4545
C11H16O2	0.139026	0.911205	0.1818	1.4545
C11H16O2N2	0.673648	0.529452	0.1818	1.4545
C11H16O3	-0.514916	0.655647	0.2727	1.4545
C11H16O3N2	-0.0536037	0.965858	0.2727	1.4545
C11H16O3S1	-0.193722	0.875888	0.2727	1.4545
C11H16O4	0.680826	0.523242	0.3636	1.4545
C11H16O4N2	0.786334	0.423953	0.3636	1.4545
C11H16O4S1	0.941496	0.218842	0.3636	1.4545
C11H16O5	0.113926	0.927315	0.4545	1.4545
C11H16O5N2	-0.287223	0.814536	0.4545	1.4545
C11H16O5S1	-0.810238	0.398676	0.4545	1.4545
C11H16O5S2	-0.967761	0.162091	0.4545	1.4545
C11H16O6	-0.467861	0.690049	0.5455	1.4545
C11H16O6N2	0.897927	0.290146	0.5455	1.4545
C11H16O6S1	0.999967	0.00521085	0.5455	1.4545
C11H16O7	0.582359	0.604259	0.6364	1.4545
C11H16O7S1	0.970173	0.155877	0.6364	1.4545
C11H16O8	0.957644	0.18595	0.7273	1.4545
C11H16O8S1	0.915317	0.263881	0.7273	1.4545
C11H17O2N1	0.783989	0.426364	0.1818	1.5455
C11H17O3N1	0.628263	0.567533	0.2727	1.5455
C11H17O4N1	-0.949645	0.202887	0.3636	1.5455
C11H17O5N1	0.214386	0.86245	0.4545	1.5455
C11H17O5N1S1	0.7484	0.461645	0.4545	1.5455
C11H17O6N1	0.951848	0.198364	0.5455	1.5455
C11H17O7N1	0.952339	0.197341	0.6364	1.5455
C11H18O1	0.132675	0.915287	0.0909	1.6364
C11H18O2	-0.481241	0.680372	0.1818	1.6364
C11H18O3	-0.498228	0.667968	0.2727	1.6364
C11H18O3N2	0.325436	0.788978	0.2727	1.6364
C11H18O4	-0.97008	0.156122	0.3636	1.6364
C11H18O4N2	0.687207	0.517673	0.3636	1.6364
C11H18O4S1	-0.603281	0.587719	0.3636	1.6364
C11H18O5	0.717609	0.490473	0.4545	1.6364
C11H18O5S1	-0.637965	0.559552	0.4545	1.6364
C11H18O6	0.239476	0.846049	0.5455	1.6364
C11H18O6S1	0.629975	0.56613	0.5455	1.6364
C11H18O7	0.547433	0.63121	0.6364	1.6364
C11H18O7S1	0.955944	0.189673	0.6364	1.6364
C11H18O8	0.824794	0.382582	0.7273	1.6364
C11H19O3N1	0.829251	0.377535	0.2727	1.7273
C11H19O4N1	-0.975686	0.140673	0.3636	1.7273
C11H19O5N1	0.240679	0.84526	0.4545	1.7273
C11H19O6N1	0.728334	0.48059	0.5455	1.7273
C11H20O2	0.858298	0.343044	0.1818	1.8182
C11H20O4	0.684423	0.520108	0.3636	1.8182
C11H20O4S1	0.194595	0.875321	0.3636	1.8182
C11H20O5S1	0.357338	0.767369	0.4545	1.8182
C11H20O6	0.157537	0.899289	0.5455	1.8182
C11H20O6S1	0.51533	0.655338	0.5455	1.8182
C11H20O7	0.502071	0.665144	0.6364	1.8182
C11H20O7S1	0.999391	0.0222272	0.6364	1.8182
C11H22O4	0.986703	0.103932	0.3636	2
C11H6O4	0.85689	0.344787	0.3636	0.5455
C11H6O5	0.58051	0.605706	0.4545	0.5455
C11H6O6	0.319288	0.793112	0.5455	0.5455
C11H6O6S1	0.320333	0.792411	0.5455	0.5455
C11H6O7	0.0460551	0.97067	0.6364	0.5455
C11H7O4N1	0.897512	0.290745	0.3636	0.6364
C11H7O5N1	0.207443	0.866971	0.4545	0.6364
C11H7O6N1	-0.142804	0.908776	0.5455	0.6364
C11H7O7N1	0.840942	0.364003	0.6364	0.6364
C11H8O2	0.838861	0.366444	0.1818	0.7273
C11H8O2N2	-0.317127	0.794563	0.1818	0.7273
C11H8O3	0.541499	0.635714	0.2727	0.7273
C11H8O3N2	-0.295432	0.809073	0.2727	0.7273
C11H8O3S1	0.987866	0.0992733	0.2727	0.7273
C11H8O4	0.407935	0.732498	0.3636	0.7273
C11H8O4N2	0.952778	0.196423	0.3636	0.7273
C11H8O4S1	0.964749	0.169537	0.3636	0.7273
C11H8O5	-0.94499	0.212142	0.4545	0.7273
C11H8O5N2	0.615068	0.578257	0.4545	0.7273
C11H8O5S1	0.902824	0.28298	0.4545	0.7273
C11H8O6	0.76756	0.442941	0.5455	0.7273
C11H8O6N2	0.818294	0.389841	0.5455	0.7273
C11H8O6S1	0.610634	0.58183	0.5455	0.7273
C11H8O7	0.514368	0.656053	0.6364	0.7273
C11H9O2N1	0.888733	0.303173	0.1818	0.8182
C11H9O3N1	0.467334	0.690429	0.2727	0.8182
C11H9O3N1S1	0.0589506	0.962449	0.2727	0.8182
C11H9O4N1	0.343733	0.776617	0.3636	0.8182
C11H9O4N1S1	0.906792	0.277047	0.3636	0.8182
C11H9O5N1	0.192015	0.876996	0.4545	0.8182
C11H9O5N1S1	-0.82622	0.380974	0.4545	0.8182
C11H9O6N1	0.270509	0.825616	0.5455	0.8182
C11H9O7N1	0.813634	0.394972	0.6364	0.8182
C12H10O2	-0.999956	0.00595809	0.1667	0.8333
C12H10O2N2	0.610589	0.581866	0.1667	0.8333
C12H10O3	0.0983424	0.937292	0.25	0.8333
C12H10O3N2	0.999031	0.0280219	0.25	0.8333
C12H10O3S1	0.11039	0.92958	0.25	0.8333
C12H10O4	-0.469163	0.689112	0.3333	0.8333
C12H10O4N2	0.644594	0.554053	0.3333	0.8333
C12H10O4N2S1	-0.0878736	0.943986	0.3333	0.8333
C12H10O4S1	-0.478944	0.68204	0.3333	0.8333
C12H10O5	0.190938	0.877694	0.4167	0.8333
C12H10O5N2	0.355588	0.768561	0.4167	0.8333
C12H10O5N2S1	0.615141	0.578199	0.4167	0.8333
C12H10O5S1	0.0729851	0.953495	0.4167	0.8333
C12H10O6	0.99933	0.0233045	0.5	0.8333
C12H10O6N2	0.11128	0.92901	0.5	0.8333
C12H10O6S1	-0.910454	0.271465	0.5	0.8333
C12H10O7	0.547279	0.631327	0.5833	0.8333
C12H10O7N2	0.272783	0.824112	0.5833	0.8333
C12H10O7S1	-0.355476	0.768637	0.5833	0.8333
C12H10O8	0.990169	0.0893407	0.6667	0.8333
C12H11O2N1	0.932901	0.234538	0.1667	0.9167
C12H11O3N1	0.716575	0.491418	0.25	0.9167
C12H11O3N1S1	-0.808932	0.400092	0.25	0.9167
C12H11O4N1	0.344007	0.776431	0.3333	0.9167
C12H11O4N1S1	-0.283476	0.817025	0.3333	0.9167
C12H11O5N1	0.186179	0.880779	0.4167	0.9167
C12H11O5N1S1	0.790341	0.419806	0.4167	0.9167
C12H11O6N1	0.753561	0.456669	0.5	0.9167
C12H11O6N1S1	-0.983333	0.116394	0.5	0.9167
C12H11O7N1	0.991816	0.0815025	0.5833	0.9167
C12H11O8N1	0.940596	0.220534	0.6667	0.9167
C12H12O1	0.90049	0.286417	0.0833	1
C12H12O2	0.543889	0.633902	0.1667	1
C12H12O2N2	-0.779698	0.430745	0.1667	1
C12H12O3	0.447998	0.704274	0.25	1
C12H12O3N2	0.359252	0.766064	0.25	1
C12H12O3S1	0.996797	0.0509674	0.25	1
C12H12O3S2	-0.706093	0.500912	0.25	1
C12H12O4	0.778145	0.432322	0.3333	1
C12H12O4N2	0.46865	0.689481	0.3333	1
C12H12O4N2S1	-0.705823	0.501155	0.3333	1
C12H12O4S1	0.422585	0.722245	0.3333	1
C12H12O5	0.12133	0.922568	0.4167	1
C12H12O5N2	0.592814	0.596034	0.4167	1
C12H12O5N2S1	0.648507	0.550787	0.4167	1
C12H12O5S1	0.899077	0.288478	0.4167	1
C12H12O6	0.395464	0.741167	0.5	1
C12H12O6N2	0.791043	0.419076	0.5	1
C12H12O6S1	0.0951397	0.93934	0.5	1
C12H12O7	0.686962	0.517888	0.5833	1
C12H12O7S1	0.225592	0.855137	0.5833	1
C12H12O8	0.955497	0.19064	0.6667	1
C12H12O8S1	0.609509	0.582733	0.6667	1
C12H13O2N1	-0.91769	0.260104	0.1667	1.0833
C12H13O3N1	-0.996349	0.0544135	0.25	1.0833
C12H13O4N1	0.459373	0.696148	0.3333	1.0833
C12H13O4N1S1	-0.985811	0.107371	0.3333	1.0833
C12H13O5N1	0.300159	0.80592	0.4167	1.0833
C12H13O5N1S1	-0.994207	0.0685595	0.4167	1.0833
C12H13O6N1	0.369505	0.759055	0.5	1.0833
C12H13O6N1S1	-0.583496	0.603369	0.5	1.0833
C12H13O7N1	0.645842	0.553013	0.5833	1.0833
C12H13O7N1S1	-0.995634	0.0595074	0.5833	1.0833
C12H13O8N1	0.949717	0.202741	0.6667	1.0833
C12H14O1	-0.932585	0.235095	0.0833	1.1667
C12H14O2	-0.546876	0.631634	0.1667	1.1667
C12H14O2N2	0.586648	0.600894	0.1667	1.1667
C12H14O3	0.793426	0.416591	0.25	1.1667
C12H14O3N2	0.989501	0.0923299	0.25	1.1667
C12H14O3S1	-0.0992806	0.936692	0.25	1.1667
C12H14O4N2	0.533007	0.642124	0.3333	1.1667
C12H14O4N2S1	-0.997222	0.0474607	0.3333	1.1667
C12H14O4S1	-0.0383586	0.975574	0.3333	1.1667
C12H14O5	0.673916	0.529222	0.4167	1.1667
C12H14O5N2	0.594083	0.59503	0.4167	1.1667
C12H14O5S1	0.994995	0.0637183	0.4167	1.1667
C12H14O6N2	0.914287	0.265503	0.5	1.1667
C12H14O6N2S1	-0.709372	0.497957	0.5	1.1667
C12H14O6S1	0.111654	0.928771	0.5	1.1667
C12H14O7	0.764044	0.446422	0.5833	1.1667
C12H14O7S1	0.351333	0.771457	0.5833	1.1667
C12H14O8	0.907203	0.276426	0.6667	1.1667
C12H14O8S1	0.431544	0.715938	0.6667	1.1667
C12H14O9	0.999978	0.00419126	0.75	1.1667
C12H15O1N1	0.550854	0.628604	0.0833	1.25
C12H15O2N1	0.776486	0.434001	0.1667	1.25
C12H15O3N1	-0.416656	0.726404	0.25	1.25
C12H15O4N1	0.332349	0.784318	0.3333	1.25
C12H15O4N1S1	-0.923754	0.250209	0.3333	1.25
C12H15O5N1	0.440399	0.709674	0.4167	1.25
C12H15O5N1S1	-0.965569	0.167542	0.4167	1.25
C12H15O6N1	0.117021	0.925331	0.5	1.25
C12H15O6N1S1	0.97797	0.133876	0.5	1.25
C12H15O7N1	0.760935	0.449482	0.5833	1.25
C12H15O7N1S1	0.731395	0.477739	0.5833	1.25
C12H15O8N1	0.972408	0.149895	0.6667	1.25
C12H16O1	0.642665	0.555658	0.0833	1.3333
C12H16O2	0.576627	0.608738	0.1667	1.3333
C12H16O2N2	-0.205877	0.867991	0.1667	1.3333
C12H16O2S1	-0.981495	0.122662	0.1667	1.3333
C12H16O3	0.031067	0.980219	0.25	1.3333
C12H16O3S1	-0.00241412	0.998463	0.25	1.3333
C12H16O4	-0.521437	0.650792	0.3333	1.3333
C12H16O4N2	0.489038	0.674696	0.3333	1.3333
C12H16O4S1	-0.215034	0.862027	0.3333	1.3333
C12H16O5	0.181129	0.88405	0.4167	1.3333
C12H16O5N2	0.382997	0.749784	0.4167	1.3333
C12H16O5S1	-0.0808876	0.948449	0.4167	1.3333
C12H16O6	0.21912	0.859363	0.5	1.3333
C12H16O6N2	0.51482	0.655717	0.5	1.3333
C12H16O6N2S1	0.952361	0.197295	0.5	1.3333
C12H16O6S1	-0.00951502	0.993942	0.5	1.3333
C12H16O7	0.468673	0.689464	0.5833	1.3333
C12H16O7S1	0.182843	0.88294	0.5833	1.3333
C12H16O8	0.785931	0.424369	0.6667	1.3333
C12H16O8S1	0.849829	0.35341	0.6667	1.3333
C12H16O9	0.994273	0.0681686	0.75	1.3333
C12H16O9S1	0.91545	0.263671	0.75	1.3333
C12H17O2N1	-0.614418	0.578782	0.1667	1.4167
C12H17O3N1	0.997852	0.0417301	0.25	1.4167
C12H17O4N1	0.999816	0.0122195	0.3333	1.4167
C12H17O4N1S1	-0.865599	0.333875	0.3333	1.4167
C12H17O5N1	0.446273	0.705502	0.4167	1.4167
C12H17O5N1S1	-0.840424	0.364612	0.4167	1.4167
C12H17O5N3	-0.913931	0.266062	0.4167	1.4167
C12H17O6N1	0.320499	0.792299	0.5	1.4167
C12H17O6N1S1	0.987556	0.100539	0.5	1.4167
C12H17O7N1	0.779317	0.431133	0.5833	1.4167
C12H17O8N1	0.977501	0.1353	0.6667	1.4167
C12H18O1	-0.129329	0.917435	0.0833	1.5
C12H18O2	0.99991	0.00853	0.1667	1.5
C12H18O2N2	0.703644	0.50311	0.1667	1.5
C12H18O3	0.444331	0.706883	0.25	1.5
C12H18O3N2	0.313511	0.79699	0.25	1.5
C12H18O3S1	-0.199223	0.872316	0.25	1.5
C12H18O4	0.99975	0.0142234	0.3333	1.5
C12H18O4N2	0.611624	0.581033	0.3333	1.5
C12H18O4S1	0.980409	0.126221	0.3333	1.5
C12H18O5	0.675305	0.528024	0.4167	1.5
C12H18O5N2	0.217017	0.860734	0.4167	1.5
C12H18O5S1	-0.0665193	0.957621	0.4167	1.5
C12H18O6	-0.541393	0.635794	0.5	1.5
C12H18O6N2	0.698867	0.507376	0.5	1.5
C12H18O6S1	-0.00824087	0.994754	0.5	1.5
C12H18O7	0.462978	0.693562	0.5833	1.5
C12H18O7S1	0.873172	0.324118	0.5833	1.5
C12H18O8	0.6128	0.580086	0.6667	1.5
C12H18O8S1	0.605338	0.586076	0.6667	1.5
C12H18O9	0.998861	0.0303829	0.75	1.5
C12H18O9S1	0.954913	0.191897	0.75	1.5
C12H19O3N1	0.706179	0.500835	0.25	1.5833
C12H19O4N1	-0.0489837	0.968804	0.3333	1.5833
C12H19O5N1	-0.959975	0.180727	0.4167	1.5833
C12H19O5N1S1	0.990048	0.0898879	0.4167	1.5833
C12H19O5N3	0.997395	0.0459593	0.4167	1.5833
C12H19O6N1	0.243018	0.843725	0.5	1.5833
C12H19O6N1S1	0.999778	0.0134103	0.5	1.5833
C12H19O7N1	0.501689	0.665424	0.5833	1.5833
C12H19O8N1	0.999167	0.0259834	0.6667	1.5833
C12H20O1	0.870887	0.32709	0.0833	1.6667
C12H20O4N2	0.721192	0.487189	0.3333	1.6667
C12H20O4S1	-0.216201	0.861267	0.3333	1.6667
C12H20O5N2	-0.697333	0.50874	0.4167	1.6667
C12H20O5S1	-0.191434	0.877372	0.4167	1.6667
C12H20O6	0.146378	0.906477	0.5	1.6667
C12H20O6N2	0.602622	0.588246	0.5	1.6667
C12H20O6S1	0.102253	0.93479	0.5	1.6667
C12H20O7	-0.884917	0.30843	0.5833	1.6667
C12H20O7S1	0.953631	0.194626	0.5833	1.6667
C12H20O8	0.513517	0.656685	0.6667	1.6667
C12H20O8S1	0.239439	0.846073	0.6667	1.6667
C12H20O9S1	0.999953	0.00616457	0.75	1.6667
C12H21O4N1	0.842339	0.362356	0.3333	1.75
C12H21O5N1	-0.392482	0.743233	0.4167	1.75
C12H21O6N1	0.578428	0.607333	0.5	1.75
C12H22O2	-0.347519	0.774048	0.1667	1.8333
C12H22O4	0.999831	0.0116887	0.3333	1.8333
C12H22O4S1	-0.462422	0.693961	0.3333	1.8333
C12H22O5	0.9124	0.268453	0.4167	1.8333
C12H22O5S1	-0.151284	0.903319	0.4167	1.8333
C12H22O6	-0.632206	0.564299	0.5	1.8333
C12H22O6S1	0.0387334	0.975335	0.5	1.8333
C12H22O7	0.606188	0.585396	0.5833	1.8333
C12H22O7S1	0.46256	0.693862	0.5833	1.8333
C12H22O8	0.19623	0.87426	0.6667	1.8333
C12H22O9	-0.606079	0.585483	0.75	1.8333
C12H23O6N1S1	0.678971	0.524852	0.5	1.9167
C12H24O10S1	0.917656	0.260159	0.8333	2
C12H24O6	0.217255	0.860579	0.5	2
C12H26O4S1	-0.25277	0.837317	0.3333	2.1667
C12H27O2N2S2P1	0.87703	0.319043	0.1667	2.25
C12H6O5	0.959928	0.180832	0.4167	0.5
C12H6O5N2	0.979761	0.128299	0.4167	0.5
C12H6O6	0.365752	0.761623	0.5	0.5
C12H7O3N1	-0.900812	0.285945	0.25	0.5833
C12H7O4N1	0.962095	0.175843	0.3333	0.5833
C12H7O5N1	0.999722	0.0150106	0.4167	0.5833
C12H7O6N1	0.824699	0.382689	0.5	0.5833
C12H7O7N1	0.99986	0.0106344	0.5833	0.5833
C12H8O2N2	0.969135	0.15858	0.1667	0.6667
C12H8O3	0.897865	0.290235	0.25	0.6667
C12H8O3N2	0.982712	0.118547	0.25	0.6667
C12H8O4	-0.997991	0.0403636	0.3333	0.6667
C12H8O4N2	0.524408	0.648574	0.3333	0.6667
C12H8O4S1	0.0874049	0.944285	0.3333	0.6667
C12H8O5	-0.940594	0.220539	0.4167	0.6667
C12H8O5N2	0.534115	0.64129	0.4167	0.6667
C12H8O5S1	0.904952	0.279814	0.4167	0.6667
C12H8O6	0.0874171	0.944277	0.5	0.6667
C12H8O6N2	0.138225	0.91172	0.5	0.6667
C12H8O6S1	0.600976	0.589558	0.5	0.6667
C12H8O7	0.388704	0.745846	0.5833	0.6667
C12H8O8	0.462747	0.693728	0.6667	0.6667
C12H9O2N1	-0.124712	0.920399	0.1667	0.75
C12H9O3N1	0.982365	0.119734	0.25	0.75
C12H9O3N1S1	0.687233	0.517651	0.25	0.75
C12H9O4N1	0.636182	0.561026	0.3333	0.75
C12H9O4N1S1	0.991377	0.0836642	0.3333	0.75
C12H9O5N1	0.712985	0.494685	0.4167	0.75
C12H9O5N1S1	-0.624944	0.570244	0.4167	0.75
C12H9O6N1	0.510554	0.658881	0.5	0.75
C12H9O6N1S1	0.932675	0.234936	0.5	0.75
C12H9O7N1	0.82816	0.378776	0.5833	0.75
C12H9O8N1	0.484659	0.677887	0.6667	0.75
C13H10O1	0.859738	0.341254	0.0769	0.7692
C13H10O2N2	-0.175978	0.887383	0.1538	0.7692
C13H10O3	0.884424	0.309103	0.2308	0.7692
C13H10O3N2	0.787566	0.422681	0.2308	0.7692
C13H10O3N2S1	0.612564	0.580276	0.2308	0.7692
C13H10O4	0.999316	0.023544	0.3077	0.7692
C13H10O4N2	0.942595	0.216755	0.3077	0.7692
C13H10O4S1	0.550833	0.628621	0.3077	0.7692
C13H10O5	0.160689	0.897256	0.3846	0.7692
C13H10O5N2	0.618975	0.575096	0.3846	0.7692
C13H10O5N2S1	0.406259	0.733666	0.3846	0.7692
C13H10O5S1	-0.0915491	0.941636	0.3846	0.7692
C13H10O6	0.74204	0.467717	0.4615	0.7692
C13H10O6N2	0.348939	0.773084	0.4615	0.7692
C13H10O6S1	0.717577	0.490502	0.4615	0.7692
C13H10O7	0.500245	0.666487	0.5385	0.7692
C13H10O7N2	0.687723	0.517221	0.5385	0.7692
C13H10O7S1	0.763335	0.447121	0.5385	0.7692
C13H10O8	0.271311	0.825086	0.6154	0.7692
C13H10O8N2	-0.202365	0.870274	0.6154	0.7692
C13H10O9	0.771396	0.439117	0.6923	0.7692
C13H11O2N1	-0.136216	0.913012	0.1538	0.8462
C13H11O3N1	0.885042	0.308259	0.2308	0.8462
C13H11O4N1	-0.274998	0.822646	0.3077	0.8462
C13H11O4N1S1	-0.447623	0.704541	0.3077	0.8462
C13H11O5N1	0.276689	0.821525	0.3846	0.8462
C13H11O5N1S1	0.999634	0.0172179	0.3846	0.8462
C13H11O6N1	0.508137	0.660669	0.4615	0.8462
C13H11O6N1S1	0.980701	0.125276	0.4615	0.8462
C13H11O7N1	0.397848	0.739514	0.5385	0.8462
C13H11O7N1S1	0.999729	0.0148146	0.5385	0.8462
C13H11O8N1	0.776581	0.433905	0.6154	0.8462
C13H12O2N2	0.861581	0.338949	0.1538	0.9231
C13H12O3	-0.544446	0.63348	0.2308	0.9231
C13H12O3N2	0.470606	0.688071	0.2308	0.9231
C13H12O3S1	-0.0508979	0.967583	0.2308	0.9231
C13H12O4	0.645146	0.553593	0.3077	0.9231
C13H12O4N2	0.356669	0.767824	0.3077	0.9231
C13H12O4S1	-0.0166905	0.989374	0.3077	0.9231
C13H12O5	0.999055	0.027682	0.3846	0.9231
C13H12O5N2	0.404923	0.734597	0.3846	0.9231
C13H12O5S1	-0.127946	0.918323	0.3846	0.9231
C13H12O6	0.648333	0.550933	0.4615	0.9231
C13H12O6N2	0.530295	0.644163	0.4615	0.9231
C13H12O6N2S1	0.926363	0.245836	0.4615	0.9231
C13H12O6S1	-0.231358	0.851366	0.4615	0.9231
C13H12O7	0.0664072	0.957693	0.5385	0.9231
C13H12O7N2	0.507506	0.661135	0.5385	0.9231
C13H12O7S1	0.6176	0.57621	0.5385	0.9231
C13H12O8	0.758922	0.451453	0.6154	0.9231
C13H12O8S1	0.983169	0.116965	0.6154	0.9231
C13H12O9	0.996068	0.056475	0.6923	0.9231
C13H12O9S1	-0.0740946	0.952787	0.6923	0.9231
C13H13O2N1	-0.999998	0.00133385	0.1538	1
C13H13O3N1	0.0896802	0.942831	0.2308	1
C13H13O4N1	0.308573	0.800297	0.3077	1
C13H13O4N1S1	0.681356	0.522781	0.3077	1
C13H13O5N1	-0.00726549	0.995375	0.3846	1
C13H13O5N1S1	0.996473	0.0534814	0.3846	1
C13H13O6N1	0.28807	0.813973	0.4615	1
C13H13O6N1S1	-0.862227	0.338138	0.4615	1
C13H13O7N1	0.801355	0.408225	0.5385	1
C13H13O7N1S1	-0.422025	0.722639	0.5385	1
C13H13O8N1	0.999625	0.0174263	0.6154	1
C13H13O9N1	0.0420648	0.973213	0.6923	1
C13H14O1	-0.0642438	0.959073	0.0769	1.0769
C13H14O10	0.991189	0.0845742	0.7692	1.0769
C13H14O2	0.559758	0.621788	0.1538	1.0769
C13H14O2N2	0.995025	0.0635275	0.1538	1.0769
C13H14O3	-0.505652	0.662504	0.2308	1.0769
C13H14O3N2	-0.0401108	0.974458	0.2308	1.0769
C13H14O3S1	-0.0737901	0.952981	0.2308	1.0769
C13H14O4	0.510747	0.658738	0.3077	1.0769
C13H14O4N2	0.385048	0.74837	0.3077	1.0769
C13H14O4N2S1	0.135873	0.913232	0.3077	1.0769
C13H14O4S1	-0.67739	0.526222	0.3077	1.0769
C13H14O5	0.57295	0.611597	0.3846	1.0769
C13H14O5N2	0.429332	0.717498	0.3846	1.0769
C13H14O5N2S1	-0.943019	0.215945	0.3846	1.0769
C13H14O5S1	-0.0824567	0.947447	0.3846	1.0769
C13H14O6	0.260764	0.832051	0.4615	1.0769
C13H14O6N2	-0.9348	0.231157	0.4615	1.0769
C13H14O6N2S1	0.678797	0.525003	0.4615	1.0769
C13H14O6S1	0.998455	0.0353942	0.4615	1.0769
C13H14O7	-0.973988	0.145522	0.5385	1.0769
C13H14O7N2	0.822006	0.38571	0.5385	1.0769
C13H14O7S1	0.30676	0.80151	0.5385	1.0769
C13H14O8	-0.983556	0.115609	0.6154	1.0769
C13H14O8N2	0.350097	0.772297	0.6154	1.0769
C13H14O8S1	0.856255	0.345571	0.6154	1.0769
C13H14O9	0.989396	0.0927913	0.6923	1.0769
C13H14O9S1	0.997039	0.0490051	0.6923	1.0769
C13H15O2N1	-0.591227	0.597288	0.1538	1.1538
C13H15O3N1	-0.998429	0.0356911	0.2308	1.1538
C13H15O4N1	0.999453	0.0210603	0.3077	1.1538
C13H15O4N1S1	-0.161856	0.896504	0.3077	1.1538
C13H15O5N1	0.711888	0.495681	0.3846	1.1538
C13H15O5N1S1	-0.876003	0.320402	0.3846	1.1538
C13H15O6N1	0.268394	0.827014	0.4615	1.1538
C13H15O6N1S1	-0.710838	0.496632	0.4615	1.1538
C13H15O7N1	0.441424	0.708947	0.5385	1.1538
C13H15O7N1S1	0.129149	0.917551	0.5385	1.1538
C13H15O8N1	0.950906	0.200311	0.6154	1.1538
C13H15O8N1S1	0.978056	0.133615	0.6154	1.1538
C13H15O9N1	0.808205	0.400879	0.6923	1.1538
C13H16O1	0.878365	0.317269	0.0769	1.2308
C13H16O1N2	-0.148975	0.904805	0.0769	1.2308
C13H16O2	0.544584	0.633375	0.1538	1.2308
C13H16O2N2	0.417663	0.725699	0.1538	1.2308
C13H16O3	-0.558383	0.622844	0.2308	1.2308
C13H16O3N2	0.726839	0.481978	0.2308	1.2308
C13H16O3S1	0.991067	0.0851575	0.2308	1.2308
C13H16O4	0.467574	0.690257	0.3077	1.2308
C13H16O4N2	0.347681	0.773938	0.3077	1.2308
C13H16O4S1	-0.0506218	0.967759	0.3077	1.2308
C13H16O5	0.99201	0.0805293	0.3846	1.2308
C13H16O5N2	0.502566	0.664779	0.3846	1.2308
C13H16O5S1	-0.0988725	0.936953	0.3846	1.2308
C13H16O6	0.999151	0.0262321	0.4615	1.2308
C13H16O6N2	0.272828	0.824082	0.4615	1.2308
C13H16O6S1	0.0911341	0.941902	0.4615	1.2308
C13H16O7	0.347433	0.774107	0.5385	1.2308
C13H16O7N2S1	0.987209	0.101933	0.5385	1.2308
C13H16O7S1	0.173659	0.888882	0.5385	1.2308
C13H16O8	-0.940054	0.221548	0.6154	1.2308
C13H16O8S1	0.439044	0.710634	0.6154	1.2308
C13H16O9	0.945216	0.211701	0.6923	1.2308
C13H16O9S1	0.359816	0.765679	0.6923	1.2308
C13H17O2N1	0.741119	0.468591	0.1538	1.3077
C13H17O3N1	-0.957995	0.185173	0.2308	1.3077
C13H17O4N1	-0.152793	0.902346	0.3077	1.3077
C13H17O4N1S1	-0.401362	0.737074	0.3077	1.3077
C13H17O5N1	0.0170603	0.989139	0.3846	1.3077
C13H17O5N1S1	-0.735378	0.474009	0.3846	1.3077
C13H17O6N1	0.288873	0.813439	0.4615	1.3077
C13H17O6N1S1	0.180734	0.884306	0.4615	1.3077
C13H17O7N1	0.487588	0.675754	0.5385	1.3077
C13H17O7N1S1	0.761468	0.448958	0.5385	1.3077
C13H17O8N1	0.78052	0.429908	0.6154	1.3077
C13H17O8N1S1	0.370887	0.758108	0.6154	1.3077
C13H17O9N1	0.960172	0.180277	0.6923	1.3077
C13H18O1	-0.828148	0.37879	0.0769	1.3846
C13H18O10	0.9727	0.149098	0.7692	1.3846
C13H18O2	0.562262	0.619862	0.1538	1.3846
C13H18O2N2	-0.787857	0.422381	0.1538	1.3846
C13H18O3	0.326078	0.788546	0.2308	1.3846
C13H18O3N2	0.246901	0.841176	0.2308	1.3846
C13H18O3S1	-0.136703	0.912699	0.2308	1.3846
C13H18O4	-0.56063	0.621118	0.3077	1.3846
C13H18O4N2	0.295152	0.809259	0.3077	1.3846
C13H18O4S1	-0.13451	0.914108	0.3077	1.3846
C13H18O5	0.222608	0.857086	0.3846	1.3846
C13H18O5N2	0.290139	0.812597	0.3846	1.3846
C13H18O5S1	0.999957	0.00593251	0.3846	1.3846
C13H18O6	0.124858	0.920305	0.4615	1.3846
C13H18O6N2	0.455198	0.699137	0.4615	1.3846
C13H18O6S1	0.976772	0.13748	0.4615	1.3846
C13H18O7	0.422023	0.72264	0.5385	1.3846
C13H18O7S1	-0.178046	0.886045	0.5385	1.3846
C13H18O7S2	-0.465858	0.691492	0.5385	1.3846
C13H18O8	0.55115	0.628378	0.6154	1.3846
C13H18O8S1	0.805075	0.40425	0.6154	1.3846
C13H18O9	0.922615	0.252096	0.6923	1.3846
C13H18O9S1	0.879086	0.316308	0.6923	1.3846
C13H19O2N1	0.354975	0.768979	0.1538	1.4615
C13H19O3N1	0.767685	0.442817	0.2308	1.4615
C13H19O4N1	-0.128479	0.917981	0.3077	1.4615
C13H19O5N1	0.0275159	0.982481	0.3846	1.4615
C13H19O5N1S1	0.985147	0.109861	0.3846	1.4615
C13H19O5N3	0.960719	0.179028	0.3846	1.4615
C13H19O6N1	0.161378	0.896812	0.4615	1.4615
C13H19O6N1S1	-0.987022	0.102677	0.4615	1.4615
C13H19O7N1	0.496941	0.668913	0.5385	1.4615
C13H19O7N1S1	-0.969368	0.157978	0.5385	1.4615
C13H19O8N1	0.961136	0.178068	0.6154	1.4615
C13H19O9N1	0.935151	0.230527	0.6923	1.4615
C13H20O1	0.999775	0.0135143	0.0769	1.5385
C13H20O3N2	-0.379487	0.752201	0.2308	1.5385
C13H20O4N2	0.39726	0.739922	0.3077	1.5385
C13H20O4S1	-0.145673	0.90693	0.3077	1.5385
C13H20O5	0.196209	0.874274	0.3846	1.5385
C13H20O5N2	0.336718	0.781366	0.3846	1.5385
C13H20O5S1	-0.243545	0.843379	0.3846	1.5385
C13H20O6	0.210925	0.864705	0.4615	1.5385
C13H20O6N2	0.758977	0.451398	0.4615	1.5385
C13H20O6S1	-0.241943	0.84443	0.4615	1.5385
C13H20O7	0.151287	0.903316	0.5385	1.5385
C13H20O7S1	0.915339	0.263846	0.5385	1.5385
C13H20O8	-0.882199	0.312124	0.6154	1.5385
C13H20O8S1	0.959579	0.181625	0.6154	1.5385
C13H20O9	0.840701	0.364287	0.6923	1.5385
C13H20O9S1	0.893508	0.296474	0.6923	1.5385
C13H21O4N1	0.641914	0.556281	0.3077	1.6154
C13H21O5N1	0.355942	0.76832	0.3846	1.6154
C13H21O5N3	0.00412178	0.997376	0.3846	1.6154
C13H21O6N1	0.246812	0.841234	0.4615	1.6154
C13H21O6N1S1	-0.39639	0.740526	0.4615	1.6154
C13H21O7N1	0.600375	0.590036	0.5385	1.6154
C13H21O8N1	0.469831	0.68863	0.6154	1.6154
C13H22O4	-0.192524	0.876665	0.3077	1.6923
C13H22O4N2	0.431601	0.715898	0.3077	1.6923
C13H22O4S1	-0.339762	0.779307	0.3077	1.6923
C13H22O5N2	0.815586	0.392829	0.3846	1.6923
C13H22O5S1	0.0154797	0.990145	0.3846	1.6923
C13H22O6	0.358145	0.766819	0.4615	1.6923
C13H22O6N2	0.995787	0.0584586	0.4615	1.6923
C13H22O6S1	0.136123	0.913071	0.4615	1.6923
C13H22O7	-0.557251	0.623712	0.5385	1.6923
C13H22O7S1	0.854539	0.347679	0.5385	1.6923
C13H22O8	0.557983	0.623151	0.6154	1.6923
C13H22O8S1	0.971047	0.153566	0.6154	1.6923
C13H22O9S1	0.815156	0.393302	0.6923	1.6923
C13H23O6N1	0.291247	0.81186	0.4615	1.7692
C13H24O4	-0.307097	0.801285	0.3077	1.8462
C13H24O5	-0.96524	0.168346	0.3846	1.8462
C13H24O5S1	-0.119087	0.924006	0.3846	1.8462
C13H24O6	0.700976	0.505496	0.4615	1.8462
C13H24O6S1	0.396805	0.740238	0.4615	1.8462
C13H24O7	0.828429	0.378471	0.5385	1.8462
C13H6O5	0.990794	0.086449	0.3846	0.4615
C13H6O7	-0.502397	0.664903	0.5385	0.4615
C13H7O4N1	0.860275	0.340583	0.3077	0.5385
C13H7O5N1	0.302574	0.804308	0.3846	0.5385
C13H7O6N1	0.927656	0.243641	0.4615	0.5385
C13H8O2	-0.452093	0.701355	0.1538	0.6154
C13H8O3	0.894784	0.294659	0.2308	0.6154
C13H8O4	0.770959	0.439555	0.3077	0.6154
C13H8O4N2	-0.418804	0.724899	0.3077	0.6154
C13H8O4S1	-0.305148	0.802588	0.3077	0.6154
C13H8O5	0.383866	0.749185	0.3846	0.6154
C13H8O5N2	0.381931	0.750518	0.3846	0.6154
C13H8O5S1	0.28093	0.818714	0.3846	0.6154
C13H8O6	0.757846	0.452504	0.4615	0.6154
C13H8O6N2	0.317895	0.794048	0.4615	0.6154
C13H8O6S1	-0.468844	0.689341	0.4615	0.6154
C13H8O7	0.295357	0.809123	0.5385	0.6154
C13H8O8	0.419871	0.72415	0.6154	0.6154
C13H9O2N1	-0.978246	0.133033	0.1538	0.6923
C13H9O3N1	0.60101	0.589531	0.2308	0.6923
C13H9O4N1	0.147601	0.90569	0.3077	0.6923
C13H9O4N1S1	-0.978605	0.131926	0.3077	0.6923
C13H9O5N1	0.200432	0.871531	0.3846	0.6923
C13H9O5N1S1	0.629109	0.56684	0.3846	0.6923
C13H9O6N1	0.449362	0.703303	0.4615	0.6923
C13H9O6N1S1	0.458168	0.697012	0.4615	0.6923
C13H9O7N1	0.946858	0.208476	0.5385	0.6923
C13H9O8N1	0.551961	0.627759	0.6154	0.6923
C14H10O10	0.650956	0.548737	0.7143	0.7143
C14H10O2	-0.151123	0.903422	0.1429	0.7143
C14H10O3	0.985329	0.109185	0.2143	0.7143
C14H10O3N2	-0.565826	0.617115	0.2143	0.7143
C14H10O4	0.9618	0.17653	0.2857	0.7143
C14H10O4N2	0.378957	0.752566	0.2857	0.7143
C14H10O4S1	-0.802438	0.407072	0.2857	0.7143
C14H10O5	0.458569	0.696725	0.3571	0.7143
C14H10O5N2	0.521431	0.650797	0.3571	0.7143
C14H10O5S1	0.291068	0.811979	0.3571	0.7143
C14H10O6	-0.493279	0.671596	0.4286	0.7143
C14H10O6N2	-0.470553	0.688109	0.4286	0.7143
C14H10O6S1	0.503169	0.664334	0.4286	0.7143
C14H10O7	-0.937724	0.225858	0.5	0.7143
C14H10O7N2	0.167531	0.892841	0.5	0.7143
C14H10O7S1	0.531602	0.643181	0.5	0.7143
C14H10O8	-0.0120307	0.992341	0.5714	0.7143
C14H10O8N2	0.405877	0.733932	0.5714	0.7143
C14H10O9	0.147753	0.905592	0.6429	0.7143
C14H11O14P1	0.716853	0.491164	1	0.7857
C14H11O2N1	0.789868	0.420298	0.1429	0.7857
C14H11O3N1	0.900786	0.285983	0.2143	0.7857
C14H11O4N1	-0.879218	0.316132	0.2857	0.7857
C14H11O4N1S1	-0.971874	0.151347	0.2857	0.7857
C14H11O5N1	0.247753	0.840616	0.3571	0.7857
C14H11O5N1S1	0.341056	0.778431	0.3571	0.7857
C14H11O6N1	0.219387	0.859189	0.4286	0.7857
C14H11O6N1S1	0.990511	0.0877703	0.4286	0.7857
C14H11O7N1	0.0494612	0.968499	0.5	0.7857
C14H11O7N1S1	-0.66419	0.537553	0.5	0.7857
C14H11O8N1	-0.199181	0.872343	0.5714	0.7857
C14H11O9N1	0.568102	0.615356	0.6429	0.7857
C14H12O1	-0.259217	0.833071	0.0714	0.8571
C14H12O10	0.699041	0.507221	0.7143	0.8571
C14H12O2	0.0848852	0.945895	0.1429	0.8571
C14H12O2N2	0.782486	0.427902	0.1429	0.8571
C14H12O3	0.537477	0.638755	0.2143	0.8571
C14H12O3N2	0.688252	0.516757	0.2143	0.8571
C14H12O4	0.47857	0.682311	0.2857	0.8571
C14H12O4N2	-0.135349	0.913569	0.2857	0.8571
C14H12O4S1	-0.341487	0.778139	0.2857	0.8571
C14H12O5	0.0436605	0.972196	0.3571	0.8571
C14H12O5N2	0.277241	0.82116	0.3571	0.8571
C14H12O5S1	0.277886	0.820733	0.3571	0.8571
C14H12O6	-0.045428	0.97107	0.4286	0.8571
C14H12O6N2	0.275816	0.822104	0.4286	0.8571
C14H12O6N2S1	-0.3987	0.738923	0.4286	0.8571
C14H12O6S1	-0.104221	0.93353	0.4286	0.8571
C14H12O7	-0.885105	0.308173	0.5	0.8571
C14H12O7N2	0.190213	0.878164	0.5	0.8571
C14H12O7S1	-0.696863	0.509157	0.5	0.8571
C14H12O8	0.392719	0.743069	0.5714	0.8571
C14H12O8N2	0.827563	0.379454	0.5714	0.8571
C14H12O8S1	-0.896576	0.292093	0.5714	0.8571
C14H12O9	0.246393	0.841509	0.6429	0.8571
C14H13O2N1	0.689404	0.515745	0.1429	0.9286
C14H13O3N1	-0.164667	0.89469	0.2143	0.9286
C14H13O4N1	-0.584955	0.602225	0.2857	0.9286
C14H13O4N1S1	-0.810376	0.398526	0.2857	0.9286
C14H13O5N1	-0.0538931	0.965674	0.3571	0.9286
C14H13O5N1S1	-0.000467	0.999702	0.3571	0.9286
C14H13O6N1	0.252642	0.837401	0.4286	0.9286
C14H13O6N1S1	-0.835609	0.37023	0.4286	0.9286
C14H13O7N1	0.136832	0.912616	0.5	0.9286
C14H13O7N1S1	0.0655553	0.958236	0.5	0.9286
C14H13O8N1	0.549864	0.629359	0.5714	0.9286
C14H13O8N1S1	-0.498714	0.667612	0.5714	0.9286
C14H13O9N1	0.930339	0.239026	0.6429	0.9286
C14H14O10	0.877629	0.318248	0.7143	1
C14H14O2	-0.917645	0.260176	0.1429	1
C14H14O2N2	0.98767	0.100074	0.1429	1
C14H14O3	-0.796406	0.413464	0.2143	1
C14H14O3N2	0.93423	0.232177	0.2143	1
C14H14O3S1	0.999984	0.00357893	0.2143	1
C14H14O4	-0.990193	0.0892304	0.2857	1
C14H14O4N2	0.494132	0.670972	0.2857	1
C14H14O4S1	-0.0122755	0.992185	0.2857	1
C14H14O5	0.613225	0.579743	0.3571	1
C14H14O5N2	0.296526	0.808344	0.3571	1
C14H14O5S1	-0.311393	0.798409	0.3571	1
C14H14O6	0.138672	0.911433	0.4286	1
C14H14O6N2	0.0971952	0.938026	0.4286	1
C14H14O6N2S1	-0.954756	0.192232	0.4286	1
C14H14O6S1	-0.769809	0.440703	0.4286	1
C14H14O7	-0.0539145	0.96566	0.5	1
C14H14O7N2	0.556463	0.624317	0.5	1
C14H14O7N2S1	-0.187674	0.87981	0.5	1
C14H14O7S1	0.164924	0.894524	0.5	1
C14H14O8	0.487349	0.675928	0.5714	1
C14H14O8N2	0.451311	0.701913	0.5714	1
C14H14O8S1	-0.994874	0.0644878	0.5714	1
C14H14O9	0.888709	0.303206	0.6429	1
C14H14O9N2	0.815445	0.392985	0.6429	1
C14H14O9S1	0.407601	0.732731	0.6429	1
C14H15O2N1	0.983084	0.117262	0.1429	1.0714
C14H15O3N1	-0.372305	0.757135	0.2143	1.0714
C14H15O3N3S1	-0.525057	0.648088	0.2143	1.0714
C14H15O4N1	0.632918	0.563714	0.2857	1.0714
C14H15O4N1S1	-0.795416	0.414504	0.2857	1.0714
C14H15O5N1	0.428149	0.718332	0.3571	1.0714
C14H15O5N1S1	-0.931196	0.237533	0.3571	1.0714
C14H15O6N1	0.261744	0.831405	0.4286	1.0714
C14H15O6N1S1	-0.487843	0.675568	0.4286	1.0714
C14H15O7N1	0.517487	0.653735	0.5	1.0714
C14H15O7N1S1	-0.965251	0.168318	0.5	1.0714
C14H15O8N1	0.737512	0.472001	0.5714	1.0714
C14H15O8N1S1	-0.366537	0.761086	0.5714	1.0714
C14H15O9N1	0.824076	0.38339	0.6429	1.0714
C14H16O1	0.962752	0.174302	0.0714	1.1429
C14H16O10	0.758635	0.451733	0.7143	1.1429
C14H16O11	0.857502	0.344031	0.7857	1.1429
C14H16O2	0.455984	0.698575	0.1429	1.1429
C14H16O2N2	0.959746	0.181246	0.1429	1.1429
C14H16O3	0.560281	0.621386	0.2143	1.1429
C14H16O3N2	-0.984637	0.111734	0.2143	1.1429
C14H16O3S1	-0.55936	0.622094	0.2143	1.1429
C14H16O4	0.0930007	0.940708	0.2857	1.1429
C14H16O4N2	0.317798	0.794113	0.2857	1.1429
C14H16O4N2S1	-0.975398	0.141506	0.2857	1.1429
C14H16O4S1	-0.045587	0.970968	0.2857	1.1429
C14H16O5	-0.013226	0.99158	0.3571	1.1429
C14H16O5N2	0.751214	0.458937	0.3571	1.1429
C14H16O5N2S1	-0.791467	0.418635	0.3571	1.1429
C14H16O5S1	-0.163967	0.895142	0.3571	1.1429
C14H16O6	0.643723	0.554777	0.4286	1.1429
C14H16O6N2	0.248562	0.840084	0.4286	1.1429
C14H16O6N2S1	0.731781	0.477379	0.4286	1.1429
C14H16O6S1	0.0833255	0.946892	0.4286	1.1429
C14H16O7	0.629805	0.56627	0.5	1.1429
C14H16O7N2	0.276121	0.821902	0.5	1.1429
C14H16O7N2S1	-0.292773	0.810844	0.5	1.1429
C14H16O7S1	0.150819	0.903618	0.5	1.1429
C14H16O8	-0.97479	0.143252	0.5714	1.1429
C14H16O8N2	0.478295	0.68251	0.5714	1.1429
C14H16O8S1	0.430143	0.716926	0.5714	1.1429
C14H16O9	0.862791	0.337429	0.6429	1.1429
C14H16O9N2	0.938812	0.223855	0.6429	1.1429
C14H16O9S1	0.499717	0.666875	0.6429	1.1429
C14H17O10N1	0.999368	0.0226315	0.7143	1.2143
C14H17O2N1	0.665803	0.536179	0.1429	1.2143
C14H17O3N1	0.718512	0.489647	0.2143	1.2143
C14H17O4N1	0.440517	0.70959	0.2857	1.2143
C14H17O5N1	0.208057	0.866572	0.3571	1.2143
C14H17O5N1S1	-0.876005	0.320399	0.3571	1.2143
C14H17O6N1	0.10474	0.933198	0.4286	1.2143
C14H17O6N1S1	-0.566476	0.616613	0.4286	1.2143
C14H17O7N1	0.223294	0.856638	0.5	1.2143
C14H17O7N1S1	0.649468	0.549983	0.5	1.2143
C14H17O8N1	0.596413	0.593184	0.5714	1.2143
C14H17O8N1S1	0.720596	0.487736	0.5714	1.2143
C14H17O9N1	0.966629	0.164927	0.6429	1.2143
C14H18O1	-0.942182	0.217541	0.0714	1.2857
C14H18O10	0.975688	0.140666	0.7143	1.2857
C14H18O2	-0.543299	0.63435	0.1429	1.2857
C14H18O2N2	0.318307	0.793772	0.1429	1.2857
C14H18O3	0.501654	0.66545	0.2143	1.2857
C14H18O3N2	-0.916278	0.262358	0.2143	1.2857
C14H18O3S1	-0.186395	0.880639	0.2143	1.2857
C14H18O4	-0.533654	0.641637	0.2857	1.2857
C14H18O4N2	0.220012	0.858781	0.2857	1.2857
C14H18O4S1	0.991263	0.0842175	0.2857	1.2857
C14H18O5	-0.682857	0.521475	0.3571	1.2857
C14H18O5N2	0.278179	0.820538	0.3571	1.2857
C14H18O5N2S1	-0.107368	0.931516	0.3571	1.2857
C14H18O5S1	-0.942492	0.216951	0.3571	1.2857
C14H18O6	-0.0814801	0.948071	0.4286	1.2857
C14H18O6N2	0.580503	0.605712	0.4286	1.2857
C14H18O6N2S1	-0.995543	0.060128	0.4286	1.2857
C14H18O6S1	0.169981	0.891259	0.4286	1.2857
C14H18O7	-0.530457	0.644041	0.5	1.2857
C14H18O7N2	0.453648	0.700245	0.5	1.2857
C14H18O7N2S1	-0.705193	0.50172	0.5	1.2857
C14H18O7S1	0.103125	0.934232	0.5	1.2857
C14H18O8	0.491063	0.673217	0.5714	1.2857
C14H18O8N2	0.746564	0.463404	0.5714	1.2857
C14H18O8S1	0.45707	0.697798	0.5714	1.2857
C14H18O9	-0.437624	0.71164	0.6429	1.2857
C14H18O9S1	0.595452	0.593946	0.6429	1.2857
C14H19O2N1	0.405774	0.734004	0.1429	1.3571
C14H19O3N1	0.982991	0.117587	0.2143	1.3571
C14H19O4N1	-0.940343	0.221009	0.2857	1.3571
C14H19O5N1	0.470814	0.687921	0.3571	1.3571
C14H19O6N1	0.0527862	0.96638	0.4286	1.3571
C14H19O6N1S1	-0.491927	0.672586	0.4286	1.3571
C14H19O7N1	0.30111	0.805286	0.5	1.3571
C14H19O7N1S1	-0.868952	0.329589	0.5	1.3571
C14H19O7N3	0.967219	0.163454	0.5	1.3571
C14H19O8N1	0.515327	0.655341	0.5714	1.3571
C14H19O8N1S1	0.205811	0.868033	0.5714	1.3571
C14H19O9N1	0.979172	0.130159	0.6429	1.3571
C14H20O1	0.998935	0.0293904	0.0714	1.4286
C14H20O10	0.955688	0.190226	0.7143	1.4286
C14H20O10S1	0.851766	0.351064	0.7143	1.4286
C14H20O2	0.494021	0.671053	0.1429	1.4286
C14H20O2N2	0.0924434	0.941065	0.1429	1.4286
C14H20O3	0.546071	0.632246	0.2143	1.4286
C14H20O3N2	0.756788	0.453535	0.2143	1.4286
C14H20O3S1	-0.101835	0.935057	0.2143	1.4286
C14H20O4	0.399856	0.73812	0.2857	1.4286
C14H20O4N2	0.475352	0.684642	0.2857	1.4286
C14H20O4S1	0.99986	0.0106691	0.2857	1.4286
C14H20O5	0.990975	0.0855933	0.3571	1.4286
C14H20O5N2	0.633097	0.563567	0.3571	1.4286
C14H20O5S1	-0.0488746	0.968873	0.3571	1.4286
C14H20O6	0.12415	0.920759	0.4286	1.4286
C14H20O6N2	0.365456	0.761826	0.4286	1.4286
C14H20O6S1	0.225664	0.85509	0.4286	1.4286
C14H20O7	0.12365	0.92108	0.5	1.4286
C14H20O7S1	0.0385676	0.975441	0.5	1.4286
C14H20O7S2	-0.999926	0.00776203	0.5	1.4286
C14H20O8	0.424088	0.721189	0.5714	1.4286
C14H20O8N2	0.658893	0.54205	0.5714	1.4286
C14H20O8S1	0.34712	0.774319	0.5714	1.4286
C14H20O9	0.542937	0.634624	0.6429	1.4286
C14H20O9S1	0.0379143	0.975857	0.6429	1.4286
C14H21O2N1	-0.110559	0.929472	0.1429	1.5
C14H21O4N1	0.189204	0.878818	0.2857	1.5
C14H21O5N1	-0.0509738	0.967535	0.3571	1.5
C14H21O5N1S1	-0.458074	0.697079	0.3571	1.5
C14H21O5N3	-0.475722	0.684374	0.3571	1.5
C14H21O6N1	0.132935	0.915119	0.4286	1.5
C14H21O6N1S1	0.974521	0.144017	0.4286	1.5
C14H21O6N3	0.21826	0.859924	0.4286	1.5
C14H21O6N5S2	-0.226375	0.854625	0.4286	1.5
C14H21O7N1	0.227236	0.854062	0.5	1.5
C14H21O7N1S1	0.729193	0.479791	0.5	1.5
C14H21O7N3	0.947237	0.207724	0.5	1.5
C14H21O8N1	0.302451	0.804391	0.5714	1.5
C14H21O8N1S1	0.940679	0.220379	0.5714	1.5
C14H21O9N1	0.99679	0.0510257	0.6429	1.5
C14H22O10	0.85408	0.348241	0.7143	1.5714
C14H22O10S1	0.997088	0.0485965	0.7143	1.5714
C14H22O3S1	-0.0775995	0.950549	0.2143	1.5714
C14H22O4S1	-0.212585	0.863624	0.2857	1.5714
C14H22O5	0.628152	0.567623	0.3571	1.5714
C14H22O5S1	-0.376396	0.754326	0.3571	1.5714
C14H22O6	0.257844	0.833976	0.4286	1.5714
C14H22O6N2	0.494128	0.670975	0.4286	1.5714
C14H22O6S1	-0.581332	0.605064	0.4286	1.5714
C14H22O7	0.797032	0.412804	0.5	1.5714
C14H22O7N2	0.407663	0.732687	0.5	1.5714
C14H22O7S1	0.753663	0.45657	0.5	1.5714
C14H22O8	0.420954	0.723391	0.5714	1.5714
C14H22O8S1	0.868461	0.33022	0.5714	1.5714
C14H22O9	0.377257	0.753735	0.6429	1.5714
C14H22O9S1	0.976496	0.138298	0.6429	1.5714
C14H23O4N1	-0.787509	0.422741	0.2857	1.6429
C14H23O5N1	0.611149	0.581415	0.3571	1.6429
C14H23O6N1	0.0384796	0.975497	0.4286	1.6429
C14H23O6N1S1	-0.888478	0.303527	0.4286	1.6429
C14H23O6N3	-0.0913573	0.941759	0.4286	1.6429
C14H23O7N1	-0.0487347	0.968962	0.5	1.6429
C14H23O7N1S1	0.785236	0.425084	0.5	1.6429
C14H23O8N1	0.581411	0.605001	0.5714	1.6429
C14H24O2	0.0737676	0.952995	0.1429	1.7143
C14H24O3	-0.141292	0.909749	0.2143	1.7143
C14H24O4	-0.44793	0.704323	0.2857	1.7143
C14H24O4S1	-0.0670651	0.957273	0.2857	1.7143
C14H24O5S1	-0.397015	0.740092	0.3571	1.7143
C14H24O6	0.439413	0.710373	0.4286	1.7143
C14H24O6S1	0.134203	0.914305	0.4286	1.7143
C14H24O7	0.448066	0.704226	0.5	1.7143
C14H24O7S1	0.981575	0.122396	0.5	1.7143
C14H24O8	0.423672	0.721482	0.5714	1.7143
C14H24O8S1	0.998698	0.0324932	0.5714	1.7143
C14H24O9	0.339735	0.779325	0.6429	1.7143
C14H24O9S1	0.997206	0.0475963	0.6429	1.7143
C14H26O10	-0.748704	0.461353	0.7143	1.8571
C14H26O4	-0.474999	0.684896	0.2857	1.8571
C14H26O4S1	0.284021	0.816663	0.2857	1.8571
C14H26O5	0.132733	0.91525	0.3571	1.8571
C14H26O5S1	-0.899136	0.288392	0.3571	1.8571
C14H26O6	0.365427	0.761846	0.4286	1.8571
C14H26O6S1	-0.999958	0.00584765	0.4286	1.8571
C14H26O7	0.911804	0.269379	0.5	1.8571
C14H28O11S1	0.924989	0.248148	0.7857	2
C14H28O3S1	-0.812757	0.395931	0.2143	2
C14H28O4S1	0.993907	0.0703139	0.2857	2
C14H30O4S1	0.910325	0.271664	0.2857	2.1429
C14H30O5S1	-0.859743	0.341247	0.3571	2.1429
C14H7O6N1	-0.320208	0.792494	0.4286	0.5
C14H7O7N1	0.9513	0.199497	0.5	0.5
C14H8O3	0.609978	0.582356	0.2143	0.5714
C14H8O4	0.999672	0.0163051	0.2857	0.5714
C14H8O4N2	-0.328025	0.787234	0.2857	0.5714
C14H8O4S1	0.452534	0.70104	0.2857	0.5714
C14H8O5	0.816151	0.392207	0.3571	0.5714
C14H8O5N2	0.91348	0.266769	0.3571	0.5714
C14H8O6	0.391767	0.743728	0.4286	0.5714
C14H8O6N2	0.863142	0.336987	0.4286	0.5714
C14H8O6S1	0.999822	0.0120132	0.4286	0.5714
C14H8O7	0.57482	0.610144	0.5	0.5714
C14H8O8	0.565808	0.617128	0.5714	0.5714
C14H8O9	0.196792	0.873895	0.6429	0.5714
C14H9O2N1	0.988957	0.0946967	0.1429	0.6429
C14H9O3N1	0.965881	0.166778	0.2143	0.6429
C14H9O4N1	0.143996	0.908009	0.2857	0.6429
C14H9O5N1	0.154717	0.901107	0.3571	0.6429
C14H9O6N1	-0.190188	0.878181	0.4286	0.6429
C14H9O7N1	0.129891	0.917074	0.5	0.6429
C14H9O7N1S1	-0.190438	0.878018	0.5	0.6429
C14H9O8N1	0.594551	0.59466	0.5714	0.6429
C15H10O10	0.171616	0.890202	0.6667	0.6667
C15H10O2	0.926559	0.245504	0.1333	0.6667
C15H10O3	0.925522	0.247253	0.2	0.6667
C15H10O4	0.983348	0.11634	0.2667	0.6667
C15H10O4N2	0.999731	0.0147676	0.2667	0.6667
C15H10O5	-0.0955933	0.93905	0.3333	0.6667
C15H10O5N2	0.996742	0.0514041	0.3333	0.6667
C15H10O5S1	0.373621	0.756232	0.3333	0.6667
C15H10O6	0.175023	0.888	0.4	0.6667
C15H10O6N2	0.701668	0.504878	0.4	0.6667
C15H10O6S1	0.971814	0.151509	0.4	0.6667
C15H10O7	-0.0199289	0.987312	0.4667	0.6667
C15H10O7N2	0.490257	0.673806	0.4667	0.6667
C15H10O7S1	-0.985283	0.109355	0.4667	0.6667
C15H10O8	0.38933	0.745413	0.5333	0.6667
C15H10O8N2	0.938751	0.223968	0.5333	0.6667
C15H10O8S1	-0.638762	0.558894	0.5333	0.6667
C15H10O9	0.278422	0.820377	0.6	0.6667
C15H11O3N1	-0.996472	0.0534947	0.2	0.7333
C15H11O4N1	-0.877702	0.318151	0.2667	0.7333
C15H11O5N1	-0.763966	0.446499	0.3333	0.7333
C15H11O5N1S1	-0.929212	0.240975	0.3333	0.7333
C15H11O6N1	0.200277	0.871632	0.4	0.7333
C15H11O6N1S1	-0.471321	0.687555	0.4	0.7333
C15H11O7N1	0.0561307	0.964247	0.4667	0.7333
C15H11O7N1S1	0.10669	0.931949	0.4667	0.7333
C15H11O8N1	0.130957	0.91639	0.5333	0.7333
C15H11O9N1	0.936148	0.228729	0.6	0.7333
C15H12O10	0.325577	0.788883	0.6667	0.8
C15H12O11	0.454896	0.699353	0.7333	0.8
C15H12O2	-0.988522	0.0965474	0.1333	0.8
C15H12O3	0.450618	0.702408	0.2	0.8
C15H12O3N2	0.999914	0.0083444	0.2	0.8
C15H12O4	0.770465	0.440048	0.2667	0.8
C15H12O4N2	-0.810194	0.398724	0.2667	0.8
C15H12O4S1	-0.441253	0.709069	0.2667	0.8
C15H12O5	-0.370489	0.75838	0.3333	0.8
C15H12O5N2	0.257798	0.834006	0.3333	0.8
C15H12O5S1	-0.316873	0.794734	0.3333	0.8
C15H12O6	0.128705	0.917836	0.4	0.8
C15H12O6N2	0.60952	0.582724	0.4	0.8
C15H12O6S1	0.999997	0.00142752	0.4	0.8
C15H12O7	0.339048	0.77979	0.4667	0.8
C15H12O7N2	0.0772858	0.950749	0.4667	0.8
C15H12O7S1	-0.966638	0.164906	0.4667	0.8
C15H12O8	0.0650136	0.958582	0.5333	0.8
C15H12O8N2	0.184796	0.881675	0.5333	0.8
C15H12O8S1	-0.751952	0.458225	0.5333	0.8
C15H12O9	0.312202	0.797867	0.6	0.8
C15H12O9N2	0.567829	0.615567	0.6	0.8
C15H12O9S1	0.539554	0.637186	0.6	0.8
C15H13O3N1	0.324271	0.789762	0.2	0.8667
C15H13O4N1	-0.99998	0.00397805	0.2667	0.8667
C15H13O5N1	0.675	0.528287	0.3333	0.8667
C15H13O5N1S1	-0.974478	0.144139	0.3333	0.8667
C15H13O6N1	-0.238747	0.846527	0.4	0.8667
C15H13O6N1S1	-0.0933087	0.940511	0.4	0.8667
C15H13O7N1	0.120432	0.923144	0.4667	0.8667
C15H13O7N1S1	-0.753549	0.456681	0.4667	0.8667
C15H13O8N1	-0.0849252	0.94587	0.5333	0.8667
C15H13O8N1S1	-0.784203	0.426144	0.5333	0.8667
C15H13O9N1	0.510321	0.659053	0.6	0.8667
C15H14O10	0.662668	0.538848	0.6667	0.9333
C15H14O11	0.983991	0.114065	0.7333	0.9333
C15H14O2	0.173183	0.88919	0.1333	0.9333
C15H14O3	-0.537363	0.638841	0.2	0.9333
C15H14O3N2	0.0783314	0.950082	0.2	0.9333
C15H14O4	-0.879691	0.315499	0.2667	0.9333
C15H14O4N2	-0.367683	0.760302	0.2667	0.9333
C15H14O4S1	-0.40466	0.73478	0.2667	0.9333
C15H14O5	-0.495258	0.670147	0.3333	0.9333
C15H14O5N2	0.257374	0.834286	0.3333	0.9333
C15H14O5S1	-0.0867274	0.944718	0.3333	0.9333
C15H14O6	0.113351	0.927683	0.4	0.9333
C15H14O6N2	-0.452913	0.70077	0.4	0.9333
C15H14O6N2S1	-0.995508	0.0603651	0.4	0.9333
C15H14O6S1	-0.103534	0.93397	0.4	0.9333
C15H14O7	-0.0649387	0.95863	0.4667	0.9333
C15H14O7N2	0.160862	0.897145	0.4667	0.9333
C15H14O7N2S1	0.74805	0.46198	0.4667	0.9333
C15H14O7S1	-0.671397	0.531389	0.4667	0.9333
C15H14O8	0.684351	0.520171	0.5333	0.9333
C15H14O8N2	0.568803	0.614814	0.5333	0.9333
C15H14O8S1	-0.436294	0.712582	0.5333	0.9333
C15H14O9	0.376607	0.754181	0.6	0.9333
C15H14O9N2	0.919424	0.25731	0.6	0.9333
C15H14O9S1	-0.00177401	0.998871	0.6	0.9333
C15H15O10N1	0.846815	0.357034	0.6667	1
C15H15O2N1	0.957964	0.185241	0.1333	1
C15H15O3N1	-0.764339	0.446131	0.2	1
C15H15O3P1	-0.193535	0.876009	0.2	1
C15H15O4N1	0.69218	0.5133	0.2667	1
C15H15O5N1	-0.818363	0.389763	0.3333	1
C15H15O5N1S1	-0.509609	0.65958	0.3333	1
C15H15O6N1	-0.0558556	0.964423	0.4	1
C15H15O6N1S1	-0.990229	0.0890679	0.4	1
C15H15O7N1	0.257683	0.834082	0.4667	1
C15H15O7N1S1	-0.620815	0.573603	0.4667	1
C15H15O8N1	0.313062	0.797291	0.5333	1
C15H15O8N1S1	0.979544	0.128987	0.5333	1
C15H15O9N1	0.841305	0.363575	0.6	1
C15H16O10	0.697028	0.509011	0.6667	1.0667
C15H16O10N2	0.223848	0.856276	0.6667	1.0667
C15H16O10S1	0.990099	0.0896611	0.6667	1.0667
C15H16O11	0.987296	0.101585	0.7333	1.0667
C15H16O2	-0.947511	0.20718	0.1333	1.0667
C15H16O2N2	0.988177	0.0979931	0.1333	1.0667
C15H16O3	-0.989489	0.0923831	0.2	1.0667
C15H16O3N2	0.315619	0.795575	0.2	1.0667
C15H16O3S1	-0.023921	0.98477	0.2	1.0667
C15H16O4	0.999388	0.0222759	0.2667	1.0667
C15H16O4N2	-0.0184704	0.988241	0.2667	1.0667
C15H16O4S1	0.172761	0.889462	0.2667	1.0667
C15H16O5	0.837549	0.367976	0.3333	1.0667
C15H16O5N2	0.504865	0.663085	0.3333	1.0667
C15H16O5S1	-0.316251	0.795152	0.3333	1.0667
C15H16O6	0.575524	0.609596	0.4	1.0667
C15H16O6N2	0.514296	0.656106	0.4	1.0667
C15H16O6N2S1	-0.735985	0.473439	0.4	1.0667
C15H16O6S1	-0.894349	0.295279	0.4	1.0667
C15H16O7	-0.470855	0.687891	0.4667	1.0667
C15H16O7N2	0.447118	0.704901	0.4667	1.0667
C15H16O7N2S1	0.666766	0.535356	0.4667	1.0667
C15H16O7S1	0.132437	0.915439	0.4667	1.0667
C15H16O8	0.312195	0.797871	0.5333	1.0667
C15H16O8N2	0.451917	0.70148	0.5333	1.0667
C15H16O8N2S1	0.699025	0.507235	0.5333	1.0667
C15H16O8S1	-0.862122	0.33827	0.5333	1.0667
C15H16O9	0.572018	0.612321	0.6	1.0667
C15H16O9N2	0.979924	0.12778	0.6	1.0667
C15H16O9S1	0.99847	0.0352165	0.6	1.0667
C15H17O10N1	0.978934	0.130904	0.6667	1.1333
C15H17O3N1	0.997484	0.0451684	0.2	1.1333
C15H17O4N1	0.166904	0.893246	0.2667	1.1333
C15H17O5N1	0.469391	0.688947	0.3333	1.1333
C15H17O5N1S1	0.288004	0.814017	0.3333	1.1333
C15H17O6N1	0.359603	0.765824	0.4	1.1333
C15H17O6N1S1	-0.501307	0.665705	0.4	1.1333
C15H17O7N1	0.190559	0.87794	0.4667	1.1333
C15H17O7N1S1	-0.0534994	0.965925	0.4667	1.1333
C15H17O8N1	0.581759	0.604729	0.5333	1.1333
C15H17O8N1S1	0.586791	0.600782	0.5333	1.1333
C15H17O9N1	0.623521	0.571403	0.6	1.1333
C15H17O9N1S1	0.819234	0.388798	0.6	1.1333
C15H18O10	0.889277	0.302417	0.6667	1.2
C15H18O10S1	0.820596	0.387284	0.6667	1.2
C15H18O11	0.999196	0.0255337	0.7333	1.2
C15H18O2	0.679566	0.524337	0.1333	1.2
C15H18O2N2	0.992499	0.0780251	0.1333	1.2
C15H18O3	0.999884	0.00970056	0.2	1.2
C15H18O3N2	0.280695	0.81887	0.2	1.2
C15H18O3S1	-0.262108	0.831165	0.2	1.2
C15H18O4	-0.998747	0.0318775	0.2667	1.2
C15H18O4N2	0.99953	0.0195177	0.2667	1.2
C15H18O4S1	-0.519381	0.652325	0.2667	1.2
C15H18O5	0.206161	0.867806	0.3333	1.2
C15H18O5N2	0.146907	0.906137	0.3333	1.2
C15H18O5S1	0.983815	0.114693	0.3333	1.2
C15H18O6	0.999509	0.0199571	0.4	1.2
C15H18O6N2	-0.937142	0.226923	0.4	1.2
C15H18O6N2S1	-0.688225	0.51678	0.4	1.2
C15H18O6S1	0.913923	0.266075	0.4	1.2
C15H18O7	0.281248	0.818503	0.4667	1.2
C15H18O7N2	0.355067	0.768916	0.4667	1.2
C15H18O7N2S1	0.329195	0.786445	0.4667	1.2
C15H18O7S1	0.0610459	0.961113	0.4667	1.2
C15H18O8	0.999748	0.014286	0.5333	1.2
C15H18O8N2	0.544747	0.633251	0.5333	1.2
C15H18O8S1	0.458468	0.696797	0.5333	1.2
C15H18O9	0.736369	0.473078	0.6	1.2
C15H18O9N2	0.738091	0.471455	0.6	1.2
C15H18O9S1	0.652308	0.547602	0.6	1.2
C15H19O10N1	0.997776	0.0424628	0.6667	1.2667
C15H19O2N1	0.229869	0.85234	0.1333	1.2667
C15H19O3N1	-0.0102399	0.993481	0.2	1.2667
C15H19O4N1	-0.575165	0.609876	0.2667	1.2667
C15H19O5N1	0.281242	0.818507	0.3333	1.2667
C15H19O5N1S1	-0.980622	0.125532	0.3333	1.2667
C15H19O6N1	0.130812	0.916483	0.4	1.2667
C15H19O6N1S1	0.257735	0.834048	0.4	1.2667
C15H19O7N1	0.199537	0.872112	0.4667	1.2667
C15H19O7N1S1	-0.815277	0.393169	0.4667	1.2667
C15H19O8N1	0.436279	0.712592	0.5333	1.2667
C15H19O8N1S1	0.744154	0.465705	0.5333	1.2667
C15H19O9N1	0.769797	0.440715	0.6	1.2667
C15H19O9N1S1	0.432888	0.714989	0.6	1.2667
C15H20O1	0.928881	0.241544	0.0667	1.3333
C15H20O10	-0.494686	0.670566	0.6667	1.3333
C15H20O10S1	0.987604	0.100341	0.6667	1.3333
C15H20O11	0.838838	0.36647	0.7333	1.3333
C15H20O2	0.930324	0.239051	0.1333	1.3333
C15H20O3	0.56502	0.617737	0.2	1.3333
C15H20O3N2	-0.395524	0.741126	0.2	1.3333
C15H20O3S1	-0.243246	0.843575	0.2	1.3333
C15H20O4	0.955308	0.191048	0.2667	1.3333
C15H20O4N2	0.675548	0.527814	0.2667	1.3333
C15H20O4S1	0.998971	0.0288763	0.2667	1.3333
C15H20O5	-0.310016	0.799331	0.3333	1.3333
C15H20O5N2	0.247932	0.840498	0.3333	1.3333
C15H20O5S1	-0.0956641	0.939005	0.3333	1.3333
C15H20O6	-0.463372	0.693278	0.4	1.3333
C15H20O6N2	0.113575	0.927539	0.4	1.3333
C15H20O6S1	0.249899	0.839205	0.4	1.3333
C15H20O7	0.25612	0.835111	0.4667	1.3333
C15H20O7N2	0.288121	0.813939	0.4667	1.3333
C15H20O7N2S1	-0.157163	0.89953	0.4667	1.3333
C15H20O7S1	0.971657	0.151931	0.4667	1.3333
C15H20O8	0.301179	0.80524	0.5333	1.3333
C15H20O8N2	0.461756	0.694439	0.5333	1.3333
C15H20O8S1	0.190038	0.878278	0.5333	1.3333
C15H20O9	0.52073	0.651319	0.6	1.3333
C15H20O9N2	0.527374	0.646354	0.6	1.3333
C15H20O9S1	0.99582	0.0582274	0.6	1.3333
C15H21O10N1	0.829661	0.377068	0.6667	1.4
C15H21O3N1	0.774814	0.435687	0.2	1.4
C15H21O4N1	0.419878	0.724146	0.2667	1.4
C15H21O5N1	0.117505	0.925021	0.3333	1.4
C15H21O5N1S1	-0.863476	0.336565	0.3333	1.4
C15H21O6N1	0.117187	0.925225	0.4	1.4
C15H21O6N1S1	-0.696549	0.509435	0.4	1.4
C15H21O7N1	0.158629	0.898585	0.4667	1.4
C15H21O7N1S1	-0.0682753	0.956501	0.4667	1.4
C15H21O7N3	-0.0945767	0.9397	0.4667	1.4
C15H21O8N1	0.310056	0.799304	0.5333	1.4
C15H21O8N1S1	0.497235	0.668698	0.5333	1.4
C15H21O9N1	0.562146	0.619952	0.6	1.4
C15H22O1	-0.911839	0.269325	0.0667	1.4667
C15H22O10	0.586754	0.600811	0.6667	1.4667
C15H22O10S1	0.934632	0.231458	0.6667	1.4667
C15H22O11	0.507974	0.660789	0.7333	1.4667
C15H22O3S1	-0.0201726	0.987157	0.2	1.4667
C15H22O4	-0.996219	0.0553767	0.2667	1.4667
C15H22O4S1	0.101673	0.935161	0.2667	1.4667
C15H22O5	-0.514333	0.656079	0.3333	1.4667
C15H22O5N2	-0.510383	0.659008	0.3333	1.4667
C15H22O5S1	-0.45571	0.698771	0.3333	1.4667
C15H22O6	-0.95534	0.190979	0.4	1.4667
C15H22O6S1	-0.0625074	0.960181	0.4	1.4667
C15H22O7	0.425342	0.720307	0.4667	1.4667
C15H22O7N2	0.118862	0.924151	0.4667	1.4667
C15H22O7S1	-0.261272	0.831716	0.4667	1.4667
C15H22O7S2	-0.998461	0.0353245	0.4667	1.4667
C15H22O8	0.431061	0.716278	0.5333	1.4667
C15H22O8N2	0.556631	0.624187	0.5333	1.4667
C15H22O8S1	0.13431	0.914236	0.5333	1.4667
C15H22O9	0.423183	0.721826	0.6	1.4667
C15H22O9S1	0.834326	0.371714	0.6	1.4667
C15H23O3N1	-0.361224	0.764718	0.2	1.5333
C15H23O4N1	0.92031	0.255872	0.2667	1.5333
C15H23O5N1	-0.362638	0.763752	0.3333	1.5333
C15H23O5N1S1	-0.892587	0.297776	0.3333	1.5333
C15H23O6N1	0.207846	0.866709	0.4	1.5333
C15H23O6N1S1	-0.968028	0.161416	0.4	1.5333
C15H23O6N3	-0.321347	0.791729	0.4	1.5333
C15H23O7N1	0.424883	0.72063	0.4667	1.5333
C15H23O7N1S1	-0.509151	0.659919	0.4667	1.5333
C15H23O8N1	0.368424	0.759795	0.5333	1.5333
C15H23O8N1S1	0.882586	0.311601	0.5333	1.5333
C15H23O9N1	0.717709	0.490382	0.6	1.5333
C15H24O1	-0.553373	0.626681	0.0667	1.6
C15H24O10	0.60368	0.587401	0.6667	1.6
C15H24O10S1	0.943911	0.214233	0.6667	1.6
C15H24O3S1	0.543113	0.634491	0.2	1.6
C15H24O4	0.42699	0.719148	0.2667	1.6
C15H24O4S1	0.951804	0.198454	0.2667	1.6
C15H24O5	-0.521946	0.650412	0.3333	1.6
C15H24O5S1	-0.447805	0.704412	0.3333	1.6
C15H24O6	0.501956	0.665228	0.4	1.6
C15H24O6N2	0.651853	0.547984	0.4	1.6
C15H24O6S1	-0.417555	0.725774	0.4	1.6
C15H24O7	-0.900377	0.286582	0.4667	1.6
C15H24O7N2	0.858655	0.342601	0.4667	1.6
C15H24O7S1	-0.311849	0.798103	0.4667	1.6
C15H24O8	0.2438	0.843212	0.5333	1.6
C15H24O8S1	0.963909	0.171556	0.5333	1.6
C15H24O9	0.260109	0.832483	0.6	1.6
C15H24O9S1	0.745668	0.464261	0.6	1.6
C15H25O6N1	0.25705	0.834499	0.4	1.6667
C15H25O6N1S1	-0.868646	0.329981	0.4	1.6667
C15H25O7N1	0.896473	0.292241	0.4667	1.6667
C15H25O7N1S1	-0.320857	0.792058	0.4667	1.6667
C15H25O8N1	-0.121522	0.922445	0.5333	1.6667
C15H26O3	0.0887754	0.943409	0.2	1.7333
C15H26O4	0.00778911	0.995041	0.2667	1.7333
C15H26O4S1	0.15363	0.901807	0.2667	1.7333
C15H26O5	0.498841	0.667518	0.3333	1.7333
C15H26O5S1	-0.56978	0.614057	0.3333	1.7333
C15H26O6	-0.451598	0.701708	0.4	1.7333
C15H26O6S1	-0.332123	0.78447	0.4	1.7333
C15H26O7	0.341798	0.777928	0.4667	1.7333
C15H26O7S1	0.689171	0.51595	0.4667	1.7333
C15H26O8	0.436103	0.712717	0.5333	1.7333
C15H26O8S1	0.809932	0.399008	0.5333	1.7333
C15H26O9	0.376405	0.75432	0.6	1.7333
C15H28O4	0.320259	0.79246	0.2667	1.8667
C15H28O5	-0.93077	0.238277	0.3333	1.8667
C15H28O5S1	-0.112992	0.927913	0.3333	1.8667
C15H28O6	0.00146791	0.999066	0.4	1.8667
C15H28O7	0.487955	0.675486	0.4667	1.8667
C15H28O8	0.428639	0.717986	0.5333	1.8667
C15H8O5	0.51118	0.658417	0.3333	0.5333
C15H8O6	0.662175	0.539267	0.4	0.5333
C15H8O6S1	0.881495	0.313076	0.4	0.5333
C15H8O7	0.462753	0.693724	0.4667	0.5333
C15H8O8	0.442591	0.708119	0.5333	0.5333
C15H9O4N1	0.989624	0.0917871	0.2667	0.6
C15H9O5N1	0.0967827	0.93829	0.3333	0.6
C15H9O6N1	0.28176	0.818164	0.4	0.6
C15H9O7N1	0.877905	0.317881	0.4667	0.6
C15H9O8N1	0.742393	0.467382	0.5333	0.6
C16H10O10	-0.734674	0.47467	0.625	0.625
C16H10O3	0.942089	0.217718	0.1875	0.625
C16H10O4	0.695813	0.510088	0.25	0.625
C16H10O5	0.105956	0.932419	0.3125	0.625
C16H10O6	0.199206	0.872328	0.375	0.625
C16H10O6N2	0.119808	0.923544	0.375	0.625
C16H10O7	-0.0319526	0.979655	0.4375	0.625
C16H10O7S1	0.973643	0.146488	0.4375	0.625
C16H10O8	0.283927	0.816725	0.5	0.625
C16H10O9	0.399545	0.738336	0.5625	0.625
C16H11O4N1	0.643319	0.555114	0.25	0.6875
C16H11O5N1	0.0893155	0.943064	0.3125	0.6875
C16H11O6N1	-0.121859	0.922229	0.375	0.6875
C16H11O7N1	0.61582	0.57765	0.4375	0.6875
C16H11O8N1	0.662327	0.539138	0.5	0.6875
C16H11O9N1	0.357492	0.767264	0.5625	0.6875
C16H12O10	0.207689	0.866812	0.625	0.75
C16H12O11	0.480089	0.681209	0.6875	0.75
C16H12O2	0.922375	0.252491	0.125	0.75
C16H12O3	0.965197	0.16845	0.1875	0.75
C16H12O4	0.247756	0.840614	0.25	0.75
C16H12O4N2	-0.132711	0.915264	0.25	0.75
C16H12O5N2	-0.764669	0.445805	0.3125	0.75
C16H12O6	-0.184273	0.882014	0.375	0.75
C16H12O6N2	0.436686	0.712304	0.375	0.75
C16H12O6S1	-0.521903	0.650444	0.375	0.75
C16H12O7	-0.203814	0.869332	0.4375	0.75
C16H12O7N2	-0.0508874	0.96759	0.4375	0.75
C16H12O7S1	-0.119143	0.923971	0.4375	0.75
C16H12O8	-0.909376	0.27312	0.5	0.75
C16H12O8N2	0.211302	0.86446	0.5	0.75
C16H12O8S1	0.0401228	0.97445	0.5	0.75
C16H12O9	0.0410612	0.973852	0.5625	0.75
C16H12O9N2	0.465013	0.692099	0.5625	0.75
C16H12O9S1	-0.539325	0.637359	0.5625	0.75
C16H13O10N1	0.71679	0.491221	0.625	0.8125
C16H13O3N1	-0.423142	0.721854	0.1875	0.8125
C16H13O4N1	-0.457031	0.697826	0.25	0.8125
C16H13O5N1	-0.427954	0.718469	0.3125	0.8125
C16H13O6N1	-0.432071	0.715566	0.375	0.8125
C16H13O7N1	0.133643	0.914665	0.4375	0.8125
C16H13O8N1	-0.0969692	0.93817	0.5	0.8125
C16H13O8N1S1	0.217031	0.860725	0.5	0.8125
C16H13O9N1	0.0252524	0.983922	0.5625	0.8125
C16H14O10	0.168257	0.892372	0.625	0.875
C16H14O11	0.560077	0.621543	0.6875	0.875
C16H14O2	-0.525228	0.64796	0.125	0.875
C16H14O3	-0.17756	0.886359	0.1875	0.875
C16H14O4	0.0138356	0.991192	0.25	0.875
C16H14O4N2	-0.0875487	0.944193	0.25	0.875
C16H14O5N2	-0.189916	0.878357	0.3125	0.875
C16H14O5S1	-0.0912479	0.941829	0.3125	0.875
C16H14O6	-0.251113	0.838407	0.375	0.875
C16H14O6N2	-0.295147	0.809262	0.375	0.875
C16H14O6S1	-0.961924	0.176243	0.375	0.875
C16H14O7	0.0489364	0.968834	0.4375	0.875
C16H14O7N2	0.31839	0.793716	0.4375	0.875
C16H14O7S1	-0.999113	0.0268118	0.4375	0.875
C16H14O8	-0.138267	0.911693	0.5	0.875
C16H14O8N2	0.477702	0.682939	0.5	0.875
C16H14O8S1	-0.977561	0.135119	0.5	0.875
C16H14O9	0.706839	0.500241	0.5625	0.875
C16H14O9N2	0.651375	0.548385	0.5625	0.875
C16H14O9S1	0.538153	0.638245	0.5625	0.875
C16H15O10N1	0.591945	0.59672	0.625	0.9375
C16H15O3N1	0.0614482	0.960856	0.1875	0.9375
C16H15O4N1	0.491222	0.673101	0.25	0.9375
C16H15O5N1	-0.907009	0.276719	0.3125	0.9375
C16H15O6N1	0.274874	0.822728	0.375	0.9375
C16H15O6N1S1	0.230614	0.851853	0.375	0.9375
C16H15O7N1	-0.0506055	0.96777	0.4375	0.9375
C16H15O7N1S1	-0.34582	0.775201	0.4375	0.9375
C16H15O8N1	0.1301	0.91694	0.5	0.9375
C16H15O8N1S1	-0.464436	0.692514	0.5	0.9375
C16H15O9N1	0.343804	0.776569	0.5625	0.9375
C16H16O10	0.787546	0.422703	0.625	1
C16H16O10N2	0.301976	0.804707	0.625	1
C16H16O10S1	0.996615	0.0523976	0.625	1
C16H16O11	0.958755	0.183479	0.6875	1
C16H16O12	0.966816	0.164463	0.75	1
C16H16O2	0.0557488	0.964491	0.125	1
C16H16O3	-0.295981	0.808707	0.1875	1
C16H16O3N2	-0.536137	0.639766	0.1875	1
C16H16O3S1	-0.398996	0.738717	0.1875	1
C16H16O4	0.557564	0.623472	0.25	1
C16H16O4N2	0.51505	0.655547	0.25	1
C16H16O4S1	-0.162261	0.896243	0.25	1
C16H16O5	-0.999427	0.021553	0.3125	1
C16H16O5N2	-0.127094	0.91887	0.3125	1
C16H16O5S1	-0.113251	0.927747	0.3125	1
C16H16O6	-0.125483	0.919904	0.375	1
C16H16O6N2	-0.931396	0.237183	0.375	1
C16H16O6N2S1	0.151593	0.90312	0.375	1
C16H16O6S1	-0.568475	0.615067	0.375	1
C16H16O7	0.999499	0.0201528	0.4375	1
C16H16O7N2	0.770384	0.440129	0.4375	1
C16H16O7S1	-0.455307	0.699059	0.4375	1
C16H16O8	0.343235	0.776955	0.5	1
C16H16O8N2	0.235377	0.848735	0.5	1
C16H16O8S1	-0.772481	0.438031	0.5	1
C16H16O9	-0.531863	0.642984	0.5625	1
C16H16O9N2	0.582716	0.60398	0.5625	1
C16H16O9S1	0.961443	0.177359	0.5625	1
C16H17O10N1	0.456833	0.697967	0.625	1.0625
C16H17O3N1	-0.767811	0.442692	0.1875	1.0625
C16H17O3P1	-0.0247789	0.984224	0.1875	1.0625
C16H17O4N1	-0.768768	0.44174	0.25	1.0625
C16H17O5N1	-0.935884	0.229207	0.3125	1.0625
C16H17O5N1S1	0.164081	0.895068	0.3125	1.0625
C16H17O6N1	0.650798	0.548869	0.375	1.0625
C16H17O6N1S1	0.759397	0.450988	0.375	1.0625
C16H17O7N1	0.143508	0.908323	0.4375	1.0625
C16H17O7N1S1	-0.458531	0.696752	0.4375	1.0625
C16H17O8N1	0.548255	0.630585	0.5	1.0625
C16H17O8N1S1	-0.474141	0.685517	0.5	1.0625
C16H17O9N1	0.53306	0.642084	0.5625	1.0625
C16H17O9N1S1	0.0738104	0.952968	0.5625	1.0625
C16H18O10	0.748509	0.46154	0.625	1.125
C16H18O10N2	0.638597	0.55903	0.625	1.125
C16H18O10S1	-0.202224	0.870366	0.625	1.125
C16H18O11	0.922987	0.25148	0.6875	1.125
C16H18O11S1	-0.454653	0.699527	0.6875	1.125
C16H18O12	0.994186	0.0686826	0.75	1.125
C16H18O2	-0.0395281	0.974829	0.125	1.125
C16H18O3	0.47944	0.681679	0.1875	1.125
C16H18O3S1	-0.04515	0.971247	0.1875	1.125
C16H18O4	0.999086	0.0272166	0.25	1.125
C16H18O4N2	0.216851	0.860843	0.25	1.125
C16H18O4S1	0.0479328	0.969473	0.25	1.125
C16H18O5	0.767346	0.443153	0.3125	1.125
C16H18O5N2	0.999504	0.0200494	0.3125	1.125
C16H18O5S1	-0.194198	0.875579	0.3125	1.125
C16H18O6	-0.986695	0.103964	0.375	1.125
C16H18O6N2	0.406258	0.733667	0.375	1.125
C16H18O6N2S1	-0.849186	0.354186	0.375	1.125
C16H18O6S1	0.0631421	0.959776	0.375	1.125
C16H18O7	0.118072	0.924657	0.4375	1.125
C16H18O7N2	0.242686	0.843943	0.4375	1.125
C16H18O7N2S1	-0.955659	0.190289	0.4375	1.125
C16H18O7S1	-0.174309	0.888462	0.4375	1.125
C16H18O8	0.179691	0.88498	0.5	1.125
C16H18O8N2	0.182758	0.882995	0.5	1.125
C16H18O8N2S1	-0.485308	0.677415	0.5	1.125
C16H18O8S1	-0.259795	0.83269	0.5	1.125
C16H18O9	0.501508	0.665557	0.5625	1.125
C16H18O9N2	0.442021	0.708523	0.5625	1.125
C16H18O9S1	-0.863448	0.3366	0.5625	1.125
C16H19O10N1	0.924798	0.248468	0.625	1.1875
C16H19O11N1	0.977066	0.136604	0.6875	1.1875
C16H19O3N1	-0.946275	0.209626	0.1875	1.1875
C16H19O4N1	0.425682	0.720068	0.25	1.1875
C16H19O5N1	0.154565	0.901205	0.3125	1.1875
C16H19O5N1S1	-0.498211	0.667981	0.3125	1.1875
C16H19O6N1	0.178617	0.885675	0.375	1.1875
C16H19O6N1S1	-0.0714744	0.954459	0.375	1.1875
C16H19O7N1	0.165266	0.894303	0.4375	1.1875
C16H19O7N1S1	-0.597276	0.592499	0.4375	1.1875
C16H19O8N1	0.173337	0.88909	0.5	1.1875
C16H19O8N1S1	0.908476	0.274493	0.5	1.1875
C16H19O9N1	0.500445	0.666339	0.5625	1.1875
C16H19O9N1S1	-0.040175	0.974417	0.5625	1.1875
C16H20O10	0.539294	0.637383	0.625	1.25
C16H20O10N2	0.384004	0.74909	0.625	1.25
C16H20O10S1	0.97396	0.1456	0.625	1.25
C16H20O11	0.641594	0.556547	0.6875	1.25
C16H20O11S1	0.906137	0.278035	0.6875	1.25
C16H20O12	0.99304	0.0751523	0.75	1.25
C16H20O2	0.652885	0.547117	0.125	1.25
C16H20O3	0.543851	0.633931	0.1875	1.25
C16H20O3N2	-0.998709	0.0323552	0.1875	1.25
C16H20O4	0.999262	0.0244623	0.25	1.25
C16H20O4N2	-0.311865	0.798093	0.25	1.25
C16H20O4S1	0.980533	0.125821	0.25	1.25
C16H20O5	0.99998	0.00400224	0.3125	1.25
C16H20O5N2	0.10358	0.933941	0.3125	1.25
C16H20O5N2S1	-0.998082	0.0394394	0.3125	1.25
C16H20O5S1	-0.0899624	0.942651	0.3125	1.25
C16H20O6	0.999821	0.0120361	0.375	1.25
C16H20O6N2	0.0820941	0.947678	0.375	1.25
C16H20O6N2S1	-0.228285	0.853376	0.375	1.25
C16H20O6S1	0.0342332	0.978202	0.375	1.25
C16H20O7	0.121097	0.922718	0.4375	1.25
C16H20O7N2	0.368336	0.759855	0.4375	1.25
C16H20O7N2S1	-0.926894	0.244937	0.4375	1.25
C16H20O7S1	-0.00309295	0.998031	0.4375	1.25
C16H20O8	-0.527909	0.645953	0.5	1.25
C16H20O8N2	0.271049	0.825259	0.5	1.25
C16H20O8N2S1	0.576528	0.608815	0.5	1.25
C16H20O8S1	-0.174505	0.888335	0.5	1.25
C16H20O9	0.389792	0.745094	0.5625	1.25
C16H20O9N2	0.774852	0.435649	0.5625	1.25
C16H20O9N2S1	0.924043	0.249727	0.5625	1.25
C16H20O9S1	0.0612789	0.960964	0.5625	1.25
C16H21O10N1	0.842432	0.362246	0.625	1.3125
C16H21O11N1	0.971704	0.151805	0.6875	1.3125
C16H21O3N1	0.0348475	0.977811	0.1875	1.3125
C16H21O4N1	-0.322509	0.790947	0.25	1.3125
C16H21O5N1	0.338996	0.779825	0.3125	1.3125
C16H21O5N1S1	-0.982374	0.119704	0.3125	1.3125
C16H21O6N1	-0.0045757	0.997087	0.375	1.3125
C16H21O6N1S1	-0.541016	0.63608	0.375	1.3125
C16H21O7N1	0.0430841	0.972563	0.4375	1.3125
C16H21O7N1S1	-0.995177	0.0625508	0.4375	1.3125
C16H21O8N1	0.185423	0.881269	0.5	1.3125
C16H21O8N1S1	0.895193	0.294075	0.5	1.3125
C16H21O9N1	0.595159	0.594178	0.5625	1.3125
C16H21O9N1S1	0.968634	0.15987	0.5625	1.3125
C16H22O1	-0.771441	0.439072	0.0625	1.375
C16H22O10	-0.518202	0.653203	0.625	1.375
C16H22O10S1	0.759871	0.450524	0.625	1.375
C16H22O11	0.821474	0.386304	0.6875	1.375
C16H22O11S1	0.968403	0.16046	0.6875	1.375
C16H22O2	-0.999137	0.0264576	0.125	1.375
C16H22O3	-0.614449	0.578757	0.1875	1.375
C16H22O3S1	0.990462	0.0879982	0.1875	1.375
C16H22O4	-0.620721	0.57368	0.25	1.375
C16H22O4N2	0.670571	0.532098	0.25	1.375
C16H22O4S1	-0.01144	0.992717	0.25	1.375
C16H22O5	0.481458	0.680215	0.3125	1.375
C16H22O5N2	0.914663	0.264913	0.3125	1.375
C16H22O5S1	-0.456579	0.698149	0.3125	1.375
C16H22O6	0.215897	0.861465	0.375	1.375
C16H22O6N2	0.633575	0.563174	0.375	1.375
C16H22O6N2S1	-0.0451706	0.971234	0.375	1.375
C16H22O6S1	0.174913	0.888071	0.375	1.375
C16H22O7	0.16194	0.89645	0.4375	1.375
C16H22O7N2	0.351816	0.771129	0.4375	1.375
C16H22O7N2S1	-0.0285023	0.981852	0.4375	1.375
C16H22O7S1	-0.0254744	0.983781	0.4375	1.375
C16H22O8	0.413294	0.728756	0.5	1.375
C16H22O8N2	0.237872	0.8471	0.5	1.375
C16H22O8S1	0.550187	0.629113	0.5	1.375
C16H22O9	0.749804	0.460295	0.5625	1.375
C16H22O9N2	0.501152	0.66582	0.5625	1.375
C16H22O9N2S1	0.975306	0.14177	0.5625	1.375
C16H22O9S1	0.0881222	0.943827	0.5625	1.375
C16H23O10N1	0.923309	0.250947	0.625	1.4375
C16H23O4N1	0.720477	0.487846	0.25	1.4375
C16H23O5N1	0.262152	0.831135	0.3125	1.4375
C16H23O5N1S1	-0.762615	0.44783	0.3125	1.4375
C16H23O6N1	0.369165	0.759288	0.375	1.4375
C16H23O6N1S1	-0.0448345	0.971448	0.375	1.4375
C16H23O7N1	0.110858	0.929281	0.4375	1.4375
C16H23O7N1S1	-0.334679	0.782744	0.4375	1.4375
C16H23O7N3	-0.634995	0.562004	0.4375	1.4375
C16H23O8N1	0.182872	0.882921	0.5	1.4375
C16H23O8N1S1	0.947507	0.207187	0.5	1.4375
C16H23O9N1	0.643054	0.555334	0.5625	1.4375
C16H24O10	0.473155	0.68623	0.625	1.5
C16H24O10S1	0.750651	0.45948	0.625	1.5
C16H24O11	0.815459	0.392969	0.6875	1.5
C16H24O2	-0.168001	0.892538	0.125	1.5
C16H24O3S1	-0.090876	0.942067	0.1875	1.5
C16H24O4	-0.144326	0.907797	0.25	1.5
C16H24O4S1	-0.0138773	0.991165	0.25	1.5
C16H24O5	0.473666	0.685861	0.3125	1.5
C16H24O5S1	-0.0330814	0.978936	0.3125	1.5
C16H24O6	0.249043	0.839768	0.375	1.5
C16H24O6N2	0.323227	0.790465	0.375	1.5
C16H24O6S1	0.212729	0.86353	0.375	1.5
C16H24O7	0.056896	0.963759	0.4375	1.5
C16H24O7N2	-0.258713	0.833403	0.4375	1.5
C16H24O7S1	0.0665351	0.957611	0.4375	1.5
C16H24O8	0.187637	0.879834	0.5	1.5
C16H24O8N2	0.406308	0.733632	0.5	1.5
C16H24O8S1	-0.22194	0.857522	0.5	1.5
C16H24O9	-0.87569	0.320815	0.5625	1.5
C16H24O9N2	0.677004	0.526556	0.5625	1.5
C16H24O9S1	0.300831	0.805472	0.5625	1.5
C16H25O10N1	0.904214	0.280916	0.625	1.5625
C16H25O4N1	-0.678696	0.52509	0.25	1.5625
C16H25O5N1	0.317654	0.79421	0.3125	1.5625
C16H25O6N1	0.0307615	0.980414	0.375	1.5625
C16H25O6N1S1	-0.259847	0.832656	0.375	1.5625
C16H25O6N3	0.975926	0.139973	0.375	1.5625
C16H25O6N5S2	-0.456582	0.698147	0.375	1.5625
C16H25O7N1	0.708383	0.49885	0.4375	1.5625
C16H25O7N1S1	-0.994907	0.0642764	0.4375	1.5625
C16H25O8N1	0.141221	0.909794	0.5	1.5625
C16H25O9N1	0.841104	0.363812	0.5625	1.5625
C16H26O10	0.361912	0.764248	0.625	1.625
C16H26O10S1	0.902021	0.284167	0.625	1.625
C16H26O2	-0.500024	0.666649	0.125	1.625
C16H26O3	0.933591	0.233315	0.1875	1.625
C16H26O4	0.60948	0.582757	0.25	1.625
C16H26O4S1	-0.992153	0.0798076	0.25	1.625
C16H26O5	-0.485538	0.677247	0.3125	1.625
C16H26O5S1	-0.181363	0.883898	0.3125	1.625
C16H26O6	0.323285	0.790426	0.375	1.625
C16H26O6S1	0.141807	0.909418	0.375	1.625
C16H26O7	0.332715	0.784071	0.4375	1.625
C16H26O7N2	-0.681707	0.522476	0.4375	1.625
C16H26O7S1	-0.395953	0.740828	0.4375	1.625
C16H26O8	0.797258	0.412566	0.5	1.625
C16H26O8S1	0.479983	0.681286	0.5	1.625
C16H26O9	0.250119	0.83906	0.5625	1.625
C16H26O9S1	0.996115	0.0561339	0.5625	1.625
C16H27O6N1	-0.816503	0.391819	0.375	1.6875
C16H27O7N1	0.936352	0.228358	0.4375	1.6875
C16H27O7N1S1	-0.678487	0.525272	0.4375	1.6875
C16H27O8N1	0.752439	0.457754	0.5	1.6875
C16H28O3	0.242435	0.844108	0.1875	1.75
C16H28O5	0.819451	0.388557	0.3125	1.75
C16H28O5S1	0.0439648	0.972002	0.3125	1.75
C16H28O6	0.66331	0.538302	0.375	1.75
C16H28O6S1	-0.209577	0.865583	0.375	1.75
C16H28O7	0.334098	0.783137	0.4375	1.75
C16H28O7S1	0.396397	0.740521	0.4375	1.75
C16H28O8	-0.834574	0.371428	0.5	1.75
C16H28O9	0.0325275	0.979289	0.5625	1.75
C16H30O11	-0.854547	0.34767	0.6875	1.875
C16H30O5	-0.172333	0.889739	0.3125	1.875
C16H30O6	0.779136	0.431316	0.375	1.875
C16H32O3S1	-0.229788	0.852393	0.1875	2
C16H34O4S1	-0.644509	0.554124	0.25	2.125
C16H34O5S1	-0.773988	0.436518	0.3125	2.125
C16H34O6S1	-0.205608	0.868166	0.375	2.125
C16H8O6	0.0503999	0.967901	0.375	0.5
C16H8O7	0.245977	0.841782	0.4375	0.5
C16H8O8	0.253556	0.836799	0.5	0.5
C16H9O6N1	-0.0749374	0.952249	0.375	0.5625
C16H9O7N1	-0.183249	0.882677	0.4375	0.5625
C16H9O8N1	0.500804	0.666076	0.5	0.5625
C17H10O10	0.463704	0.69304	0.5882	0.5882
C17H10O5	0.77028	0.440233	0.2941	0.5882
C17H10O6	-0.0166861	0.989377	0.3529	0.5882
C17H10O7	0.681284	0.522843	0.4118	0.5882
C17H10O8	0.0241454	0.984627	0.4706	0.5882
C17H10O9	0.085978	0.945197	0.5294	0.5882
C17H11O4N1	-0.433782	0.714358	0.2353	0.6471
C17H11O5N1	-0.0464299	0.970431	0.2941	0.6471
C17H11O6N1	0.163422	0.895494	0.3529	0.6471
C17H11O7N1	-0.156304	0.900084	0.4118	0.6471
C17H11O8N1	-0.0141579	0.990986	0.4706	0.6471
C17H11O9N1	0.572047	0.612299	0.5294	0.6471
C17H12O10	0.124434	0.920577	0.5882	0.7059
C17H12O11	0.944849	0.212416	0.6471	0.7059
C17H12O3	0.891743	0.298965	0.1765	0.7059
C17H12O4	-0.928174	0.242756	0.2353	0.7059
C17H12O5	0.964962	0.169021	0.2941	0.7059
C17H12O5N2	-0.886141	0.306753	0.2941	0.7059
C17H12O6	-0.143156	0.90855	0.3529	0.7059
C17H12O6N2	0.0777187	0.950473	0.3529	0.7059
C17H12O7	-0.106215	0.932254	0.4118	0.7059
C17H12O7N2	0.358174	0.766799	0.4118	0.7059
C17H12O8	0.0402499	0.974369	0.4706	0.7059
C17H12O8N2	-0.132345	0.915499	0.4706	0.7059
C17H12O9	-0.161328	0.896844	0.5294	0.7059
C17H13O10N1	0.890944	0.300087	0.5882	0.7647
C17H13O4N1	0.305354	0.80245	0.2353	0.7647
C17H13O5N1	0.993418	0.0730796	0.2941	0.7647
C17H13O6N1	-0.168461	0.89224	0.3529	0.7647
C17H13O7N1	-0.0862279	0.945037	0.4118	0.7647
C17H13O8N1	0.241416	0.844777	0.4706	0.7647
C17H13O9N1	0.0360525	0.977043	0.5294	0.7647
C17H14O10	-0.907818	0.275494	0.5882	0.8235
C17H14O11	0.587408	0.600297	0.6471	0.8235
C17H14O12	0.755941	0.454359	0.7059	0.8235
C17H14O3	-0.0816874	0.947938	0.1765	0.8235
C17H14O4	-0.24289	0.843809	0.2353	0.8235
C17H14O4N2	-0.468376	0.689678	0.2353	0.8235
C17H14O5N2	0.999904	0.00881297	0.2941	0.8235
C17H14O6	0.896772	0.291811	0.3529	0.8235
C17H14O6N2	-0.61306	0.579876	0.3529	0.8235
C17H14O6S1	-0.694526	0.511228	0.3529	0.8235
C17H14O7	-0.0828239	0.947212	0.4118	0.8235
C17H14O7N2	0.0993476	0.936649	0.4118	0.8235
C17H14O7S1	-0.28253	0.817653	0.4118	0.8235
C17H14O8	-0.230948	0.851635	0.4706	0.8235
C17H14O8N2	0.168063	0.892498	0.4706	0.8235
C17H14O8S1	0.508636	0.6603	0.4706	0.8235
C17H14O9	-0.934537	0.231629	0.5294	0.8235
C17H14O9N2	0.749459	0.460627	0.5294	0.8235
C17H14O9S1	0.958446	0.184169	0.5294	0.8235
C17H15O10N1	0.417478	0.725828	0.5882	0.8824
C17H15O11N1	0.999799	0.012768	0.6471	0.8824
C17H15O4N1	0.656447	0.544117	0.2353	0.8824
C17H15O5N1	0.517721	0.653561	0.2941	0.8824
C17H15O6N1	0.184409	0.881926	0.3529	0.8824
C17H15O7N1	0.0316068	0.979875	0.4118	0.8824
C17H15O8N1	0.347901	0.773789	0.4706	0.8824
C17H15O9N1	-0.100279	0.936053	0.5294	0.8824
C17H16O10	0.393225	0.742719	0.5882	0.9412
C17H16O10N2	0.751137	0.459012	0.5882	0.9412
C17H16O10S1	0.151004	0.903499	0.5882	0.9412
C17H16O11	0.741655	0.468082	0.6471	0.9412
C17H16O12	0.978538	0.132133	0.7059	0.9412
C17H16O13	0.999987	0.00329879	0.7647	0.9412
C17H16O3	0.672442	0.530491	0.1765	0.9412
C17H16O4	-0.990112	0.0896022	0.2353	0.9412
C17H16O5N2	-0.980908	0.124598	0.2941	0.9412
C17H16O5S1	-0.638312	0.559266	0.2941	0.9412
C17H16O6	0.437743	0.711556	0.3529	0.9412
C17H16O6N2	-0.912477	0.268334	0.3529	0.9412
C17H16O6S1	-0.256455	0.834891	0.3529	0.9412
C17H16O7	-0.0466088	0.970317	0.4118	0.9412
C17H16O7N2	0.00254996	0.998377	0.4118	0.9412
C17H16O7S1	-0.074146	0.952754	0.4118	0.9412
C17H16O8	-0.96637	0.16557	0.4706	0.9412
C17H16O8N2	0.613752	0.579319	0.4706	0.9412
C17H16O8S1	-0.977379	0.135667	0.4706	0.9412
C17H16O9	-0.0107574	0.993152	0.5294	0.9412
C17H16O9N2	0.545094	0.632988	0.5294	0.9412
C17H16O9S1	0.23624	0.84817	0.5294	0.9412
C17H17O10N1	0.993952	0.0700498	0.5882	1
C17H17O11N1	-0.835825	0.369979	0.6471	1
C17H17O4N1	0.201922	0.870562	0.2353	1
C17H17O5N1	0.154886	0.900998	0.2941	1
C17H17O6N1	-0.318334	0.793753	0.3529	1
C17H17O7N1	0.152238	0.902704	0.4118	1
C17H17O7N1S1	-0.99449	0.0668617	0.4118	1
C17H17O8N1	0.0895981	0.942883	0.4706	1
C17H17O8N1S1	0.97418	0.144981	0.4706	1
C17H17O9N1	0.502231	0.665025	0.5294	1
C17H17O9N1S1	0.718881	0.489309	0.5294	1
C17H18O10	0.999989	0.00304723	0.5882	1.0588
C17H18O10N2	0.672839	0.530149	0.5882	1.0588
C17H18O10S1	0.243837	0.843188	0.5882	1.0588
C17H18O11	0.886584	0.306144	0.6471	1.0588
C17H18O12	0.618974	0.575098	0.7059	1.0588
C17H18O13	0.649118	0.550276	0.7647	1.0588
C17H18O2	0.0252578	0.983919	0.1176	1.0588
C17H18O3	0.634124	0.562722	0.1765	1.0588
C17H18O4	0.473133	0.686246	0.2353	1.0588
C17H18O5	-0.857725	0.343755	0.2941	1.0588
C17H18O5N2	-0.544104	0.633739	0.2941	1.0588
C17H18O5S1	0.990644	0.0871524	0.2941	1.0588
C17H18O6	0.502962	0.664487	0.3529	1.0588
C17H18O6N2	-0.00292518	0.998138	0.3529	1.0588
C17H18O6S1	-0.310672	0.798892	0.3529	1.0588
C17H18O7	-0.176545	0.887016	0.4118	1.0588
C17H18O7N2	0.152988	0.902221	0.4118	1.0588
C17H18O7N2S1	-0.60229	0.58851	0.4118	1.0588
C17H18O7S1	-0.50056	0.666255	0.4118	1.0588
C17H18O8	0.0837173	0.946641	0.4706	1.0588
C17H18O8N2	0.240375	0.845459	0.4706	1.0588
C17H18O8N2S1	-0.790328	0.41982	0.4706	1.0588
C17H18O8S1	-0.254524	0.836162	0.4706	1.0588
C17H18O9	-0.979603	0.1288	0.5294	1.0588
C17H18O9N2	0.2609	0.831962	0.5294	1.0588
C17H18O9N2S1	0.84422	0.360128	0.5294	1.0588
C17H18O9S1	-0.495108	0.670257	0.5294	1.0588
C17H19O10N1	0.932285	0.235623	0.5882	1.1176
C17H19O11N1	0.956449	0.188575	0.6471	1.1176
C17H19O3P1	0.00907317	0.994224	0.1765	1.1176
C17H19O4N1	0.632228	0.564281	0.2353	1.1176
C17H19O5N1	0.414328	0.728033	0.2941	1.1176
C17H19O6N1	0.145007	0.907359	0.3529	1.1176
C17H19O7N1	0.168432	0.892259	0.4118	1.1176
C17H19O7N1S1	-0.455191	0.699142	0.4118	1.1176
C17H19O8N1	0.195207	0.874924	0.4706	1.1176
C17H19O8N1S1	-0.416852	0.726267	0.4706	1.1176
C17H19O9N1	0.366099	0.761386	0.5294	1.1176
C17H19O9N1S1	-0.158057	0.898954	0.5294	1.1176
C17H20O10	0.510105	0.659213	0.5882	1.1765
C17H20O10N2	0.973404	0.147152	0.5882	1.1765
C17H20O10S1	0.199785	0.871951	0.5882	1.1765
C17H20O11	-0.989724	0.0913448	0.6471	1.1765
C17H20O11S1	-0.995063	0.0632876	0.6471	1.1765
C17H20O12	0.941468	0.218894	0.7059	1.1765
C17H20O13	0.999015	0.0282528	0.7647	1.1765
C17H20O2	0.366783	0.760919	0.1176	1.1765
C17H20O3	0.9967	0.0517371	0.1765	1.1765
C17H20O4	-0.204978	0.868575	0.2353	1.1765
C17H20O4N2	-0.662967	0.538594	0.2353	1.1765
C17H20O5	-0.500781	0.666092	0.2941	1.1765
C17H20O5N2	0.75935	0.451034	0.2941	1.1765
C17H20O5S1	0.241388	0.844795	0.2941	1.1765
C17H20O6	-0.999401	0.0220386	0.3529	1.1765
C17H20O6N2	-0.335912	0.781911	0.3529	1.1765
C17H20O6S1	-0.30761	0.800942	0.3529	1.1765
C17H20O7	0.57565	0.609498	0.4118	1.1765
C17H20O7N2	-0.163407	0.895503	0.4118	1.1765
C17H20O7N2S1	-0.568118	0.615344	0.4118	1.1765
C17H20O7S1	-0.0697041	0.955589	0.4118	1.1765
C17H20O8	-0.474885	0.68498	0.4706	1.1765
C17H20O8N2	-0.0418128	0.973373	0.4706	1.1765
C17H20O8N2S1	0.853444	0.349019	0.4706	1.1765
C17H20O8S1	-0.335577	0.782137	0.4706	1.1765
C17H20O9	0.454018	0.69998	0.5294	1.1765
C17H20O9N2	0.47705	0.683412	0.5294	1.1765
C17H20O9N2S1	-0.945198	0.211737	0.5294	1.1765
C17H20O9S1	0.803882	0.405529	0.5294	1.1765
C17H21O10N1	0.77177	0.438743	0.5882	1.2353
C17H21O11N1	0.997651	0.043645	0.6471	1.2353
C17H21O2N3	-0.479883	0.681358	0.1176	1.2353
C17H21O3N1	-0.617914	0.575956	0.1765	1.2353
C17H21O4N1	0.546083	0.632237	0.2353	1.2353
C17H21O5N1	0.400366	0.737766	0.2941	1.2353
C17H21O6N1	0.0920405	0.941322	0.3529	1.2353
C17H21O6N1S1	0.999381	0.0224058	0.3529	1.2353
C17H21O7N1	0.0510254	0.967502	0.4118	1.2353
C17H21O7N1S1	0.933519	0.233443	0.4118	1.2353
C17H21O8N1	0.0406008	0.974146	0.4706	1.2353
C17H21O8N1S1	0.245252	0.842259	0.4706	1.2353
C17H21O9N1	0.397313	0.739886	0.5294	1.2353
C17H21O9N1S1	0.996883	0.0502816	0.5294	1.2353
C17H22O10	0.513092	0.657	0.5882	1.2941
C17H22O10N2	0.689054	0.516053	0.5882	1.2941
C17H22O10S1	-0.243967	0.843102	0.5882	1.2941
C17H22O11	0.701679	0.504869	0.6471	1.2941
C17H22O11S1	0.976744	0.137565	0.6471	1.2941
C17H22O12	0.711671	0.495877	0.7059	1.2941
C17H22O2	-0.0052563	0.996654	0.1176	1.2941
C17H22O3	0.781355	0.429057	0.1765	1.2941
C17H22O4	-0.499383	0.66712	0.2353	1.2941
C17H22O4N2	0.123444	0.921212	0.2353	1.2941
C17H22O4S1	-0.0324549	0.979335	0.2353	1.2941
C17H22O5	0.507265	0.661313	0.2941	1.2941
C17H22O5N2	-0.814327	0.394213	0.2941	1.2941
C17H22O5S1	0.000264	0.999832	0.2941	1.2941
C17H22O6	-0.109481	0.930162	0.3529	1.2941
C17H22O6N2	-0.927126	0.244542	0.3529	1.2941
C17H22O6S1	0.914996	0.264386	0.3529	1.2941
C17H22O7	-0.163291	0.895578	0.4118	1.2941
C17H22O7N2	0.627027	0.568543	0.4118	1.2941
C17H22O7S1	-0.0302452	0.980742	0.4118	1.2941
C17H22O8	0.0374265	0.976168	0.4706	1.2941
C17H22O8N2	0.215658	0.861621	0.4706	1.2941
C17H22O8N2S1	0.393743	0.74236	0.4706	1.2941
C17H22O8S1	0.23219	0.850822	0.4706	1.2941
C17H22O9	0.314419	0.79638	0.5294	1.2941
C17H22O9N2	0.53821	0.638201	0.5294	1.2941
C17H22O9N2S1	0.367816	0.760211	0.5294	1.2941
C17H22O9S1	0.934725	0.231292	0.5294	1.2941
C17H23O10N1	0.532881	0.642219	0.5882	1.3529
C17H23O11N1	0.99298	0.0754794	0.6471	1.3529
C17H23O4N1	0.329718	0.786093	0.2353	1.3529
C17H23O5N1	0.876683	0.319502	0.2941	1.3529
C17H23O6N1	0.424738	0.720732	0.3529	1.3529
C17H23O6N1S1	-0.964783	0.169454	0.3529	1.3529
C17H23O7N1	0.292287	0.811168	0.4118	1.3529
C17H23O7N1S1	-0.625123	0.570098	0.4118	1.3529
C17H23O8N1	0.109152	0.930373	0.4706	1.3529
C17H23O8N1S1	-0.235932	0.848372	0.4706	1.3529
C17H23O9N1	0.364407	0.762543	0.5294	1.3529
C17H23O9N1S1	-0.0204401	0.986987	0.5294	1.3529
C17H23O9N3	0.975744	0.140504	0.5294	1.3529
C17H24O10	-0.442904	0.707896	0.5882	1.4118
C17H24O10S1	0.603957	0.587179	0.5882	1.4118
C17H24O11	0.667413	0.534803	0.6471	1.4118
C17H24O11S1	0.796137	0.413747	0.6471	1.4118
C17H24O12	0.955173	0.191337	0.7059	1.4118
C17H24O2	0.415222	0.727407	0.1176	1.4118
C17H24O3	-0.991053	0.0852216	0.1765	1.4118
C17H24O3S1	-0.223271	0.856653	0.1765	1.4118
C17H24O4	0.209885	0.865382	0.2353	1.4118
C17H24O4S1	-0.0201175	0.987192	0.2353	1.4118
C17H24O5	-0.185704	0.881087	0.2941	1.4118
C17H24O5S1	-0.450929	0.702185	0.2941	1.4118
C17H24O6	-0.651467	0.548308	0.3529	1.4118
C17H24O6N2	-0.999986	0.00331892	0.3529	1.4118
C17H24O6S1	0.207982	0.866621	0.3529	1.4118
C17H24O7	-0.951014	0.200088	0.4118	1.4118
C17H24O7N2	-0.754648	0.455616	0.4118	1.4118
C17H24O7S1	-0.0291188	0.98146	0.4118	1.4118
C17H24O8	0.420306	0.723845	0.4706	1.4118
C17H24O8N2	0.39993	0.738069	0.4706	1.4118
C17H24O8S1	0.843508	0.360972	0.4706	1.4118
C17H24O9	0.255858	0.835284	0.5294	1.4118
C17H24O9N2	0.136012	0.913143	0.5294	1.4118
C17H24O9S1	-0.698672	0.507549	0.5294	1.4118
C17H25O10N1	0.993835	0.0707243	0.5882	1.4706
C17H25O11N1	0.916398	0.262166	0.6471	1.4706
C17H25O4N1	0.352251	0.770832	0.2353	1.4706
C17H25O5N1	-0.552446	0.627389	0.2941	1.4706
C17H25O6N1	-0.131038	0.916338	0.3529	1.4706
C17H25O6N1S1	0.081915	0.947793	0.3529	1.4706
C17H25O7N1	0.173825	0.888774	0.4118	1.4706
C17H25O7N1S1	-0.608117	0.58385	0.4118	1.4706
C17H25O8N1	0.125248	0.920055	0.4706	1.4706
C17H25O8N1S1	0.600818	0.589683	0.4706	1.4706
C17H25O9N1	0.529955	0.644418	0.5294	1.4706
C17H25O9N1S1	0.578149	0.607551	0.5294	1.4706
[truncated: 2,833 more rows]

## Sheet: pCO2
MolForm	r	p	OC	HC
C10H10O1	0.543086	0.634512	0.1	1
C10H10O1N2	0.580632	0.605611	0.1	1
C10H10O2	-0.998034	0.039927	0.2	1
C10H10O2N2	-0.58995	0.598295	0.2	1
C10H10O2S1	-0.948363	0.205477	0.2	1
C10H10O3	-0.996188	0.0556072	0.3	1
C10H10O3N2	0.85059	0.35249	0.3	1
C10H10O3S1	-0.0816818	0.947942	0.3	1
C10H10O4	-0.738483	0.471085	0.4	1
C10H10O4N2	-0.656853	0.543775	0.4	1
C10H10O4N2S1	-0.888937	0.302889	0.4	1
C10H10O4S1	0.906843	0.27697	0.4	1
C10H10O5N2	-0.9153	0.263908	0.5	1
C10H10O5S1	0.960246	0.180109	0.5	1
C10H10O6	-0.999547	0.0191681	0.6	1
C10H10O6N2	-0.173297	0.889116	0.6	1
C10H10O6S1	-0.687027	0.517831	0.6	1
C10H10O7	-0.935968	0.229055	0.7	1
C10H10O7S1	0.90901	0.273679	0.7	1
C10H11O2N1	-0.894817	0.294612	0.2	1.1
C10H11O3N1	0.677028	0.526535	0.3	1.1
C10H11O3N1S1	-0.0918055	0.941472	0.3	1.1
C10H11O4N1	-0.761771	0.448661	0.4	1.1
C10H11O4N1S1	0.232582	0.850565	0.4	1.1
C10H11O5N1	-0.565889	0.617066	0.5	1.1
C10H11O5N1S1	-0.48878	0.674884	0.5	1.1
C10H11O6N1	0.349786	0.772509	0.6	1.1
C10H11O7N1	-0.222978	0.856844	0.7	1.1
C10H12O1	0.2685	0.826944	0.1	1.2
C10H12O2	-0.291375	0.811775	0.2	1.2
C10H12O2N2	-0.984102	0.113668	0.2	1.2
C10H12O2S1	-0.342418	0.777508	0.2	1.2
C10H12O3N2	-0.932753	0.234799	0.3	1.2
C10H12O3S1	0.422932	0.722002	0.3	1.2
C10H12O4	-0.718268	0.489871	0.4	1.2
C10H12O4N2	-0.964526	0.170076	0.4	1.2
C10H12O4S1	0.806253	0.402984	0.4	1.2
C10H12O5	-0.928639	0.24196	0.5	1.2
C10H12O5N2	-0.803329	0.40612	0.5	1.2
C10H12O5N2S1	-0.199792	0.871947	0.5	1.2
C10H12O5S1	0.704499	0.502344	0.5	1.2
C10H12O6	0.0567634	0.963844	0.6	1.2
C10H12O6N2	-0.227059	0.854178	0.6	1.2
C10H12O6S1	0.835303	0.370584	0.6	1.2
C10H12O7	-0.858803	0.342417	0.7	1.2
C10H12O7S1	-0.838156	0.367268	0.7	1.2
C10H13O1N1	-0.741699	0.468041	0.1	1.3
C10H13O2N1	0.0321983	0.979498	0.2	1.3
C10H13O3N1	0.969857	0.156705	0.3	1.3
C10H13O4N1	-0.318385	0.793719	0.4	1.3
C10H13O4N1S1	-0.525747	0.647572	0.4	1.3
C10H13O5N1	-0.997898	0.0412875	0.5	1.3
C10H13O5N1S1	-0.00647838	0.995876	0.5	1.3
C10H13O6N1	-0.933378	0.233692	0.6	1.3
C10H13O6N1S1	0.513648	0.656588	0.6	1.3
C10H13O7N1	-0.850097	0.353086	0.7	1.3
C10H14O1	-0.985097	0.110046	0.1	1.4
C10H14O2	-0.970414	0.155243	0.2	1.4
C10H14O2N2	-0.983636	0.115329	0.2	1.4
C10H14O3	-0.0714852	0.954452	0.3	1.4
C10H14O3N2	-0.89315	0.29698	0.3	1.4
C10H14O3S1	0.839526	0.365665	0.3	1.4
C10H14O4	-0.297264	0.807852	0.4	1.4
C10H14O4N2	-0.992328	0.0789106	0.4	1.4
C10H14O4S1	0.752508	0.457688	0.4	1.4
C10H14O5	0.36945	0.759092	0.5	1.4
C10H14O5N2	-0.826583	0.380563	0.5	1.4
C10H14O5S1	0.935085	0.230647	0.5	1.4
C10H14O6	-0.997472	0.0452751	0.6	1.4
C10H14O6S1	0.80905	0.399964	0.6	1.4
C10H14O7	0.563133	0.619192	0.7	1.4
C10H14O7S1	-0.516294	0.654623	0.7	1.4
C10H15O1N1	-0.837755	0.367735	0.1	1.5
C10H15O2N1	-0.706804	0.500272	0.2	1.5
C10H15O3N1	-0.974885	0.142981	0.3	1.5
C10H15O4N1	-0.821139	0.386677	0.4	1.5
C10H15O4N1S1	0.35194	0.771044	0.4	1.5
C10H15O5N1	-0.986028	0.106546	0.5	1.5
C10H15O5N1S1	-0.902199	0.283904	0.5	1.5
C10H15O6N1	-0.817032	0.391236	0.6	1.5
C10H15O7N1	-0.67844	0.525313	0.7	1.5
C10H15O8N1	0.236571	0.847953	0.8	1.5
C10H16O1	-0.768171	0.442334	0.1	1.6
C10H16O2	0.956356	0.188778	0.2	1.6
C10H16O3	-0.999113	0.0268106	0.3	1.6
C10H16O3S1	0.811757	0.397022	0.3	1.6
C10H16O4N2	0.522885	0.649711	0.4	1.6
C10H16O4S1	0.227715	0.853749	0.4	1.6
C10H16O5	-0.955255	0.191162	0.5	1.6
C10H16O5N2	-0.992136	0.0798939	0.5	1.6
C10H16O5S1	0.454878	0.699366	0.5	1.6
C10H16O6	-0.989291	0.0932508	0.6	1.6
C10H16O6S1	-0.0285432	0.981826	0.6	1.6
C10H16O7	-0.762094	0.448343	0.7	1.6
C10H16O7S1	-0.561242	0.620648	0.7	1.6
C10H17O10N1S1	-0.830774	0.375797	1	1.7
C10H17O3N1	-0.321379	0.791707	0.3	1.7
C10H17O4N1	-0.911966	0.269128	0.4	1.7
C10H17O5N1	-0.989757	0.0911988	0.5	1.7
C10H17O7N1	-0.970725	0.154422	0.7	1.7
C10H17O7N1S1	-0.766861	0.443636	0.7	1.7
C10H17O8N1S1	-0.905628	0.2788	0.8	1.7
C10H18O2	-0.300663	0.805584	0.2	1.8
C10H18O3	0.0640328	0.959208	0.3	1.8
C10H18O3S1	0.993128	0.0746746	0.3	1.8
C10H18O4	0.548814	0.630159	0.4	1.8
C10H18O4S1	0.838751	0.366572	0.4	1.8
C10H18O5S1	0.254338	0.836285	0.5	1.8
C10H18O6	-0.972959	0.148384	0.6	1.8
C10H18O6S1	-0.222497	0.857158	0.6	1.8
C10H18O7	0.742086	0.467673	0.7	1.8
C10H18O7S1	-0.710397	0.497031	0.7	1.8
C10H20O4	0.98	0.127538	0.4	2
C10H20O4S1	0.756437	0.453877	0.4	2
C10H20O6S1	-0.287964	0.814043	0.6	2
C10H20O9S1	-0.331498	0.784892	0.9	2
C10H6O3	-0.983553	0.115619	0.3	0.6
C10H6O4	-0.999823	0.0119673	0.4	0.6
C10H6O4S1	-0.31799	0.793984	0.4	0.6
C10H6O5	0.512304	0.657584	0.5	0.6
C10H6O5N2	-0.922024	0.25307	0.5	0.6
C10H6O6	0.0537345	0.965775	0.6	0.6
C10H6O6N2	0.28734	0.814458	0.6	0.6
C10H6O7	-0.332594	0.784152	0.7	0.6
C10H7O2N1	0.994456	0.0670646	0.2	0.7
C10H7O3N1	-0.446548	0.705306	0.3	0.7
C10H7O3N1S1	-0.916577	0.261881	0.3	0.7
C10H7O4N1	-0.278605	0.820256	0.4	0.7
C10H7O4N1S1	0.606342	0.585272	0.4	0.7
C10H7O5N1	-0.857418	0.344135	0.5	0.7
C10H7O5N1S1	-0.683819	0.520635	0.5	0.7
C10H7O6N1	-0.800673	0.40895	0.6	0.7
C10H8O1	-0.932708	0.234879	0.1	0.8
C10H8O2	-0.87944	0.315835	0.2	0.8
C10H8O2N2	-0.964002	0.171334	0.2	0.8
C10H8O2S1	0.925784	0.246812	0.2	0.8
C10H8O3	-0.999123	0.0266708	0.3	0.8
C10H8O3N2	0.346335	0.774852	0.3	0.8
C10H8O3S1	0.546819	0.631678	0.3	0.8
C10H8O4	-0.697645	0.508462	0.4	0.8
C10H8O4N2	-0.364146	0.762722	0.4	0.8
C10H8O4N2S1	0.146492	0.906403	0.4	0.8
C10H8O4S1	0.804928	0.404408	0.4	0.8
C10H8O5	0.545542	0.632648	0.5	0.8
C10H8O5N2	-0.913434	0.266841	0.5	0.8
C10H8O5S1	0.836047	0.369722	0.5	0.8
C10H8O6	-0.875612	0.320917	0.6	0.8
C10H8O6S1	0.379253	0.752362	0.6	0.8
C10H8O7	-0.979162	0.13019	0.7	0.8
C10H9O1N1	-0.848568	0.35493	0.1	0.9
C10H9O2N1	0.623801	0.571175	0.2	0.9
C10H9O2N1S1	-0.652918	0.547089	0.2	0.9
C10H9O3N1	0.350924	0.771735	0.3	0.9
C10H9O3N1S1	0.494581	0.670643	0.3	0.9
C10H9O4N1	-0.591064	0.597416	0.4	0.9
C10H9O4N1S1	-0.166459	0.893533	0.4	0.9
C10H9O5N1	-0.707063	0.500039	0.5	0.9
C10H9O5N1S1	0.590712	0.597694	0.5	0.9
C10H9O6N1	-0.76165	0.448779	0.6	0.9
C10H9O7N1	-0.605014	0.586335	0.7	0.9
C11H10O1	-0.384509	0.748742	0.0909	0.9091
C11H10O2	0.551081	0.628431	0.1818	0.9091
C11H10O2N2	-0.916736	0.261628	0.1818	0.9091
C11H10O2S1	0.589052	0.599002	0.1818	0.9091
C11H10O3	-0.708458	0.498782	0.2727	0.9091
C11H10O3N2	-0.965808	0.166956	0.2727	0.9091
C11H10O3S1	0.37638	0.754338	0.2727	0.9091
C11H10O4	0.0322202	0.979484	0.3636	0.9091
C11H10O4N2	-0.999923	0.00788183	0.3636	0.9091
C11H10O4N2S1	0.652268	0.547635	0.3636	0.9091
C11H10O4S1	0.668443	0.533922	0.3636	0.9091
C11H10O5	-0.948166	0.205872	0.4545	0.9091
C11H10O5N2	-0.884569	0.308906	0.4545	0.9091
C11H10O5N2S1	0.416072	0.726813	0.4545	0.9091
C11H10O5S1	0.585412	0.601866	0.4545	0.9091
C11H10O6	0.0590041	0.962415	0.5455	0.9091
C11H10O6N2	-0.999897	0.00913435	0.5455	0.9091
C11H10O6S1	0.949753	0.202669	0.5455	0.9091
C11H10O7	-0.332051	0.784519	0.6364	0.9091
C11H10O7S1	0.554741	0.625635	0.6364	0.9091
C11H10O8	-0.95829	0.184517	0.7273	0.9091
C11H11O2N1	-0.971529	0.152276	0.1818	1
C11H11O3N1	-0.893507	0.296474	0.2727	1
C11H11O3N1S1	0.811891	0.396877	0.2727	1
C11H11O4N1	-0.86706	0.332014	0.3636	1
C11H11O4N1S1	0.998328	0.0368152	0.3636	1
C11H11O5N1	-0.788381	0.421839	0.4545	1
C11H11O5N1S1	0.759284	0.451099	0.4545	1
C11H11O6N1	0.425498	0.720198	0.5455	1
C11H11O6N1S1	0.983108	0.11718	0.5455	1
C11H11O7N1	-0.896025	0.292885	0.6364	1
C11H11O8N1	-0.61434	0.578845	0.7273	1
C11H12O1	-0.994641	0.065936	0.0909	1.0909
C11H12O2	-0.980168	0.127	0.1818	1.0909
C11H12O2N2	0.529246	0.64495	0.1818	1.0909
C11H12O2S1	-0.609047	0.583104	0.1818	1.0909
C11H12O3	0.587618	0.600131	0.2727	1.0909
C11H12O3N2	-0.994653	0.0658641	0.2727	1.0909
C11H12O3S1	0.866564	0.332647	0.2727	1.0909
C11H12O4	0.173998	0.888663	0.3636	1.0909
C11H12O4N2	0.0796436	0.949244	0.3636	1.0909
C11H12O4N2S1	0.949898	0.202372	0.3636	1.0909
C11H12O4S1	0.673577	0.529514	0.3636	1.0909
C11H12O5	-0.954329	0.193145	0.4545	1.0909
C11H12O5N2	-0.612251	0.580529	0.4545	1.0909
C11H12O5S1	0.70207	0.504519	0.4545	1.0909
C11H12O6	-0.998775	0.0315189	0.5455	1.0909
C11H12O6N2	-0.94855	0.205101	0.5455	1.0909
C11H12O6S1	0.863883	0.336051	0.5455	1.0909
C11H12O7	-0.993291	0.0737864	0.6364	1.0909
C11H12O7S1	0.670645	0.532035	0.6364	1.0909
C11H12O8	-0.681914	0.522296	0.7273	1.0909
C11H13O1N1	0.982491	0.119306	0.0909	1.1818
C11H13O2N1	-0.927926	0.24318	0.1818	1.1818
C11H13O3N1	-0.999746	0.014345	0.2727	1.1818
C11H13O4N1	0.18914	0.87886	0.3636	1.1818
C11H13O4N1S1	0.805523	0.403769	0.3636	1.1818
C11H13O5N1	-0.990719	0.0868014	0.4545	1.1818
C11H13O5N1S1	0.676669	0.526846	0.4545	1.1818
C11H13O6N1	-0.86961	0.328741	0.5455	1.1818
C11H13O6N1S1	0.999996	0.00183394	0.5455	1.1818
C11H13O7N1	-0.967406	0.162985	0.6364	1.1818
C11H13O7N1S1	-0.928462	0.242263	0.6364	1.1818
C11H13O8N1	-0.779663	0.43078	0.7273	1.1818
C11H14O1	0.0210894	0.986573	0.0909	1.2727
C11H14O2	-0.993507	0.0725855	0.1818	1.2727
C11H14O2N2	-0.969582	0.157424	0.1818	1.2727
C11H14O2S1	-0.305064	0.802644	0.1818	1.2727
C11H14O3N2	-0.943971	0.214117	0.2727	1.2727
C11H14O3S1	0.670721	0.53197	0.2727	1.2727
C11H14O4	0.00332583	0.997883	0.3636	1.2727
C11H14O4N2	-0.971577	0.152147	0.3636	1.2727
C11H14O4N2S1	0.271295	0.825096	0.3636	1.2727
C11H14O4S1	0.998101	0.0392441	0.3636	1.2727
C11H14O5	-0.893822	0.296028	0.4545	1.2727
C11H14O5N2	-0.997569	0.044403	0.4545	1.2727
C11H14O5N2S1	0.649532	0.54993	0.4545	1.2727
C11H14O5S1	0.778554	0.431907	0.4545	1.2727
C11H14O6	-0.958724	0.183548	0.5455	1.2727
C11H14O6N2	-0.860821	0.339901	0.5455	1.2727
C11H14O6S1	-0.597324	0.592461	0.5455	1.2727
C11H14O7	-0.990393	0.0883156	0.6364	1.2727
C11H14O7S1	-0.858231	0.343128	0.6364	1.2727
C11H14O8	-0.879036	0.316375	0.7273	1.2727
C11H15O1N1	-0.715397	0.492492	0.0909	1.3636
C11H15O2N1	-0.994651	0.0658766	0.1818	1.3636
C11H15O3N1	-0.985033	0.110284	0.2727	1.3636
C11H15O4N1	-0.976299	0.13888	0.3636	1.3636
C11H15O4N1S1	0.670139	0.532469	0.3636	1.3636
C11H15O5N1	-0.912781	0.267861	0.4545	1.3636
C11H15O5N1S1	0.958457	0.184144	0.4545	1.3636
C11H15O6N1	-0.965789	0.167003	0.5455	1.3636
C11H15O6N1S1	0.982419	0.119552	0.5455	1.3636
C11H15O7N1	-0.997977	0.0405002	0.6364	1.3636
C11H15O7P1	0.969161	0.158515	0.6364	1.3636
C11H16O1	-0.870546	0.327531	0.0909	1.4545
C11H16O2	-0.799024	0.4107	0.1818	1.4545
C11H16O2N2	-0.998966	0.0289468	0.1818	1.4545
C11H16O3	0.970453	0.155141	0.2727	1.4545
C11H16O3N2	-0.668777	0.533636	0.2727	1.4545
C11H16O3S1	0.831136	0.375382	0.2727	1.4545
C11H16O4	0.0372937	0.976253	0.3636	1.4545
C11H16O4N2	-0.992779	0.0765528	0.3636	1.4545
C11H16O4S1	-0.903711	0.281664	0.3636	1.4545
C11H16O5	-0.783555	0.426809	0.4545	1.4545
C11H16O5N2	-0.474914	0.684959	0.4545	1.4545
C11H16O5S1	0.987235	0.10183	0.4545	1.4545
C11H16O5S2	0.862007	0.338415	0.4545	1.4545
C11H16O6	-0.294874	0.809445	0.5455	1.4545
C11H16O6N2	-0.945902	0.21036	0.5455	1.4545
C11H16O6S1	-0.700729	0.505716	0.5455	1.4545
C11H16O7	-0.986749	0.103754	0.6364	1.4545
C11H16O7S1	-0.857019	0.344628	0.6364	1.4545
C11H16O8	-0.880395	0.314555	0.7273	1.4545
C11H16O8S1	-0.36171	0.764386	0.7273	1.4545
C11H17O2N1	-0.993226	0.0741417	0.1818	1.5455
C11H17O3N1	-0.994463	0.0670272	0.2727	1.5455
C11H17O4N1	0.449236	0.703393	0.3636	1.5455
C11H17O5N1	-0.842688	0.361944	0.4545	1.5455
C11H17O5N1S1	-0.0594193	0.96215	0.4545	1.5455
C11H17O6N1	-0.889474	0.302142	0.5455	1.5455
C11H17O7N1	-0.888738	0.303165	0.6364	1.5455
C11H18O1	-0.795153	0.414781	0.0909	1.6364
C11H18O2	0.960352	0.179867	0.1818	1.6364
C11H18O3	0.965601	0.167463	0.2727	1.6364
C11H18O3N2	0.43921	0.710516	0.2727	1.6364
C11H18O4	0.513593	0.656628	0.3636	1.6364
C11H18O4N2	0.0285515	0.981821	0.3636	1.6364
C11H18O4S1	0.990631	0.0872136	0.3636	1.6364
C11H18O5	-0.0141708	0.990978	0.4545	1.6364
C11H18O5S1	0.995702	0.0590469	0.4545	1.6364
C11H18O6	-0.856277	0.345543	0.5455	1.6364
C11H18O6S1	0.10448	0.933364	0.5455	1.6364
C11H18O7	-0.978998	0.130705	0.6364	1.6364
C11H18O7S1	-0.883153	0.310833	0.6364	1.6364
C11H18O8	-0.982893	0.117924	0.7273	1.6364
C11H19O3N1	-0.190404	0.878041	0.2727	1.7273
C11H19O4N1	0.844468	0.359833	0.3636	1.7273
C11H19O5N1	-0.856917	0.344754	0.4545	1.7273
C11H19O6N1	-0.999511	0.0199161	0.5455	1.7273
C11H20O2	-0.243286	0.84355	0.1818	1.8182
C11H20O4	0.0323746	0.979386	0.3636	1.8182
C11H20O4S1	0.55665	0.624173	0.3636	1.8182
C11H20O5S1	0.408469	0.732125	0.4545	1.8182
C11H20O6	-0.810139	0.398783	0.5455	1.8182
C11H20O6S1	0.242362	0.844156	0.5455	1.8182
C11H20O7	0.257275	0.834351	0.6364	1.8182
C11H20O7S1	-0.681412	0.522733	0.6364	1.8182
C11H22O4	-0.582131	0.604438	0.3636	2
C11H6O4	-0.970234	0.155719	0.3636	0.5455
C11H6O5	-0.986377	0.105201	0.4545	0.5455
C11H6O6	-0.896219	0.292607	0.5455	0.5455
C11H6O6S1	-0.896707	0.291905	0.5455	0.5455
C11H6O7	-0.739457	0.470164	0.6364	0.5455
C11H7O4N1	-0.946207	0.20976	0.3636	0.6364
C11H7O5N1	-0.838842	0.366466	0.4545	0.6364
C11H7O6N1	-0.599518	0.590718	0.5455	0.6364
C11H7O7N1	-0.9771	0.136503	0.6364	0.6364
C11H8O2	-0.977909	0.134061	0.1818	0.7273
C11H8O2N2	0.895205	0.294058	0.1818	0.7273
C11H8O3	-0.977531	0.135208	0.2727	0.7273
C11H8O3N2	-0.467344	0.690422	0.2727	0.7273
C11H8O3S1	-0.588066	0.599779	0.2727	0.7273
C11H8O4	-0.934333	0.231993	0.3636	0.7273
C11H8O4N2	-0.888077	0.304082	0.3636	0.7273
C11H8O4S1	-0.495401	0.670043	0.3636	0.7273
C11H8O5	0.436201	0.712648	0.4545	0.7273
C11H8O5N2	-0.992551	0.0777515	0.4545	0.7273
C11H8O5S1	-0.333582	0.783485	0.4545	0.7273
C11H8O6	-0.995915	0.0575647	0.5455	0.7273
C11H8O6N2	-0.984929	0.110665	0.5455	0.7273
C11H8O6S1	0.128972	0.917665	0.5455	0.7273
C11H8O7	-0.970299	0.155548	0.6364	0.7273
C11H9O2N1	-0.952343	0.197333	0.1818	0.8182
C11H9O3N1	-0.955828	0.189924	0.2727	0.8182
C11H9O3N1S1	-0.748089	0.461944	0.2727	0.8182
C11H9O4N1	-0.907411	0.276112	0.3636	0.8182
C11H9O4N1S1	-0.939027	0.223459	0.3636	0.8182
C11H9O5N1	-0.830167	0.37649	0.4545	0.8182
C11H9O5N1S1	0.185098	0.88148	0.4545	0.8182
C11H9O6N1	-0.872411	0.325111	0.5455	0.8182
C11H9O7N1	-0.986291	0.105533	0.6364	0.8182
C12H10O2	0.699891	0.506464	0.1667	0.8333
C12H10O2N2	0.129028	0.917628	0.1667	0.8333
C12H10O3	-0.773721	0.436786	0.25	0.8333
C12H10O3N2	-0.674721	0.528527	0.25	0.8333
C12H10O3S1	0.625347	0.569915	0.25	0.8333
C12H10O4	-0.293466	0.810383	0.3333	0.8333
C12H10O4N2	-0.996465	0.0535474	0.3333	0.8333
C12H10O4N2S1	0.767017	0.44348	0.3333	0.8333
C12H10O4S1	0.959619	0.181534	0.3333	0.8333
C12H10O5	-0.829555	0.377189	0.4167	0.8333
C12H10O5N2	-0.912656	0.268056	0.4167	0.8333
C12H10O5N2S1	-0.992562	0.0776929	0.4167	0.8333
C12H10O5S1	0.654214	0.546	0.4167	0.8333
C12H10O6	-0.731971	0.477201	0.5	0.8333
C12H10O6N2	-0.781897	0.428504	0.5	0.8333
C12H10O6S1	0.350577	0.771971	0.5	0.8333
C12H10O7	-0.97896	0.130822	0.5833	0.8333
C12H10O7N2	0.488097	0.675383	0.5833	0.8333
C12H10O7S1	0.912607	0.268132	0.5833	0.8333
C12H10O8	-0.600613	0.589846	0.6667	0.8333
C12H11O2N1	-0.404282	0.735043	0.1667	0.9167
C12H11O3N1	-0.0126863	0.991923	0.25	0.9167
C12H11O3N1S1	0.987587	0.100413	0.25	0.9167
C12H11O4N1	-0.907534	0.275926	0.3333	0.9167
C12H11O4N1S1	-0.478351	0.682469	0.3333	0.9167
C12H11O5N1	-0.826839	0.380274	0.4167	0.9167
C12H11O5N1S1	-0.991976	0.0806993	0.4167	0.9167
C12H11O6N1	-0.99763	0.0438362	0.5	0.9167
C12H11O6N1S1	0.566105	0.616899	0.5	0.9167
C12H11O7N1	-0.610412	0.582008	0.5833	0.9167
C12H11O8N1	-0.424301	0.72104	0.6667	0.9167
C12H12O1	-0.328487	0.786922	0.0833	1
C12H12O2	-0.978127	0.133397	0.1667	1
C12H12O2N2	0.994002	0.0697607	0.1667	1
C12H12O3	-0.949211	0.203769	0.25	1
C12H12O3N2	-0.914252	0.265558	0.25	1
C12H12O3S1	-0.760877	0.449538	0.25	1
C12H12O3S2	-0.00222744	0.998582	0.25	1
C12H12O4	-0.99427	0.0681835	0.3333	1
C12H12O4N2	0.29402	0.810013	0.3333	1
C12H12O4N2S1	0.999999	0.00065	0.3333	1
C12H12O4S1	0.3428	0.777249	0.3333	1
C12H12O5	-0.788165	0.422063	0.4167	1
C12H12O5N2	-0.988763	0.0955283	0.4167	1
C12H12O5N2S1	0.0804837	0.948707	0.4167	1
C12H12O5S1	-0.945049	0.212028	0.4167	1
C12H12O6	-0.929393	0.240662	0.5	1
C12H12O6N2	-0.991831	0.0814292	0.5	1
C12H12O6S1	0.637238	0.560154	0.5	1
C12H12O7	-0.999627	0.0173826	0.5833	1
C12H12O7S1	0.530035	0.644357	0.5833	1
C12H12O8	-0.883865	0.309865	0.6667	1
C12H12O8S1	0.130379	0.916761	0.6667	1
C12H13O2N1	0.367235	0.760609	0.1667	1.0833
C12H13O3N1	0.643553	0.554919	0.25	1.0833
C12H13O4N1	-0.953149	0.195643	0.3333	1.0833
C12H13O4N1S1	0.577731	0.607876	0.3333	1.0833
C12H13O5N1	-0.887113	0.305415	0.4167	1.0833
C12H13O5N1S1	0.778515	0.431946	0.4167	1.0833
C12H13O6N1	-0.918657	0.258549	0.5	1.0833
C12H13O6N1S1	-0.162443	0.896125	0.5	1.0833
C12H13O7N1	-0.996601	0.0525072	0.5833	1.0833
C12H13O7N1S1	0.769513	0.440998	0.5833	1.0833
C12H13O8N1	-0.449441	0.703246	0.6667	1.0833
C12H14O1	0.40348	0.735601	0.0833	1.1667
C12H14O2	0.978862	0.131128	0.1667	1.1667
C12H14O2N2	-0.987593	0.100389	0.1667	1.1667
C12H14O3	-0.991325	0.0839147	0.25	1.1667
C12H14O3N2	-0.801402	0.408176	0.25	1.1667
C12H14O3S1	0.774318	0.436186	0.25	1.1667
C12H14O4N2	-0.975359	0.141618	0.3333	1.1667
C12H14O4N2S1	0.757291	0.453045	0.3333	1.1667
C12H14O4S1	0.734249	0.475069	0.3333	1.1667
C12H14O5	0.0466791	0.970272	0.4167	1.1667
C12H14O5N2	-0.988997	0.0945243	0.4167	1.1667
C12H14O5S1	-0.77372	0.436787	0.4167	1.1667
C12H14O6N2	-0.932638	0.235002	0.5	1.1667
C12H14O6N2S1	0.999992	0.00254854	0.5	1.1667
C12H14O6S1	0.624355	0.570724	0.5	1.1667
C12H14O7	-0.0832699	0.946927	0.5833	1.1667
C12H14O7S1	0.414322	0.728037	0.5833	1.1667
C12H14O8	-0.938691	0.22408	0.6667	1.1667
C12H14O8S1	0.333476	0.783557	0.6667	1.1667
C12H14O9	-0.711189	0.496314	0.75	1.1667
C12H15O1N1	-0.979824	0.128099	0.0833	1.25
C12H15O2N1	-0.994548	0.0665047	0.1667	1.25
C12H15O3N1	-0.34893	0.77309	0.25	1.25
C12H15O4N1	-0.902261	0.283812	0.3333	1.25
C12H15O4N1S1	0.381646	0.750715	0.3333	1.25
C12H15O5N1	-0.946508	0.209168	0.4167	1.25
C12H15O5N1S1	0.866315	0.332964	0.4167	1.25
C12H15O6N1	-0.785487	0.424825	0.5	1.25
C12H15O6N1S1	-0.543257	0.634382	0.5	1.25
C12H15O7N1	-0.99679	0.051024	0.5833	1.25
C12H15O7N1S1	-0.0341666	0.978245	0.5833	1.25
C12H15O8N1	-0.852139	0.350611	0.6667	1.25
C12H16O1	0.0881067	0.943837	0.0833	1.3333
C12H16O2	0.170758	0.890757	0.1667	1.3333
C12H16O2N2	-0.547047	0.631504	0.1667	1.3333
C12H16O2S1	0.557961	0.623168	0.1667	1.3333
C12H16O3	0.685376	0.519275	0.25	1.3333
C12H16O3S1	0.709372	0.497958	0.25	1.3333
C12H16O4	0.972265	0.150286	0.3333	1.3333
C12H16O4N2	-0.9628	0.17419	0.3333	1.3333
C12H16O4S1	0.843045	0.361522	0.3333	1.3333
C12H16O5	-0.823939	0.383544	0.4167	1.3333
C12H16O5N2	-0.924313	0.249278	0.4167	1.3333
C12H16O5S1	0.7625	0.447943	0.4167	1.3333
C12H16O6	-0.845289	0.358857	0.5	1.3333
C12H16O6N2	-0.970426	0.155212	0.5	1.3333
C12H16O6N2S1	-0.457065	0.697801	0.5	1.3333
C12H16O6S1	0.714359	0.493437	0.5	1.3333
C12H16O7	-0.956273	0.188959	0.5833	1.3333
C12H16O7S1	0.566552	0.616554	0.5833	1.3333
C12H16O8	-0.992857	0.076137	0.6667	1.3333
C12H16O8S1	-0.22746	0.853916	0.6667	1.3333
C12H16O9	-0.626867	0.568674	0.75	1.3333
C12H16O9S1	-0.362017	0.764176	0.75	1.3333
C12H17O2N1	-0.124223	0.920712	0.1667	1.4167
C12H17O3N1	-0.658674	0.542236	0.25	1.4167
C12H17O4N1	-0.719997	0.488286	0.3333	1.4167
C12H17O4N1S1	0.965941	0.16663	0.3333	1.4167
C12H17O5N1	-0.948602	0.204997	0.4167	1.4167
C12H17O5N1S1	0.977304	0.135893	0.4167	1.4167
C12H17O5N3	0.358513	0.766568	0.4167	1.4167
C12H17O6N1	-0.896785	0.291793	0.5	1.4167
C12H17O6N1S1	-0.586457	0.601044	0.5	1.4167
C12H17O7N1	-0.994069	0.0693731	0.5833	1.4167
C12H17O8N1	-0.541378	0.635805	0.6667	1.4167
C12H18O1	-0.610348	0.582059	0.0833	1.5
C12H18O2	-0.715963	0.491976	0.1667	1.5
C12H18O2N2	-0.999992	0.00260425	0.1667	1.5
C12H18O3	-0.947913	0.206377	0.25	1.5
C12H18O3N2	-0.8935	0.296484	0.25	1.5
C12H18O3S1	0.834243	0.37181	0.25	1.5
C12H18O4	-0.722178	0.486282	0.3333	1.5
C12H18O4N2	-0.99201	0.0805276	0.3333	1.5
C12H18O4S1	-0.832093	0.374285	0.3333	1.5
C12H18O5	0.0447992	0.97147	0.4167	1.5
C12H18O5N2	-0.844135	0.360229	0.4167	1.5
C12H18O5S1	0.7531	0.457116	0.4167	1.5
C12H18O6	0.977504	0.135289	0.5	1.5
C12H18O6N2	-0.999942	0.00687066	0.5	1.5
C12H18O6S1	0.713467	0.494248	0.5	1.5
C12H18O7	-0.954371	0.193056	0.5833	1.5
C12H18O7S1	-0.27201	0.824624	0.5833	1.5
C12H18O8	-0.992197	0.0795803	0.6667	1.5
C12H18O8S1	0.135583	0.913419	0.6667	1.5
C12H18O9	-0.739501	0.470123	0.75	1.5
C12H18O9S1	-0.464592	0.692402	0.75	1.5
C12H19O3N1	-1	0.00033	0.25	1.5833
C12H19O4N1	-0.672209	0.530691	0.3333	1.5833
C12H19O5N1	0.480057	0.681232	0.4167	1.5833
C12H19O5N1S1	-0.599926	0.590393	0.4167	1.5833
C12H19O5N3	-0.755749	0.454546	0.4167	1.5833
C12H19O6N1	-0.858157	0.34322	0.5	1.5833
C12H19O6N1S1	-0.691482	0.513916	0.5	1.5833
C12H19O7N1	-0.966633	0.164919	0.5833	1.5833
C12H19O8N1	-0.677081	0.526489	0.6667	1.5833
C12H20O1	-0.963128	0.173416	0.0833	1.6667
C12H20O4N2	-0.999781	0.0133161	0.3333	1.6667
C12H20O4S1	0.843687	0.360761	0.3333	1.6667
C12H20O5N2	-0.0145224	0.990754	0.4167	1.6667
C12H20O5S1	0.829837	0.376867	0.4167	1.6667
C12H20O6	-0.803468	0.405971	0.5	1.6667
C12H20O6N2	-0.990518	0.0877401	0.5	1.6667
C12H20O6S1	0.631713	0.564704	0.5	1.6667
C12H20O7	0.295638	0.808935	0.5833	1.6667
C12H20O7S1	-0.460791	0.695132	0.5833	1.6667
C12H20O8	-0.970058	0.156179	0.6667	1.6667
C12H20O8S1	0.517909	0.653421	0.6667	1.6667
C12H20O9S1	-0.713364	0.494341	0.75	1.6667
C12H21O4N1	-0.976547	0.138149	0.3333	1.75
C12H21O5N1	-0.373579	0.756261	0.4167	1.75
C12H21O6N1	-0.985954	0.106827	0.5	1.75
C12H22O2	0.909099	0.273543	0.1667	1.8333
C12H22O4	-0.693433	0.512194	0.3333	1.8333
C12H22O4S1	0.954183	0.193456	0.3333	1.8333
C12H22O5	-0.9343	0.232052	0.4167	1.8333
C12H22O5S1	0.806412	0.402813	0.4167	1.8333
C12H22O6	0.994983	0.0637938	0.5	1.8333
C12H22O6S1	0.67977	0.524159	0.5	1.8333
C12H22O7	0.134525	0.914099	0.5833	1.8333
C12H22O7S1	-0.954229	0.193357	0.5833	1.8333
C12H22O8	0.555264	0.625234	0.6667	1.8333
C12H22O9	0.991104	0.0849778	0.75	1.8333
C12H23O6N1S1	0.0398218	0.974642	0.5	1.9167
C12H24O10S1	-0.367154	0.760664	0.8333	2
C12H24O6	0.537265	0.638915	0.5	2
C12H26O4S1	0.863281	0.336811	0.3333	2.1667
C12H27O2N2S2P1	-0.95965	0.181463	0.1667	2.25
C12H6O5	-0.479912	0.681337	0.4167	0.5
C12H6O5N2	-0.8339	0.372206	0.4167	0.5
C12H6O6	-0.917056	0.261118	0.5	0.5
C12H7O3N1	0.943741	0.214561	0.25	0.5833
C12H7O4N1	-0.872755	0.324663	0.3333	0.5833
C12H7O5N1	-0.723033	0.485495	0.4167	0.5833
C12H7O6N1	-0.982924	0.117817	0.5	0.5833
C12H7O7N1	-0.694626	0.51114	0.5833	0.5833
C12H8O2N2	-0.859199	0.341925	0.1667	0.6667
C12H8O3	-0.945948	0.210271	0.25	0.6667
C12H8O3N2	-0.825347	0.381958	0.25	0.6667
C12H8O4	0.660287	0.540869	0.3333	0.6667
C12H8O4N2	0.232039	0.850921	0.3333	0.6667
C12H8O4S1	0.643204	0.555209	0.3333	0.6667
C12H8O5	0.424295	0.721044	0.4167	0.6667
C12H8O5N2	-0.975647	0.140785	0.4167	0.6667
C12H8O5S1	-0.338266	0.780319	0.4167	0.6667
C12H8O6	-0.766723	0.443772	0.5	0.6667
C12H8O6N2	-0.798538	0.411215	0.5	0.6667
C12H8O6S1	-0.990232	0.089052	0.5	0.6667
C12H8O7	-0.926656	0.24534	0.5833	0.6667
C12H8O8	-0.954293	0.193222	0.6667	0.6667
C12H9O2N1	-0.614029	0.579096	0.1667	0.75
C12H9O3N1	-0.826399	0.380772	0.25	0.75
C12H9O3N1S1	-0.999637	0.017145	0.25	0.75
C12H9O4N1	-0.995485	0.0605202	0.3333	0.75
C12H9O4N1S1	-0.793186	0.416841	0.3333	0.75
C12H9O5N1	-0.999958	0.00582018	0.4167	0.75
C12H9O5N1S1	-0.110904	0.929251	0.4167	0.75
C12H9O6N1	-0.969215	0.158375	0.5	0.75
C12H9O6N1S1	-0.914245	0.265569	0.5	0.75
C12H9O7N1	-0.981774	0.12173	0.5833	0.75
C12H9O8N1	-0.961433	0.177382	0.6667	0.75
C13H10O1	-0.246012	0.84176	0.0769	0.7692
C13H10O2N2	-0.572288	0.612112	0.1538	0.7692
C13H10O3	-0.294628	0.809609	0.2308	0.7692
C13H10O3N2	-0.120365	0.923187	0.2308	0.7692
C13H10O3N2S1	0.126551	0.919218	0.2308	0.7692
C13H10O4	-0.679896	0.52405	0.3077	0.7692
C13H10O4N2	-0.429669	0.717261	0.3077	0.7692
C13H10O4S1	0.201443	0.870874	0.3077	0.7692
C13H10O5	-0.812006	0.396751	0.3846	0.7692
C13H10O5N2	-0.993144	0.0745908	0.3846	0.7692
C13H10O5N2S1	-0.933678	0.23316	0.3846	0.7692
C13H10O5S1	0.76938	0.441131	0.3846	0.7692
C13H10O6	-0.0498956	0.968222	0.4615	0.7692
C13H10O6N2	-0.909729	0.272578	0.4615	0.7692
C13H10O6S1	-0.014124	0.991008	0.4615	0.7692
C13H10O7	-0.966204	0.165981	0.5385	0.7692
C13H10O7N2	-0.999655	0.0167151	0.5385	0.7692
C13H10O7S1	-0.996486	0.0533842	0.5385	0.7692
C13H10O8	-0.872818	0.32458	0.6154	0.7692
C13H10O8N2	-0.550047	0.62922	0.6154	0.7692
C13H10O9	-0.995354	0.0613883	0.6923	0.7692
C13H11O2N1	-0.604829	0.586483	0.1538	0.8462
C13H11O3N1	-0.95475	0.192246	0.2308	0.8462
C13H11O4N1	-0.486085	0.676849	0.3077	0.8462
C13H11O4N1S1	0.949079	0.204036	0.3077	0.8462
C13H11O5N1	-0.875534	0.32102	0.3846	0.8462
C13H11O5N1S1	-0.725424	0.483288	0.3846	0.8462
C13H11O6N1	-0.968519	0.160163	0.4615	0.8462
C13H11O6N1S1	-0.831269	0.375229	0.4615	0.8462
C13H11O7N1	-0.930349	0.239008	0.5385	0.8462
C13H11O7N1S1	-0.689887	0.51532	0.5385	0.8462
C13H11O8N1	-0.994533	0.0666006	0.6154	0.8462
C13H12O2N2	-0.967972	0.161556	0.1538	0.9231
C13H12O3	0.978265	0.132974	0.2308	0.9231
C13H12O3N2	0.291902	0.811424	0.2308	0.9231
C13H12O3S1	0.742713	0.467078	0.2308	0.9231
C13H12O4	0.0848752	0.945902	0.3077	0.9231
C13H12O4N2	-0.913128	0.267319	0.3077	0.9231
C13H12O4S1	0.719362	0.488868	0.3077	0.9231
C13H12O5	-0.736639	0.472824	0.3846	0.9231
C13H12O5N2	-0.933153	0.234091	0.3846	0.9231
C13H12O5S1	0.792252	0.417817	0.3846	0.9231
C13H12O6	0.0807114	0.948562	0.4615	0.9231
C13H12O6N2	-0.974648	0.143657	0.4615	0.9231
C13H12O6N2S1	-0.921048	0.25467	0.4615	0.9231
C13H12O6S1	0.851933	0.350861	0.4615	0.9231
C13H12O7	-0.753026	0.457187	0.5385	0.9231
C13H12O7N2	-0.968337	0.160629	0.5385	0.9231
C13H12O7S1	0.120213	0.923284	0.5385	0.9231
C13H12O8	-0.0753922	0.951958	0.6154	0.9231
C13H12O8S1	-0.823942	0.38354	0.6154	0.9231
C13H12O9	-0.766462	0.444031	0.6923	0.9231
C13H12O9S1	0.758074	0.452281	0.6923	0.9231
C13H13O2N1	0.708026	0.499172	0.1538	1
C13H13O3N1	-0.76818	0.442325	0.2308	1
C13H13O4N1	-0.891155	0.299791	0.3077	1
C13H13O4N1S1	-0.999388	0.0222752	0.3077	1
C13H13O5N1	-0.702516	0.50412	0.3846	1
C13H13O5N1S1	-0.763433	0.447024	0.3846	1
C13H13O6N1	-0.881204	0.313467	0.4615	1
C13H13O6N1S1	0.967652	0.162368	0.4615	1
C13H13O7N1	-0.989513	0.0922801	0.5385	1
C13H13O7N1S1	-0.343381	0.776856	0.5385	1
C13H13O8N1	-0.725649	0.483079	0.6154	1
C13H13O9N1	0.677321	0.526282	0.6923	1
C13H14O1	0.751597	0.458567	0.0769	1.0769
C13H14O10	-0.794056	0.415931	0.7692	1.0769
C13H14O2	0.19092	0.877706	0.1538	1.0769
C13H14O2N2	-0.63253	0.564033	0.1538	1.0769
C13H14O3	-0.253266	0.83699	0.2308	1.0769
C13H14O3N2	-0.678759	0.525037	0.2308	1.0769
C13H14O3S1	0.757875	0.452475	0.2308	1.0769
C13H14O4	-0.96927	0.158232	0.3077	1.0769
C13H14O4N2	-0.925158	0.247864	0.3077	1.0769
C13H14O4N2S1	-0.797106	0.412727	0.3077	1.0769
C13H14O4S1	0.999184	0.0257161	0.3077	1.0769
C13H14O5	0.175182	0.887897	0.3846	1.0769
C13H14O5N2	-0.94247	0.216993	0.3846	1.0769
C13H14O5N2S1	0.901753	0.284561	0.3846	1.0769
C13H14O5S1	0.763518	0.446941	0.3846	1.0769
C13H14O6	-0.867426	0.331546	0.4615	1.0769
C13H14O6N2	0.409133	0.731662	0.4615	1.0769
C13H14O6N2S1	-0.99926	0.0244977	0.4615	1.0769
C13H14O6S1	-0.666129	0.5359	0.4615	1.0769
C13H14O7	0.527809	0.646027	0.5385	1.0769
C13H14O7N2	-0.983786	0.114795	0.5385	1.0769
C13H14O7S1	0.45681	0.697984	0.5385	1.0769
C13H14O8	0.56712	0.616115	0.6154	1.0769
C13H14O8N2	-0.910242	0.271792	0.6154	1.0769
C13H14O8S1	-0.239434	0.846076	0.6154	1.0769
C13H14O9	-0.801835	0.407714	0.6923	1.0769
C13H14O9S1	-0.758873	0.451501	0.6923	1.0769
C13H15O2N1	-0.15301	0.902207	0.1538	1.1538
C13H15O3N1	0.665781	0.536197	0.2308	1.1538
C13H15O4N1	-0.729565	0.479445	0.3077	1.1538
C13H15O4N1S1	0.812696	0.395998	0.3077	1.1538
C13H15O5N1	-0.0059908	0.996186	0.3846	1.1538
C13H15O5N1S1	0.960248	0.180104	0.3846	1.1538
C13H15O6N1	-0.871336	0.326508	0.4615	1.1538
C13H15O6N1S1	0.0044968	0.997137	0.4615	1.1538
C13H15O7N1	-0.946876	0.208441	0.5385	1.1538
C13H15O7N1S1	0.610492	0.581943	0.5385	1.1538
C13H15O8N1	-0.890868	0.300195	0.6154	1.1538
C13H15O8N1S1	-0.838479	0.366891	0.6154	1.1538
C13H15O9N1	-0.98778	0.099627	0.6923	1.1538
C13H16O1	-0.282347	0.817774	0.0769	1.2308
C13H16O1N2	-0.594513	0.594689	0.0769	1.2308
C13H16O2	0.208753	0.866119	0.1538	1.2308
C13H16O2N2	-0.938086	0.225193	0.1538	1.2308
C13H16O3	0.981592	0.122338	0.2308	1.2308
C13H16O3N2	-0.999577	0.0185279	0.2308	1.2308
C13H16O3S1	-0.794613	0.415348	0.2308	1.2308
C13H16O4	-0.955908	0.189751	0.3077	1.2308
C13H16O4N2	-0.909171	0.273433	0.3077	1.2308
C13H16O4S1	0.742527	0.467254	0.3077	1.2308
C13H16O5	-0.611622	0.581035	0.3846	1.2308
C13H16O5N2	-0.966892	0.164273	0.3846	1.2308
C13H16O5S1	0.774059	0.436447	0.3846	1.2308
C13H16O6	-0.735097	0.474273	0.4615	1.2308
C13H16O6N2	-0.873586	0.323577	0.4615	1.2308
C13H16O6S1	0.640333	0.557593	0.4615	1.2308
C13H16O7	-0.909061	0.273601	0.5385	1.2308
C13H16O7N2S1	-0.584682	0.602439	0.5385	1.2308
C13H16O7S1	0.574218	0.610612	0.5385	1.2308
C13H16O8	0.422858	0.722054	0.6154	1.2308
C13H16O8S1	0.325611	0.78886	0.6154	1.2308
C13H16O9	-0.898852	0.288805	0.6923	1.2308
C13H16O9S1	0.406045	0.733815	0.6923	1.2308
C13H17O2N1	-0.998744	0.0319148	0.1538	1.3077
C13H17O3N1	0.473917	0.685679	0.2308	1.3077
C13H17O4N1	-0.591404	0.597148	0.3077	1.3077
C13H17O4N1S1	-0.364587	0.762421	0.3077	1.3077
C13H17O5N1	-0.719619	0.488633	0.3846	1.3077
C13H17O5N1S1	0.0400214	0.974515	0.3846	1.3077
C13H17O6N1	-0.8816	0.312933	0.4615	1.3077
C13H17O6N1S1	0.568318	0.615189	0.4615	1.3077
C13H17O7N1	-0.962349	0.175248	0.5385	1.3077
C13H17O7N1S1	-0.0792989	0.949464	0.5385	1.3077
C13H17O8N1	-0.993858	0.0705973	0.6154	1.3077
C13H17O8N1S1	0.395148	0.741387	0.6154	1.3077
C13H17O9N1	-0.480676	0.680783	0.6923	1.3077
C13H18O1	0.981779	0.121716	0.0769	1.3846
C13H18O10	-0.851483	0.351407	0.7692	1.3846
C13H18O2	0.187949	0.879632	0.1538	1.3846
C13H18O2N2	0.99248	0.0781249	0.1538	1.3846
C13H18O3	0.4386	0.710949	0.2308	1.3846
C13H18O3N2	-0.860206	0.34067	0.2308	1.3846
C13H18O3S1	0.797612	0.412193	0.2308	1.3846
C13H18O4	-0.189885	0.878377	0.3077	1.3846
C13H18O4N2	-0.88468	0.308754	0.3077	1.3846
C13H18O4S1	0.796274	0.413602	0.3077	1.3846
C13H18O5	-0.847194	0.35658	0.3846	1.3846
C13H18O5N2	-0.882224	0.312091	0.3846	1.3846
C13H18O5S1	-0.713109	0.494573	0.3846	1.3846
C13H18O6	-0.790348	0.419799	0.4615	1.3846
C13H18O6N2	-0.951719	0.198631	0.4615	1.3846
C13H18O6S1	-0.841772	0.363025	0.4615	1.3846
C13H18O7	-0.93974	0.222134	0.5385	1.3846
C13H18O7S1	0.822159	0.385539	0.5385	1.3846
C13H18O7S2	0.955336	0.190986	0.5385	1.3846
C13H18O8	-0.979895	0.127872	0.6154	1.3846
C13H18O8S1	-0.149052	0.904756	0.6154	1.3846
C13H18O9	-0.924833	0.24841	0.6923	1.3846
C13H18O9S1	-0.283794	0.816814	0.6923	1.3846
C13H19O2N1	-0.912388	0.268473	0.1538	1.4615
C13H19O3N1	-0.0889108	0.943323	0.2308	1.4615
C13H19O4N1	-0.611027	0.581513	0.3077	1.4615
C13H19O5N1	-0.726841	0.481975	0.3846	1.4615
C13H19O5N1S1	-0.817567	0.390645	0.3846	1.4615
C13H19O5N3	-0.875186	0.321478	0.3846	1.4615
C13H19O6N1	-0.812413	0.396307	0.4615	1.4615
C13H19O6N1S1	0.583733	0.603183	0.4615	1.4615
C13H19O7N1	-0.965214	0.168408	0.5385	1.4615
C13H19O7N1S1	0.858714	0.342527	0.5385	1.4615
C13H19O8N1	-0.874456	0.322437	0.6154	1.4615
C13H19O9N1	-0.410035	0.731033	0.6923	1.4615
C13H20O1	-0.691364	0.51402	0.0769	1.5385
C13H20O3N2	0.922857	0.251695	0.2308	1.5385
C13H20O4N2	0.368749	0.759572	0.3077	1.5385
C13H20O4S1	0.803044	0.406425	0.3077	1.5385
C13H20O5	-0.832543	0.373768	0.3846	1.5385
C13H20O5N2	-0.904251	0.280861	0.3846	1.5385
C13H20O5S1	0.858436	0.342874	0.3846	1.5385
C13H20O6	-0.840775	0.364199	0.4615	1.5385
C13H20O6N2	-0.997026	0.0491071	0.4615	1.5385
C13H20O6S1	0.857587	0.343925	0.4615	1.5385
C13H20O7	-0.806414	0.402811	0.5385	1.5385
C13H20O7S1	-0.361761	0.764351	0.5385	1.5385
C13H20O8	0.290089	0.81263	0.6154	1.5385
C13H20O8S1	-0.478819	0.68213	0.6154	1.5385
C13H20O9	-0.977195	0.136219	0.6923	1.5385
C13H20O9S1	-0.94908	0.204032	0.6923	1.5385
C13H21O4N1	-0.996164	0.0557759	0.3077	1.6154
C13H21O5N1	-0.912811	0.267815	0.3846	1.6154
C13H21O5N3	-0.710574	0.49687	0.3846	1.6154
C13H21O6N1	-0.860159	0.340728	0.4615	1.6154
C13H21O6N1S1	-0.36963	0.758969	0.4615	1.6154
C13H21O7N1	-0.990127	0.0895302	0.5385	1.6154
C13H21O8N1	-0.956655	0.188124	0.6154	1.6154
C13H22O4	0.830456	0.37616	0.3077	1.6923
C13H22O4N2	0.333417	0.783597	0.3077	1.6923
C13H22O4S1	0.905627	0.278801	0.3077	1.6923
C13H22O5N2	-0.98573	0.107676	0.3846	1.6923
C13H22O5S1	0.696646	0.509349	0.3846	1.6923
C13H22O6	-0.913771	0.266313	0.4615	1.6923
C13H22O6N2	-0.638677	0.558964	0.4615	1.6923
C13H22O6S1	0.604904	0.586423	0.4615	1.6923
C13H22O7	0.981331	0.123206	0.5385	1.6923
C13H22O7S1	-0.236217	0.848185	0.5385	1.6923
C13H22O8	-0.9815	0.122645	0.6154	1.6923
C13H22O8S1	-0.855142	0.34694	0.6154	1.6923
C13H22O9S1	-0.166034	0.893808	0.6923	1.6923
C13H23O6N1	-0.882768	0.311354	0.4615	1.7692
C13H24O4	0.89045	0.300779	0.3077	1.8462
C13H24O5	0.866945	0.33216	0.3846	1.8462
C13H24O5S1	0.786773	0.423501	0.3846	1.8462
C13H24O6	-0.999969	0.00499048	0.4615	1.8462
C13H24O6S1	0.36921	0.759257	0.4615	1.8462
C13H24O7	-0.188961	0.878976	0.5385	1.8462
C13H6O5	-0.604239	0.586955	0.3846	0.4615
C13H6O7	0.966842	0.164398	0.5385	0.4615
C13H7O4N1	-0.968613	0.159922	0.3077	0.5385
C13H7O5N1	-0.888279	0.303802	0.3846	0.5385
C13H7O6N1	-0.919699	0.256865	0.4615	0.5385
C13H8O2	0.950644	0.200849	0.1538	0.6154
C13H8O3	-0.948179	0.205846	0.2308	0.6154
C13H8O4	-0.99542	0.0609506	0.3077	0.6154
C13H8O4N2	-0.346713	0.774596	0.3077	0.6154
C13H8O4S1	-0.458315	0.696906	0.3077	0.6154
C13H8O5	-0.924672	0.248679	0.3846	0.6154
C13H8O5N2	-0.923872	0.250013	0.3846	0.6154
C13H8O5S1	-0.877659	0.318209	0.3846	0.6154
C13H8O6	-0.997159	0.0480018	0.4615	0.6154
C13H8O6N2	-0.895565	0.293543	0.4615	0.6154
C13H8O6S1	-0.29381	0.810153	0.4615	0.6154
C13H8O7	-0.88478	0.308617	0.5385	0.6154
C13H8O8	-0.938926	0.223645	0.6154	0.6154
C13H9O2N1	0.83798	0.367473	0.1538	0.6923
C13H9O3N1	-0.990238	0.089025	0.2308	0.6923
C13H9O4N1	-0.804204	0.405184	0.3077	0.6923
C13H9O4N1S1	0.83703	0.36858	0.3077	0.6923
C13H9O5N1	-0.834922	0.371025	0.3846	0.6923
C13H9O5N1S1	-0.994576	0.0663339	0.3846	0.6923
C13H9O6N1	-0.94969	0.202797	0.4615	0.6923
C13H9O6N1S1	-0.952738	0.196506	0.4615	0.6923
C13H9O7N1	-0.896621	0.292029	0.5385	0.6923
C13H9O8N1	-0.980088	0.127254	0.6154	0.6923
C14H10O10	-0.997132	0.048231	0.7143	0.7143
C14H10O2	-0.592765	0.596072	0.1429	0.7143
C14H10O3	-0.575403	0.60969	0.2143	0.7143
C14H10O3N2	0.983271	0.116609	0.2143	0.7143
C14H10O4	-0.873281	0.323976	0.2857	0.7143
C14H10O4N2	-0.922636	0.25206	0.2857	0.7143
C14H10O4S1	0.989249	0.0934336	0.2857	0.7143
C14H10O5	-0.952875	0.196219	0.3571	0.7143
C14H10O5N2	-0.972263	0.150291	0.3571	0.7143
C14H10O5S1	0.471375	0.687516	0.3571	0.7143
C14H10O6	0.964104	0.17109	0.4286	0.7143
C14H10O6N2	-0.29196	0.811385	0.4286	0.7143
C14H10O6S1	0.256046	0.83516	0.4286	0.7143
C14H10O7	0.416714	0.726363	0.5	0.7143
C14H10O7N2	-0.816035	0.392336	0.5	0.7143
C14H10O7S1	-0.974991	0.142675	0.5	0.7143
C14H10O8	-0.699117	0.507154	0.5714	0.7143
C14H10O8N2	-0.933528	0.233427	0.5714	0.7143
C14H10O9	-0.804295	0.405086	0.6429	0.7143
C14H11O14P1	-0.0130851	0.991669	1	0.7857
C14H11O2N1	-0.992074	0.0802077	0.1429	0.7857
C14H11O3N1	-0.94376	0.214523	0.2143	0.7857
C14H11O4N1	0.284059	0.816638	0.2857	0.7857
C14H11O4N1S1	0.520015	0.651853	0.2857	0.7857
C14H11O5N1	-0.860654	0.34011	0.3571	0.7857
C14H11O5N1S1	-0.90621	0.277925	0.3571	0.7857
C14H11O6N1	-0.845435	0.358683	0.4286	0.7857
C14H11O6N1S1	-0.797098	0.412735	0.4286	0.7857
C14H11O7N1	-0.741749	0.467994	0.5	0.7857
C14H11O7N1S1	0.998307	0.0370477	0.5	0.7857
C14H11O8N1	-0.552758	0.627151	0.5714	0.7857
C14H11O9N1	-0.983771	0.11485	0.6429	0.7857
C14H12O1	-0.500331	0.666424	0.0714	0.8571
C14H12O10	-0.999944	0.00671509	0.7143	0.8571
C14H12O2	-0.765089	0.44539	0.1429	0.8571
C14H12O2N2	-0.993504	0.0726033	0.1429	0.8571
C14H12O3	0.21701	0.860739	0.2143	0.8571
C14H12O3N2	-0.999674	0.0162509	0.2143	0.8571
C14H12O4	-0.959499	0.181805	0.2857	0.8571
C14H12O4N2	-0.605526	0.585926	0.2857	0.8571
C14H12O4S1	0.906404	0.277633	0.2857	0.8571
C14H12O5	-0.737841	0.47169	0.3571	0.8571
C14H12O5N2	-0.875811	0.320654	0.3571	0.8571
C14H12O5S1	0.483457	0.678762	0.3571	0.8571
C14H12O6	-0.674841	0.528425	0.4286	0.8571
C14H12O6N2	-0.875094	0.321599	0.4286	0.8571
C14H12O6N2S1	-0.36729	0.760572	0.4286	0.8571
C14H12O6S1	0.777451	0.433024	0.4286	0.8571
C14H12O7	0.296023	0.808679	0.5	0.8571
C14H12O7N2	-0.829142	0.377659	0.5	0.8571
C14H12O7S1	0.999908	0.00865127	0.5	0.8571
C14H12O8	-0.928287	0.242563	0.5714	0.8571
C14H12O8N2	-0.981976	0.121052	0.5714	0.8571
C14H12O8S1	0.320052	0.792599	0.5714	0.8571
C14H12O9	-0.859939	0.341003	0.6429	0.8571
C14H13O2N1	-0.999713	0.0152397	0.1429	0.9286
C14H13O3N1	-0.581663	0.604804	0.2143	0.9286
C14H13O4N1	0.987262	0.101719	0.2857	0.9286
C14H13O4N1S1	0.157937	0.899031	0.2857	0.9286
C14H13O5N1	-0.668562	0.53382	0.3571	0.9286
C14H13O5N1S1	0.707998	0.499197	0.3571	0.9286
C14H13O6N1	-0.863214	0.336896	0.4286	0.9286
C14H13O6N1S1	0.201655	0.870736	0.4286	0.9286
C14H13O7N1	-0.79769	0.41211	0.5	0.9286
C14H13O7N1S1	-0.752464	0.457731	0.5	0.9286
C14H13O8N1	-0.979586	0.128853	0.5714	0.9286
C14H13O8N1S1	0.965747	0.167106	0.5714	0.9286
C14H13O9N1	-0.397823	0.739531	0.6429	0.9286
C14H14O10	-0.959298	0.182258	0.7143	1
C14H14O2	0.367128	0.760682	0.1429	1
C14H14O2N2	-0.587048	0.60058	0.1429	1
C14H14O3	0.134726	0.913969	0.2143	1
C14H14O3N2	-0.40767	0.732682	0.2143	1
C14H14O3S1	-0.710512	0.496927	0.2143	1
C14H14O4	0.600752	0.589736	0.2857	1
C14H14O4N2	-0.964364	0.170466	0.2857	1
C14H14O4S1	0.716288	0.491679	0.2857	1
C14H14O5	0.125721	0.919751	0.3571	1
C14H14O5N2	-0.885349	0.307838	0.3571	1
C14H14O5S1	0.892497	0.297903	0.3571	1
C14H14O6	-0.798809	0.410927	0.4286	1
C14H14O6N2	-0.77299	0.43752	0.4286	1
C14H14O6N2S1	0.885031	0.308274	0.4286	1
C14H14O6S1	0.995591	0.0598027	0.4286	1
C14H14O7	-0.668546	0.533834	0.5	1
C14H14O7N2	-0.981148	0.123811	0.5	1
C14H14O7N2S1	-0.562493	0.619684	0.5	1
C14H14O7S1	0.581451	0.60497	0.5	1
C14H14O8	-0.962275	0.175422	0.5714	1
C14H14O8N2	-0.950371	0.201408	0.5714	1
C14H14O8S1	0.631361	0.564993	0.5714	1
C14H14O9	-0.952359	0.1973	0.6429	1
C14H14O9N2	-0.985771	0.107521	0.6429	1
C14H14O9S1	-0.934203	0.232225	0.6429	1
C14H15O2N1	-0.56498	0.617768	0.1429	1.0714
C14H15O3N1	-0.393744	0.74236	0.2143	1.0714
C14H15O3N3S1	0.973249	0.147582	0.2143	1.0714
C14H15O4N1	-0.995075	0.0632081	0.2857	1.0714
C14H15O4N1S1	0.990889	0.0860011	0.2857	1.0714
C14H15O5N1	-0.942032	0.217826	0.3571	1.0714
C14H15O5N1S1	0.91589	0.262973	0.3571	1.0714
C14H15O6N1	-0.867931	0.330899	0.4286	1.0714
C14H15O6N1S1	-0.273062	0.823927	0.4286	1.0714
C14H15O7N1	-0.971173	0.153229	0.5	1.0714
C14H15O7N1S1	0.497063	0.668823	0.5	1.0714
C14H15O8N1	-0.998998	0.0285049	0.5714	1.0714
C14H15O8N1S1	-0.399442	0.738408	0.5714	1.0714
C14H15O9N1	-0.983126	0.117116	0.6429	1.0714
C14H16O1	-0.871571	0.326203	0.0714	1.1429
C14H16O10	-0.0749525	0.952239	0.7143	1.1429
C14H16O11	-0.241782	0.844536	0.7857	1.1429
C14H16O2	0.307643	0.80092	0.1429	1.1429
C14H16O2N2	-0.876867	0.319259	0.1429	1.1429
C14H16O3	-0.982027	0.120881	0.2143	1.1429
C14H16O3N2	0.572124	0.61224	0.2143	1.1429
C14H16O3S1	0.981817	0.121588	0.2143	1.1429
C14H16O4	-0.77031	0.440203	0.2857	1.1429
C14H16O4N2	-0.89552	0.293608	0.2857	1.1429
C14H16O4N2S1	0.533156	0.642012	0.2857	1.1429
C14H16O4S1	0.739142	0.470463	0.2857	1.1429
C14H16O5	-0.698261	0.507915	0.3571	1.1429
C14H16O5N2	-0.0636646	0.959442	0.3571	1.1429
C14H16O5N2S1	0.991742	0.0818702	0.3571	1.1429
C14H16O5S1	0.813941	0.394636	0.3571	1.1429
C14H16O6	0.0867294	0.944717	0.4286	1.1429
C14H16O6N2	-0.861079	0.339579	0.4286	1.1429
C14H16O6N2S1	-0.0347322	0.977884	0.4286	1.1429
C14H16O6S1	0.646334	0.552603	0.4286	1.1429
C14H16O7	0.104698	0.933225	0.5	1.1429
C14H16O7N2	-0.875248	0.321396	0.5	1.1429
C14H16O7N2S1	0.883517	0.310338	0.5	1.1429
C14H16O7S1	0.593013	0.595877	0.5	1.1429
C14H16O8	0.530834	0.643758	0.5714	1.1429
C14H16O8N2	-0.959411	0.182004	0.5714	1.1429
C14H16O8S1	0.334939	0.782568	0.5714	1.1429
C14H16O9	-0.96737	0.163077	0.6429	1.1429
C14H16O9N2	-0.907055	0.27665	0.6429	1.1429
C14H16O9S1	0.259902	0.832619	0.6429	1.1429
C14H17O10N1	-0.680947	0.523137	0.7143	1.2143
C14H17O2N1	-0.99843	0.0356729	0.1429	1.2143
C14H17O3N1	-0.999855	0.0108583	0.2143	1.2143
C14H17O4N1	-0.94655	0.209085	0.2857	1.2143
C14H17O5N1	-0.839184	0.366066	0.3571	1.2143
C14H17O5N1S1	0.277627	0.820904	0.3571	1.2143
C14H17O6N1	-0.777779	0.432692	0.4286	1.2143
C14H17O6N1S1	-0.182933	0.882881	0.4286	1.2143
C14H17O7N1	-0.847568	0.356132	0.5	1.2143
C14H17O7N1S1	-0.996981	0.0494775	0.5	1.2143
C14H17O8N1	-0.989422	0.0926786	0.5714	1.2143
C14H17O8N1S1	-0.0184685	0.988242	0.5714	1.2143
C14H17O9N1	-0.864257	0.335579	0.6429	1.2143
C14H18O1	0.428554	0.718046	0.0714	1.2857
C14H18O10	-0.844463	0.359839	0.7143	1.2857
C14H18O2	-0.21025	0.865144	0.1429	1.2857
C14H18O2N2	-0.895759	0.293266	0.1429	1.2857
C14H18O3	-0.966623	0.164944	0.2143	1.2857
C14H18O3N2	0.363939	0.762863	0.2143	1.2857
C14H18O3S1	0.826963	0.380133	0.2143	1.2857
C14H18O4	0.975528	0.141131	0.2857	1.2857
C14H18O4N2	-0.845777	0.358275	0.2857	1.2857
C14H18O4S1	-0.793715	0.416288	0.2857	1.2857
C14H18O5	0.999458	0.0209691	0.3571	1.2857
C14H18O5N2	-0.876282	0.320033	0.3571	1.2857
C14H18O5N2S1	0.779437	0.43101	0.3571	1.2857
C14H18O5S1	0.902436	0.283554	0.3571	1.2857
C14H18O6	-0.647746	0.551424	0.4286	1.2857
C14H18O6N2	-0.986376	0.105206	0.4286	1.2857
C14H18O6N2S1	0.636657	0.560634	0.4286	1.2857
C14H18O6S1	0.577271	0.608236	0.4286	1.2857
C14H18O7	0.97469	0.143535	0.5	1.2857
C14H18O7N2	-0.951183	0.199739	0.5	1.2857
C14H18O7N2S1	-0.00349674	0.997774	0.5	1.2857
C14H18O7S1	0.631033	0.565263	0.5	1.2857
C14H18O8	-0.963425	0.172711	0.5714	1.2857
C14H18O8N2	-0.998302	0.0371015	0.5714	1.2857
C14H18O8S1	0.306481	0.801697	0.5714	1.2857
C14H18O9	-0.327105	0.787854	0.6429	1.2857
C14H18O9S1	0.14782	0.905549	0.6429	1.2857
C14H19O2N1	0.360092	0.76549	0.1429	1.3571
C14H19O3N1	-0.824495	0.382919	0.2143	1.3571
C14H19O4N1	0.423626	0.721514	0.2857	1.3571
C14H19O5N1	-0.956979	0.187415	0.3571	1.3571
C14H19O6N1	-0.743977	0.465874	0.4286	1.3571
C14H19O6N1S1	-0.268554	0.826909	0.4286	1.3571
C14H19O7N1	-0.887573	0.30478	0.5	1.3571
C14H19O7N1S1	0.26373	0.830094	0.5	1.3571
C14H19O7N3	-0.503677	0.66396	0.5	1.3571
C14H19O8N1	-0.970569	0.154836	0.5714	1.3571
C14H19O8N1S1	0.547103	0.631461	0.5714	1.3571
C14H19O9N1	-0.835509	0.370346	0.6429	1.3571
C14H20O1	-0.738451	0.471115	0.0714	1.4286
C14H20O10	-0.88356	0.310279	0.7143	1.4286
C14H20O10S1	-0.972574	0.149442	0.7143	1.4286
C14H20O2	0.266234	0.828441	0.1429	1.4286
C14H20O2N2	-0.769953	0.440559	0.1429	1.4286
C14H20O3	0.207017	0.867249	0.2143	1.4286
C14H20O3N2	-0.997279	0.0469708	0.2143	1.4286
C14H20O3S1	0.77594	0.434552	0.2143	1.4286
C14H20O4	-0.931149	0.237615	0.2857	1.4286
C14H20O4N2	-0.958461	0.184136	0.2857	1.4286
C14H20O4S1	-0.718305	0.489837	0.2857	1.4286
C14H20O5	-0.795028	0.414912	0.3571	1.4286
C14H20O5N2	0.100475	0.935927	0.3571	1.4286
C14H20O5S1	0.741355	0.468367	0.3571	1.4286
C14H20O6	-0.789911	0.420253	0.4286	1.4286
C14H20O6N2	-0.916929	0.26132	0.4286	1.4286
C14H20O6S1	0.529973	0.644404	0.4286	1.4286
C14H20O7	-0.789602	0.420574	0.5	1.4286
C14H20O7S1	0.679892	0.524053	0.5	1.4286
C14H20O7S2	0.697864	0.508268	0.5	1.4286
C14H20O8	-0.940516	0.220684	0.5714	1.4286
C14H20O8N2	-0.997871	0.0415447	0.5714	1.4286
C14H20O8S1	0.41841	0.725175	0.5714	1.4286
C14H20O9	-0.97789	0.134119	0.6429	1.4286
C14H20O9S1	0.680371	0.523637	0.6429	1.4286
C14H21O2N1	0.781444	0.428966	0.1429	1.5
C14H21O4N1	-0.828567	0.378313	0.2857	1.5
C14H21O5N1	-0.670733	0.531959	0.3571	1.5
C14H21O5N1S1	-0.305406	0.802415	0.3571	1.5
C14H21O5N3	-0.286343	0.815121	0.3571	1.5
C14H21O6N1	-0.795312	0.414614	0.4286	1.5
C14H21O6N1S1	-0.529815	0.644522	0.4286	1.5
C14H21O6N3	0.536397	0.63957	0.4286	1.5
C14H21O6N5S2	-0.529353	0.64487	0.4286	1.5
C14H21O7N1	-0.849708	0.353556	0.5	1.5
C14H21O7N1S1	-0.0309452	0.980297	0.5	1.5
C14H21O7N3	-0.896097	0.292782	0.5	1.5
C14H21O8N1	-0.88822	0.303885	0.5714	1.5
C14H21O8N1S1	-0.424522	0.720884	0.5714	1.5
C14H21O9N1	-0.760936	0.44948	0.6429	1.5
C14H22O10	-0.971534	0.152264	0.7143	1.5714
C14H22O10S1	-0.65052	0.549102	0.7143	1.5714
C14H22O3S1	0.760362	0.450043	0.2143	1.5714
C14H22O4S1	0.841693	0.363118	0.2857	1.5714
C14H22O5	0.106812	0.931871	0.3571	1.5714
C14H22O5S1	0.921566	0.253821	0.3571	1.5714
C14H22O6	-0.865918	0.33347	0.4286	1.5714
C14H22O6N2	-0.964363	0.170469	0.4286	1.5714
C14H22O6S1	0.986543	0.104558	0.4286	1.5714
C14H22O7	-0.135752	0.91331	0.5	1.5714
C14H22O7N2	-0.934227	0.232182	0.5	1.5714
C14H22O7S1	-0.0673747	0.957075	0.5	1.5714
C14H22O8	-0.939336	0.222885	0.5714	1.5714
C14H22O8S1	-0.964439	0.170286	0.5714	1.5714
C14H22O9	-0.921926	0.253229	0.6429	1.5714
C14H22O9S1	-0.537412	0.638804	0.6429	1.5714
C14H23O4N1	0.120273	0.923246	0.2857	1.6429
C14H23O5N1	-0.991935	0.0809093	0.3571	1.6429
C14H23O6N1	-0.734332	0.474991	0.4286	1.6429
C14H23O6N1S1	0.302986	0.804033	0.4286	1.6429
C14H23O6N3	0.769257	0.441253	0.4286	1.6429
C14H23O7N1	-0.672394	0.530532	0.5	1.6429
C14H23O7N1S1	-0.116618	0.925589	0.5	1.6429
C14H23O8N1	-0.986559	0.104496	0.5714	1.6429
C14H24O2	0.65362	0.546499	0.1429	1.7143
C14H24O3	0.800398	0.409243	0.2143	1.7143
C14H24O4	0.949186	0.203817	0.2857	1.7143
C14H24O4S1	0.753459	0.456767	0.2857	1.7143
C14H24O5S1	0.930015	0.239586	0.3571	1.7143
C14H24O6	-0.946153	0.209868	0.4286	1.7143
C14H24O6S1	0.606446	0.585189	0.4286	1.7143
C14H24O7	-0.949234	0.203721	0.5	1.7143
C14H24O7S1	-0.558308	0.622901	0.5	1.7143
C14H24O8	-0.94036	0.220976	0.5714	1.7143
C14H24O8S1	-0.741729	0.468012	0.5714	1.7143
C14H24O9	-0.905615	0.278819	0.6429	1.7143
C14H24O9S1	-0.75743	0.452909	0.6429	1.7143
C14H26O10	0.998109	0.0391523	0.7143	1.8571
C14H26O4	0.958347	0.184391	0.2857	1.8571
C14H26O4S1	0.477851	0.682832	0.2857	1.8571
C14H26O5	-0.795188	0.414744	0.3571	1.8571
C14H26O5S1	0.945005	0.212113	0.3571	1.8571
C14H26O6	-0.916916	0.261341	0.4286	1.8571
C14H26O6S1	0.713015	0.494658	0.4286	1.8571
C14H26O7	-0.353645	0.769884	0.5	1.8571
C14H28O11S1	-0.384636	0.748654	0.7857	2
C14H28O3S1	0.16196	0.896437	0.2143	2
C14H28O4S1	-0.624237	0.57082	0.2857	2
C14H30O4S1	-0.350285	0.77217	0.2857	2.1429
C14H30O5S1	0.968872	0.159259	0.3571	2.1429
C14H7O6N1	-0.444166	0.707	0.4286	0.5
C14H7O7N1	-0.890286	0.301008	0.5	0.5
C14H8O3	0.129792	0.917138	0.2143	0.5714
C14H8O4	-0.724436	0.484201	0.2857	0.5714
C14H8O4N2	-0.436748	0.71226	0.2857	0.5714
C14H8O4S1	0.311326	0.798454	0.2857	0.5714
C14H8O5	-0.16773	0.892713	0.3571	0.5714
C14H8O5N2	-0.933353	0.233736	0.3571	0.5714
C14H8O6	-0.927901	0.243222	0.4286	0.5714
C14H8O6N2	-0.967194	0.163519	0.4286	0.5714
C14H8O6S1	-0.693066	0.512519	0.4286	0.5714
C14H8O7	-0.985207	0.109638	0.5	0.5714
C14H8O8	-0.983267	0.116623	0.5714	0.5714
C14H8O9	-0.832872	0.37339	0.6429	0.5714
C14H9O2N1	-0.80362	0.405809	0.1429	0.6429
C14H9O3N1	-0.865715	0.333728	0.2143	0.6429
C14H9O4N1	-0.802033	0.407504	0.2857	0.6429
C14H9O5N1	-0.808461	0.400601	0.3571	0.6429
C14H9O6N1	-0.560375	0.621314	0.4286	0.6429
C14H9O7N1	-0.793447	0.416569	0.5	0.6429
C14H9O7N1S1	-0.560164	0.621476	0.5	0.6429
C14H9O8N1	-0.989083	0.0941543	0.5714	0.6429
C15H10O10	-0.818424	0.389697	0.6667	0.6667
C15H10O2	-0.920844	0.255002	0.1333	0.6667
C15H10O3	-0.385934	0.747758	0.2	0.6667
C15H10O4	-0.566175	0.616845	0.2667	0.6667
C15H10O4N2	-0.689941	0.515273	0.2667	0.6667
C15H10O5	-0.636886	0.560444	0.3333	0.6667
C15H10O5N2	-0.761322	0.449102	0.3333	0.6667
C15H10O5S1	0.39244	0.743262	0.3333	0.6667
C15H10O6	-0.820406	0.387495	0.4	0.6667
C15H10O6N2	-0.999976	0.00437225	0.4	0.6667
C15H10O6S1	-0.519798	0.652015	0.4	0.6667
C15H10O7	-0.693447	0.512182	0.4667	0.6667
C15H10O7N2	-0.963176	0.1733	0.4667	0.6667
C15H10O7S1	0.575185	0.60986	0.4667	0.6667
C15H10O8	-0.926911	0.244907	0.5333	0.6667
C15H10O8N2	-0.90713	0.276537	0.5333	0.6667
C15H10O8S1	-0.0931688	0.940601	0.5333	0.6667
C15H10O9	-0.876404	0.319872	0.6	0.6667
C15H11O3N1	0.763447	0.447011	0.2	0.7333
C15H11O4N1	0.959255	0.182355	0.2667	0.7333
C15H11O5N1	0.0831485	0.947005	0.3333	0.7333
C15H11O5N1S1	0.918047	0.25953	0.3333	0.7333
C15H11O6N1	-0.834835	0.371126	0.4	0.7333
C15H11O6N1S1	-0.291127	0.81194	0.4	0.7333
C15H11O7N1	-0.746211	0.463742	0.4667	0.7333
C15H11O7N1S1	-0.77901	0.431444	0.4667	0.7333
C15H11O8N1	-0.794101	0.415884	0.5333	0.7333
C15H11O9N1	-0.910252	0.271776	0.6	0.7333
C15H12O10	-0.899146	0.288378	0.6667	0.8
C15H12O11	-0.951614	0.198847	0.7333	0.8
C15H12O2	0.805347	0.403958	0.1333	0.8
C15H12O3	0.313366	0.797087	0.2	0.8
C15H12O3N2	-0.71576	0.492161	0.2	0.8
C15H12O4	-0.995494	0.0604572	0.2667	0.8
C15H12O4N2	0.15763	0.89923	0.2667	0.8
C15H12O4S1	0.946814	0.208563	0.2667	0.8
C15H12O5	-0.395541	0.741114	0.3333	0.8
C15H12O5N2	-0.865894	0.3335	0.3333	0.8
C15H12O5S1	0.895086	0.294228	0.3333	0.8
C15H12O6	-0.792718	0.41733	0.4	0.8
C15H12O6N2	-0.991672	0.0822184	0.4	0.8
C15H12O6S1	-0.704956	0.501933	0.4	0.8
C15H12O7	-0.905305	0.279285	0.4667	0.8
C15H12O7N2	-0.760157	0.450244	0.4667	0.8
C15H12O7S1	0.86424	0.335599	0.4667	0.8
C15H12O8	-0.752106	0.458076	0.5333	0.8
C15H12O8N2	-0.826047	0.38117	0.5333	0.8
C15H12O8S1	0.06478	0.958731	0.5333	0.8
C15H12O9	-0.892881	0.297361	0.6	0.8
C15H12O9N2	-0.983711	0.115061	0.6	0.8
C15H12O9S1	-0.977041	0.13668	0.6	0.8
C15H13O3N1	-0.898541	0.289256	0.2	0.8667
C15H13O4N1	0.702109	0.504484	0.2667	0.8667
C15H13O5N1	-0.999048	0.0277814	0.3333	0.8667
C15H13O5N1S1	0.847373	0.356366	0.3333	0.8667
C15H13O6N1	-0.518518	0.652968	0.4	0.8667
C15H13O6N1S1	0.770508	0.440006	0.4	0.8667
C15H13O7N1	-0.787608	0.422639	0.4667	0.8667
C15H13O7N1S1	0.0672007	0.957186	0.4667	0.8667
C15H13O8N1	-0.645108	0.553625	0.5333	0.8667
C15H13O8N1S1	0.114964	0.926649	0.5333	0.8667
C15H13O9N1	-0.969148	0.158548	0.6	0.8667
C15H14O10	-0.998187	0.0383424	0.6667	0.9333
C15H14O11	-0.821352	0.38644	0.7333	0.9333
C15H14O2	0.574614	0.610305	0.1333	0.9333
C15H14O3	-0.217142	0.860653	0.2	0.9333
C15H14O3N2	-0.760838	0.449576	0.2	0.9333
C15H14O4	0.285013	0.816004	0.2667	0.9333
C15H14O4N2	-0.398312	0.739192	0.2667	0.9333
C15H14O4S1	0.93305	0.234274	0.2667	0.9333
C15H14O5	-0.264862	0.829347	0.3333	0.9333
C15H14O5N2	-0.865674	0.33378	0.3333	0.9333
C15H14O5S1	0.766278	0.444213	0.3333	0.9333
C15H14O6	-0.783195	0.427177	0.4	0.9333
C15H14O6N2	-0.310921	0.798725	0.4	0.9333
C15H14O6N2S1	0.63637	0.560871	0.4	0.9333
C15H14O6S1	0.777017	0.433464	0.4	0.9333
C15H14O7	-0.660292	0.540865	0.4667	0.9333
C15H14O7N2	-0.812108	0.39664	0.4667	0.9333
C15H14O7N2S1	-0.0588929	0.962486	0.4667	0.9333
C15H14O7S1	0.998824	0.0308836	0.4667	0.9333
C15H14O8	0.0324727	0.979324	0.5333	0.9333
C15H14O8N2	-0.983923	0.114308	0.5333	0.9333
C15H14O8S1	-0.328502	0.786913	0.5333	0.9333
C15H14O9	-0.921655	0.253676	0.6	0.9333
C15H14O9N2	-0.927917	0.243196	0.6	0.9333
C15H14O9S1	-0.706414	0.500624	0.6	0.9333
C15H15O10N1	-0.974713	0.143472	0.6667	1
C15H15O2N1	-0.473823	0.685747	0.1333	1
C15H15O3N1	0.0837252	0.946636	0.2	1
C15H15O3P1	0.83103	0.375504	0.2	1
C15H15O4N1	-0.999798	0.0127948	0.2667	1
C15H15O5N1	0.984908	0.110742	0.3333	1
C15H15O5N1S1	-0.24882	0.839914	0.3333	1
C15H15O6N1	-0.667099	0.535072	0.4	1
C15H15O6N1S1	0.600956	0.589573	0.4	1
C15H15O7N1	-0.865834	0.333577	0.4667	1
C15H15O7N1S1	0.993415	0.0730979	0.4667	1
C15H15O8N1	-0.893288	0.296785	0.5333	1
C15H15O8N1S1	-0.834495	0.371519	0.5333	1
C15H15O9N1	-0.976957	0.13693	0.6	1
C15H16O10	-0.999911	0.00850518	0.6667	1.0667
C15H16O10N2	-0.847869	0.35577	0.6667	1.0667
C15H16O10S1	-0.798887	0.410845	0.6667	1.0667
C15H16O11	-0.585125	0.602091	0.7333	1.0667
C15H16O2	0.895717	0.293326	0.1333	1.0667
C15H16O2N2	-0.806691	0.402512	0.1333	1.0667
C15H16O3	0.801452	0.408123	0.2	1.0667
C15H16O3N2	-0.894496	0.29507	0.2	1.0667
C15H16O3S1	0.724367	0.484264	0.2	1.0667
C15H16O4	-0.730869	0.47823	0.2667	1.0667
C15H16O4N2	-0.694497	0.511254	0.2667	1.0667
C15H16O4S1	0.574964	0.610032	0.2667	1.0667
C15H16O5	-0.978409	0.132529	0.3333	1.0667
C15H16O5N2	-0.967568	0.162579	0.3333	1.0667
C15H16O5S1	0.894793	0.294646	0.3333	1.0667
C15H16O6	0.172087	0.889898	0.4	1.0667
C15H16O6N2	-0.970279	0.155601	0.4	1.0667
C15H16O6N2S1	0.0409164	0.973945	0.4	1.0667
C15H16O6S1	0.948487	0.205227	0.4	1.0667
C15H16O7	-0.291633	0.811603	0.4667	1.0667
C15H16O7N2	-0.9489	0.204395	0.4667	1.0667
C15H16O7N2S1	-0.998502	0.0348504	0.4667	1.0667
C15H16O7S1	0.607862	0.584055	0.4667	1.0667
C15H16O8	-0.892877	0.297366	0.5333	1.0667
C15H16O8N2	-0.950582	0.200975	0.5333	1.0667
C15H16O8N2S1	-0.999944	0.0067294	0.5333	1.0667
C15H16O8S1	0.967704	0.162236	0.5333	1.0667
C15H16O9	-0.984615	0.111816	0.6	1.0667
C15H16O9N2	-0.833449	0.372725	0.6	1.0667
C15H16O9S1	-0.666337	0.535722	0.6	1.0667
C15H17O10N1	-0.83615	0.369602	0.6667	1.1333
C15H17O3N1	-0.6546	0.545674	0.2	1.1333
C15H17O4N1	-0.815667	0.39274	0.2667	1.1333
C15H17O5N1	-0.95651	0.188441	0.3333	1.1333
C15H17O5N1S1	0.474196	0.685478	0.3333	1.1333
C15H17O6N1	-0.914405	0.265319	0.4	1.1333
C15H17O6N1S1	0.96652	0.1652	0.4	1.1333
C15H17O7N1	-0.829339	0.377434	0.4667	1.1333
C15H17O7N1S1	-0.668855	0.533569	0.4667	1.1333
C15H17O8N1	-0.986629	0.104224	0.5333	1.1333
C15H17O8N1S1	-0.98762	0.100276	0.5333	1.1333
C15H17O9N1	-0.993805	0.0708975	0.6	1.1333
C15H17O9N1S1	-0.173007	0.889304	0.6	1.1333
C15H18O10	-0.95198	0.198089	0.6667	1.2
C15H18O10S1	-0.984227	0.113222	0.6667	1.2
C15H18O11	-0.734353	0.474972	0.7333	1.2
C15H18O2	0.0390121	0.975158	0.1333	1.2
C15H18O2N2	-0.614729	0.578531	0.1333	1.2
C15H18O3	-0.717246	0.490805	0.2	1.2
C15H18O3N2	-0.877542	0.318364	0.2	1.2
C15H18O3S1	0.868118	0.330659	0.2	1.2
C15H18O4	0.74108	0.468628	0.2667	1.2
C15H18O4N2	-0.727905	0.480988	0.2667	1.2
C15H18O4S1	0.971699	0.15182	0.2667	1.2
C15H18O5	-0.838128	0.3673	0.3333	1.2
C15H18O5N2	-0.803786	0.405631	0.3333	1.2
C15H18O5S1	-0.821914	0.385813	0.3333	1.2
C15H18O6	-0.728379	0.480548	0.4	1.2
C15H18O6N2	0.415192	0.727429	0.4	1.2
C15H18O6N2S1	-0.0271494	0.982714	0.4	1.2
C15H18O6S1	-0.932961	0.234431	0.4	1.2
C15H18O7	-0.877818	0.317998	0.4667	1.2
C15H18O7N2	-0.912428	0.268411	0.4667	1.2
C15H18O7N2S1	-0.900815	0.28594	0.4667	1.2
C15H18O7S1	0.663217	0.538382	0.4667	1.2
C15H18O8	-0.722246	0.48622	0.5333	1.2
C15H18O8N2	-0.978339	0.132746	0.5333	1.2
C15H18O8S1	0.304984	0.802698	0.5333	1.2
C15H18O9	-0.0414835	0.973583	0.6	1.2
C15H18O9N2	-0.998959	0.0290506	0.6	1.2
C15H18O9S1	0.0754952	0.951893	0.6	1.2
C15H19O10N1	-0.752141	0.458043	0.6667	1.2667
C15H19O2N1	0.526305	0.647154	0.1333	1.2667
C15H19O3N1	0.714866	0.492975	0.2	1.2667
C15H19O4N1	-0.172519	0.889618	0.2667	1.2667
C15H19O5N1	-0.877815	0.318001	0.3333	1.2667
C15H19O5N1S1	0.554214	0.626037	0.3333	1.2667
C15H19O6N1	-0.794012	0.415978	0.4	1.2667
C15H19O6N1S1	0.501659	0.665446	0.4	1.2667
C15H19O7N1	-0.834419	0.371607	0.4667	1.2667
C15H19O7N1S1	0.98582	0.107337	0.4667	1.2667
C15H19O8N1	-0.945019	0.212086	0.5333	1.2667
C15H19O8N1S1	-0.0530508	0.966211	0.5333	1.2667
C15H19O9N1	-0.995593	0.0597907	0.6	1.2667
C15H19O9N1S1	-0.943781	0.214483	0.6	1.2667
C15H20O1	-0.918401	0.258961	0.0667	1.3333
C15H20O10	0.964532	0.170061	0.6667	1.3333
C15H20O10S1	-0.808865	0.400164	0.6667	1.3333
C15H20O11	-0.977918	0.134035	0.7333	1.3333
C15H20O2	-0.916845	0.261454	0.1333	1.3333
C15H20O3	-0.983093	0.117231	0.2	1.3333
C15H20O3N2	-0.370506	0.758369	0.2	1.3333
C15H20O3S1	0.858277	0.34307	0.2	1.3333
C15H20O4	-0.884164	0.309458	0.2667	1.3333
C15H20O4N2	-0.99908	0.0273088	0.2667	1.3333
C15H20O4S1	-0.737906	0.471629	0.2667	1.3333
C15H20O5	0.891842	0.298826	0.3333	1.3333
C15H20O5N2	-0.860748	0.339993	0.3333	1.3333
C15H20O5S1	0.772014	0.438499	0.3333	1.3333
C15H20O6	-0.299716	0.806216	0.4	1.3333
C15H20O6N2	-0.783335	0.427034	0.4	1.3333
C15H20O6S1	0.508651	0.660289	0.4	1.3333
C15H20O7	-0.865024	0.334606	0.4667	1.3333
C15H20O7N2	-0.881229	0.313433	0.4667	1.3333
C15H20O7N2S1	-0.587831	0.599964	0.4667	1.3333
C15H20O7S1	-0.853808	0.348574	0.4667	1.3333
C15H20O8	-0.887606	0.304734	0.5333	1.3333
C15H20O8N2	-0.953958	0.193933	0.5333	1.3333
C15H20O8S1	0.560502	0.621217	0.5333	1.3333
C15H20O9	-0.972071	0.150814	0.6	1.3333
C15H20O9N2	-0.973872	0.145848	0.6	1.3333
C15H20O9S1	-0.638956	0.558733	0.6	1.3333
C15H21O10N1	-0.981261	0.123438	0.6667	1.4
C15H21O3N1	-0.994821	0.0648182	0.2	1.4
C15H21O4N1	-0.938928	0.22364	0.2667	1.4
C15H21O5N1	-0.785788	0.424515	0.3333	1.4
C15H21O5N1S1	0.253144	0.837071	0.3333	1.4
C15H21O6N1	-0.78559	0.424719	0.4	1.4
C15H21O6N1S1	0.999902	0.00892988	0.4	1.4
C15H21O7N1	-0.810786	0.39808	0.4667	1.4
C15H21O7N1S1	-0.657777	0.542994	0.4667	1.4
C15H21O7N3	-0.637673	0.559794	0.4667	1.4
C15H21O8N1	-0.891862	0.298799	0.5333	1.4
C15H21O8N1S1	0.262666	0.830797	0.5333	1.4
C15H21O9N1	-0.98245	0.119447	0.6	1.4
C15H22O1	0.934787	0.231181	0.0667	1.4667
C15H22O10	-0.987613	0.100305	0.6667	1.4667
C15H22O10S1	-0.912018	0.269048	0.6667	1.4667
C15H22O11	-0.968472	0.160283	0.7333	1.4667
C15H22O3S1	0.721777	0.486651	0.2	1.4667
C15H22O4	0.765353	0.445129	0.2667	1.4667
C15H22O4S1	0.632164	0.564334	0.2667	1.4667
C15H22O5	0.970289	0.155573	0.3333	1.4667
C15H22O5N2	-0.247949	0.840487	0.3333	1.4667
C15H22O5S1	0.951895	0.198265	0.3333	1.4667
C15H22O6	0.465868	0.691484	0.4	1.4667
C15H22O6S1	0.750449	0.459675	0.4	1.4667
C15H22O7	-0.940986	0.219802	0.4667	1.4667
C15H22O7N2	-0.786633	0.423645	0.4667	1.4667
C15H22O7S1	0.867688	0.33121	0.4667	1.4667
C15H22O7S2	0.744704	0.465181	0.4667	1.4667
C15H22O8	-0.943109	0.215773	0.5333	1.4667
C15H22O8N2	-0.981187	0.123682	0.5333	1.4667
C15H22O8S1	-0.796153	0.413731	0.5333	1.4667
C15H22O9	-0.940176	0.22132	0.6	1.4667
C15H22O9S1	-0.979606	0.128791	0.6	1.4667
C15H23O3N1	-0.404665	0.734776	0.2	1.5333
C15H23O4N1	-0.373409	0.756378	0.2667	1.5333
C15H23O5N1	-0.403277	0.735742	0.3333	1.5333
C15H23O5N1S1	0.311583	0.798282	0.3333	1.5333
C15H23O6N1	-0.839066	0.366204	0.4	1.5333
C15H23O6N1S1	0.506441	0.661922	0.4	1.5333
C15H23O6N3	-0.443088	0.707766	0.4	1.5333
C15H23O7N1	-0.940814	0.220125	0.4667	1.5333
C15H23O7N1S1	0.968812	0.159413	0.4667	1.5333
C15H23O8N1	-0.918197	0.259289	0.5333	1.5333
C15H23O8N1S1	-0.290876	0.812107	0.5333	1.5333
C15H23O9N1	-0.999874	0.0101241	0.6	1.5333
C15H24O1	0.980423	0.126175	0.0667	1.6
C15H24O10	-0.990699	0.0868951	0.6667	1.6
C15H24O10S1	-0.433243	0.714738	0.6667	1.6
C15H24O3S1	0.210467	0.865003	0.2	1.6
C15H24O4	0.338225	0.780347	0.2667	1.6
C15H24O4S1	-0.455446	0.69896	0.2667	1.6
C15H24O5	0.972404	0.149907	0.3333	1.6
C15H24O5S1	0.949143	0.203906	0.3333	1.6
C15H24O6	-0.966712	0.164722	0.4	1.6
C15H24O6N2	0.0760936	0.95151	0.4	1.6
C15H24O6S1	0.938045	0.225269	0.4	1.6
C15H24O7	0.328242	0.787088	0.4667	1.6
C15H24O7N2	-0.24396	0.843107	0.4667	1.6
C15H24O7S1	0.892713	0.297597	0.4667	1.6
C15H24O8	-0.85857	0.342706	0.5333	1.6
C15H24O8S1	-0.869448	0.328949	0.5333	1.6
C15H24O9	-0.867089	0.331977	0.6	1.6
C15H24O9S1	-0.99838	0.0362442	0.6	1.6
C15H25O6N1	-0.865507	0.333993	0.4	1.6667
C15H25O6N1S1	0.263135	0.830487	0.4	1.6667
C15H25O7N1	-0.319832	0.792747	0.4667	1.6667
C15H25O7N1S1	-0.443552	0.707436	0.4667	1.6667
C15H25O8N1	-0.616562	0.57705	0.5333	1.6667
C15H26O3	0.64215	0.556085	0.2	1.7333
C15H26O4	0.702143	0.504453	0.2667	1.7333
C15H26O4S1	0.59072	0.597687	0.2667	1.7333
C15H26O5	0.260877	0.831976	0.3333	1.7333
C15H26O5S1	0.984135	0.113551	0.3333	1.7333
C15H26O6	-0.312322	0.797786	0.4	1.7333
C15H26O6S1	0.902158	0.283964	0.4	1.7333
C15H26O7	-0.906543	0.277423	0.4667	1.7333
C15H26O7S1	0.025845	0.983545	0.4667	1.7333
C15H26O8	-0.944955	0.212211	0.5333	1.7333
C15H26O8S1	-0.987318	0.101498	0.5333	1.7333
C15H26O9	-0.92157	0.253815	0.6	1.7333
C15H28O4	0.444118	0.707034	0.2667	1.8667
C15H28O5	0.916359	0.262229	0.3333	1.8667
C15H28O5S1	0.78297	0.427408	0.3333	1.8667
C15H28O6	0.70663	0.500429	0.4	1.8667
C15H28O7	0.27294	0.824008	0.4667	1.8667
C15H28O8	0.336508	0.781508	0.5333	1.8667
C15H8O5	-0.969394	0.157911	0.3333	0.5333
C15H8O6	0.0624339	0.960227	0.4	0.5333
C15H8O6S1	-0.288659	0.813581	0.4	0.5333
C15H8O7	-0.954294	0.193218	0.4667	0.5333
C15H8O8	-0.947293	0.207613	0.5333	0.5333
C15H9O4N1	-0.597536	0.592293	0.2667	0.6
C15H9O5N1	-0.772727	0.437784	0.3333	0.6
C15H9O6N1	-0.878073	0.317658	0.4	0.6
C15H9O7N1	-0.959135	0.182624	0.4667	0.6
C15H9O8N1	-0.998647	0.0331239	0.5333	0.6
C16H10O10	0.0389842	0.975176	0.625	0.625
C16H10O3	-0.902954	0.282788	0.1875	0.625
C16H10O4	0.0166398	0.989406	0.25	0.625
C16H10O5	-0.778548	0.431914	0.3125	0.625
C16H10O6	-0.834233	0.371822	0.375	0.625
C16H10O6N2	-0.78722	0.423039	0.375	0.625
C16H10O7	-0.684731	0.519839	0.4375	0.625
C16H10O7S1	-0.849326	0.354017	0.4375	0.625
C16H10O8	-0.879152	0.31622	0.5	0.625
C16H10O9	-0.931025	0.237831	0.5625	0.625
C16H11O4N1	-0.996323	0.0546084	0.25	0.6875
C16H11O5N1	-0.767945	0.442558	0.3125	0.6875
C16H11O6N1	-0.616295	0.577265	0.375	0.6875
C16H11O7N1	-0.992667	0.0771445	0.4375	0.6875
C16H11O8N1	-0.998159	0.0386327	0.5	0.6875
C16H11O9N1	-0.913487	0.266759	0.5625	0.6875
C16H12O10	-0.838979	0.366306	0.625	0.75
C16H12O11	-0.959985	0.180703	0.6875	0.75
C16H12O2	-0.378331	0.752996	0.125	0.75
C16H12O3	-0.867028	0.332055	0.1875	0.75
C16H12O4	-0.860656	0.340108	0.25	0.75
C16H12O4N2	-0.607642	0.584231	0.25	0.75
C16H12O5N2	0.996311	0.0547008	0.3125	0.75
C16H12O6	-0.565352	0.61748	0.375	0.75
C16H12O6N2	-0.945166	0.211799	0.375	0.75
C16H12O6S1	0.972392	0.149939	0.375	0.75
C16H12O7	-0.54881	0.630162	0.4375	0.75
C16H12O7N2	-0.670797	0.531904	0.4375	0.75
C16H12O7S1	-0.618448	0.575523	0.4375	0.75
C16H12O8	0.348142	0.773625	0.5	0.75
C16H12O8N2	-0.840984	0.363954	0.5	0.75
C16H12O8S1	-0.735447	0.473945	0.5	0.75
C16H12O9	-0.736083	0.473347	0.5625	0.75
C16H12O9N2	-0.955054	0.191594	0.5625	0.75
C16H12O9S1	-0.214869	0.862135	0.5625	0.75
C16H13O10N1	-0.999894	0.0092844	0.625	0.8125
C16H13O3N1	0.940161	0.221349	0.1875	0.8125
C16H13O4N1	-0.306523	0.801668	0.25	0.8125
C16H13O5N1	-0.337222	0.781025	0.3125	0.8125
C16H13O6N1	-0.332926	0.783928	0.375	0.8125
C16H13O7N1	-0.795745	0.414159	0.4375	0.8125
C16H13O8N1	-0.63582	0.561324	0.5	0.8125
C16H13O8N1S1	-0.844143	0.36022	0.5	0.8125
C16H13O9N1	-0.725284	0.483416	0.5625	0.8125
C16H14O10	-0.81646	0.391867	0.625	0.875
C16H14O11	-0.981981	0.121038	0.6875	0.875
C16H14O2	0.973295	0.147455	0.125	0.875
C16H14O3	0.821877	0.385854	0.1875	0.875
C16H14O4	0.697825	0.508303	0.25	0.875
C16H14O4N2	0.766808	0.443688	0.25	0.875
C16H14O5N2	-0.560604	0.621138	0.3125	0.875
C16H14O5S1	0.769187	0.441323	0.3125	0.875
C16H14O6	-0.50757	0.661088	0.375	0.875
C16H14O6N2	-0.467608	0.690232	0.375	0.875
C16H14O6S1	0.873061	0.324263	0.375	0.875
C16H14O7	-0.741396	0.468328	0.4375	0.875
C16H14O7N2	-0.895798	0.29321	0.4375	0.875
C16H14O7S1	0.676123	0.527317	0.4375	0.875
C16H14O8	-0.603179	0.587801	0.5	0.875
C16H14O8N2	-0.95922	0.182434	0.5	0.875
C16H14O8S1	0.541617	0.635624	0.5	0.875
C16H14O9	0.0011733	0.999253	0.5625	0.875
C16H14O9N2	-0.997173	0.0478796	0.5625	0.875
C16H14O9S1	-0.976685	0.137739	0.5625	0.875
C16H15O10N1	-0.988601	0.0962146	0.625	0.9375
C16H15O3N1	0.662915	0.538638	0.1875	0.9375
C16H15O4N1	0.269333	0.826394	0.25	0.9375
C16H15O5N1	0.342837	0.777225	0.3125	0.9375
C16H15O6N1	-0.87462	0.322222	0.375	0.9375
C16H15O6N1S1	-0.851532	0.351347	0.375	0.9375
C16H15O7N1	-0.671006	0.531725	0.4375	0.9375
C16H15O7N1S1	-0.419668	0.724293	0.4375	0.9375
C16H15O8N1	-0.793575	0.416435	0.5	0.9375
C16H15O8N1S1	-0.298571	0.80698	0.5	0.9375
C16H15O9N1	-0.907443	0.276063	0.5625	0.9375
C16H16O10	-0.992541	0.077803	0.625	1
C16H16O10N2	-0.887991	0.304202	0.625	1
C16H16O10S1	-0.762333	0.448108	0.625	1
C16H16O11	-0.878547	0.317027	0.6875	1
C16H16O12	-0.502309	0.664968	0.75	1
C16H16O2	0.667179	0.535004	0.125	1
C16H16O3	0.885084	0.308202	0.1875	1
C16H16O3N2	-0.218559	0.859729	0.1875	1
C16H16O3S1	0.930807	0.238212	0.1875	1
C16H16O4	-0.981403	0.122967	0.25	1
C16H16O4N2	-0.970491	0.155041	0.25	1
C16H16O4S1	0.812935	0.395737	0.25	1
C16H16O5	0.682186	0.522059	0.3125	1
C16H16O5N2	-0.612132	0.580625	0.3125	1
C16H16O5S1	0.783132	0.427242	0.3125	1
C16H16O6	-0.613415	0.579591	0.375	1
C16H16O6N2	0.400477	0.737689	0.375	1
C16H16O6N2S1	-0.806597	0.402614	0.375	1
C16H16O6S1	0.983852	0.114561	0.375	1
C16H16O7	-0.728589	0.480353	0.4375	1
C16H16O7N2	-0.0931163	0.940634	0.4375	1
C16H16O7S1	0.951756	0.198553	0.4375	1
C16H16O8	-0.907188	0.276449	0.5	1
C16H16O8N2	-0.85409	0.34823	0.5	1
C16H16O8S1	0.0963959	0.938537	0.5	1
C16H16O9	0.97506	0.142479	0.5625	1
C16H16O9N2	-0.98682	0.103474	0.5625	1
C16H16O9S1	-0.48469	0.677865	0.5625	1
C16H17O10N1	-0.952281	0.197462	0.625	1.0625
C16H17O3N1	0.995879	0.0578134	0.1875	1.0625
C16H17O3P1	0.724958	0.483718	0.1875	1.0625
C16H17O4N1	0.0905962	0.942245	0.25	1.0625
C16H17O5N1	0.411926	0.729712	0.3125	1.0625
C16H17O5N1S1	-0.814008	0.394563	0.3125	1.0625
C16H17O6N1	0.0774792	0.950626	0.375	1.0625
C16H17O6N1S1	-0.996977	0.0495174	0.375	1.0625
C16H17O7N1	-0.801738	0.407818	0.4375	1.0625
C16H17O7N1S1	-0.304917	0.802743	0.4375	1.0625
C16H17O8N1	-0.979198	0.130079	0.5	1.0625
C16H17O8N1S1	0.958068	0.185011	0.5	1.0625
C16H17O9N1	-0.975373	0.141579	0.5625	1.0625
C16H17O9N1S1	-0.757888	0.452462	0.5625	1.0625
C16H18O10	-0.998127	0.0389656	0.625	1.125
C16H18O10N2	-0.995777	0.0585246	0.625	1.125
C16H18O10S1	-0.550166	0.629129	0.625	1.125
C16H18O11	-0.924464	0.249025	0.6875	1.125
C16H18O11S1	0.951531	0.199021	0.6875	1.125
C16H18O12	-0.626237	0.569188	0.75	1.125
C16H18O2	0.735043	0.474323	0.125	1.125
C16H18O3	0.282286	0.817815	0.1875	1.125
C16H18O3S1	0.738847	0.470741	0.1875	1.125
C16H18O4	-0.675655	0.527722	0.25	1.125
C16H18O4N2	-0.844044	0.360337	0.25	1.125
C16H18O4S1	0.672988	0.530021	0.25	1.125
C16H18O5	-0.0883847	0.943659	0.3125	1.125
C16H18O5N2	-0.728478	0.480456	0.3125	1.125
C16H18O5S1	0.831405	0.375074	0.3125	1.125
C16H18O6	0.582091	0.604469	0.375	1.125
C16H18O6N2	-0.933677	0.233161	0.375	1.125
C16H18O6N2S1	0.226272	0.854692	0.375	1.125
C16H18O6S1	0.661643	0.539719	0.375	1.125
C16H18O7	-0.786141	0.424152	0.4375	1.125
C16H18O7N2	-0.857981	0.343437	0.4375	1.125
C16H18O7N2S1	0.466826	0.690795	0.4375	1.125
C16H18O7S1	0.819992	0.387956	0.4375	1.125
C16H18O8	-0.823109	0.384475	0.5	1.125
C16H18O8N2	-0.824876	0.382489	0.5	1.125
C16H18O8N2S1	-0.275853	0.82208	0.5	1.125
C16H18O8S1	0.866926	0.332185	0.5	1.125
C16H18O9	-0.966579	0.165052	0.5625	1.125
C16H18O9N2	-0.94709	0.208017	0.5625	1.125
C16H18O9S1	0.967039	0.163906	0.5625	1.125
C16H19O10N1	-0.92265	0.252038	0.625	1.1875
C16H19O11N1	-0.841028	0.363901	0.6875	1.1875
C16H19O3N1	0.897419	0.290879	0.1875	1.1875
C16H19O4N1	-0.941113	0.219563	0.25	1.1875
C16H19O5N1	-0.808371	0.400699	0.3125	1.1875
C16H19O5N1S1	0.965596	0.167475	0.3125	1.1875
C16H19O6N1	-0.822489	0.38517	0.375	1.1875
C16H19O6N1S1	0.756358	0.453954	0.375	1.1875
C16H19O7N1	-0.814705	0.393798	0.4375	1.1875
C16H19O7N1S1	-0.145572	0.906995	0.4375	1.1875
C16H19O8N1	-0.819426	0.388585	0.5	1.1875
C16H19O8N1S1	-0.346119	0.774999	0.5	1.1875
C16H19O9N1	-0.966264	0.165834	0.5625	1.1875
C16H19O9N1S1	0.735482	0.473911	0.5625	1.1875
C16H20O10	-0.976975	0.136877	0.625	1.25
C16H20O10N2	-0.924728	0.248584	0.625	1.25
C16H20O10S1	-0.848588	0.354906	0.625	1.25
C16H20O11	-0.996128	0.056041	0.6875	1.25
C16H20O11S1	-0.340893	0.778541	0.6875	1.25
C16H20O12	-0.618282	0.575658	0.75	1.25
C16H20O2	-0.997321	0.0466116	0.125	1.25
C16H20O3	0.209607	0.865563	0.1875	1.25
C16H20O3N2	0.741583	0.46815	0.1875	1.25
C16H20O4	-0.678838	0.524968	0.25	1.25
C16H20O4N2	-0.452028	0.701402	0.25	1.25
C16H20O4S1	-0.831745	0.374685	0.25	1.25
C16H20O5	-0.71098	0.496503	0.3125	1.25
C16H20O5N2	-0.777046	0.433435	0.3125	1.25
C16H20O5N2S1	0.661377	0.539945	0.3125	1.25
C16H20O5S1	0.768361	0.442145	0.3125	1.25
C16H20O6	-0.719797	0.488469	0.375	1.25
C16H20O6N2	-0.763283	0.447173	0.375	1.25
C16H20O6N2S1	-0.527688	0.646118	0.375	1.25
C16H20O6S1	0.683066	0.521292	0.375	1.25
C16H20O7	-0.788021	0.422212	0.4375	1.25
C16H20O7N2	-0.91816	0.259349	0.4375	1.25
C16H20O7N2S1	0.389287	0.745443	0.4375	1.25
C16H20O7S1	0.70985	0.497525	0.4375	1.25
C16H20O8	0.974015	0.145447	0.5	1.25
C16H20O8N2	-0.872685	0.324754	0.5	1.25
C16H20O8N2S1	-0.985563	0.108309	0.5	1.25
C16H20O8S1	0.820105	0.38783	0.5	1.25
C16H20O9	-0.927099	0.244588	0.5625	1.25
C16H20O9N2	-0.994815	0.0648569	0.5625	1.25
C16H20O9N2S1	-0.923411	0.250778	0.5625	1.25
C16H20O9S1	0.663042	0.53853	0.5625	1.25
C16H21O10N1	-0.976509	0.13826	0.625	1.3125
C16H21O11N1	-0.853705	0.3487	0.6875	1.3125
C16H21O3N1	-0.73186	0.477305	0.1875	1.3125
C16H21O4N1	-0.441988	0.708547	0.25	1.3125
C16H21O5N1	-0.905281	0.27932	0.3125	1.3125
C16H21O5N1S1	0.826372	0.380802	0.3125	1.3125
C16H21O6N1	-0.704428	0.502407	0.375	1.3125
C16H21O6N1S1	0.97741	0.135574	0.375	1.3125
C16H21O7N1	-0.737452	0.472058	0.4375	1.3125
C16H21O7N1S1	0.772557	0.437955	0.4375	1.3125
C16H21O8N1	-0.826406	0.380763	0.5	1.3125
C16H21O8N1S1	-0.317101	0.794581	0.5	1.3125
C16H21O9N1	-0.989194	0.0936722	0.5625	1.3125
C16H21O9N1S1	-0.508533	0.660376	0.5625	1.3125
C16H22O1	0.995348	0.0614334	0.0625	1.375
C16H22O10	0.971372	0.152698	0.625	1.375
C16H22O10S1	-0.99692	0.0499815	0.625	1.375
C16H22O11	-0.983953	0.114202	0.6875	1.375
C16H22O11S1	-0.860705	0.340046	0.6875	1.375
C16H22O2	0.735337	0.474048	0.125	1.375
C16H22O3	-0.124184	0.920737	0.1875	1.375
C16H22O3S1	-0.602298	0.588504	0.1875	1.375
C16H22O4	-0.116267	0.925814	0.25	1.375
C16H22O4N2	0.0511918	0.967396	0.25	1.375
C16H22O4S1	0.715705	0.492211	0.25	1.375
C16H22O5	0.280077	0.81928	0.3125	1.375
C16H22O5N2	-0.360198	0.765418	0.3125	1.375
C16H22O5S1	0.952194	0.197643	0.3125	1.375
C16H22O6	-0.84352	0.360959	0.375	1.375
C16H22O6N2	0.0998605	0.936321	0.375	1.375
C16H22O6N2S1	-0.675031	0.528261	0.375	1.375
C16H22O6S1	0.573175	0.611423	0.375	1.375
C16H22O7	-0.812745	0.395944	0.4375	1.375
C16H22O7N2	-0.911	0.270623	0.4375	1.375
C16H22O7N2S1	0.727519	0.481347	0.4375	1.375
C16H22O7S1	0.725437	0.483275	0.4375	1.375
C16H22O8	-0.936412	0.22825	0.5	1.375
C16H22O8N2	-0.855423	0.346595	0.5	1.375
C16H22O8S1	0.202201	0.870381	0.5	1.375
C16H22O9	-0.0615349	0.960801	0.5625	1.375
C16H22O9N2	-0.966474	0.165314	0.5625	1.375
C16H22O9N2S1	-0.845391	0.358735	0.5625	1.375
C16H22O9S1	-0.767177	0.443321	0.5625	1.375
C16H23O10N1	-0.924145	0.249558	0.625	1.4375
C16H23O4N1	-0.999802	0.0126596	0.25	1.4375
C16H23O5N1	-0.868141	0.33063	0.3125	1.4375
C16H23O5N1S1	0.996579	0.0526751	0.3125	1.4375
C16H23O6N1	-0.918513	0.258782	0.375	1.4375
C16H23O6N1S1	0.738634	0.470942	0.375	1.4375
C16H23O7N1	-0.781632	0.428775	0.4375	1.4375
C16H23O7N1S1	-0.430392	0.71675	0.4375	1.4375
C16H23O7N3	-0.0980322	0.93749	0.4375	1.4375
C16H23O8N1	-0.824942	0.382416	0.5	1.4375
C16H23O8N1S1	-0.443191	0.707692	0.5	1.4375
C16H23O9N1	-0.996294	0.0548286	0.5625	1.4375
C16H24O10	-0.957746	0.185725	0.625	1.5
C16H24O10S1	-0.997924	0.0410255	0.625	1.5
C16H24O11	-0.985767	0.107537	0.6875	1.5
C16H24O2	0.81631	0.392032	0.125	1.5
C16H24O3S1	0.768948	0.441561	0.1875	1.5
C16H24O4	0.802232	0.407292	0.25	1.5
C16H24O4S1	0.717405	0.49066	0.25	1.5
C16H24O5	-0.957913	0.185356	0.3125	1.5
C16H24O5S1	0.730654	0.47843	0.3125	1.5
C16H24O6	-0.861331	0.339262	0.375	1.5
C16H24O6N2	0.441307	0.70903	0.375	1.5
C16H24O6S1	0.541168	0.635965	0.375	1.5
C16H24O7	-0.746721	0.463254	0.4375	1.5
C16H24O7N2	-0.500783	0.666091	0.4375	1.5
C16H24O7S1	0.65909	0.541883	0.4375	1.5
C16H24O8	-0.827673	0.379329	0.5	1.5
C16H24O8N2	-0.933697	0.233127	0.5	1.5
C16H24O8S1	-0.533209	0.641972	0.5	1.5
C16H24O9	0.276999	0.82132	0.5625	1.5
C16H24O9N2	-0.999163	0.0260501	0.5625	1.5
C16H24O9S1	-0.887438	0.304966	0.5625	1.5
C16H25O10N1	-0.941099	0.21959	0.625	1.5625
C16H25O4N1	0.999254	0.0245848	0.25	1.5625
C16H25O5N1	-0.895453	0.293704	0.3125	1.5625
C16H25O6N1	-0.729068	0.479908	0.375	1.5625
C16H25O6N1S1	0.866953	0.33215	0.375	1.5625
C16H25O6N3	-0.84388	0.360532	0.375	1.5625
C16H25O6N5S2	-0.307003	0.801348	0.375	1.5625
C16H25O7N1	-0.999997	0.00165562	0.4375	1.5625
C16H25O7N1S1	0.774275	0.436229	0.4375	1.5625
C16H25O8N1	-0.800355	0.409289	0.5	1.5625
C16H25O9N1	-0.977037	0.136693	0.5625	1.5625
C16H26O10	-0.915404	0.263743	0.625	1.625
C16H26O10S1	-0.942814	0.216338	0.625	1.625
C16H26O2	0.966138	0.166143	0.125	1.625
C16H26O3	-0.406037	0.733821	0.1875	1.625
C16H26O4	0.130416	0.916738	0.25	1.625
C16H26O4S1	0.789483	0.420698	0.25	1.625
C16H26O5	-0.2756	0.822247	0.3125	1.625
C16H26O5S1	0.824073	0.383393	0.3125	1.625
C16H26O6	-0.898083	0.28992	0.375	1.625
C16H26O6S1	0.600324	0.590077	0.375	1.625
C16H26O7	-0.902428	0.283565	0.4375	1.625
C16H26O7N2	0.999405	0.0219705	0.4375	1.625
C16H26O7S1	0.92959	0.240323	0.4375	1.625
C16H26O8	-0.136123	0.913072	0.5	1.625
C16H26O8S1	-0.959951	0.18078	0.5	1.625
C16H26O9	-0.861895	0.338555	0.5625	1.625
C16H26O9S1	-0.641482	0.556639	0.5625	1.625
C16H27O6N1	0.985462	0.108687	0.375	1.6875
C16H27O7N1	-0.91001	0.272147	0.4375	1.6875
C16H27O7N1S1	-0.0404801	0.974223	0.4375	1.6875
C16H27O8N1	-0.997746	0.0427516	0.5	1.6875
C16H28O3	0.515265	0.655387	0.1875	1.75
C16H28O5	-0.984578	0.111949	0.3125	1.75
C16H28O5S1	0.675921	0.527492	0.3125	1.75
C16H28O6	-0.998238	0.0377966	0.375	1.75
C16H28O6S1	0.840028	0.365077	0.375	1.75
C16H28O7	-0.903059	0.282631	0.4375	1.75
C16H28O7S1	0.369623	0.758974	0.4375	1.75
C16H28O8	0.199812	0.871933	0.5	1.75
C16H28O9	-0.730276	0.478783	0.5625	1.75
C16H30O11	0.97132	0.152836	0.6875	1.875
C16H30O5	0.818841	0.389234	0.3125	1.875
C16H30O6	-0.9941	0.0691897	0.375	1.875
C16H32O3S1	-0.526376	0.647101	0.1875	2
C16H34O4S1	-0.0857062	0.945371	0.25	2.125
C16H34O5S1	0.0987616	0.937024	0.3125	2.125
C16H34O6S1	-0.547277	0.631329	0.375	2.125
C16H8O6	-0.742379	0.467395	0.375	0.5
C16H8O7	-0.85972	0.341277	0.4375	0.5
C16H8O8	-0.863691	0.336294	0.5	0.5
C16H9O6N1	-0.652732	0.547246	0.375	0.5625
C16H9O7N1	-0.566211	0.616817	0.4375	0.5625
C16H9O8N1	-0.96637	0.16557	0.5	0.5625
C17H10O10	-0.954615	0.192535	0.5882	0.5882
C17H10O5	-0.0929527	0.940739	0.2941	0.5882
C17H10O6	-0.69578	0.510118	0.3529	0.5882
C17H10O7	0.0366684	0.976651	0.4118	0.5882
C17H10O8	-0.724522	0.484121	0.4706	0.5882
C17H10O9	-0.765795	0.444691	0.5294	0.5882
C17H11O4N1	-0.331135	0.785137	0.2353	0.6471
C17H11O5N1	-0.6741	0.529063	0.2941	0.6471
C17H11O6N1	-0.813619	0.394988	0.3529	0.6471
C17H11O7N1	-0.588534	0.59941	0.4118	0.6471
C17H11O8N1	-0.697594	0.508508	0.4706	0.6471
C17H11O9N1	-0.984621	0.111793	0.5294	0.6471
C17H12O10	-0.790086	0.420072	0.5882	0.7059
C17H12O11	-0.899344	0.28809	0.6471	0.7059
C17H12O3	-0.950306	0.20154	0.1765	0.7059
C17H12O4	0.919153	0.257749	0.2353	0.7059
C17H12O5	-0.867473	0.331485	0.2941	0.7059
C17H12O5N2	0.954043	0.193753	0.2941	0.7059
C17H12O6	-0.599233	0.590945	0.3529	0.7059
C17H12O6N2	-0.760439	0.449967	0.3529	0.7059
C17H12O7	-0.62862	0.567241	0.4118	0.7059
C17H12O7N2	-0.913784	0.266293	0.4118	0.7059
C17H12O8	-0.735533	0.473864	0.4706	0.7059
C17H12O8N2	-0.607936	0.583995	0.4706	0.7059
C17H12O9	-0.584413	0.60265	0.5294	0.7059
C17H13O10N1	-0.950853	0.200418	0.5882	0.7647
C17H13O4N1	-0.889615	0.301945	0.2353	0.7647
C17H13O5N1	-0.782952	0.427426	0.2941	0.7647
C17H13O6N1	-0.578529	0.607254	0.3529	0.7647
C17H13O7N1	-0.644108	0.554457	0.4118	0.7647
C17H13O8N1	-0.857308	0.344271	0.4706	0.7647
C17H13O9N1	-0.732681	0.476538	0.5294	0.7647
C17H14O10	0.344643	0.776	0.5882	0.8235
C17H14O11	-0.98774	0.0997911	0.6471	0.8235
C17H14O12	-0.997374	0.0461462	0.7059	0.8235
C17H14O3	0.763019	0.447433	0.1765	0.8235
C17H14O4	0.858089	0.343304	0.2353	0.8235
C17H14O4N2	0.956174	0.189173	0.2353	0.8235
C17H14O5N2	-0.716273	0.491693	0.2941	0.8235
C17H14O6	-0.946748	0.208695	0.3529	0.8235
C17H14O6N2	-0.125929	0.919618	0.3529	0.8235
C17H14O6S1	0.999858	0.0107229	0.3529	0.8235
C17H14O7	-0.646718	0.552282	0.4118	0.8235
C17H14O7N2	-0.774361	0.436143	0.4118	0.8235
C17H14O7S1	0.878457	0.317147	0.4118	0.8235
C17H14O8	-0.525362	0.64786	0.4706	0.8235
C17H14O8N2	-0.816347	0.391992	0.4706	0.8235
C17H14O8S1	-0.968663	0.159794	0.4706	0.8235
C17H14O9	0.408456	0.732134	0.5294	0.8235
C17H14O9N2	-0.998039	0.0398782	0.5294	0.8235
C17H14O9S1	-0.475306	0.684675	0.5294	0.8235
C17H15O10N1	-0.938016	0.225323	0.5882	0.8824
C17H15O11N1	-0.720595	0.487738	0.6471	0.8824
C17H15O4N1	-0.997654	0.0436116	0.2353	0.8824
C17H15O5N1	0.239652	0.845933	0.2941	0.8824
C17H15O6N1	-0.825825	0.38142	0.3529	0.8824
C17H15O7N1	-0.729646	0.47937	0.4118	0.8824
C17H15O8N1	-0.909269	0.273283	0.4706	0.8824
C17H15O9N1	-0.63325	0.563441	0.5294	0.8824
C17H16O10	-0.928491	0.242213	0.5882	0.9412
C17H16O10N2	-0.997877	0.0414936	0.5882	0.9412
C17H16O10S1	0.592862	0.595996	0.5882	0.9412
C17H16O11	-0.0493224	0.968588	0.6471	0.9412
C17H16O12	-0.545554	0.632639	0.7059	0.9412
C17H16O13	-0.702869	0.503804	0.7647	0.9412
C17H16O3	0.0486695	0.969004	0.1765	0.9412
C17H16O4	0.798832	0.410903	0.2353	0.9412
C17H16O5N2	0.555435	0.625103	0.2941	0.9412
C17H16O5S1	0.995743	0.0587604	0.2941	0.9412
C17H16O6	0.32698	0.787938	0.3529	0.9412
C17H16O6N2	0.355179	0.76884	0.3529	0.9412
C17H16O6S1	0.865198	0.334385	0.3529	0.9412
C17H16O7	-0.673968	0.529177	0.4118	0.9412
C17H16O7N2	-0.709468	0.497871	0.4118	0.9412
C17H16O7S1	0.758108	0.452248	0.4118	0.9412
C17H16O8	0.500804	0.666076	0.4706	0.9412
C17H16O8N2	-0.992347	0.0788137	0.4706	0.9412
C17H16O8S1	0.840231	0.364839	0.4706	0.9412
C17H16O9	-0.700027	0.506343	0.5294	0.9412
C17H16O9N2	-0.978425	0.132482	0.5294	0.9412
C17H16O9S1	-0.854551	0.347664	0.5294	0.9412
C17H17O10N1	-0.779983	0.430456	0.5882	1
C17H17O11N1	0.979055	0.130526	0.6471	1
C17H17O4N1	-0.835759	0.370057	0.2353	1
C17H17O5N1	0.589694	0.598496	0.2941	1
C17H17O6N1	-0.445937	0.705741	0.3529	1
C17H17O7N1	-0.806983	0.402198	0.4118	1
C17H17O7N1S1	0.628465	0.567367	0.4118	1
C17H17O8N1	-0.768127	0.442378	0.4706	1
C17H17O8N1S1	-0.52853	0.645487	0.4706	1
C17H17O9N1	-0.966793	0.16452	0.5294	1
C17H17O9N1S1	-0.999845	0.0111964	0.5294	1
C17H18O10	-0.709924	0.497458	0.5882	1.0588
C17H18O10N2	-0.998916	0.0296437	0.5882	1.0588
C17H18O10S1	-0.85859	0.342682	0.5882	1.0588
C17H18O11	-0.953756	0.194361	0.6471	1.0588
C17H18O12	0.118478	0.924397	0.7059	1.0588
C17H18O13	0.079683	0.949218	0.7647	1.0588
C17H18O2	0.689597	0.515576	0.1176	1.0588
C17H18O3	0.0991545	0.936772	0.1765	1.0588
C17H18O4	0.28916	0.813248	0.2353	1.0588
C17H18O5	0.242202	0.844261	0.2941	1.0588
C17H18O5N2	0.97818	0.133234	0.2941	1.0588
C17H18O5S1	-0.796511	0.413353	0.2941	1.0588
C17H18O6	0.256278	0.835008	0.3529	1.0588
C17H18O6N2	-0.705598	0.501357	0.3529	1.0588
C17H18O6S1	-0.453147	0.700602	0.3529	1.0588
C17H18O7	-0.571816	0.612479	0.4118	1.0588
C17H18O7N2	-0.80743	0.401715	0.4118	1.0588
C17H18O7N2S1	0.99046	0.0880043	0.4118	1.0588
C17H18O7S1	0.966298	0.165749	0.4118	1.0588
C17H18O8	-0.764334	0.446136	0.4706	1.0588
C17H18O8N2	-0.856755	0.344954	0.4706	1.0588
C17H18O8N2S1	0.124825	0.920326	0.4706	1.0588
C17H18O8S1	0.864195	0.335657	0.4706	1.0588
C17H18O9	0.549935	0.629305	0.5294	1.0588
C17H18O9N2	-0.867496	0.331456	0.5294	1.0588
C17H18O9N2S1	-0.217172	0.860634	0.5294	1.0588
C17H18O9S1	-0.265028	0.829237	0.5294	1.0588
C17H19O10N1	-0.914682	0.264882	0.5882	1.1176
C17H19O11N1	-0.469205	0.689081	0.6471	1.1176
C17H19O3P1	0.701228	0.505271	0.1765	1.1176
C17H19O4N1	-0.994986	0.0637755	0.2353	1.1176
C17H19O5N1	-0.93681	0.227528	0.2941	1.1176
C17H19O6N1	-0.802642	0.406854	0.3529	1.1176
C17H19O7N1	-0.816562	0.391754	0.4118	1.1176
C17H19O7N1S1	0.951716	0.198636	0.4118	1.1176
C17H19O8N1	-0.831977	0.374419	0.4706	1.1176
C17H19O8N1S1	-0.348728	0.773227	0.4706	1.1176
C17H19O9N1	-0.917204	0.260881	0.5294	1.1176
C17H19O9N1S1	-0.587099	0.60054	0.5294	1.1176
C17H20O10	-0.969086	0.158708	0.5882	1.1765
C17H20O10N2	-0.849876	0.353353	0.5882	1.1765
C17H20O10S1	-0.834558	0.371446	0.5882	1.1765
C17H20O11	0.598093	0.59185	0.6471	1.1765
C17H20O11S1	0.773291	0.437218	0.6471	1.1765
C17H20O12	-0.903746	0.281612	0.7059	1.1765
C17H20O13	-0.674454	0.528758	0.7647	1.1765
C17H20O2	0.3992	0.738576	0.1176	1.1765
C17H20O3	-0.646765	0.552243	0.1765	1.1765
C17H20O4	0.837468	0.36807	0.2353	1.1765
C17H20O4N2	-0.0613784	0.960901	0.2353	1.1765
C17H20O5	0.966363	0.165587	0.2941	1.1765
C17H20O5N2	-0.996982	0.0494719	0.2941	1.1765
C17H20O5S1	0.51619	0.6547	0.2941	1.1765
C17H20O6	0.681628	0.522544	0.3529	1.1765
C17H20O6N2	-0.429211	0.717583	0.3529	1.1765
C17H20O6S1	0.890695	0.300436	0.3529	1.1765
C17H20O7	0.171935	0.889996	0.4118	1.1765
C17H20O7N2	-0.582702	0.603991	0.4118	1.1765
C17H20O7N2S1	-0.180973	0.884151	0.4118	1.1765
C17H20O7S1	0.755196	0.455083	0.4118	1.1765
C17H20O8	-0.287255	0.814515	0.4706	1.1765
C17H20O8N2	-0.677507	0.526121	0.4706	1.1765
C17H20O8N2S1	-0.971822	0.151486	0.4706	1.1765
C17H20O8S1	0.903733	0.281632	0.4706	1.1765
C17H20O9	-0.951311	0.199474	0.5294	1.1765
C17H20O9N2	-0.95901	0.182907	0.5294	1.1765
C17H20O9N2S1	0.898877	0.288768	0.5294	1.1765
C17H20O9S1	-0.988892	0.0949765	0.5294	1.1765
C17H21O10N1	-0.995298	0.0617626	0.5882	1.2353
C17H21O11N1	-0.656407	0.544151	0.6471	1.2353
C17H21O2N3	-0.281801	0.818136	0.1176	1.2353
C17H21O3N1	0.992985	0.0754507	0.1765	1.2353
C17H21O4N1	0.207004	0.867258	0.2353	1.2353
C17H21O5N1	-0.931352	0.237261	0.2941	1.2353
C17H21O6N1	-0.769695	0.440817	0.3529	1.2353
C17H21O6N1S1	-0.731009	0.4781	0.3529	1.2353
C17H21O7N1	-0.742798	0.466996	0.4118	1.2353
C17H21O7N1S1	-0.913292	0.267062	0.4118	1.2353
C17H21O8N1	-0.735771	0.47364	0.4706	1.2353
C17H21O8N1S1	0.512774	0.657236	0.4706	1.2353
C17H21O9N1	-0.930135	0.23938	0.5294	1.2353
C17H21O9N1S1	-0.760177	0.450224	0.5294	1.2353
C17H22O10	-0.969938	0.156495	0.5882	1.2941
C17H22O10N2	-0.999702	0.0155472	0.5882	1.2941
C17H22O10S1	-0.513911	0.656392	0.5882	1.2941
C17H22O11	-0.999977	0.00436299	0.6471	1.2941
C17H22O11S1	-0.538383	0.638071	0.6471	1.2941
C17H22O12	-0.999974	0.00462837	0.7059	1.2941
C17H22O2	0.711372	0.496148	0.1176	1.2941
C17H22O3	-0.110417	0.929563	0.1765	1.2941
C17H22O4	0.965947	0.166615	0.2353	1.2941
C17H22O4N2	0.615037	0.578282	0.2353	1.2941
C17H22O4S1	0.730226	0.478829	0.2353	1.2941
C17H22O5	0.251456	0.838181	0.2941	1.2941
C17H22O5N2	0.164624	0.894718	0.2941	1.2941
C17H22O5S1	0.707481	0.499663	0.2941	1.2941
C17H22O6	-0.626061	0.569332	0.3529	1.2941
C17H22O6N2	0.389858	0.745048	0.3529	1.2941
C17H22O6S1	-0.932003	0.236119	0.3529	1.2941
C17H22O7	-0.582798	0.603916	0.4118	1.2941
C17H22O7N2	0.108249	0.930951	0.4118	1.2941
C17H22O7S1	0.728714	0.480237	0.4118	1.2941
C17H22O8	-0.733616	0.475662	0.4706	1.2941
C17H22O8N2	-0.843388	0.361115	0.4706	1.2941
C17H22O8N2S1	-0.9287	0.241854	0.4706	1.2941
C17H22O8S1	0.524275	0.648673	0.4706	1.2941
C17H22O9	-0.89393	0.295875	0.5294	1.2941
C17H22O9N2	-0.9767	0.137696	0.5294	1.2941
C17H22O9N2S1	-0.917938	0.259706	0.5294	1.2941
C17H22O9S1	-0.40894	0.731797	0.5294	1.2941
C17H23O10N1	-0.975326	0.141713	0.5882	1.3529
C17H23O11N1	-0.785291	0.425026	0.6471	1.3529
C17H23O4N1	-0.901056	0.285587	0.2353	1.3529
C17H23O5N1	-0.959853	0.181004	0.2941	1.3529
C17H23O6N1	-0.94076	0.220227	0.3529	1.3529
C17H23O6N1S1	0.867812	0.331051	0.3529	1.3529
C17H23O7N1	-0.883278	0.310662	0.4118	1.3529
C17H23O7N1S1	0.994031	0.069592	0.4118	1.3529
C17H23O8N1	-0.780561	0.429867	0.4706	1.3529
C17H23O8N1S1	0.854387	0.347866	0.4706	1.3529
C17H23O9N1	-0.916479	0.262038	0.5294	1.3529
C17H23O9N1S1	0.721962	0.486481	0.5294	1.3529
C17H23O9N3	-0.844327	0.360001	0.5294	1.3529
C17H24O10	-0.321541	0.791598	0.5882	1.4118
C17H24O10S1	-0.990746	0.0866738	0.5882	1.4118
C17H24O11	-0.998549	0.0342975	0.6471	1.4118
C17H24O11S1	-0.134285	0.914252	0.6471	1.4118
C17H24O12	-0.884376	0.309169	0.7059	1.4118
C17H24O2	-0.937153	0.226902	0.1176	1.4118
C17H24O3	0.794674	0.415284	0.1765	1.4118
C17H24O3S1	0.847555	0.356147	0.1765	1.4118
C17H24O4	0.543613	0.634112	0.2353	1.4118
C17H24O4S1	0.721739	0.486686	0.2353	1.4118
C17H24O5	0.826567	0.380581	0.2941	1.4118
C17H24O5S1	0.950238	0.20168	0.2941	1.4118
C17H24O6	0.997182	0.047802	0.3529	1.4118
C17H24O6N2	0.710225	0.497187	0.3529	1.4118
C17H24O6S1	0.545245	0.632874	0.3529	1.4118
C17H24O7	0.45316	0.700593	0.4118	1.4118
C17H24O7N2	0.0688699	0.956121	0.4118	1.4118
C17H24O7S1	0.727942	0.480954	0.4118	1.4118
C17H24O8	-0.939091	0.22334	0.4706	1.4118
C17H24O8N2	-0.931179	0.237563	0.4706	1.4118
C17H24O8S1	-0.215877	0.861478	0.4706	1.4118
C17H24O9	-0.864888	0.334779	0.5294	1.4118
C17H24O9N2	-0.79719	0.412638	0.5294	1.4118
C17H24O9S1	-0.0126524	0.991945	0.5294	1.4118
C17H25O10N1	-0.623734	0.57123	0.5882	1.4706
C17H25O11N1	-0.36422	0.762671	0.6471	1.4706
C17H25O4N1	0.413429	0.728662	0.2353	1.4706
C17H25O5N1	-0.199548	0.872105	0.2941	1.4706
C17H25O6N1	-0.608982	0.583156	0.3529	1.4706
C17H25O6N1S1	0.647413	0.551702	0.3529	1.4706
C17H25O7N1	-0.81971	0.388269	0.4118	1.4706
C17H25O7N1S1	0.991443	0.0833445	0.4118	1.4706
C17H25O8N1	-0.790589	0.419549	0.4706	1.4706
C17H25O8N1S1	0.141195	0.909811	0.4706	1.4706
C17H25O9N1	-0.974558	0.143912	0.5294	1.4706
C17H25O9N1S1	0.168921	0.891944	0.5294	1.4706
[truncated: 2,833 more rows]

## Sheet: FCO2
MolForm	r	p	O.C	H.C
C10H10O1	0.537366	0.638839	0.1	1
C10H10O1N2	0.586152	0.601284	0.1	1
C10H10O2	-0.998437	0.0355995	0.2	1
C10H10O2N2	-0.584448	0.602622	0.2	1
C10H10O2S1	-0.946185	0.209805	0.2	1
C10H10O3	-0.995572	0.0599346	0.3	1
C10H10O3N2	0.854145	0.348162	0.3	1
C10H10O3S1	-0.0884547	0.943614	0.3	1
C10H10O4	-0.733883	0.475412	0.4	1
C10H10O4N2	-0.661963	0.539447	0.4	1
C10H10O4N2S1	-0.89203	0.298561	0.4	1
C10H10O4S1	0.909687	0.272643	0.4	1
C10H10O5N2	-0.912541	0.268235	0.5	1
C10H10O5S1	0.958326	0.184437	0.5	1
C10H10O6	-0.999319	0.0234956	0.6	1
C10H10O6N2	-0.179987	0.884789	0.6	1
C10H10O6S1	-0.682071	0.522159	0.6	1
C10H10O7	-0.938339	0.224728	0.7	1
C10H10O7S1	0.906156	0.278007	0.7	1
C10H11O2N1	-0.891762	0.298939	0.2	1.1
C10H11O3N1	0.682015	0.522208	0.3	1.1
C10H11O3N1S1	-0.0985722	0.937145	0.3	1.1
C10H11O4N1	-0.766157	0.444333	0.4	1.1
C10H11O4N1S1	0.239188	0.846237	0.4	1.1
C10H11O5N1	-0.571481	0.612738	0.5	1.1
C10H11O5N1S1	-0.494699	0.670556	0.5	1.1
C10H11O6N1	0.34341	0.776836	0.6	1.1
C10H11O7N1	-0.229599	0.852517	0.7	1.1
C10H12O1	0.261946	0.831272	0.1	1.2
C10H12O2	-0.284865	0.816102	0.2	1.2
C10H12O2N2	-0.982872	0.117995	0.2	1.2
C10H12O2S1	-0.336023	0.781836	0.2	1.2
C10H12O3N2	-0.935182	0.230472	0.3	1.2
C10H12O3S1	0.416763	0.726329	0.3	1.2
C10H12O4	-0.72298	0.485543	0.4	1.2
C10H12O4N2	-0.966298	0.165748	0.4	1.2
C10H12O4S1	0.802213	0.407311	0.4	1.2
C10H12O5	-0.931139	0.237632	0.5	1.2
C10H12O5N2	-0.807359	0.401792	0.5	1.2
C10H12O5N2S1	-0.206447	0.86762	0.5	1.2
C10H12O5S1	0.699658	0.506671	0.5	1.2
C10H12O6	0.0499755	0.968171	0.6	1.2
C10H12O6N2	-0.233674	0.84985	0.6	1.2
C10H12O6S1	0.831547	0.374911	0.6	1.2
C10H12O7	-0.862266	0.33809	0.7	1.2
C10H12O7S1	-0.841844	0.36294	0.7	1.2
C10H13O1N1	-0.737123	0.472368	0.1	1.3
C10H13O2N1	0.0254036	0.983826	0.2	1.3
C10H13O3N1	0.968178	0.161033	0.3	1.3
C10H13O4N1	-0.311934	0.798046	0.4	1.3
C10H13O4N1S1	-0.519952	0.651899	0.4	1.3
C10H13O5N1	-0.997434	0.045615	0.5	1.3
C10H13O5N1S1	-0.0132756	0.991548	0.5	1.3
C10H13O6N1	-0.930917	0.238019	0.6	1.3
C10H13O6N1S1	0.507803	0.660915	0.6	1.3
C10H13O7N1	-0.853657	0.348759	0.7	1.3
C10H14O1	-0.983905	0.114373	0.1	1.4
C10H14O2	-0.968751	0.15957	0.2	1.4
C10H14O2N2	-0.984838	0.111001	0.2	1.4
C10H14O3	-0.0782637	0.950125	0.3	1.4
C10H14O3N2	-0.896187	0.292652	0.3	1.4
C10H14O3S1	0.835814	0.369993	0.3	1.4
C10H14O4	-0.290767	0.812179	0.4	1.4
C10H14O4N2	-0.991464	0.0832381	0.4	1.4
C10H14O4S1	0.748014	0.462015	0.4	1.4
C10H14O5	0.375758	0.754765	0.5	1.4
C10H14O5N2	-0.83039	0.376236	0.5	1.4
C10H14O5S1	0.932654	0.234974	0.5	1.4
C10H14O6	-0.996966	0.0496026	0.6	1.4
C10H14O6S1	0.805036	0.404291	0.6	1.4
C10H14O7	0.568737	0.614864	0.7	1.4
C10H14O7S1	-0.522103	0.650295	0.7	1.4
C10H15O1N1	-0.834024	0.372063	0.1	1.5
C10H15O2N1	-0.711597	0.495945	0.2	1.5
C10H15O3N1	-0.973348	0.147308	0.3	1.5
C10H15O4N1	-0.817241	0.391005	0.4	1.5
C10H15O4N1S1	0.345569	0.775372	0.4	1.5
C10H15O5N1	-0.984873	0.110873	0.5	1.5
C10H15O5N1S1	-0.90511	0.279576	0.5	1.5
C10H15O6N1	-0.820932	0.386908	0.6	1.5
C10H15O7N1	-0.683418	0.520985	0.7	1.5
C10H15O8N1	0.229961	0.85228	0.8	1.5
C10H16O1	-0.772505	0.438007	0.1	1.6
C10H16O2	0.954347	0.193106	0.2	1.6
C10H16O3	-0.998804	0.0311381	0.3	1.6
C10H16O3S1	0.807769	0.40135	0.3	1.6
C10H16O4N2	0.528667	0.645384	0.4	1.6
C10H16O4S1	0.22109	0.858077	0.4	1.6
C10H16O5	-0.953222	0.195489	0.5	1.6
C10H16O5N2	-0.991262	0.0842213	0.5	1.6
C10H16O5S1	0.448814	0.703693	0.5	1.6
C10H16O6	-0.988276	0.0975783	0.6	1.6
C10H16O6S1	-0.0353373	0.977499	0.6	1.6
C10H16O7	-0.766478	0.444015	0.7	1.6
C10H16O7S1	-0.566855	0.61632	0.7	1.6
C10H17O10N1S1	-0.834538	0.371469	1	1.7
C10H17O3N1	-0.327808	0.78738	0.3	1.7
C10H17O4N1	-0.914734	0.264801	0.4	1.7
C10H17O5N1	-0.990704	0.0868713	0.5	1.7
C10H17O7N1	-0.96907	0.158749	0.7	1.7
C10H17O7N1S1	-0.771206	0.439308	0.7	1.7
C10H17O8N1S1	-0.90849	0.274472	0.8	1.7
C10H18O2	-0.294173	0.809912	0.2	1.8
C10H18O3	0.0572478	0.963535	0.3	1.8
C10H18O3S1	0.993901	0.0703471	0.3	1.8
C10H18O4	0.554483	0.625832	0.4	1.8
C10H18O4S1	0.83503	0.3709	0.4	1.8
C10H18O5S1	0.247758	0.840612	0.5	1.8
C10H18O6	-0.974507	0.144056	0.6	1.8
C10H18O6S1	-0.229119	0.852831	0.6	1.8
C10H18O7	0.737512	0.472001	0.7	1.8
C10H18O7S1	-0.715164	0.492704	0.7	1.8
C10H20O4	0.98133	0.123211	0.4	2
C10H20O4S1	0.751973	0.458204	0.4	2
C10H20O6S1	-0.294467	0.809715	0.6	2
C10H20O9S1	-0.337904	0.780564	0.9	2
C10H6O3	-0.984758	0.111292	0.3	0.6
C10H6O4	-0.999928	0.00763986	0.4	0.6
C10H6O4S1	-0.324427	0.789657	0.4	0.6
C10H6O5	0.51813	0.653257	0.5	0.6
C10H6O5N2	-0.924634	0.248742	0.5	0.6
C10H6O6	0.0469455	0.970103	0.6	0.6
C10H6O6N2	0.293844	0.810131	0.6	0.6
C10H6O7	-0.326176	0.78848	0.7	0.6
C10H7O2N1	0.993719	0.0713921	0.2	0.7
C10H7O3N1	-0.45262	0.700979	0.3	0.7
C10H7O3N1S1	-0.919274	0.257553	0.3	0.7
C10H7O4N1	-0.285127	0.815929	0.4	0.7
C10H7O4N1S1	0.611734	0.580945	0.4	0.7
C10H7O5N1	-0.8539	0.348462	0.5	0.7
C10H7O5N1S1	-0.678844	0.524963	0.5	0.7
C10H7O6N1	-0.796582	0.413278	0.6	0.7
C10H8O1	-0.930235	0.239206	0.1	0.8
C10H8O2	-0.876184	0.320162	0.2	0.8
C10H8O2N2	-0.965787	0.167007	0.2	0.8
C10H8O2S1	0.923193	0.25114	0.2	0.8
C10H8O3	-0.998815	0.0309983	0.3	0.8
C10H8O3N2	0.33995	0.77918	0.3	0.8
C10H8O3S1	0.541115	0.636005	0.3	0.8
C10H8O4	-0.702499	0.504135	0.4	0.8
C10H8O4N2	-0.357807	0.767049	0.4	0.8
C10H8O4N2S1	0.139765	0.910731	0.4	0.8
C10H8O4S1	0.808943	0.40008	0.4	0.8
C10H8O5	0.551226	0.62832	0.5	0.8
C10H8O5N2	-0.91618	0.262513	0.5	0.8
C10H8O5S1	0.832299	0.374049	0.5	0.8
C10H8O6	-0.878875	0.31659	0.6	0.8
C10H8O6S1	0.372954	0.75669	0.6	0.8
C10H8O7	-0.98052	0.125862	0.7	0.8
C10H9O1N1	-0.852145	0.350602	0.1	0.9
C10H9O2N1	0.618474	0.575502	0.2	0.9
C10H9O2N1S1	-0.647754	0.551417	0.2	0.9
C10H9O3N1	0.34455	0.776063	0.3	0.9
C10H9O3N1S1	0.500478	0.666315	0.3	0.9
C10H9O4N1	-0.596534	0.593089	0.4	0.9
C10H9O4N1S1	-0.173158	0.889206	0.4	0.9
C10H9O5N1	-0.711854	0.495712	0.5	0.9
C10H9O5N1S1	0.585213	0.602021	0.5	0.9
C10H9O6N1	-0.766037	0.444451	0.6	0.9
C10H9O7N1	-0.610412	0.582008	0.7	0.9
C11H10O1	-0.390775	0.744414	0.0909	0.9091
C11H10O2	0.556741	0.624103	0.1818	0.9091
C11H10O2N2	-0.91943	0.257301	0.1818	0.9091
C11H10O2S1	0.583546	0.60333	0.1818	0.9091
C11H10O3	-0.713239	0.494455	0.2727	0.9091
C11H10O3N2	-0.967548	0.162629	0.2727	0.9091
C11H10O3S1	0.370073	0.758665	0.2727	0.9091
C11H10O4	0.0254255	0.983812	0.3636	0.9091
C11H10O4N2	-0.999984	0.00355435	0.3636	0.9091
C11H10O4N2S1	0.6471	0.551963	0.3636	0.9091
C11H10O4S1	0.663371	0.53825	0.3636	0.9091
C11H10O5	-0.945984	0.210199	0.4545	0.9091
C11H10O5N2	-0.887719	0.304578	0.4545	0.9091
C11H10O5N2S1	0.409881	0.73114	0.4545	0.9091
C11H10O5S1	0.579887	0.606193	0.4545	0.9091
C11H10O6	0.052217	0.966742	0.5455	0.9091
C11H10O6N2	-0.999971	0.00480687	0.5455	0.9091
C11H10O6S1	0.947603	0.206997	0.5455	0.9091
C11H10O7	-0.338455	0.780191	0.6364	0.9091
C11H10O7S1	0.549072	0.629962	0.6364	0.9091
C11H10O8	-0.960211	0.18019	0.7273	0.9091
C11H11O2N1	-0.969896	0.156603	0.1818	1
C11H11O3N1	-0.890434	0.300802	0.2727	1
C11H11O3N1S1	0.815841	0.392549	0.2727	1
C11H11O4N1	-0.870427	0.327686	0.3636	1
C11H11O4N1S1	0.997912	0.0411427	0.3636	1
C11H11O5N1	-0.784181	0.426167	0.4545	1
C11H11O5N1S1	0.76369	0.446772	0.4545	1
C11H11O6N1	0.431639	0.715871	0.5455	1
C11H11O6N1S1	0.984329	0.112852	0.5455	1
C11H11O7N1	-0.899022	0.288558	0.6364	1
C11H11O8N1	-0.608962	0.583172	0.7273	1
C11H12O1	-0.993915	0.0702635	0.0909	1.0909
C11H12O2	-0.981492	0.122672	0.1818	1.0909
C11H12O2N2	0.535001	0.640622	0.1818	1.0909
C11H12O2S1	-0.603642	0.587431	0.1818	1.0909
C11H12O3	0.593105	0.595804	0.2727	1.0909
C11H12O3N2	-0.993928	0.0701916	0.2727	1.0909
C11H12O3S1	0.863151	0.336975	0.2727	1.0909
C11H12O4	0.1673	0.89299	0.3636	1.0909
C11H12O4N2	0.0728658	0.953571	0.3636	1.0909
C11H12O4N2S1	0.947752	0.2067	0.3636	1.0909
C11H12O4S1	0.668537	0.533841	0.3636	1.0909
C11H12O5	-0.956338	0.188817	0.4545	1.0909
C11H12O5N2	-0.617611	0.576201	0.4545	1.0909
C11H12O5S1	0.697213	0.508846	0.4545	1.0909
C11H12O6	-0.999088	0.0271914	0.5455	1.0909
C11H12O6N2	-0.95068	0.200774	0.5455	1.0909
C11H12O6S1	0.860439	0.340379	0.5455	1.0909
C11H12O7	-0.992482	0.0781138	0.6364	1.0909
C11H12O7S1	0.665587	0.536362	0.6364	1.0909
C11H12O8	-0.68687	0.517968	0.7273	1.0909
C11H13O1N1	0.981202	0.123633	0.0909	1.1818
C11H13O2N1	-0.925371	0.247507	0.1818	1.1818
C11H13O3N1	-0.99957	0.0186725	0.2727	1.1818
C11H13O4N1	0.182461	0.883187	0.3636	1.1818
C11H13O4N1S1	0.809532	0.399441	0.3636	1.1818
C11H13O5N1	-0.99162	0.0824739	0.4545	1.1818
C11H13O5N1S1	0.671648	0.531173	0.4545	1.1818
C11H13O6N1	-0.872946	0.324413	0.5455	1.1818
C11H13O6N1S1	0.999992	0.00249355	0.5455	1.1818
C11H13O7N1	-0.969105	0.158657	0.6364	1.1818
C11H13O7N1S1	-0.930965	0.237936	0.6364	1.1818
C11H13O8N1	-0.783902	0.426453	0.7273	1.1818
C11H14O1	0.0142929	0.990901	0.0909	1.2727
C11H14O2	-0.992711	0.0769129	0.1818	1.2727
C11H14O2N2	-0.971223	0.153096	0.1818	1.2727
C11H14O2S1	-0.31153	0.798317	0.1818	1.2727
C11H14O3N2	-0.941705	0.218445	0.2727	1.2727
C11H14O3S1	0.665664	0.536297	0.2727	1.2727
C11H14O4	-0.00347175	0.99779	0.3636	1.2727
C11H14O4N2	-0.969945	0.156475	0.3636	1.2727
C11H14O4N2S1	0.277831	0.820769	0.3636	1.2727
C11H14O4S1	0.997659	0.0435716	0.3636	1.2727
C11H14O5	-0.890753	0.300356	0.4545	1.2727
C11H14O5N2	-0.997072	0.0487305	0.4545	1.2727
C11H14O5N2S1	0.644348	0.554257	0.4545	1.2727
C11H14O5S1	0.77427	0.436234	0.4545	1.2727
C11H14O6	-0.956769	0.187876	0.5455	1.2727
C11H14O6N2	-0.864261	0.335574	0.5455	1.2727
C11H14O6S1	-0.602762	0.588134	0.5455	1.2727
C11H14O7	-0.99131	0.0839881	0.6364	1.2727
C11H14O7S1	-0.8617	0.3388	0.6364	1.2727
C11H14O8	-0.882256	0.312047	0.7273	1.2727
C11H15O1N1	-0.72013	0.488164	0.0909	1.3636
C11H15O2N1	-0.993926	0.0702041	0.1818	1.3636
C11H15O3N1	-0.983838	0.114611	0.2727	1.3636
C11H15O4N1	-0.974805	0.143208	0.3636	1.3636
C11H15O4N1S1	0.675169	0.528141	0.3636	1.3636
C11H15O5N1	-0.909983	0.272189	0.4545	1.3636
C11H15O5N1S1	0.956496	0.188472	0.4545	1.3636
C11H15O6N1	-0.964004	0.17133	0.5455	1.3636
C11H15O6N1S1	0.983665	0.115224	0.5455	1.3636
C11H15O7N1	-0.998386	0.0361727	0.6364	1.3636
C11H15O7P1	0.967463	0.162843	0.6364	1.3636
C11H16O1	-0.873871	0.323204	0.0909	1.4545
C11H16O2	-0.794918	0.415027	0.1818	1.4545
C11H16O2N2	-0.998634	0.0332743	0.1818	1.4545
C11H16O3	0.96879	0.159468	0.2727	1.4545
C11H16O3N2	-0.663708	0.537963	0.2727	1.4545
C11H16O3S1	0.827337	0.37971	0.2727	1.4545
C11H16O4	0.0305	0.98058	0.3636	1.4545
C11H16O4N2	-0.993571	0.0722253	0.3636	1.4545
C11H16O4S1	-0.9066	0.277337	0.3636	1.4545
C11H16O5	-0.779313	0.431136	0.4545	1.4545
C11H16O5N2	-0.468921	0.689286	0.4545	1.4545
C11H16O5S1	0.988294	0.0975025	0.4545	1.4545
C11H16O5S2	0.865432	0.334087	0.4545	1.4545
C11H16O6	-0.288371	0.813772	0.5455	1.4545
C11H16O6N2	-0.948086	0.206032	0.5455	1.4545
C11H16O6S1	-0.705562	0.501389	0.5455	1.4545
C11H16O7	-0.985623	0.108081	0.6364	1.4545
C11H16O7S1	-0.860502	0.340301	0.6364	1.4545
C11H16O8	-0.883598	0.310228	0.7273	1.4545
C11H16O8S1	-0.368039	0.760059	0.7273	1.4545
C11H17O2N1	-0.993993	0.0698142	0.1818	1.5455
C11H17O3N1	-0.993725	0.0713547	0.2727	1.5455
C11H17O4N1	0.455299	0.699065	0.3636	1.5455
C11H17O5N1	-0.839008	0.366272	0.4545	1.5455
C11H17O5N1S1	-0.0662035	0.957823	0.4545	1.5455
C11H17O6N1	-0.89256	0.297815	0.5455	1.5455
C11H17O7N1	-0.891834	0.298838	0.6364	1.5455
C11H18O1	-0.791013	0.419108	0.0909	1.6364
C11H18O2	0.958435	0.184194	0.1818	1.6364
C11H18O3	0.963812	0.17179	0.2727	1.6364
C11H18O3N2	0.433094	0.714844	0.2727	1.6364
C11H18O4	0.519414	0.652301	0.3636	1.6364
C11H18O4N2	0.0217561	0.986149	0.3636	1.6364
C11H18O4S1	0.98968	0.0915411	0.3636	1.6364
C11H18O5	-0.0209673	0.986651	0.4545	1.6364
C11H18O5S1	0.995049	0.0633743	0.4545	1.6364
C11H18O6	-0.852746	0.349871	0.5455	1.6364
C11H18O6S1	0.0977176	0.937692	0.5455	1.6364
C11H18O7	-0.977589	0.135032	0.6364	1.6364
C11H18O7S1	-0.886321	0.306506	0.6364	1.6364
C11H18O8	-0.984122	0.113596	0.7273	1.6364
C11H19O3N1	-0.197072	0.873713	0.2727	1.7273
C11H19O4N1	0.84809	0.355506	0.3636	1.7273
C11H19O5N1	-0.853393	0.349082	0.4545	1.7273
C11H19O6N1	-0.9997	0.0155886	0.5455	1.7273
C11H20O2	-0.249873	0.839222	0.1818	1.8182
C11H20O4	0.0255799	0.983714	0.3636	1.8182
C11H20O4S1	0.55099	0.628501	0.3636	1.8182
C11H20O5S1	0.402255	0.736453	0.4545	1.8182
C11H20O6	-0.806135	0.403111	0.5455	1.8182
C11H20O6S1	0.235761	0.848483	0.5455	1.8182
C11H20O7	0.2507	0.838678	0.6364	1.8182
C11H20O7S1	-0.686371	0.518405	0.6364	1.8182
C11H22O4	-0.587645	0.600111	0.3636	2
C11H6O4	-0.971857	0.151391	0.3636	0.5455
C11H6O5	-0.985236	0.109528	0.4545	0.5455
C11H6O6	-0.893182	0.296934	0.5455	0.5455
C11H6O6S1	-0.893678	0.296233	0.5455	0.5455
C11H6O7	-0.734864	0.474492	0.6364	0.5455
C11H7O4N1	-0.948385	0.205433	0.3636	0.6364
C11H7O5N1	-0.835123	0.370793	0.4545	0.6364
C11H7O6N1	-0.594063	0.595046	0.5455	0.6364
C11H7O7N1	-0.978524	0.132175	0.6364	0.6364
C11H8O2	-0.979307	0.129734	0.1818	0.7273
C11H8O2N2	0.892155	0.298385	0.1818	0.7273
C11H8O3	-0.976076	0.139536	0.2727	0.7273
C11H8O3N2	-0.461324	0.694749	0.2727	0.7273
C11H8O3S1	-0.593551	0.595451	0.2727	0.7273
C11H8O4	-0.931889	0.23632	0.3636	0.7273
C11H8O4N2	-0.891181	0.299755	0.3636	0.7273
C11H8O4S1	-0.501294	0.665715	0.3636	0.7273
C11H8O5	0.442307	0.70832	0.4545	0.7273
C11H8O5N2	-0.9917	0.082079	0.4545	0.7273
C11H8O5S1	-0.339982	0.779158	0.4545	0.7273
C11H8O6	-0.996505	0.0532372	0.5455	0.7273
C11H8O6N2	-0.986082	0.106338	0.5455	0.7273
C11H8O6S1	0.122228	0.921992	0.5455	0.7273
C11H8O7	-0.968632	0.159875	0.6364	0.7273
C11H9O2N1	-0.954394	0.193005	0.1818	0.8182
C11H9O3N1	-0.953808	0.194251	0.2727	0.8182
C11H9O3N1S1	-0.743561	0.466271	0.2727	0.8182
C11H9O4N1	-0.904533	0.280439	0.3636	0.8182
C11H9O4N1S1	-0.941342	0.219131	0.3636	0.8182
C11H9O5N1	-0.826358	0.380817	0.4545	0.8182
C11H9O5N1S1	0.191774	0.877152	0.4545	0.8182
C11H9O6N1	-0.869069	0.329438	0.5455	0.8182
C11H9O7N1	-0.98739	0.101206	0.6364	0.8182
C12H10O2	0.70473	0.502136	0.1667	0.8333
C12H10O2N2	0.122284	0.921956	0.1667	0.8333
C12H10O3	-0.769397	0.441114	0.25	0.8333
C12H10O3N2	-0.679723	0.5242	0.25	0.8333
C12H10O3S1	0.620028	0.574242	0.25	0.8333
C12H10O4	-0.286961	0.81471	0.3333	0.8333
C12H10O4N2	-0.995871	0.0578748	0.3333	0.8333
C12H10O4N2S1	0.762638	0.447808	0.3333	0.8333
C12H10O4S1	0.957684	0.185862	0.3333	0.8333
C12H10O5	-0.82574	0.381516	0.4167	0.8333
C12H10O5N2	-0.909856	0.272383	0.4167	0.8333
C12H10O5N2S1	-0.991712	0.0820204	0.4167	0.8333
C12H10O5S1	0.649057	0.550327	0.4167	0.8333
C12H10O6	-0.736586	0.472874	0.5	0.8333
C12H10O6N2	-0.777642	0.432832	0.5	0.8333
C12H10O6S1	0.356935	0.767643	0.5	0.8333
C12H10O7	-0.977551	0.135149	0.5833	0.8333
C12H10O7N2	0.482153	0.67971	0.5833	0.8333
C12H10O7S1	0.909807	0.272459	0.5833	0.8333
C12H10O8	-0.606034	0.585519	0.6667	0.8333
C12H11O2N1	-0.410489	0.730716	0.1667	0.9167
C12H11O3N1	-0.019483	0.987596	0.25	0.9167
C12H11O3N1S1	0.988631	0.0960859	0.25	0.9167
C12H11O4N1	-0.904658	0.280253	0.3333	0.9167
C12H11O4N1S1	-0.47237	0.686797	0.3333	0.9167
C12H11O5N1	-0.822996	0.384601	0.4167	0.9167
C12H11O5N1S1	-0.992813	0.0763718	0.4167	0.9167
C12H11O6N1	-0.998075	0.0395088	0.5	0.9167
C12H11O6N1S1	0.571696	0.612572	0.5	0.9167
C12H11O7N1	-0.615782	0.577681	0.5833	0.9167
C12H11O8N1	-0.430446	0.716712	0.6667	0.9167
C12H12O1	-0.3349	0.782595	0.0833	1
C12H12O2	-0.97669	0.137724	0.1667	1
C12H12O2N2	0.994723	0.0654332	0.1667	1
C12H12O3	-0.94705	0.208096	0.25	1
C12H12O3N2	-0.911477	0.269885	0.25	1
C12H12O3S1	-0.76527	0.445211	0.25	1
C12H12O3S2	0.00457014	0.997091	0.25	1
C12H12O4	-0.994974	0.063856	0.3333	1
C12H12O4N2	0.287516	0.814341	0.3333	1
C12H12O4N2S1	0.999969	0.00497702	0.3333	1
C12H12O4S1	0.336407	0.781577	0.3333	1
C12H12O5	-0.783963	0.42639	0.4167	1
C12H12O5N2	-0.987724	0.0998558	0.4167	1
C12H12O5N2S1	0.0737063	0.953034	0.4167	1
C12H12O5S1	-0.947249	0.207701	0.4167	1
C12H12O6	-0.926863	0.244989	0.5	1
C12H12O6N2	-0.992675	0.0771017	0.5	1
C12H12O6S1	0.631984	0.564481	0.5	1
C12H12O7	-0.999419	0.02171	0.5833	1
C12H12O7S1	0.524259	0.648685	0.5833	1
C12H12O8	-0.887024	0.305538	0.6667	1
C12H12O8S1	0.123637	0.921088	0.6667	1
C12H13O2N1	0.373549	0.756282	0.1667	1.0833
C12H13O3N1	0.648741	0.550592	0.25	1.0833
C12H13O4N1	-0.951071	0.19997	0.3333	1.0833
C12H13O4N1S1	0.583266	0.603549	0.3333	1.0833
C12H13O5N1	-0.883955	0.309742	0.4167	1.0833
C12H13O5N1S1	0.782764	0.427619	0.4167	1.0833
C12H13O6N1	-0.915951	0.262877	0.5	1.0833
C12H13O6N1S1	-0.155732	0.900453	0.5	1.0833
C12H13O7N1	-0.996018	0.0568346	0.5833	1.0833
C12H13O7N1S1	0.773836	0.436671	0.5833	1.0833
C12H13O8N1	-0.455503	0.698919	0.6667	1.0833
C12H14O1	0.40969	0.731274	0.0833	1.1667
C12H14O2	0.977449	0.135455	0.1667	1.1667
C12H14O2N2	-0.986502	0.104716	0.1667	1.1667
C12H14O3	-0.992196	0.0795872	0.25	1.1667
C12H14O3N2	-0.805449	0.403848	0.25	1.1667
C12H14O3S1	0.769999	0.440514	0.25	1.1667
C12H14O4N2	-0.973837	0.145946	0.3333	1.1667
C12H14O4N2S1	0.761713	0.448717	0.3333	1.1667
C12H14O4S1	0.729618	0.479396	0.3333	1.1667
C12H14O5	0.0398879	0.9746	0.4167	1.1667
C12H14O5N2	-0.987969	0.0988518	0.4167	1.1667
C12H14O5S1	-0.778009	0.43246	0.4167	1.1667
C12H14O6N2	-0.935069	0.230675	0.5	1.1667
C12H14O6N2S1	0.999996	0.00177895	0.5	1.1667
C12H14O6S1	0.619031	0.575051	0.5	1.1667
C12H14O7	-0.0900419	0.9426	0.5833	1.1667
C12H14O7S1	0.408126	0.732365	0.5833	1.1667
C12H14O8	-0.941013	0.219752	0.6667	1.1667
C12H14O8S1	0.32706	0.787884	0.6667	1.1667
C12H14O9	-0.715951	0.491987	0.75	1.1667
C12H15O1N1	-0.978443	0.132426	0.0833	1.25
C12H15O2N1	-0.995234	0.0621772	0.1667	1.25
C12H15O3N1	-0.342551	0.777418	0.25	1.25
C12H15O4N1	-0.899309	0.28814	0.3333	1.25
C12H15O4N1S1	0.38792	0.746388	0.3333	1.25
C12H15O5N1	-0.944292	0.213496	0.4167	1.25
C12H15O5N1S1	0.869691	0.328637	0.4167	1.25
C12H15O6N1	-0.781262	0.429153	0.5	1.25
C12H15O6N1S1	-0.548951	0.630054	0.5	1.25
C12H15O7N1	-0.997311	0.0466965	0.5833	1.25
C12H15O7N1S1	-0.0409594	0.973917	0.5833	1.25
C12H15O8N1	-0.855676	0.346283	0.6667	1.25
C12H16O1	0.0813336	0.948164	0.0833	1.3333
C12H16O2	0.164056	0.895084	0.1667	1.3333
C12H16O2N2	-0.541344	0.635831	0.1667	1.3333
C12H16O2S1	0.563589	0.61884	0.1667	1.3333
C12H16O3	0.680411	0.523603	0.25	1.3333
C12H16O3S1	0.704564	0.502285	0.25	1.3333
C12H16O4	0.970653	0.154614	0.3333	1.3333
C12H16O4N2	-0.960941	0.178518	0.3333	1.3333
C12H16O4S1	0.839369	0.365849	0.3333	1.3333
C12H16O5	-0.820068	0.387872	0.4167	1.3333
C12H16O5N2	-0.921697	0.253606	0.4167	1.3333
C12H16O5S1	0.758084	0.452271	0.4167	1.3333
C12H16O6	-0.841637	0.363184	0.5	1.3333
C12H16O6N2	-0.968763	0.159539	0.5	1.3333
C12H16O6N2S1	-0.463101	0.693474	0.5	1.3333
C12H16O6S1	0.709586	0.497764	0.5	1.3333
C12H16O7	-0.954263	0.193286	0.5833	1.3333
C12H16O7S1	0.560937	0.620882	0.5833	1.3333
C12H16O8	-0.993645	0.0718095	0.6667	1.3333
C12H16O8S1	-0.234074	0.849588	0.6667	1.3333
C12H16O9	-0.632148	0.564347	0.75	1.3333
C12H16O9S1	-0.368346	0.759849	0.75	1.3333
C12H17O2N1	-0.117475	0.92504	0.1667	1.4167
C12H17O3N1	-0.663773	0.537908	0.25	1.4167
C12H17O4N1	-0.724698	0.483959	0.3333	1.4167
C12H17O4N1S1	0.967677	0.162303	0.3333	1.4167
C12H17O5N1	-0.946429	0.209324	0.4167	1.4167
C12H17O5N1S1	0.978721	0.131566	0.4167	1.4167
C12H17O5N3	0.36485	0.762241	0.4167	1.4167
C12H17O6N1	-0.893756	0.296121	0.5	1.4167
C12H17O6N1S1	-0.591949	0.596717	0.5	1.4167
C12H17O7N1	-0.994785	0.0650456	0.5833	1.4167
C12H17O8N1	-0.547081	0.631478	0.6667	1.4167
C12H18O1	-0.60495	0.586386	0.0833	1.5
C12H18O2	-0.720692	0.487648	0.1667	1.5
C12H18O2N2	-0.999941	0.00693173	0.1667	1.5
C12H18O3	-0.945726	0.210705	0.25	1.5
C12H18O3N2	-0.890427	0.300812	0.25	1.5
C12H18O3S1	0.830475	0.376138	0.25	1.5
C12H18O4	-0.726863	0.481955	0.3333	1.5
C12H18O4N2	-0.99113	0.0848551	0.3333	1.5
C12H18O4S1	-0.835844	0.369957	0.3333	1.5
C12H18O5	0.0380074	0.975798	0.4167	1.5
C12H18O5N2	-0.840471	0.364556	0.4167	1.5
C12H18O5S1	0.74861	0.461443	0.4167	1.5
C12H18O6	0.976048	0.139616	0.5	1.5
C12H18O6N2	-0.999845	0.0111981	0.5	1.5
C12H18O6S1	0.708687	0.498576	0.5	1.5
C12H18O7	-0.952319	0.197383	0.5833	1.5
C12H18O7S1	-0.278545	0.820296	0.5833	1.5
C12H18O8	-0.991327	0.0839077	0.6667	1.5
C12H18O8S1	0.128845	0.917746	0.6667	1.5
C12H18O9	-0.74406	0.465795	0.75	1.5
C12H18O9S1	-0.4706	0.688075	0.75	1.5
C12H19O3N1	-0.999973	0.00465704	0.25	1.5833
C12H19O4N1	-0.667161	0.535018	0.3333	1.5833
C12H19O5N1	0.486009	0.676905	0.4167	1.5833
C12H19O5N1S1	-0.60535	0.586066	0.4167	1.5833
C12H19O5N3	-0.760183	0.450219	0.4167	1.5833
C12H19O6N1	-0.854647	0.347547	0.5	1.5833
C12H19O6N1S1	-0.696377	0.509588	0.5	1.5833
C12H19O7N1	-0.964869	0.169246	0.5833	1.5833
C12H19O8N1	-0.682068	0.522162	0.6667	1.5833
C12H20O1	-0.964934	0.169089	0.0833	1.6667
C12H20O4N2	-0.9999	0.00898866	0.3333	1.6667
C12H20O4S1	0.840018	0.365088	0.3333	1.6667
C12H20O5N2	-0.00772519	0.995082	0.4167	1.6667
C12H20O5S1	0.826025	0.381194	0.4167	1.6667
C12H20O6	-0.799403	0.410299	0.5	1.6667
C12H20O6N2	-0.989561	0.0920676	0.5	1.6667
C12H20O6S1	0.626429	0.569032	0.5	1.6667
C12H20O7	0.302125	0.804608	0.5833	1.6667
C12H20O7S1	-0.466813	0.690804	0.5833	1.6667
C12H20O8	-0.968385	0.160507	0.6667	1.6667
C12H20O8S1	0.512082	0.657749	0.6667	1.6667
C12H20O9S1	-0.718111	0.490014	0.75	1.6667
C12H21O4N1	-0.977988	0.133822	0.3333	1.75
C12H21O5N1	-0.367265	0.760589	0.4167	1.75
C12H21O6N1	-0.984796	0.111154	0.5	1.75
C12H22O2	0.906246	0.27787	0.1667	1.8333
C12H22O4	-0.698315	0.507867	0.3333	1.8333
C12H22O4S1	0.952127	0.197783	0.3333	1.8333
C12H22O5	-0.936701	0.227725	0.4167	1.8333
C12H22O5S1	0.802374	0.40714	0.4167	1.8333
C12H22O6	0.99428	0.0681213	0.5	1.8333
C12H22O6S1	0.674769	0.528486	0.5	1.8333
C12H22O7	0.127786	0.918426	0.5833	1.8333
C12H22O7S1	-0.952174	0.197684	0.5833	1.8333
C12H22O8	0.549598	0.629562	0.6667	1.8333
C12H22O9	0.990177	0.0893053	0.75	1.8333
C12H23O6N1S1	0.0330287	0.978969	0.5	1.9167
C12H24O10S1	-0.373469	0.756337	0.8333	2
C12H24O6	0.53152	0.643242	0.5	2
C12H26O4S1	0.85983	0.341139	0.3333	2.1667
C12H27O2N2S2P1	-0.961539	0.177135	0.1667	2.25
C12H6O5	-0.485864	0.67701	0.4167	0.5
C12H6O5N2	-0.837632	0.367879	0.4167	0.5
C12H6O6	-0.914324	0.265445	0.5	0.5
C12H7O3N1	0.945967	0.210233	0.25	0.5833
C12H7O4N1	-0.876053	0.320335	0.3333	0.5833
C12H7O5N1	-0.727712	0.481167	0.4167	0.5833
C12H7O6N1	-0.984152	0.113489	0.5	0.5833
C12H7O7N1	-0.6995	0.506813	0.5833	0.5833
C12H8O2N2	-0.862657	0.337598	0.1667	0.6667
C12H8O3	-0.94813	0.205943	0.25	0.6667
C12H8O3N2	-0.829166	0.377631	0.25	0.6667
C12H8O4	0.665377	0.536542	0.3333	0.6667
C12H8O4N2	0.225421	0.855248	0.3333	0.6667
C12H8O4S1	0.637985	0.559537	0.3333	0.6667
C12H8O5	0.43044	0.716717	0.4167	0.6667
C12H8O5N2	-0.974134	0.145112	0.4167	0.6667
C12H8O5S1	-0.344655	0.775992	0.4167	0.6667
C12H8O6	-0.762342	0.448099	0.5	0.6667
C12H8O6N2	-0.794427	0.415542	0.5	0.6667
C12H8O6S1	-0.989262	0.0933795	0.5	0.6667
C12H8O7	-0.924079	0.249668	0.5833	0.6667
C12H8O8	-0.952239	0.197549	0.6667	0.6667
C12H9O2N1	-0.60865	0.583423	0.1667	0.75
C12H9O3N1	-0.830207	0.376444	0.25	0.75
C12H9O3N1S1	-0.999431	0.0214725	0.25	0.75
C12H9O4N1	-0.994816	0.0648477	0.3333	0.75
C12H9O4N1S1	-0.797307	0.412514	0.3333	0.75
C12H9O5N1	-0.999997	0.0014927	0.4167	0.75
C12H9O5N1S1	-0.104146	0.933578	0.4167	0.75
C12H9O6N1	-0.967519	0.162703	0.5	0.75
C12H9O6N1S1	-0.916978	0.261242	0.5	0.75
C12H9O7N1	-0.983044	0.117402	0.5833	0.75
C12H9O8N1	-0.959541	0.181709	0.6667	0.75
C13H10O1	-0.252595	0.837432	0.0769	0.7692
C13H10O2N2	-0.566701	0.616439	0.1538	0.7692
C13H10O3	-0.301117	0.805281	0.2308	0.7692
C13H10O3N2	-0.12711	0.91886	0.2308	0.7692
C13H10O3N2S1	0.119806	0.923546	0.2308	0.7692
C13H10O4	-0.684865	0.519722	0.3077	0.7692
C13H10O4N2	-0.435797	0.712933	0.3077	0.7692
C13H10O4S1	0.19478	0.875201	0.3077	0.7692
C13H10O5	-0.80802	0.401078	0.3846	0.7692
C13H10O5N2	-0.992326	0.0789183	0.3846	0.7692
C13H10O5N2S1	-0.931222	0.237488	0.3846	0.7692
C13H10O5S1	0.76502	0.445458	0.3846	0.7692
C13H10O6	-0.0566835	0.963895	0.4615	0.7692
C13H10O6N2	-0.906886	0.276906	0.4615	0.7692
C13H10O6S1	-0.0209205	0.986681	0.4615	0.7692
C13H10O7	-0.964429	0.170309	0.5385	0.7692
C13H10O7N2	-0.999454	0.0210426	0.5385	0.7692
C13H10O7S1	-0.997032	0.0490567	0.5385	0.7692
C13H10O8	-0.86948	0.328907	0.6154	0.7692
C13H10O8N2	-0.544357	0.633547	0.6154	0.7692
C13H10O9	-0.995986	0.0570608	0.6923	0.7692
C13H11O2N1	-0.599402	0.59081	0.1538	0.8462
C13H11O3N1	-0.956749	0.187919	0.2308	0.8462
C13H11O4N1	-0.480134	0.681176	0.3077	0.8462
C13H11O4N1S1	0.946915	0.208363	0.3077	0.8462
C13H11O5N1	-0.872229	0.325347	0.3846	0.8462
C13H11O5N1S1	-0.730086	0.47896	0.3846	0.8462
C13H11O6N1	-0.966805	0.164491	0.4615	0.8462
C13H11O6N1S1	-0.835029	0.370902	0.4615	0.8462
C13H11O7N1	-0.927835	0.243336	0.5385	0.8462
C13H11O7N1S1	-0.694792	0.510993	0.5385	0.8462
C13H11O8N1	-0.99522	0.0622731	0.6154	0.8462
C13H12O2N2	-0.969657	0.157229	0.1538	0.9231
C13H12O3	0.976833	0.137302	0.2308	0.9231
C13H12O3N2	0.285394	0.815751	0.2308	0.9231
C13H12O3S1	0.738144	0.471405	0.2308	0.9231
C13H12O4	0.0781002	0.950229	0.3077	0.9231
C13H12O4N2	-0.910336	0.271646	0.3077	0.9231
C13H12O4S1	0.714624	0.493196	0.3077	0.9231
C13H12O5	-0.741219	0.468496	0.3846	0.9231
C13H12O5N2	-0.930688	0.238418	0.3846	0.9231
C13H12O5S1	0.788086	0.422145	0.3846	0.9231
C13H12O6	0.0739341	0.952889	0.4615	0.9231
C13H12O6N2	-0.973104	0.147985	0.4615	0.9231
C13H12O6N2S1	-0.923674	0.250342	0.4615	0.9231
C13H12O6S1	0.848354	0.355188	0.4615	0.9231
C13H12O7	-0.748536	0.461515	0.5385	0.9231
C13H12O7N2	-0.966617	0.164957	0.5385	0.9231
C13H12O7S1	0.113462	0.927612	0.5385	0.9231
C13H12O8	-0.0821687	0.947631	0.6154	0.9231
C13H12O8S1	-0.827775	0.379213	0.6154	0.9231
C13H12O9	-0.77081	0.439703	0.6923	0.9231
C13H12O9S1	0.753623	0.456609	0.6923	0.9231
C13H13O2N1	0.71281	0.494844	0.1538	1
C13H13O3N1	-0.76381	0.446653	0.2308	1
C13H13O4N1	-0.888051	0.304119	0.3077	1
C13H13O4N1S1	-0.999127	0.0266027	0.3077	1
C13H13O5N1	-0.697662	0.508447	0.3846	1
C13H13O5N1S1	-0.767806	0.442697	0.3846	1
C13H13O6N1	-0.87797	0.317795	0.4615	1
C13H13O6N1S1	0.969344	0.15804	0.4615	1
C13H13O7N1	-0.990472	0.0879527	0.5385	1
C13H13O7N1S1	-0.336988	0.781183	0.5385	1
C13H13O8N1	-0.730309	0.478752	0.6154	1
C13H13O9N1	0.672305	0.530609	0.6923	1
C13H14O1	0.747096	0.462895	0.0769	1.0769
C13H14O10	-0.798169	0.411604	0.7692	1.0769
C13H14O2	0.184243	0.882033	0.1538	1.0769
C13H14O2N2	-0.63778	0.559706	0.1538	1.0769
C13H14O3	-0.246685	0.841318	0.2308	1.0769
C13H14O3N2	-0.673751	0.529364	0.2308	1.0769
C13H14O3S1	0.753423	0.456803	0.2308	1.0769
C13H14O4	-0.967575	0.16256	0.3077	1.0769
C13H14O4N2	-0.922557	0.252192	0.3077	1.0769
C13H14O4N2S1	-0.792983	0.417054	0.3077	1.0769
C13H14O4S1	0.998887	0.0300436	0.3077	1.0769
C13H14O5	0.168486	0.892224	0.3846	1.0769
C13H14O5N2	-0.940176	0.22132	0.3846	1.0769
C13H14O5N2S1	0.904671	0.280233	0.3846	1.0769
C13H14O5S1	0.75911	0.451269	0.3846	1.0769
C13H14O6	-0.864024	0.335873	0.4615	1.0769
C13H14O6N2	0.415327	0.727335	0.4615	1.0769
C13H14O6N2S1	-0.998975	0.0288252	0.4615	1.0769
C13H14O6S1	-0.671184	0.531572	0.4615	1.0769
C13H14O7	0.53357	0.6417	0.5385	1.0769
C13H14O7N2	-0.984983	0.110468	0.5385	1.0769
C13H14O7S1	0.450753	0.702311	0.5385	1.0769
C13H14O8	0.572706	0.611788	0.6154	1.0769
C13H14O8N2	-0.907406	0.276119	0.6154	1.0769
C13H14O8S1	-0.246028	0.841749	0.6154	1.0769
C13H14O9	-0.805879	0.403387	0.6923	1.0769
C13H14O9S1	-0.763282	0.447173	0.6923	1.0769
C13H15O2N1	-0.146289	0.906534	0.1538	1.1538
C13H15O3N1	0.670838	0.531869	0.2308	1.1538
C13H15O4N1	-0.734197	0.475118	0.3077	1.1538
C13H15O4N1S1	0.808716	0.400326	0.3077	1.1538
C13H15O5N1	-0.0127881	0.991859	0.3846	1.1538
C13H15O5N1S1	0.962123	0.175777	0.3846	1.1538
C13H15O6N1	-0.86798	0.330836	0.4615	1.1538
C13H15O6N1S1	0.0112942	0.99281	0.4615	1.1538
C13H15O7N1	-0.944668	0.212769	0.5385	1.1538
C13H15O7N1S1	0.605094	0.586271	0.5385	1.1538
C13H15O8N1	-0.893935	0.295867	0.6154	1.1538
C13H15O8N1S1	-0.842164	0.362563	0.6154	1.1538
C13H15O9N1	-0.988816	0.0952995	0.6923	1.1538
C13H16O1	-0.288861	0.813447	0.0769	1.2308
C13H16O1N2	-0.589034	0.599017	0.0769	1.2308
C13H16O2	0.2021	0.870447	0.1538	1.2308
C13H16O2N2	-0.93571	0.229521	0.1538	1.2308
C13H16O3	0.980271	0.126666	0.2308	1.2308
C13H16O3N2	-0.999751	0.0142005	0.2308	1.2308
C13H16O3S1	-0.798721	0.411021	0.2308	1.2308
C13H16O4	-0.95389	0.194078	0.3077	1.2308
C13H16O4N2	-0.906319	0.27776	0.3077	1.2308
C13H16O4S1	0.737957	0.471581	0.3077	1.2308
C13H16O5	-0.616985	0.576707	0.3846	1.2308
C13H16O5N2	-0.965135	0.168601	0.3846	1.2308
C13H16O5S1	0.769737	0.440775	0.3846	1.2308
C13H16O6	-0.739688	0.469946	0.4615	1.2308
C13H16O6N2	-0.870258	0.327904	0.4615	1.2308
C13H16O6S1	0.635097	0.56192	0.4615	1.2308
C13H16O7	-0.906207	0.277929	0.5385	1.2308
C13H16O7N2S1	-0.590183	0.598111	0.5385	1.2308
C13H16O7S1	0.56864	0.61494	0.5385	1.2308
C13H16O8	0.429008	0.717726	0.6154	1.2308
C13H16O8S1	0.319176	0.793188	0.6154	1.2308
C13H16O9	-0.90181	0.284477	0.6923	1.2308
C13H16O9S1	0.399823	0.738143	0.6923	1.2308
C13H17O2N1	-0.999061	0.0275873	0.1538	1.3077
C13H17O3N1	0.479892	0.681352	0.2308	1.3077
C13H17O4N1	-0.585909	0.601476	0.3077	1.3077
C13H17O4N1S1	-0.358249	0.766748	0.3077	1.3077
C13H17O5N1	-0.714882	0.49296	0.3846	1.3077
C13H17O5N1S1	0.0468126	0.970187	0.3846	1.3077
C13H17O6N1	-0.878371	0.317261	0.4615	1.3077
C13H17O6N1S1	0.562712	0.619516	0.4615	1.3077
C13H17O7N1	-0.960479	0.179576	0.5385	1.3077
C13H17O7N1S1	-0.0860732	0.945136	0.5385	1.3077
C13H17O8N1	-0.994587	0.0662699	0.6154	1.3077
C13H17O8N1S1	0.388894	0.745714	0.6154	1.3077
C13H17O9N1	-0.486625	0.676455	0.6923	1.3077
C13H18O1	0.983048	0.117388	0.0769	1.3846
C13H18O10	-0.855028	0.34708	0.7692	1.3846
C13H18O2	0.181268	0.88396	0.1538	1.3846
C13H18O2N2	0.993289	0.0737974	0.1538	1.3846
C13H18O3	0.432481	0.715276	0.2308	1.3846
C13H18O3N2	-0.856719	0.344998	0.2308	1.3846
C13H18O3S1	0.793493	0.416521	0.2308	1.3846
C13H18O4	-0.183207	0.882704	0.3077	1.3846
C13H18O4N2	-0.881491	0.313081	0.3077	1.3846
C13H18O4S1	0.792144	0.41793	0.3077	1.3846
C13H18O5	-0.843563	0.360908	0.3846	1.3846
C13H18O5N2	-0.879003	0.316419	0.3846	1.3846
C13H18O5S1	-0.717858	0.490246	0.3846	1.3846
C13H18O6	-0.786165	0.424127	0.4615	1.3846
C13H18O6N2	-0.94961	0.202959	0.4615	1.3846
C13H18O6S1	-0.845422	0.358698	0.4615	1.3846
C13H18O7	-0.937394	0.226462	0.5385	1.3846
C13H18O7S1	0.81827	0.389867	0.5385	1.3846
C13H18O7S2	0.953306	0.195314	0.5385	1.3846
C13H18O8	-0.978516	0.1322	0.6154	1.3846
C13H18O8S1	-0.15577	0.900428	0.6154	1.3846
C13H18O9	-0.927397	0.244082	0.6923	1.3846
C13H18O9S1	-0.290305	0.812486	0.6923	1.3846
C13H19O2N1	-0.909584	0.272801	0.1538	1.4615
C13H19O3N1	-0.0956794	0.938995	0.2308	1.4615
C13H19O4N1	-0.605632	0.585841	0.3077	1.4615
C13H19O5N1	-0.722156	0.486302	0.3846	1.4615
C13H19O5N1S1	-0.821462	0.386317	0.3846	1.4615
C13H19O5N3	-0.878454	0.31715	0.3846	1.4615
C13H19O6N1	-0.808431	0.400634	0.4615	1.4615
C13H19O6N1S1	0.589239	0.598855	0.4615	1.4615
C13H19O7N1	-0.963415	0.172735	0.5385	1.4615
C13H19O7N1S1	0.862178	0.3382	0.5385	1.4615
C13H19O8N1	-0.877733	0.31811	0.6154	1.4615
C13H19O9N1	-0.416226	0.726705	0.6923	1.4615
C13H20O1	-0.69626	0.509692	0.0769	1.5385
C13H20O3N2	0.920218	0.256023	0.2308	1.5385
C13H20O4N2	0.362422	0.7639	0.3077	1.5385
C13H20O4S1	0.798975	0.410752	0.3077	1.5385
C13H20O5	-0.828758	0.378096	0.3846	1.5385
C13H20O5N2	-0.901327	0.285188	0.3846	1.5385
C13H20O5S1	0.854929	0.347201	0.3846	1.5385
C13H20O6	-0.837076	0.368527	0.4615	1.5385
C13H20O6N2	-0.997527	0.0447797	0.4615	1.5385
C13H20O6S1	0.854071	0.348252	0.4615	1.5385
C13H20O7	-0.802376	0.407138	0.5385	1.5385
C13H20O7S1	-0.36809	0.760024	0.5385	1.5385
C13H20O8	0.296588	0.808302	0.6154	1.5385
C13H20O8S1	-0.484775	0.677803	0.6154	1.5385
C13H20O9	-0.978616	0.131891	0.6923	1.5385
C13H20O9S1	-0.9512	0.199704	0.6923	1.5385
C13H21O4N1	-0.995547	0.0601034	0.3077	1.6154
C13H21O5N1	-0.910013	0.272142	0.3846	1.6154
C13H21O5N3	-0.705775	0.501198	0.3846	1.6154
C13H21O6N1	-0.856672	0.345056	0.4615	1.6154
C13H21O6N1S1	-0.363305	0.763296	0.4615	1.6154
C13H21O7N1	-0.989152	0.0938577	0.5385	1.6154
C13H21O8N1	-0.954654	0.192452	0.6154	1.6154
C13H22O4	0.82665	0.380487	0.3077	1.6923
C13H22O4N2	0.327001	0.787924	0.3077	1.6923
C13H22O4S1	0.902724	0.283129	0.3077	1.6923
C13H22O5N2	-0.986852	0.103349	0.3846	1.6923
C13H22O5S1	0.691753	0.513677	0.3846	1.6923
C13H22O6	-0.910989	0.270641	0.4615	1.6923
C13H22O6N2	-0.643893	0.554637	0.4615	1.6923
C13H22O6S1	0.599477	0.59075	0.4615	1.6923
C13H22O7	0.980001	0.127534	0.5385	1.6923
C13H22O7S1	-0.242817	0.843857	0.5385	1.6923
C13H22O8	-0.980176	0.126973	0.6154	1.6923
C13H22O8S1	-0.858646	0.342612	0.6154	1.6923
C13H22O9S1	-0.172733	0.88948	0.6923	1.6923
C13H23O6N1	-0.879555	0.315681	0.4615	1.7692
C13H24O4	0.887336	0.305107	0.3077	1.8462
C13H24O5	0.870313	0.327833	0.3846	1.8462
C13H24O5S1	0.782559	0.427828	0.3846	1.8462
C13H24O6	-0.999893	0.00931797	0.4615	1.8462
C13H24O6S1	0.362884	0.763584	0.4615	1.8462
C13H24O7	-0.195632	0.874649	0.5385	1.8462
C13H6O5	-0.609641	0.582627	0.3846	0.4615
C13H6O7	0.965084	0.168725	0.5385	0.4615
C13H7O4N1	-0.970281	0.155595	0.3077	0.5385
C13H7O5N1	-0.885136	0.30813	0.3846	0.5385
C13H7O6N1	-0.922347	0.252538	0.4615	0.5385
C13H8O2	0.948512	0.205177	0.1538	0.6154
C13H8O3	-0.950317	0.201519	0.2308	0.6154
C13H8O4	-0.996047	0.0566232	0.3077	0.6154
C13H8O4N2	-0.340329	0.778923	0.3077	0.6154
C13H8O4S1	-0.452263	0.701234	0.3077	0.6154
C13H8O5	-0.922062	0.253007	0.3846	0.6154
C13H8O5N2	-0.921249	0.25434	0.3846	0.6154
C13H8O5S1	-0.87438	0.322536	0.3846	0.6154
C13H8O6	-0.997648	0.0436743	0.4615	0.6154
C13H8O6N2	-0.89252	0.29787	0.4615	0.6154
C13H8O6S1	-0.287306	0.814481	0.4615	0.6154
C13H8O7	-0.881592	0.312945	0.5385	0.6154
C13H8O8	-0.936565	0.227972	0.6154	0.6154
C13H9O2N1	0.84167	0.363145	0.1538	0.6923
C13H9O3N1	-0.989268	0.0933524	0.2308	0.6923
C13H9O4N1	-0.800145	0.409511	0.3077	0.6923
C13H9O4N1S1	0.84073	0.364252	0.3077	0.6923
C13H9O5N1	-0.831161	0.375353	0.3846	0.6923
C13H9O5N1S1	-0.993846	0.0706614	0.3846	0.6923
C13H9O6N1	-0.947539	0.207124	0.4615	0.6923
C13H9O6N1S1	-0.950651	0.200834	0.4615	0.6923
C13H9O7N1	-0.89961	0.287702	0.5385	0.6923
C13H9O8N1	-0.978716	0.131581	0.6154	0.6923
C14H10O10	-0.996594	0.0525585	0.7143	0.7143
C14H10O2	-0.587277	0.6004	0.1429	0.7143
C14H10O3	-0.58095	0.605363	0.2143	0.7143
C14H10O3N2	0.98201	0.120937	0.2143	0.7143
C14H10O4	-0.876572	0.319649	0.2857	0.7143
C14H10O4N2	-0.919994	0.256387	0.2857	0.7143
C14H10O4S1	0.990221	0.0891061	0.2857	0.7143
C14H10O5	-0.950791	0.200547	0.3571	0.7143
C14H10O5N2	-0.970651	0.154619	0.3571	0.7143
C14H10O5S1	0.465369	0.691843	0.3571	0.7143
C14H10O6	0.962277	0.175418	0.4286	0.7143
C14H10O6N2	-0.285452	0.815713	0.4286	0.7143
C14H10O6S1	0.24947	0.839487	0.4286	0.7143
C14H10O7	0.422884	0.722036	0.5	0.7143
C14H10O7N2	-0.812087	0.396663	0.5	0.7143
C14H10O7S1	-0.973458	0.147003	0.5	0.7143
C14H10O8	-0.69424	0.511481	0.5714	0.7143
C14H10O8N2	-0.931069	0.237754	0.5714	0.7143
C14H10O9	-0.800237	0.409414	0.6429	0.7143
C14H11O14P1	-0.0198818	0.987342	1	0.7857
C14H11O2N1	-0.992905	0.0758802	0.1429	0.7857
C14H11O3N1	-0.945986	0.210195	0.2143	0.7857
C14H11O4N1	0.29057	0.81231	0.2857	0.7857
C14H11O4N1S1	0.525809	0.647526	0.2857	0.7857
C14H11O5N1	-0.857173	0.344438	0.3571	0.7857
C14H11O5N1S1	-0.903315	0.282253	0.3571	0.7857
C14H11O6N1	-0.841785	0.36301	0.4286	0.7857
C14H11O6N1S1	-0.801184	0.408408	0.4286	0.7857
C14H11O7N1	-0.737172	0.472321	0.5	0.7857
C14H11O7N1S1	0.997889	0.0413752	0.5	0.7857
C14H11O8N1	-0.54708	0.631478	0.5714	0.7857
C14H11O9N1	-0.982528	0.119178	0.6429	0.7857
C14H12O1	-0.494433	0.670751	0.0714	0.8571
C14H12O10	-0.99985	0.0110426	0.7143	0.8571
C14H12O2	-0.760694	0.449717	0.1429	0.8571
C14H12O2N2	-0.994255	0.0682758	0.1429	0.8571
C14H12O3	0.210369	0.865067	0.2143	0.8571
C14H12O3N2	-0.999478	0.0205784	0.2143	0.8571
C14H12O4	-0.957562	0.186133	0.2857	0.8571
C14H12O4N2	-0.600102	0.590253	0.2857	0.8571
C14H12O4S1	0.903511	0.281961	0.2857	0.8571
C14H12O5	-0.733236	0.476018	0.3571	0.8571
C14H12O5N2	-0.87251	0.324982	0.3571	0.8571
C14H12O5S1	0.477496	0.683089	0.3571	0.8571
C14H12O6	-0.669809	0.532752	0.4286	0.8571
C14H12O6N2	-0.871784	0.325926	0.4286	0.8571
C14H12O6N2S1	-0.360959	0.764899	0.4286	0.8571
C14H12O6S1	0.773158	0.437352	0.4286	0.8571
C14H12O7	0.302509	0.804352	0.5	0.8571
C14H12O7N2	-0.825323	0.381986	0.5	0.8571
C14H12O7S1	0.999792	0.0129788	0.5	0.8571
C14H12O8	-0.925737	0.246891	0.5714	0.8571
C14H12O8N2	-0.983238	0.116725	0.5714	0.8571
C14H12O8S1	0.326485	0.788272	0.5714	0.8571
C14H12O9	-0.856449	0.345331	0.6429	0.8571
C14H13O2N1	-0.999528	0.0195672	0.1429	0.9286
C14H13O3N1	-0.57612	0.609132	0.2143	0.9286
C14H13O4N1	0.986158	0.106046	0.2857	0.9286
C14H13O4N1S1	0.164646	0.894704	0.2857	0.9286
C14H13O5N1	-0.663491	0.538148	0.3571	0.9286
C14H13O5N1S1	0.703181	0.503524	0.3571	0.9286
C14H13O6N1	-0.859762	0.341223	0.4286	0.9286
C14H13O6N1S1	0.208308	0.866409	0.4286	0.9286
C14H13O7N1	-0.793572	0.416438	0.5	0.9286
C14H13O7N1S1	-0.747969	0.462058	0.5	0.9286
C14H13O8N1	-0.978197	0.133181	0.5714	0.9286
C14H13O8N1S1	0.963961	0.171434	0.5714	0.9286
C14H13O9N1	-0.404051	0.735204	0.6429	0.9286
C14H14O10	-0.961196	0.177931	0.7143	1
C14H14O2	0.373443	0.756354	0.1429	1
C14H14O2N2	-0.592537	0.596253	0.1429	1
C14H14O3	0.141458	0.909642	0.2143	1
C14H14O3N2	-0.413868	0.728355	0.2143	1
C14H14O3S1	-0.715279	0.492599	0.2143	1
C14H14O4	0.606172	0.585409	0.2857	1
C14H14O4N2	-0.962543	0.174794	0.2857	1
C14H14O4S1	0.711528	0.496007	0.2857	1
C14H14O5	0.118975	0.924078	0.3571	1
C14H14O5N2	-0.882169	0.312166	0.3571	1
C14H14O5S1	0.88941	0.302231	0.3571	1
C14H14O6	-0.794701	0.415255	0.4286	1
C14H14O6N2	-0.76866	0.441848	0.4286	1
C14H14O6N2S1	0.888175	0.303946	0.4286	1
C14H14O6S1	0.996206	0.0554752	0.4286	1
C14H14O7	-0.663475	0.538162	0.5	1
C14H14O7N2	-0.979812	0.128138	0.5	1
C14H14O7N2S1	-0.55686	0.624012	0.5	1
C14H14O7S1	0.575907	0.609298	0.5	1
C14H14O8	-0.960403	0.17975	0.5714	1
C14H14O8N2	-0.948234	0.205735	0.5714	1
C14H14O8S1	0.636618	0.560666	0.5714	1
C14H14O9	-0.95441	0.192972	0.6429	1
C14H14O9N2	-0.986891	0.103193	0.6429	1
C14H14O9S1	-0.931756	0.236553	0.6429	1
C14H15O2N1	-0.570575	0.613441	0.1429	1.0714
C14H15O3N1	-0.387486	0.746687	0.2143	1.0714
C14H15O3N3S1	0.971665	0.15191	0.2143	1.0714
C14H15O4N1	-0.994378	0.0675356	0.2857	1.0714
C14H15O4N1S1	0.991782	0.0816736	0.2857	1.0714
C14H15O5N1	-0.93973	0.222153	0.3571	1.0714
C14H15O5N1S1	0.918598	0.258645	0.3571	1.0714
C14H15O6N1	-0.864534	0.335227	0.4286	1.0714
C14H15O6N1S1	-0.266517	0.828254	0.4286	1.0714
C14H15O7N1	-0.96953	0.157557	0.5	1.0714
C14H15O7N1S1	0.50295	0.664496	0.5	1.0714
C14H15O8N1	-0.999279	0.0241775	0.5714	1.0714
C14H15O8N1S1	-0.393201	0.742735	0.5714	1.0714
C14H15O9N1	-0.984347	0.112788	0.6429	1.0714
C14H16O1	-0.874883	0.321876	0.0714	1.1429
C14H16O10	-0.0817292	0.947911	0.7143	1.1429
C14H16O11	-0.248372	0.840209	0.7857	1.1429
C14H16O2	0.301168	0.805247	0.1429	1.1429
C14H16O2N2	-0.880114	0.314932	0.1429	1.1429
C14H16O3	-0.980721	0.125208	0.2143	1.1429
C14H16O3N2	0.577685	0.607912	0.2143	1.1429
C14H16O3S1	0.980504	0.125916	0.2143	1.1429
C14H16O4	-0.765958	0.44453	0.2857	1.1429
C14H16O4N2	-0.892474	0.297935	0.2857	1.1429
C14H16O4N2S1	0.538895	0.637684	0.2857	1.1429
C14H16O4S1	0.734546	0.47479	0.2857	1.1429
C14H16O5	-0.693379	0.512242	0.3571	1.1429
C14H16O5N2	-0.0704469	0.955115	0.3571	1.1429
C14H16O5N2S1	0.992591	0.0775428	0.3571	1.1429
C14H16O5S1	0.809973	0.398963	0.3571	1.1429
C14H16O6	0.0799555	0.949044	0.4286	1.1429
C14H16O6N2	-0.857602	0.343906	0.4286	1.1429
C14H16O6N2S1	-0.0415249	0.973557	0.4286	1.1429
C14H16O6S1	0.641132	0.55693	0.4286	1.1429
C14H16O7	0.0979358	0.937552	0.5	1.1429
C14H16O7N2	-0.87194	0.325724	0.5	1.1429
C14H16O7N2S1	0.880313	0.314666	0.5	1.1429
C14H16O7S1	0.587526	0.600204	0.5	1.1429
C14H16O8	0.536582	0.63943	0.5714	1.1429
C14H16O8N2	-0.957471	0.186332	0.5714	1.1429
C14H16O8S1	0.328527	0.786896	0.5714	1.1429
C14H16O9	-0.96907	0.158749	0.6429	1.1429
C14H16O9N2	-0.909896	0.272323	0.6429	1.1429
C14H16O9S1	0.253332	0.836947	0.6429	1.1429
C14H17O10N1	-0.685909	0.51881	0.7143	1.2143
C14H17O2N1	-0.998027	0.0400004	0.1429	1.2143
C14H17O3N1	-0.999947	0.00653081	0.2143	1.2143
C14H17O4N1	-0.944336	0.213412	0.2857	1.2143
C14H17O5N1	-0.835468	0.370394	0.3571	1.2143
C14H17O5N1S1	0.28415	0.816577	0.3571	1.2143
C14H17O6N1	-0.773489	0.43702	0.4286	1.2143
C14H17O6N1S1	-0.176246	0.887209	0.4286	1.2143
C14H17O7N1	-0.843941	0.36046	0.5	1.2143
C14H17O7N1S1	-0.996431	0.053805	0.5	1.2143
C14H17O8N1	-0.988413	0.097006	0.5714	1.2143
C14H17O8N1S1	-0.0252645	0.983914	0.5714	1.2143
C14H17O9N1	-0.867656	0.331251	0.6429	1.2143
C14H18O1	0.434686	0.713719	0.0714	1.2857
C14H18O10	-0.848085	0.355512	0.7143	1.2857
C14H18O2	-0.2036	0.869472	0.1429	1.2857
C14H18O2N2	-0.892716	0.297594	0.1429	1.2857
C14H18O3	-0.964859	0.169272	0.2143	1.2857
C14H18O3N2	0.370262	0.758536	0.2143	1.2857
C14H18O3S1	0.823122	0.384461	0.2143	1.2857
C14H18O4	0.97401	0.145459	0.2857	1.2857
C14H18O4N2	-0.84213	0.362602	0.2857	1.2857
C14H18O4S1	-0.797832	0.411961	0.2857	1.2857
C14H18O5	0.999211	0.0252966	0.3571	1.2857
C14H18O5N2	-0.872987	0.32436	0.3571	1.2857
C14H18O5N2S1	0.775161	0.435338	0.3571	1.2857
C14H18O5S1	0.905344	0.279227	0.3571	1.2857
C14H18O6	-0.642552	0.555751	0.4286	1.2857
C14H18O6N2	-0.985235	0.109534	0.4286	1.2857
C14H18O6N2S1	0.641884	0.556306	0.4286	1.2857
C14H18O6S1	0.571707	0.612563	0.4286	1.2857
C14H18O7	0.973148	0.147863	0.5	1.2857
C14H18O7N2	-0.949063	0.204067	0.5	1.2857
C14H18O7N2S1	0.00330084	0.997899	0.5	1.2857
C14H18O7S1	0.625745	0.56959	0.5	1.2857
C14H18O8	-0.961581	0.177039	0.5714	1.2857
C14H18O8N2	-0.998675	0.032774	0.5714	1.2857
C14H18O8S1	0.300003	0.806024	0.5714	1.2857
C14H18O9	-0.320674	0.792182	0.6429	1.2857
C14H18O9S1	0.141094	0.909876	0.6429	1.2857
C14H19O2N1	0.353743	0.769818	0.1429	1.3571
C14H19O3N1	-0.828322	0.378592	0.2143	1.3571
C14H19O4N1	0.429774	0.717187	0.2857	1.3571
C14H19O5N1	-0.954985	0.191743	0.3571	1.3571
C14H19O6N1	-0.739418	0.470202	0.4286	1.3571
C14H19O6N1S1	-0.262	0.831236	0.4286	1.3571
C14H19O7N1	-0.884421	0.309107	0.5	1.3571
C14H19O7N1S1	0.270281	0.825767	0.5	1.3571
C14H19O7N3	-0.509538	0.659633	0.5	1.3571
C14H19O8N1	-0.968909	0.159163	0.5714	1.3571
C14H19O8N1S1	0.541401	0.635788	0.5714	1.3571
C14H19O9N1	-0.839224	0.366019	0.6429	1.3571
C14H20O1	-0.743018	0.466788	0.0714	1.4286
C14H20O10	-0.886723	0.305952	0.7143	1.4286
C14H20O10S1	-0.974133	0.145115	0.7143	1.4286
C14H20O2	0.259676	0.832768	0.1429	1.4286
C14H20O2N2	-0.765598	0.444886	0.1429	1.4286
C14H20O3	0.200362	0.871576	0.2143	1.4286
C14H20O3N2	-0.997757	0.0426433	0.2143	1.4286
C14H20O3S1	0.771634	0.438879	0.2143	1.4286
C14H20O4	-0.928649	0.241942	0.2857	1.4286
C14H20O4N2	-0.9565	0.188464	0.2857	1.4286
C14H20O4S1	-0.723018	0.485509	0.2857	1.4286
C14H20O5	-0.799133	0.410585	0.3571	1.4286
C14H20O5N2	0.0937098	0.940255	0.3571	1.4286
C14H20O5S1	0.736775	0.472695	0.3571	1.4286
C14H20O6	-0.785724	0.424581	0.4286	1.4286
C14H20O6N2	-0.914195	0.265648	0.4286	1.4286
C14H20O6S1	0.524196	0.648732	0.4286	1.4286
C14H20O7	-0.785412	0.424902	0.5	1.4286
C14H20O7S1	0.674891	0.528381	0.5	1.4286
C14H20O7S2	0.702717	0.50394	0.5	1.4286
C14H20O8	-0.938185	0.225011	0.5714	1.4286
C14H20O8N2	-0.997405	0.0458721	0.5714	1.4286
C14H20O8S1	0.412226	0.729503	0.5714	1.4286
C14H20O9	-0.976446	0.138446	0.6429	1.4286
C14H20O9S1	0.675374	0.527965	0.6429	1.4286
C14H21O2N1	0.777185	0.433294	0.1429	1.5
C14H21O4N1	-0.824742	0.38264	0.2857	1.5
C14H21O5N1	-0.665676	0.536287	0.3571	1.5
C14H21O5N1S1	-0.298927	0.806743	0.3571	1.5
C14H21O5N3	-0.279823	0.819448	0.3571	1.5
C14H21O6N1	-0.791173	0.418941	0.4286	1.5
C14H21O6N1S1	-0.535568	0.640195	0.4286	1.5
C14H21O6N3	0.530647	0.643898	0.4286	1.5
C14H21O6N5S2	-0.523574	0.649197	0.4286	1.5
C14H21O7N1	-0.846104	0.357884	0.5	1.5
C14H21O7N1S1	-0.0377387	0.975969	0.5	1.5
C14H21O7N3	-0.899093	0.288454	0.5	1.5
C14H21O8N1	-0.885076	0.308212	0.5714	1.5
C14H21O8N1S1	-0.430667	0.716557	0.5714	1.5
C14H21O9N1	-0.765329	0.445152	0.6429	1.5
C14H22O10	-0.973121	0.147937	0.7143	1.5714
C14H22O10S1	-0.655668	0.544775	0.7143	1.5714
C14H22O3S1	0.755929	0.454371	0.2143	1.5714
C14H22O4S1	0.838004	0.367446	0.2857	1.5714
C14H22O5	0.100051	0.936199	0.3571	1.5714
C14H22O5S1	0.918906	0.258148	0.3571	1.5714
C14H22O6	-0.862498	0.337797	0.4286	1.5714
C14H22O6N2	-0.962542	0.174797	0.4286	1.5714
C14H22O6S1	0.985409	0.108886	0.4286	1.5714
C14H22O7	-0.142484	0.908982	0.5	1.5714
C14H22O7N2	-0.931781	0.236509	0.5	1.5714
C14H22O7S1	-0.0741553	0.952748	0.5	1.5714
C14H22O8	-0.936983	0.227213	0.5714	1.5714
C14H22O8S1	-0.966213	0.165958	0.5714	1.5714
C14H22O9	-0.919272	0.257557	0.6429	1.5714
C14H22O9S1	-0.543132	0.634476	0.6429	1.5714
C14H23O4N1	0.127018	0.918919	0.2857	1.6429
C14H23O5N1	-0.99105	0.0852367	0.3571	1.6429
C14H23O6N1	-0.729701	0.479319	0.4286	1.6429
C14H23O6N1S1	0.309457	0.799705	0.4286	1.6429
C14H23O6N3	0.764896	0.445581	0.4286	1.6429
C14H23O7N1	-0.667347	0.53486	0.5	1.6429
C14H23O7N1S1	-0.123367	0.921262	0.5	1.6429
C14H23O8N1	-0.985425	0.108823	0.5714	1.6429
C14H24O2	0.64846	0.550826	0.1429	1.7143
C14H24O3	0.796304	0.413571	0.2143	1.7143
C14H24O4	0.947025	0.208145	0.2857	1.7143
C14H24O4S1	0.748973	0.461095	0.2857	1.7143
C14H24O5S1	0.927496	0.243914	0.3571	1.7143
C14H24O6	-0.94393	0.214195	0.4286	1.7143
C14H24O6S1	0.601027	0.589517	0.4286	1.7143
C14H24O7	-0.947074	0.208048	0.5	1.7143
C14H24O7S1	-0.563935	0.618574	0.5	1.7143
C14H24O8	-0.938026	0.225304	0.5714	1.7143
C14H24O8S1	-0.746271	0.463685	0.5714	1.7143
C14H24O9	-0.902711	0.283147	0.6429	1.7143
C14H24O9S1	-0.761851	0.448582	0.6429	1.7143
C14H26O10	0.998504	0.0348248	0.7143	1.8571
C14H26O4	0.956383	0.188718	0.2857	1.8571
C14H26O4S1	0.471869	0.687159	0.2857	1.8571
C14H26O5	-0.791048	0.419072	0.3571	1.8571
C14H26O5S1	0.947206	0.207786	0.3571	1.8571
C14H26O6	-0.914182	0.265668	0.4286	1.8571
C14H26O6S1	0.717765	0.49033	0.4286	1.8571
C14H26O7	-0.359995	0.765557	0.5	1.8571
C14H28O11S1	-0.390902	0.744326	0.7857	2
C14H28O3S1	0.168664	0.89211	0.2143	2
C14H28O4S1	-0.629534	0.566492	0.2857	2
C14H30O4S1	-0.356644	0.767842	0.2857	2.1429
C14H30O5S1	0.970533	0.154931	0.3571	2.1429
C14H7O6N1	-0.438066	0.711328	0.4286	0.5
C14H7O7N1	-0.893361	0.296681	0.5	0.5
C14H8O3	0.123049	0.921466	0.2143	0.5714
C14H8O4	-0.729105	0.479873	0.2857	0.5714
C14H8O4N2	-0.430623	0.716588	0.2857	0.5714
C14H8O4S1	0.304859	0.802781	0.2857	0.5714
C14H8O5	-0.174427	0.888385	0.3571	0.5714
C14H8O5N2	-0.935772	0.229409	0.3571	0.5714
C14H8O6	-0.925345	0.24755	0.4286	0.5714
C14H8O6N2	-0.968898	0.159191	0.4286	0.5714
C14H8O6S1	-0.69795	0.508191	0.4286	0.5714
C14H8O7	-0.984019	0.113966	0.5	0.5714
C14H8O8	-0.982006	0.12095	0.5714	0.5714
C14H8O9	-0.829091	0.377717	0.6429	0.5714
C14H9O2N1	-0.807647	0.401481	0.1429	0.6429
C14H9O3N1	-0.869098	0.3294	0.2143	0.6429
C14H9O4N1	-0.797954	0.411831	0.2857	0.6429
C14H9O5N1	-0.804442	0.404929	0.3571	0.6429
C14H9O6N1	-0.554732	0.625641	0.4286	0.6429
C14H9O7N1	-0.789291	0.420896	0.5	0.6429
C14H9O7N1S1	-0.55452	0.625804	0.5	0.6429
C14H9O8N1	-0.988059	0.0984818	0.5714	0.6429
C15H10O10	-0.814499	0.394024	0.6667	0.6667
C15H10O2	-0.923474	0.250674	0.1333	0.6667
C15H10O3	-0.392196	0.743431	0.2	0.6667
C15H10O4	-0.571765	0.612518	0.2667	0.6667
C15H10O4N2	-0.694845	0.510946	0.2667	0.6667
C15H10O5	-0.631631	0.564772	0.3333	0.6667
C15H10O5N2	-0.765712	0.444774	0.3333	0.6667
C15H10O5S1	0.386178	0.74759	0.3333	0.6667
C15H10O6	-0.816501	0.391822	0.4	0.6667
C15H10O6N2	-0.999907	0.00869973	0.4	0.6667
C15H10O6S1	-0.525593	0.647687	0.4	0.6667
C15H10O7	-0.688533	0.51651	0.4667	0.6667
C15H10O7N2	-0.961327	0.177628	0.4667	0.6667
C15H10O7S1	0.580732	0.605533	0.4667	0.6667
C15H10O8	-0.924339	0.249235	0.5333	0.6667
C15H10O8N2	-0.909969	0.27221	0.5333	0.6667
C15H10O8S1	-0.0863987	0.944928	0.5333	0.6667
C15H10O9	-0.87311	0.324199	0.6	0.6667
C15H11O3N1	0.76782	0.442683	0.2	0.7333
C15H11O4N1	0.961154	0.178027	0.2667	0.7333
C15H11O5N1	0.0899206	0.942677	0.3333	0.7333
C15H11O5N1S1	0.920721	0.255203	0.3333	0.7333
C15H11O6N1	-0.831073	0.375454	0.4	0.7333
C15H11O6N1S1	-0.284617	0.816267	0.4	0.7333
C15H11O7N1	-0.741669	0.468069	0.4667	0.7333
C15H11O7N1S1	-0.77473	0.435771	0.4667	0.7333
C15H11O8N1	-0.789951	0.420212	0.5333	0.7333
C15H11O9N1	-0.913045	0.267449	0.6	0.7333
C15H12O10	-0.89615	0.292705	0.6667	0.8
C15H12O11	-0.949504	0.203175	0.7333	0.8
C15H12O2	0.809358	0.399631	0.1333	0.8
C15H12O3	0.306903	0.801414	0.2	0.8
C15H12O3N2	-0.72049	0.487834	0.2	0.8
C15H12O4	-0.996116	0.0561297	0.2667	0.8
C15H12O4N2	0.164339	0.894902	0.2667	0.8
C15H12O4S1	0.944605	0.21289	0.2667	0.8
C15H12O5	-0.389289	0.745442	0.3333	0.8
C15H12O5N2	-0.862474	0.337828	0.3333	0.8
C15H12O5S1	0.892034	0.298556	0.3333	0.8
C15H12O6	-0.788556	0.421658	0.4	0.8
C15H12O6N2	-0.990774	0.0865459	0.4	0.8
C15H12O6S1	-0.709761	0.497606	0.4	0.8
C15H12O7	-0.902397	0.283612	0.4667	0.8
C15H12O7N2	-0.755723	0.454571	0.4667	0.8
C15H12O7S1	0.86764	0.331272	0.4667	0.8
C15H12O8	-0.747609	0.462404	0.5333	0.8
C15H12O8N2	-0.822196	0.385497	0.5333	0.8
C15H12O8S1	0.0715618	0.954403	0.5333	0.8
C15H12O9	-0.889799	0.301689	0.6	0.8
C15H12O9N2	-0.982467	0.119389	0.6	0.8
C15H12O9S1	-0.97557	0.141007	0.6	0.8
C15H13O3N1	-0.895537	0.293584	0.2	0.8667
C15H13O4N1	0.706933	0.500156	0.2667	0.8667
C15H13O5N1	-0.998728	0.0321088	0.3333	0.8667
C15H13O5N1S1	0.850963	0.352039	0.3333	0.8667
C15H13O6N1	-0.512694	0.657295	0.4	0.8667
C15H13O6N1S1	0.766157	0.444333	0.4	0.8667
C15H13O7N1	-0.783401	0.426966	0.4667	0.8667
C15H13O7N1S1	0.0739813	0.952859	0.4667	0.8667
C15H13O8N1	-0.639899	0.557952	0.5333	0.8667
C15H13O8N1S1	0.121714	0.922322	0.5333	0.8667
C15H13O9N1	-0.96745	0.162875	0.6	0.8667
C15H14O10	-0.997755	0.0426699	0.6667	0.9333
C15H14O11	-0.825211	0.382113	0.7333	0.9333
C15H14O2	0.569037	0.614632	0.1333	0.9333
C15H14O3	-0.210501	0.864981	0.2	0.9333
C15H14O3N2	-0.75641	0.453903	0.2	0.9333
C15H14O4	0.291522	0.811677	0.2667	0.9333
C15H14O4N2	-0.392068	0.74352	0.2667	0.9333
C15H14O4S1	0.930583	0.238601	0.2667	0.9333
C15H14O5	-0.258301	0.833675	0.3333	0.9333
C15H14O5N2	-0.862251	0.338108	0.3333	0.9333
C15H14O5S1	0.761893	0.44854	0.3333	0.9333
C15H14O6	-0.77895	0.431505	0.4	0.9333
C15H14O6N2	-0.304454	0.803052	0.4	0.9333
C15H14O6N2S1	0.641598	0.556543	0.4	0.9333
C15H14O6S1	0.77272	0.437792	0.4	0.9333
C15H14O7	-0.655172	0.545192	0.4667	0.9333
C15H14O7N2	-0.808123	0.400967	0.4667	0.9333
C15H14O7N2S1	-0.0656773	0.958158	0.4667	0.9333
C15H14O7S1	0.998471	0.0352111	0.4667	0.9333
C15H14O8	0.025678	0.983651	0.5333	0.9333
C15H14O8N2	-0.982687	0.118635	0.5333	0.9333
C15H14O8S1	-0.322074	0.79124	0.5333	0.9333
C15H14O9	-0.918996	0.258003	0.6	0.9333
C15H14O9N2	-0.93043	0.238868	0.6	0.9333
C15H14O9S1	-0.701586	0.504951	0.6	0.9333
C15H15O10N1	-0.976209	0.139145	0.6667	1
C15H15O2N1	-0.479799	0.681419	0.1333	1
C15H15O3N1	0.090497	0.942309	0.2	1
C15H15O3P1	0.82723	0.379831	0.2	1
C15H15O4N1	-0.999638	0.0171223	0.2667	1
C15H15O5N1	0.986062	0.106415	0.3333	1
C15H15O5N1S1	-0.242231	0.844242	0.3333	1
C15H15O6N1	-0.66202	0.539399	0.4	1
C15H15O6N1S1	0.606375	0.585246	0.4	1
C15H15O7N1	-0.862413	0.337904	0.4667	1
C15H15O7N1S1	0.992613	0.0774253	0.4667	1
C15H15O8N1	-0.890212	0.301112	0.5333	1
C15H15O8N1S1	-0.838221	0.367192	0.5333	1
C15H15O9N1	-0.978386	0.132603	0.6	1
C15H16O10	-0.999797	0.0128327	0.6667	1.0667
C15H16O10N2	-0.844246	0.360098	0.6667	1.0667
C15H16O10S1	-0.802958	0.406517	0.6667	1.0667
C15H16O11	-0.590624	0.597764	0.7333	1.0667
C15H16O2	0.898719	0.288999	0.1333	1.0667
C15H16O2N2	-0.810689	0.398185	0.1333	1.0667
C15H16O3	0.805499	0.403795	0.2	1.0667
C15H16O3N2	-0.891436	0.299397	0.2	1.0667
C15H16O3S1	0.719664	0.488592	0.2	1.0667
C15H16O4	-0.735492	0.473902	0.2667	1.0667
C15H16O4N2	-0.68959	0.515581	0.2667	1.0667
C15H16O4S1	0.569389	0.614359	0.2667	1.0667
C15H16O5	-0.979792	0.128202	0.3333	1.0667
C15H16O5N2	-0.965828	0.166907	0.3333	1.0667
C15H16O5S1	0.891737	0.298974	0.3333	1.0667
C15H16O6	0.165386	0.894226	0.4	1.0667
C15H16O6N2	-0.968611	0.159928	0.4	1.0667
C15H16O6N2S1	0.0477073	0.969617	0.4	1.0667
C15H16O6S1	0.950619	0.200899	0.4	1.0667
C15H16O7	-0.285124	0.815931	0.4667	1.0667
C15H16O7N2	-0.946733	0.208723	0.4667	1.0667
C15H16O7N2S1	-0.998107	0.0391778	0.4667	1.0667
C15H16O7S1	0.60245	0.588382	0.4667	1.0667
C15H16O8	-0.889796	0.301693	0.5333	1.0667
C15H16O8N2	-0.94845	0.205302	0.5333	1.0667
C15H16O8N2S1	-0.999849	0.0110569	0.5333	1.0667
C15H16O8S1	0.969395	0.157908	0.5333	1.0667
C15H16O9	-0.983404	0.116143	0.6	1.0667
C15H16O9N2	-0.837186	0.368398	0.6	1.0667
C15H16O9S1	-0.671391	0.531395	0.6	1.0667
C15H17O10N1	-0.83986	0.365275	0.6667	1.1333
C15H17O3N1	-0.659724	0.541347	0.2	1.1333
C15H17O4N1	-0.811716	0.397068	0.2667	1.1333
C15H17O5N1	-0.954505	0.192769	0.3333	1.1333
C15H17O5N1S1	0.4682	0.689805	0.3333	1.1333
C15H17O6N1	-0.911632	0.269646	0.4	1.1333
C15H17O6N1S1	0.964753	0.169527	0.4	1.1333
C15H17O7N1	-0.825522	0.381762	0.4667	1.1333
C15H17O7N1S1	-0.663786	0.537897	0.4667	1.1333
C15H17O8N1	-0.985498	0.108551	0.5333	1.1333
C15H17O8N1S1	-0.986531	0.104604	0.5333	1.1333
C15H17O9N1	-0.993027	0.075225	0.6	1.1333
C15H17O9N1S1	-0.179698	0.884976	0.6	1.1333
C15H18O10	-0.954039	0.193761	0.6667	1.2
C15H18O10S1	-0.985406	0.108894	0.6667	1.2
C15H18O11	-0.738949	0.470644	0.7333	1.2
C15H18O2	0.0322189	0.979485	0.1333	1.2
C15H18O2N2	-0.620076	0.574203	0.1333	1.2
C15H18O3	-0.721966	0.486478	0.2	1.2
C15H18O3N2	-0.874262	0.322692	0.2	1.2
C15H18O3S1	0.864724	0.334987	0.2	1.2
C15H18O4	0.745627	0.464301	0.2667	1.2
C15H18O4N2	-0.73255	0.47666	0.2667	1.2
C15H18O4S1	0.97007	0.156147	0.2667	1.2
C15H18O5	-0.834401	0.371628	0.3333	1.2
C15H18O5N2	-0.799724	0.409959	0.3333	1.2
C15H18O5S1	-0.825767	0.381485	0.3333	1.2
C15H18O6	-0.733019	0.476221	0.4	1.2
C15H18O6N2	0.421367	0.723101	0.4	1.2
C15H18O6N2S1	-0.0203537	0.987042	0.4	1.2
C15H18O6S1	-0.935387	0.230103	0.4	1.2
C15H18O7	-0.874541	0.322325	0.4667	1.2
C15H18O7N2	-0.909625	0.272738	0.4667	1.2
C15H18O7N2S1	-0.897843	0.290267	0.4667	1.2
C15H18O7S1	0.658114	0.542709	0.4667	1.2
C15H18O8	-0.726931	0.481892	0.5333	1.2
C15H18O8N2	-0.976909	0.137073	0.5333	1.2
C15H18O8S1	0.298503	0.807025	0.5333	1.2
C15H18O9	-0.0482742	0.969256	0.6	1.2
C15H18O9N2	-0.999246	0.0247231	0.6	1.2
C15H18O9S1	0.0687153	0.95622	0.6	1.2
C15H19O10N1	-0.756603	0.453715	0.6667	1.2667
C15H19O2N1	0.520513	0.651481	0.1333	1.2667
C15H19O3N1	0.710096	0.497303	0.2	1.2667
C15H19O4N1	-0.16582	0.893946	0.2667	1.2667
C15H19O5N1	-0.874538	0.322329	0.3333	1.2667
C15H19O5N1S1	0.55986	0.62171	0.3333	1.2667
C15H19O6N1	-0.789861	0.420305	0.4	1.2667
C15H19O6N1S1	0.495767	0.669774	0.4	1.2667
C15H19O7N1	-0.830653	0.375934	0.4667	1.2667
C15H19O7N1S1	0.986938	0.103009	0.4667	1.2667
C15H19O8N1	-0.942774	0.216414	0.5333	1.2667
C15H19O8N1S1	-0.0598375	0.961883	0.5333	1.2667
C15H19O9N1	-0.996207	0.0554632	0.6	1.2667
C15H19O9N1S1	-0.941512	0.218811	0.6	1.2667
C15H20O1	-0.92107	0.254634	0.0667	1.3333
C15H20O10	0.962716	0.174388	0.6667	1.3333
C15H20O10S1	-0.812844	0.395837	0.6667	1.3333
C15H20O11	-0.979316	0.129708	0.7333	1.3333
C15H20O2	-0.919538	0.257127	0.1333	1.3333
C15H20O3	-0.981826	0.121558	0.2	1.3333
C15H20O3N2	-0.364184	0.762696	0.2	1.3333
C15H20O3S1	0.854769	0.347397	0.2	1.3333
C15H20O4	-0.887319	0.30513	0.2667	1.3333
C15H20O4N2	-0.998765	0.0316363	0.2667	1.3333
C15H20O4S1	-0.742477	0.467302	0.2667	1.3333
C15H20O5	0.888747	0.303153	0.3333	1.3333
C15H20O5N2	-0.857268	0.34432	0.3333	1.3333
C15H20O5S1	0.767675	0.442827	0.3333	1.3333
C15H20O6	-0.293224	0.810543	0.4	1.3333
C15H20O6N2	-0.779092	0.431361	0.4	1.3333
C15H20O6S1	0.502786	0.664617	0.4	1.3333
C15H20O7	-0.861594	0.338933	0.4667	1.3333
C15H20O7N2	-0.877996	0.317761	0.4667	1.3333
C15H20O7N2S1	-0.582318	0.604292	0.4667	1.3333
C15H20O7S1	-0.857327	0.344247	0.4667	1.3333
C15H20O8	-0.884454	0.309062	0.5333	1.3333
C15H20O8N2	-0.951897	0.198261	0.5333	1.3333
C15H20O8S1	0.554859	0.625544	0.5333	1.3333
C15H20O9	-0.970453	0.155141	0.6	1.3333
C15H20O9N2	-0.972306	0.150175	0.6	1.3333
C15H20O9S1	-0.64417	0.554406	0.6	1.3333
C15H21O10N1	-0.982548	0.11911	0.6667	1.4
C15H21O3N1	-0.995489	0.0604907	0.2	1.4
C15H21O4N1	-0.936568	0.227968	0.2667	1.4
C15H21O5N1	-0.781566	0.428843	0.3333	1.4
C15H21O5N1S1	0.259714	0.832743	0.3333	1.4
C15H21O6N1	-0.781366	0.429047	0.4	1.4
C15H21O6N1S1	0.999783	0.0132574	0.4	1.4
C15H21O7N1	-0.806789	0.402407	0.4667	1.4
C15H21O7N1S1	-0.652642	0.547321	0.4667	1.4
C15H21O7N3	-0.632422	0.564121	0.4667	1.4
C15H21O8N1	-0.888767	0.303126	0.5333	1.4
C15H21O8N1S1	0.256101	0.835124	0.5333	1.4
C15H21O9N1	-0.981159	0.123774	0.6	1.4
C15H22O1	0.93718	0.226853	0.0667	1.4667
C15H22O10	-0.986524	0.104633	0.6667	1.4667
C15H22O10S1	-0.914785	0.26472	0.6667	1.4667
C15H22O11	-0.966757	0.164611	0.7333	1.4667
C15H22O3S1	0.717056	0.490979	0.2	1.4667
C15H22O4	0.76971	0.440801	0.2667	1.4667
C15H22O4S1	0.626882	0.568661	0.2667	1.4667
C15H22O5	0.968622	0.159901	0.3333	1.4667
C15H22O5N2	-0.241358	0.844814	0.3333	1.4667
C15H22O5S1	0.94979	0.202592	0.3333	1.4667
C15H22O6	0.471872	0.687157	0.4	1.4667
C15H22O6S1	0.745939	0.464002	0.4	1.4667
C15H22O7	-0.938664	0.224129	0.4667	1.4667
C15H22O7N2	-0.782418	0.427973	0.4667	1.4667
C15H22O7S1	0.864289	0.335538	0.4667	1.4667
C15H22O7S2	0.749224	0.460854	0.4667	1.4667
C15H22O8	-0.940827	0.2201	0.5333	1.4667
C15H22O8N2	-0.979852	0.128009	0.5333	1.4667
C15H22O8S1	-0.792021	0.418058	0.5333	1.4667
C15H22O9	-0.937839	0.225647	0.6	1.4667
C15H22O9S1	-0.980949	0.124464	0.6	1.4667
C15H23O3N1	-0.39844	0.739104	0.2	1.5333
C15H23O4N1	-0.379706	0.75205	0.2667	1.5333
C15H23O5N1	-0.397047	0.74007	0.3333	1.5333
C15H23O5N1S1	0.318035	0.793954	0.3333	1.5333
C15H23O6N1	-0.835349	0.370531	0.4	1.5333
C15H23O6N1S1	0.512291	0.657594	0.4	1.5333
C15H23O6N3	-0.436984	0.712093	0.4	1.5333
C15H23O7N1	-0.938489	0.224452	0.4667	1.5333
C15H23O7N1S1	0.967105	0.163741	0.4667	1.5333
C15H23O8N1	-0.915483	0.263617	0.5333	1.5333
C15H23O8N1S1	-0.297373	0.807779	0.5333	1.5333
C15H23O9N1	-0.999959	0.00579662	0.6	1.5333
C15H24O1	0.979062	0.130503	0.0667	1.6
C15H24O10	-0.989751	0.0912225	0.6667	1.6
C15H24O10S1	-0.439359	0.710411	0.6667	1.6
C15H24O3S1	0.203817	0.86933	0.2	1.6
C15H24O4	0.331821	0.784674	0.2667	1.6
C15H24O4S1	-0.461487	0.694632	0.2667	1.6
C15H24O5	0.970796	0.154234	0.3333	1.6
C15H24O5S1	0.94698	0.208234	0.3333	1.6
C15H24O6	-0.96495	0.16905	0.4	1.6
C15H24O6N2	0.069314	0.955838	0.4	1.6
C15H24O6S1	0.935668	0.229596	0.4	1.6
C15H24O7	0.334656	0.78276	0.4667	1.6
C15H24O7N2	-0.250547	0.838779	0.4667	1.6
C15H24O7S1	0.88963	0.301925	0.4667	1.6
C15H24O8	-0.855065	0.347034	0.5333	1.6
C15H24O8S1	-0.872786	0.324622	0.5333	1.6
C15H24O9	-0.863682	0.336305	0.6	1.6
C15H24O9S1	-0.998744	0.0319167	0.6	1.6
C15H25O6N1	-0.862082	0.338321	0.4	1.6667
C15H25O6N1S1	0.269687	0.826159	0.4	1.6667
C15H25O7N1	-0.326265	0.78842	0.4667	1.6667
C15H25O7N1S1	-0.43745	0.711764	0.4667	1.6667
C15H25O8N1	-0.611196	0.581377	0.5333	1.6667
C15H26O3	0.636925	0.560413	0.2	1.7333
C15H26O4	0.697287	0.508781	0.2667	1.7333
C15H26O4S1	0.585222	0.602015	0.2667	1.7333
C15H26O5	0.254309	0.836304	0.3333	1.7333
C15H26O5S1	0.982906	0.117879	0.3333	1.7333
C15H26O6	-0.305858	0.802114	0.4	1.7333
C15H26O6S1	0.899205	0.288292	0.4	1.7333
C15H26O7	-0.903653	0.28175	0.4667	1.7333
C15H26O7S1	0.0190491	0.987872	0.4667	1.7333
C15H26O8	-0.942709	0.216539	0.5333	1.7333
C15H26O8S1	-0.988374	0.0971703	0.5333	1.7333
C15H26O9	-0.91891	0.258142	0.6	1.7333
C15H28O4	0.438017	0.711362	0.2667	1.8667
C15H28O5	0.919059	0.257901	0.3333	1.8667
C15H28O5S1	0.778723	0.431735	0.3333	1.8667
C15H28O6	0.701804	0.504756	0.4	1.8667
C15H28O7	0.266394	0.828336	0.4667	1.8667
C15H28O8	0.330099	0.785836	0.5333	1.8667
C15H8O5	-0.967703	0.162239	0.3333	0.5333
C15H8O6	0.0556482	0.964555	0.4	0.5333
C15H8O6S1	-0.29516	0.809254	0.4	0.5333
C15H8O7	-0.952241	0.197545	0.4667	0.5333
C15H8O8	-0.945094	0.211941	0.5333	0.5333
C15H9O4N1	-0.602973	0.587965	0.2667	0.6
C15H9O5N1	-0.768395	0.442111	0.3333	0.6
C15H9O6N1	-0.8748	0.321986	0.4	0.6
C15H9O7N1	-0.961037	0.178297	0.4667	0.6
C15H9O8N1	-0.998977	0.0287964	0.5333	0.6
C16H10O10	0.0457757	0.970848	0.625	0.625
C16H10O3	-0.905854	0.278461	0.1875	0.625
C16H10O4	0.00984283	0.993734	0.25	0.625
C16H10O5	-0.774264	0.436241	0.3125	0.625
C16H10O6	-0.830465	0.37615	0.375	0.625
C16H10O6N2	-0.78301	0.427366	0.375	0.625
C16H10O7	-0.679761	0.524167	0.4375	0.625
C16H10O7S1	-0.852895	0.34969	0.4375	0.625
C16H10O8	-0.875892	0.320547	0.5	0.625
C16H10O9	-0.928523	0.242158	0.5625	0.625
C16H11O4N1	-0.995718	0.0589358	0.25	0.6875
C16H11O5N1	-0.763574	0.446886	0.3125	0.6875
C16H11O6N1	-0.610928	0.581593	0.375	0.6875
C16H11O7N1	-0.991822	0.081472	0.4375	0.6875
C16H11O8N1	-0.997724	0.0429602	0.5	0.6875
C16H11O9N1	-0.9107	0.271086	0.5625	0.6875
C16H12O10	-0.83526	0.370634	0.625	0.75
C16H12O11	-0.958059	0.185031	0.6875	0.75
C16H12O2	-0.384614	0.748669	0.125	0.75
C16H12O3	-0.870394	0.327728	0.1875	0.75
C16H12O4	-0.857175	0.344435	0.25	0.75
C16H12O4N2	-0.60223	0.588558	0.25	0.75
C16H12O5N2	0.996871	0.0503733	0.3125	0.75
C16H12O6	-0.559732	0.621808	0.375	0.75
C16H12O6N2	-0.942925	0.216126	0.375	0.75
C16H12O6S1	0.970784	0.154266	0.375	0.75
C16H12O7	-0.543115	0.63449	0.4375	0.75
C16H12O7N2	-0.66574	0.536232	0.4375	0.75
C16H12O7S1	-0.613092	0.579851	0.4375	0.75
C16H12O8	0.354507	0.769298	0.5	0.75
C16H12O8N2	-0.837286	0.368281	0.5	0.75
C16H12O8S1	-0.730824	0.478272	0.5	0.75
C16H12O9	-0.731465	0.477674	0.5625	0.75
C16H12O9N2	-0.953017	0.195921	0.5625	0.75
C16H12O9S1	-0.208225	0.866463	0.5625	0.75
C16H13O10N1	-0.99997	0.00495691	0.625	0.8125
C16H13O3N1	0.937823	0.225676	0.1875	0.8125
C16H13O4N1	-0.300046	0.805996	0.25	0.8125
C16H13O5N1	-0.330815	0.785353	0.3125	0.8125
C16H13O6N1	-0.326508	0.788256	0.375	0.8125
C16H13O7N1	-0.79161	0.418487	0.4375	0.8125
C16H13O8N1	-0.630559	0.565652	0.5	0.8125
C16H13O8N1S1	-0.840479	0.364547	0.5	0.8125
C16H13O9N1	-0.720588	0.487744	0.5625	0.8125
C16H14O10	-0.812516	0.396194	0.625	0.875
C16H14O11	-0.980673	0.125365	0.6875	0.875
C16H14O2	0.971713	0.151782	0.125	0.875
C16H14O3	0.817986	0.390181	0.1875	0.875
C16H14O4	0.69294	0.51263	0.25	0.875
C16H14O4N2	0.762427	0.448015	0.25	0.875
C16H14O5N2	-0.554962	0.625465	0.3125	0.875
C16H14O5S1	0.764825	0.445651	0.3125	0.875
C16H14O6	-0.501702	0.665415	0.375	0.875
C16H14O6N2	-0.461588	0.694559	0.375	0.875
C16H14O6S1	0.876356	0.319935	0.375	0.875
C16H14O7	-0.736817	0.472656	0.4375	0.875
C16H14O7N2	-0.892756	0.297538	0.4375	0.875
C16H14O7S1	0.681116	0.52299	0.4375	0.875
C16H14O8	-0.597743	0.592128	0.5	0.875
C16H14O8N2	-0.957277	0.186761	0.5	0.875
C16H14O8S1	0.547319	0.631297	0.5	0.875
C16H14O9	-0.00562426	0.996419	0.5625	0.875
C16H14O9N2	-0.996639	0.0522071	0.5625	0.875
C16H14O9S1	-0.975203	0.142067	0.5625	0.875
C16H15O10N1	-0.987555	0.100542	0.625	0.9375
C16H15O3N1	0.65781	0.542966	0.1875	0.9375
C16H15O4N1	0.26278	0.830721	0.25	0.9375
C16H15O5N1	0.349214	0.772897	0.3125	0.9375
C16H15O6N1	-0.871304	0.32655	0.375	0.9375
C16H15O6N1S1	-0.847949	0.355675	0.375	0.9375
C16H15O7N1	-0.665951	0.536052	0.4375	0.9375
C16H15O7N1S1	-0.413488	0.728621	0.4375	0.9375
C16H15O8N1	-0.789421	0.420762	0.5	0.9375
C16H15O8N1S1	-0.292076	0.811308	0.5	0.9375
C16H15O9N1	-0.904565	0.280391	0.5625	0.9375
C16H16O10	-0.993347	0.0734755	0.625	1
C16H16O10N2	-0.884844	0.308529	0.625	1
C16H16O10S1	-0.766714	0.443781	0.625	1
C16H16O11	-0.881774	0.312699	0.6875	1
C16H16O12	-0.508175	0.660641	0.75	1
C16H16O2	0.6621	0.539331	0.125	1
C16H16O3	0.8819	0.312529	0.1875	1
C16H16O3N2	-0.211921	0.864056	0.1875	1
C16H16O3S1	0.928301	0.242539	0.1875	1
C16H16O4	-0.980076	0.127294	0.25	1
C16H16O4N2	-0.968829	0.159368	0.25	1
C16H16O4S1	0.808957	0.400065	0.25	1
C16H16O5	0.687141	0.517731	0.3125	1
C16H16O5N2	-0.606742	0.584952	0.3125	1
C16H16O5S1	0.778887	0.431569	0.3125	1
C16H16O6	-0.608032	0.583918	0.375	1
C16H16O6N2	0.406696	0.733361	0.375	1
C16H16O6N2S1	-0.80256	0.406941	0.375	1
C16H16O6S1	0.982613	0.118889	0.375	1
C16H16O7	-0.733228	0.476025	0.4375	1
C16H16O7N2	-0.0998822	0.936307	0.4375	1
C16H16O7S1	0.949648	0.202881	0.4375	1
C16H16O8	-0.904307	0.280777	0.5	1
C16H16O8N2	-0.850535	0.352557	0.5	1
C16H16O8S1	0.10316	0.93421	0.5	1
C16H16O9	0.973529	0.146806	0.5625	1
C16H16O9N2	-0.985697	0.107802	0.5625	1
C16H16O9S1	-0.490624	0.673538	0.5625	1
C16H17O10N1	-0.950184	0.201789	0.625	1.0625
C16H17O3N1	0.996473	0.0534859	0.1875	1.0625
C16H17O3P1	0.720259	0.488046	0.1875	1.0625
C16H17O4N1	0.0973637	0.937918	0.25	1.0625
C16H17O5N1	0.418111	0.725385	0.3125	1.0625
C16H17O5N1S1	-0.81004	0.39889	0.3125	1.0625
C16H17O6N1	0.0707003	0.954953	0.375	1.0625
C16H17O6N1S1	-0.997482	0.0451899	0.375	1.0625
C16H17O7N1	-0.797657	0.412145	0.4375	1.0625
C16H17O7N1S1	-0.298436	0.80707	0.4375	1.0625
C16H17O8N1	-0.977796	0.134407	0.5	1.0625
C16H17O8N1S1	0.956098	0.189339	0.5	1.0625
C16H17O9N1	-0.973851	0.145906	0.5625	1.0625
C16H17O9N1S1	-0.753436	0.45679	0.5625	1.0625
C16H18O10	-0.99852	0.0346382	0.625	1.125
C16H18O10N2	-0.99513	0.0628521	0.625	1.125
C16H18O10S1	-0.544477	0.633456	0.625	1.125
C16H18O11	-0.927035	0.244698	0.6875	1.125
C16H18O11S1	0.949418	0.203348	0.6875	1.125
C16H18O12	-0.631522	0.564861	0.75	1.125
C16H18O2	0.730418	0.478651	0.125	1.125
C16H18O3	0.275758	0.822142	0.1875	1.125
C16H18O3S1	0.734249	0.475069	0.1875	1.125
C16H18O4	-0.68065	0.523395	0.25	1.125
C16H18O4N2	-0.840379	0.364665	0.25	1.125
C16H18O4S1	0.667945	0.534349	0.25	1.125
C16H18O5	-0.0951535	0.939332	0.3125	1.125
C16H18O5N2	-0.733118	0.476129	0.3125	1.125
C16H18O5S1	0.827609	0.379401	0.3125	1.125
C16H18O6	0.587605	0.600142	0.375	1.125
C16H18O6N2	-0.931221	0.237489	0.375	1.125
C16H18O6N2S1	0.232888	0.850365	0.375	1.125
C16H18O6S1	0.656531	0.544046	0.375	1.125
C16H18O7	-0.781922	0.428479	0.4375	1.125
C16H18O7N2	-0.854469	0.347765	0.4375	1.125
C16H18O7N2S1	0.472827	0.686467	0.4375	1.125
C16H18O7S1	0.816082	0.392283	0.4375	1.125
C16H18O8	-0.81923	0.388802	0.5	1.125
C16H18O8N2	-0.821015	0.386817	0.5	1.125
C16H18O8N2S1	-0.269313	0.826407	0.5	1.125
C16H18O8S1	0.863518	0.336512	0.5	1.125
C16H18O9	-0.964814	0.169379	0.5625	1.125
C16H18O9N2	-0.944886	0.212345	0.5625	1.125
[truncated: 3,261 more rows]
